# Supplementary material
Source: HighWire-hosted journal article supplement (https://gh.bmj.com/content/6/3/e002452)
Supplement: inline-supplementary-material-3 [file inline-supplementary-material-3.xlsx]

## Sheet: HIV_PSA_outputs
Iteration	Cost\n(QI for CH)	Cost\n(Standard of care)	DALY\n(QI for CH)	DALY\n(Standard of care)	NMB\n(QI for CH)	NMB\n(Standard of care)	Optimal\nStrategy	dist_p_HIV	dist_p_early	dist_c_QI	dist_p_early_int	dist_LE_sick_LBW	dist_eff_LBW_length	Dist_HIV_un (1)	Dist_HIV_un (2)	Dist_HIV_un (3)	Dist_HIV_late (1)	Dist_HIV_late (2)	Dist_HIV_late (3)	Dist_HIV_early (1)	Dist_HIV_early (2)	Dist_HIV_early (3)	Dist_healthy (1)	Dist_healthy (2)	Dist_healthy (3)	dist_dw_HIV_LBW	dist_p_inf_LBW_healthy	dist_p_inf_LBW_if_HIV	dist_p_HIV_treat	Infant death\n(QI for CH)	Infant death\n(Standard of care)	Early ANC initiation\n(QI for CH)	Early ANC initiation\n(Standard of care)	Dist_ane_early (2)	Dist_ane_early (3)	Dist_ane_late (1)	Dist_ane_late (2)	Dist_ane_late (3)	Dist_syph_un (1)	Dist_syph_un (2)	Dist_syph_un (3)	Dist_syph_un (4)	Dist_syph_early (1)	Dist_syph_early (2)	Dist_syph_early (3)	Dist_syph_early (4)	Dist_syph_late (1)	Dist_syph_late (2)	Dist_syph_late (3)
1	29653.6	0	1.67271	1.67555	-27562.7	2094.44	Standard of care	0.0107361	0.431882	29653.6	0.461426	58.6938	0.0362815	0.0844527	0.198723	0.716824	0.290099	0.023754	0.686147	0.021798	0.00770498	0.970497	0.0196588	0.102932	0.877409	0.413241	0.700798	0.14436	0.500681	0.0249933	0.0250533	0.461485	0.4324	0.83605	0.090555	0.0565443	0.826191	0.117265	0.252849	0.183044	0.500009	0.0640982	0.055751	0.00398051	0.903497	0.0367713	0.151094	0.0639841	0.707566
2	27914.2	0	1.928	1.9298	-25504.2	2412.25	Standard of care	0.02007	0.428962	27914.2	0.443872	59.1059	0.0114746	0.0866606	0.184178	0.729162	0.214548	0.0452239	0.740229	0.0116046	0.0156724	0.972723	0.0252751	0.0472595	0.927465	0.345247	0.612728	0.131936	0.441854	0.0287697	0.028811	0.444065	0.429984	0.810335	0.128075	0.072488	0.820585	0.106927	0.271518	0.178727	0.449719	0.100036	0.0341257	0.00202226	0.911341	0.0525111	0.154652	0.101247	0.643221
3	29831.6	0	1.17689	1.17534	-28360.5	1469.18	Standard of care	0.0140134	0.4279	29831.6	0.399622	59.9427	0.0304519	0.0694413	0.137145	0.793414	0.169098	0.0750704	0.755832	0.0582345	0.0139712	0.927794	0.0143233	0.0507227	0.934954	0.41184	0.860795	0.127256	0.510989	0.0175629	0.0175505	0.399904	0.428369	0.852671	0.0840077	0.12002	0.727561	0.152419	0.229604	0.121465	0.487962	0.160969	0.0348689	0.00014519	0.925703	0.0392831	0.141388	0.0597274	0.713814
4	32315.3	0	1.60342	1.60299	-30311	2003.74	Standard of care	0.0117457	0.409074	32315.3	0.403566	62.2431	0.0142312	0.0564433	0.170914	0.772643	0.219702	0.0115478	0.76875	0.00953378	0.0255208	0.964945	0.0213281	0.0439119	0.93476	0.363042	0.578091	0.129572	0.480463	0.0239782	0.0239791	0.4036	0.409611	0.815793	0.109548	0.0981194	0.813319	0.0885617	0.250827	0.164954	0.503158	0.0810611	0.027955	0.00324705	0.928682	0.0401162	0.137388	0.13552	0.684804
5	27668.4	0	1.60676	1.60706	-25660	2008.82	Standard of care	0.00659166	0.456198	27668.4	0.460792	57.6373	0.0534428	0.0493828	0.121326	0.829292	0.346271	0.037549	0.61618	0.0480092	0.05132	0.900671	0.0188914	0.108282	0.872827	0.293899	0.61534	0.143123	0.495101	0.0240376	0.0240538	0.460849	0.456386	0.868969	0.0962066	0.132601	0.738249	0.12915	0.271622	0.165843	0.500992	0.0615432	0.0546238	0.0142363	0.891468	0.0396718	0.184163	0.071056	0.616858
6	31883.6	0	1.04286	1.04882	-30580	1311.03	Standard of care	0.00926486	0.433189	31883.6	0.517248	56.7744	0.0566703	0.0622148	0.231201	0.706584	0.292691	0.023403	0.683906	0.0524798	0.0295573	0.917963	0.0109461	0.0892517	0.899802	0.362119	0.465065	0.127434	0.481023	0.0155377	0.0156415	0.517292	0.433739	0.743897	0.143894	0.0536563	0.813468	0.132875	0.290817	0.167451	0.459387	0.082345	0.0297496	0.00721571	0.94344	0.0195943	0.125765	0.0813445	0.692208
7	29318.7	0	4.04348	4.04154	-24264.3	5051.92	Standard of care	0.0240654	0.484104	29318.7	0.472264	57.9568	0.0338653	0.0715837	0.135975	0.792441	0.255221	0.0285211	0.716257	0.0376797	0.0301121	0.932208	0.056419	0.0691458	0.874435	0.404665	0.669783	0.128168	0.47156	0.0605069	0.0605054	0.472413	0.484882	0.872148	0.0856238	0.0733994	0.833049	0.0935516	0.275842	0.118267	0.48849	0.117401	0.059216	6.8839e-05	0.914283	0.0264326	0.117128	0.0488	0.68379
8	29909	0	2.00437	2.00641	-27403.6	2508.01	Standard of care	0.00724984	0.440673	29909	0.507373	57.9713	0.00808684	0.078984	0.142826	0.77819	0.197796	0.045596	0.756608	0.0728264	0.0198373	0.907336	0.0273027	0.052565	0.920132	0.389953	0.773621	0.124959	0.499734	0.0300268	0.0300637	0.507445	0.440926	0.802181	0.0836146	0.0777228	0.747696	0.174582	0.249471	0.134958	0.52571	0.0898602	0.063186	0.000959916	0.92115	0.0147045	0.12065	0.147068	0.692575
9	29673.1	0	2.20532	2.20345	-26916.4	2754.31	Standard of care	0.0137273	0.4355	29673.1	0.420718	61.3595	0.0560402	0.0313301	0.110372	0.858298	0.307412	0.0400069	0.652581	0.0319298	0.0508832	0.917187	0.0294267	0.0596454	0.910928	0.293162	0.743971	0.14091	0.505241	0.0329965	0.0329808	0.420856	0.435863	0.790483	0.141377	0.0502979	0.793576	0.156126	0.188855	0.188613	0.457288	0.165245	0.0555291	0.00415832	0.905564	0.0347481	0.150135	0.0530443	0.690574
10	29813.9	0	1.72455	1.73368	-27658.3	2167.09	Standard of care	0.0171264	0.417048	29813.9	0.472593	54.1188	0.0178219	0.0224366	0.181111	0.796452	0.2862	0.0557431	0.658056	0.00498229	0.03565	0.959368	0.0213053	0.0801474	0.898547	0.297577	0.662169	0.134726	0.511061	0.025732	0.0258917	0.472816	0.417813	0.839895	0.0929688	0.0360934	0.841767	0.122139	0.222679	0.186924	0.525255	0.0651415	0.0625005	0.0271427	0.857578	0.0527786	0.12848	0.122812	0.670356
11	32874.5	0	3.13275	3.13083	-28958.5	3913.54	Standard of care	0.00990807	0.462512	32874.5	0.434351	61.8231	0.0357902	0.0677042	0.136258	0.796038	0.233891	0.0333948	0.732714	0.014983	0.0564617	0.928555	0.044385	0.048515	0.9071	0.384895	0.447575	0.129919	0.473947	0.0469327	0.0469112	0.434428	0.462844	0.81304	0.108175	0.0598165	0.825607	0.114576	0.22627	0.148239	0.506573	0.118918	0.0418434	0.00163633	0.909589	0.0469309	0.200966	0.123582	0.589025
12	29160.8	0	2.30704	2.31145	-26277	2889.31	Standard of care	0.0099921	0.435068	29160.8	0.495327	55.7438	0.0561663	0.0465979	0.135696	0.817706	0.274373	0.0717473	0.65388	0.0305264	0.0109385	0.958535	0.031026	0.0703651	0.898609	0.407916	0.688422	0.130443	0.444702	0.034529	0.0346067	0.495467	0.435438	0.827557	0.0903495	0.0396966	0.833865	0.126439	0.198127	0.131956	0.524522	0.145395	0.0490282	0.0163725	0.878879	0.05572	0.174643	0.0467816	0.70702
13	31781.4	0	2.65007	2.65198	-28468.8	3314.97	Standard of care	0.0137689	0.433634	31781.4	0.455392	57.8925	0.054343	0.0213199	0.150025	0.828655	0.262113	0.0486239	0.689263	0.0461662	0.0202813	0.933553	0.0352854	0.0902923	0.874422	0.302318	0.462143	0.135683	0.440507	0.0396371	0.0396858	0.455531	0.4342	0.827534	0.0900651	0.0625228	0.821278	0.116199	0.197137	0.134339	0.500854	0.16767	0.0775311	0.00302236	0.906836	0.0126107	0.13395	0.0913399	0.723493
14	28165.9	0	1.35784	1.35463	-26468.6	1693.29	Standard of care	0.0118572	0.465558	28165.9	0.424848	60.8949	0.0109258	0.0525773	0.140908	0.806515	0.263798	0.0230998	0.713102	0.0555218	0.0112414	0.933237	0.0152715	0.0951717	0.889557	0.291849	0.415915	0.124628	0.479652	0.0202929	0.0202619	0.424915	0.465965	0.847938	0.0736425	0.112667	0.791643	0.0956891	0.184633	0.115071	0.585658	0.114638	0.067123	0.000372995	0.89465	0.0378536	0.167427	0.077075	0.672182
15	29880.7	0	1.91376	1.91252	-27488.5	2390.65	Standard of care	0.0225533	0.436344	29880.7	0.429503	55.9693	0.050017	0.0282099	0.175133	0.796657	0.277005	0.0726169	0.650378	0.0244458	0.00415906	0.971395	0.0215046	0.131503	0.846992	0.410544	0.825796	0.1366	0.473143	0.0284879	0.0285155	0.429885	0.437357	0.791292	0.122596	0.142732	0.739617	0.117651	0.214524	0.140439	0.531493	0.113545	0.0160857	0.0026715	0.920877	0.060366	0.233623	0.064483	0.665465
16	33131.6	0	2.40402	2.40526	-30126.5	3006.57	Standard of care	0.0102737	0.451234	33131.6	0.467161	59.9289	0.0115745	0.0546722	0.157071	0.788257	0.242444	0.022979	0.734577	0.0184054	0.00297298	0.978622	0.0314015	0.0961648	0.872434	0.305923	0.725978	0.126365	0.505959	0.0359958	0.036031	0.467217	0.451616	0.88632	0.0841011	0.0786431	0.818626	0.102731	0.206231	0.161827	0.445288	0.186655	0.0385954	3.82641e-06	0.897251	0.0641503	0.14769	0.101231	0.678794
17	30038.5	0	2.89005	2.88689	-26426	3608.62	Standard of care	0.0119709	0.481059	30038.5	0.447395	60.1291	0.0320325	0.0424908	0.164457	0.793053	0.248198	0.0209065	0.730896	0.0221453	0.00440899	0.973446	0.0407202	0.0463411	0.912939	0.369546	0.577305	0.137749	0.519078	0.0432838	0.0432456	0.447456	0.481483	0.754078	0.184506	0.0853644	0.761025	0.15361	0.19643	0.191816	0.418617	0.193137	0.0149902	0.00150818	0.955208	0.0282934	0.142823	0.0773265	0.695213
18	29639.4	0	2.64327	2.64224	-26335.3	3302.8	Standard of care	0.00969995	0.43777	29639.4	0.425158	60.9593	0.0371702	0.0220127	0.191494	0.786493	0.282333	0.00821234	0.709454	0.0355362	0.0369815	0.927482	0.0358594	0.0751327	0.889008	0.328044	0.687629	0.138482	0.51828	0.0395753	0.0395706	0.425179	0.438203	0.766694	0.0959299	0.0455672	0.850434	0.103999	0.218634	0.151017	0.494281	0.136067	0.0507484	0.00296096	0.898282	0.0480081	0.164099	0.11551	0.673231
19	30514.2	0	1.01899	1.01861	-29240.5	1273.26	Standard of care	0.00820048	0.448822	30514.2	0.442102	57.1957	0.0486327	0.107688	0.155388	0.736924	0.242222	0.010008	0.74777	0.00998609	0.0148059	0.975208	0.0101127	0.102341	0.887546	0.330332	0.767114	0.129159	0.447761	0.0152097	0.0152168	0.44212	0.44916	0.804308	0.115395	0.0848573	0.751384	0.163759	0.228966	0.115656	0.476785	0.178593	0.045909	0.00265604	0.931801	0.0196343	0.121908	0.0529674	0.756421
20	30089.1	0	3.59211	3.60102	-25598.9	4501.28	Standard of care	0.0137152	0.399737	30089.1	0.48631	60.1546	0.0513817	0.0633405	0.1603	0.776359	0.267504	0.0392492	0.693247	0.0194984	0.0181453	0.962356	0.0508288	0.0556167	0.893555	0.355092	0.610233	0.122875	0.452704	0.053787	0.0539331	0.48642	0.40037	0.878386	0.0819945	0.108285	0.756249	0.135465	0.321603	0.158733	0.368402	0.151262	0.0512864	1.00188e-05	0.920929	0.0277748	0.143719	0.119514	0.661226
21	31815.7	0	1.62734	1.62625	-29781.5	2032.82	Standard of care	0.00722381	0.441739	31815.7	0.424626	58.6149	0.0503262	0.0751163	0.13257	0.792313	0.294679	0.0332849	0.672036	0.020947	0.0127136	0.966339	0.0220013	0.0397193	0.938279	0.328103	0.774754	0.133588	0.479974	0.0243681	0.0243563	0.424684	0.441979	0.82819	0.0898775	0.0756323	0.793991	0.130376	0.229379	0.0949068	0.555303	0.120411	0.0454209	0.000260833	0.895491	0.0588274	0.115572	0.0777255	0.719835
22	31507.7	0	1.49602	1.50873	-29637.6	1885.91	Standard of care	0.0125165	0.399629	31507.7	0.50625	58.6111	0.0143682	0.0153569	0.20075	0.783893	0.325202	0.0621273	0.61267	0.031788	0.0294059	0.938806	0.0190034	0.0587753	0.922221	0.317623	0.487238	0.135163	0.484565	0.0223349	0.0225373	0.506411	0.400302	0.853108	0.0789041	0.0656725	0.785936	0.148392	0.171195	0.20824	0.52346	0.0971045	0.0283557	0.000839214	0.952398	0.0184069	0.177557	0.075833	0.664196
23	29604.2	0	3.3505	3.35647	-25416.1	4195.59	Standard of care	0.0161655	0.405235	29604.2	0.447173	62.4523	0.0142282	0.066768	0.184568	0.748664	0.312481	0.0416784	0.64584	0.0224672	0.0282517	0.949281	0.0463101	0.0647307	0.888959	0.31375	0.651523	0.142655	0.455634	0.0501341	0.0502396	0.447318	0.406063	0.865073	0.0546702	0.105031	0.815312	0.0796563	0.281256	0.176573	0.423243	0.118927	0.0906812	0.0170042	0.863665	0.02865	0.148418	0.0879484	0.642355
24	32027.1	0	2.44676	2.44916	-28968.7	3061.45	Standard of care	0.0156311	0.445838	32027.1	0.46132	58.7777	0.0506247	0.0474041	0.181879	0.770717	0.294901	0.0108606	0.694238	0.023485	0.0102952	0.96622	0.0327633	0.062771	0.904466	0.362976	0.885691	0.114882	0.550266	0.0365996	0.036652	0.461364	0.446465	0.809545	0.102847	0.0754069	0.796181	0.128412	0.291675	0.129657	0.461002	0.117665	0.018121	0.000351853	0.9405	0.0410272	0.117896	0.149122	0.651509
25	30847.6	0	3.93337	3.93222	-25930.9	4915.27	Standard of care	0.0154906	0.448806	30847.6	0.441171	60.5036	0.0135408	0.0409466	0.146961	0.812093	0.315817	0.050293	0.63389	0.0252964	0.0123762	0.962327	0.0554321	0.0629101	0.881658	0.345218	0.607746	0.126639	0.502521	0.0589124	0.0589108	0.441362	0.449351	0.91485	0.0514094	0.0452191	0.83704	0.117741	0.127016	0.141618	0.585274	0.146091	0.0446031	0.0124681	0.885597	0.0573316	0.229708	0.0519203	0.631801
26	29525.6	0	1.88001	1.88329	-27175.6	2354.12	Standard of care	0.0205569	0.425152	29525.6	0.448736	59.9486	0.0155011	0.0714563	0.0928683	0.835675	0.243235	0.0616855	0.695079	0.0382221	0.00996951	0.951808	0.0249886	0.03353	0.941481	0.349397	0.859201	0.139228	0.488441	0.0281111	0.0281709	0.44903	0.425635	0.836732	0.0840528	0.082258	0.758483	0.159259	0.208992	0.186206	0.527805	0.0769965	0.0421512	0.000748215	0.893045	0.0640557	0.124777	0.095437	0.683326
27	29739.1	0	1.2584	1.2521	-28166.1	1565.12	Standard of care	0.010495	0.460917	29739.1	0.391323	56.4986	0.0570504	0.0373038	0.144772	0.817924	0.30906	0.0253637	0.665576	0.0202431	0.0272453	0.952512	0.0150931	0.0666511	0.918256	0.403077	0.650474	0.131183	0.449477	0.0187973	0.0187126	0.391386	0.461308	0.709144	0.153595	0.0826613	0.798948	0.118391	0.269132	0.118447	0.494779	0.117641	0.0674035	0.00961892	0.899527	0.0234508	0.109069	0.0616249	0.685711
28	29143.8	0	1.20043	1.19401	-27643.3	1492.52	Standard of care	0.0135335	0.489056	29143.8	0.42846	59.0796	0.0140739	0.0165137	0.225845	0.757642	0.235777	0.0307503	0.733472	0.0212831	0.00869351	0.970023	0.0136338	0.0804998	0.905866	0.32415	0.624963	0.12839	0.546129	0.0178971	0.017818	0.428574	0.489674	0.882546	0.0394771	0.0722841	0.826586	0.10113	0.254699	0.170214	0.442607	0.13248	0.0345773	0.00500716	0.892487	0.0679288	0.113483	0.0636888	0.707951
29	31568.6	0	2.41974	2.41956	-28543.9	3024.45	Standard of care	0.00754096	0.463478	31568.6	0.458341	63.1699	0.0504011	0.0330128	0.143872	0.823115	0.188847	0.0508838	0.760269	0.0487769	0.00677591	0.944447	0.0334388	0.0604507	0.906111	0.335133	0.569322	0.124694	0.487899	0.0362439	0.0362489	0.458429	0.463739	0.778323	0.139196	0.0767654	0.817794	0.105441	0.197124	0.149038	0.499311	0.154526	0.0249427	0.00195558	0.934421	0.0386803	0.19807	0.068496	0.626689
30	30645.6	0	1.40678	1.40725	-28887.1	1759.07	Standard of care	0.0116261	0.450407	30645.6	0.459058	55.0686	0.0552947	0.0609	0.198463	0.740637	0.201693	0.0264454	0.771862	0.0350272	0.0540058	0.910967	0.0169871	0.0776556	0.905357	0.329625	0.790254	0.121664	0.426112	0.0209856	0.0210065	0.459121	0.451046	0.791312	0.115842	0.0637566	0.820379	0.115865	0.284968	0.102725	0.419638	0.192668	0.0642617	0.0107901	0.855604	0.0693443	0.121677	0.0887721	0.689995
31	30182.3	0	1.46648	1.46701	-28349.2	1833.76	Standard of care	0.0112055	0.430941	30182.3	0.436322	54.8674	0.0310124	0.0222564	0.1543	0.823444	0.248804	0.0196621	0.731534	0.00633931	0.0349665	0.958694	0.0182946	0.0698387	0.911867	0.335893	0.790976	0.140111	0.542834	0.0219243	0.0219448	0.43638	0.431328	0.880019	0.0756922	0.0554751	0.752764	0.191761	0.220544	0.196152	0.428307	0.154997	0.0552395	6.92875e-07	0.900531	0.0442293	0.10992	0.124598	0.688447
32	29492	0	2.00691	2.00657	-26983.4	2508.21	Standard of care	0.0117313	0.430892	29492	0.426299	60.9573	0.031942	0.0531311	0.155565	0.791303	0.259612	0.0192343	0.721154	0.0546366	0.0123458	0.933018	0.0247136	0.105912	0.869374	0.338515	0.606528	0.132908	0.462945	0.0300132	0.0300267	0.426351	0.431376	0.784677	0.120409	0.0572292	0.752663	0.190108	0.221172	0.271561	0.454305	0.0529624	0.118788	0.0132571	0.816033	0.0519218	0.143284	0.109949	0.681531
33	28702.6	0	1.24777	1.24267	-27142.9	1553.34	Standard of care	0.0117195	0.469558	28702.6	0.40631	59.0235	0.052609	0.0405449	0.170343	0.789112	0.224308	0.0293239	0.746368	0.0311789	0.00644964	0.962371	0.0140929	0.0873019	0.898605	0.367076	0.725634	0.133863	0.532824	0.0186227	0.0185617	0.406404	0.469986	0.865847	0.0909578	0.0863557	0.827441	0.0862037	0.22562	0.152121	0.492011	0.130249	0.0266759	0.00357326	0.941228	0.0285232	0.140314	0.0948312	0.704633
34	31235.3	0	2.26117	2.26407	-28408.8	2830.09	Standard of care	0.0112445	0.42972	31235.3	0.471159	60.6464	0.00789007	0.0307307	0.12417	0.8451	0.284888	0.00993347	0.705178	0.0784952	0.013522	0.907983	0.0294837	0.0872782	0.883238	0.296045	0.886593	0.116168	0.454132	0.0338577	0.0339178	0.471183	0.430105	0.831447	0.109692	0.0708446	0.833641	0.0955149	0.245991	0.132642	0.467294	0.154074	0.0174932	0.00180205	0.959455	0.0212502	0.166804	0.0538725	0.653
35	30120.2	0	1.66789	1.66349	-28035.4	2079.36	Standard of care	0.00738016	0.461278	30120.2	0.392196	55.0566	0.035083	0.0331915	0.141531	0.825278	0.276453	0.0519681	0.671579	0.0427765	0.0212269	0.935997	0.0191088	0.125411	0.85548	0.314972	0.583506	0.12554	0.552481	0.0249552	0.0249029	0.392309	0.461498	0.862924	0.0795099	0.083697	0.798388	0.117915	0.269297	0.172684	0.436224	0.121795	0.0548711	0.0118175	0.90463	0.0286813	0.142534	0.0670261	0.690929
36	30540.2	0	1.09627	1.09701	-29169.9	1371.26	Standard of care	0.0109997	0.461924	30540.2	0.471591	57.3661	0.0349127	0.116014	0.191199	0.692787	0.271855	0.028974	0.699171	0.0526771	0.0047549	0.942568	0.0123164	0.0643715	0.923312	0.309587	0.420602	0.124901	0.471252	0.0163561	0.0163781	0.47166	0.462448	0.834211	0.0980118	0.0897373	0.770545	0.139717	0.276596	0.149962	0.411879	0.161563	0.0844583	0.00159953	0.865904	0.0480385	0.120145	0.0585898	0.713913
37	31583.6	0	1.79117	1.79082	-29344.6	2238.52	Standard of care	0.0135971	0.428507	31583.6	0.424543	57.2319	0.00645824	0.0535195	0.143923	0.802557	0.232475	0.0384016	0.729123	0.0129061	0.0450304	0.942063	0.0230026	0.0695583	0.907439	0.301908	0.721082	0.117515	0.451045	0.0267801	0.026789	0.424663	0.429048	0.824517	0.0980528	0.0564903	0.755157	0.188353	0.22509	0.136111	0.50648	0.132319	0.107253	0.00286721	0.865687	0.0241933	0.14883	0.0539138	0.698128
38	30590.2	0	1.36962	1.3708	-28878.2	1713.49	Standard of care	0.0131802	0.444256	30590.2	0.455402	60.3932	0.025147	0.0485108	0.147499	0.803991	0.271996	0.00819464	0.719809	0.0157849	0.015622	0.968593	0.0150455	0.105461	0.879494	0.33015	0.595403	0.131195	0.472992	0.0204489	0.0204895	0.455426	0.444751	0.774603	0.109238	0.0626219	0.809153	0.128225	0.253968	0.159386	0.468341	0.118305	0.0436439	0.000941621	0.916042	0.0393727	0.0909115	0.149255	0.661916
39	31012.5	0	2.21607	2.22253	-28242.4	2778.17	Standard of care	0.00732641	0.407724	31012.5	0.527456	63.5574	0.0498623	0.0448586	0.0905331	0.864608	0.234317	0.0402248	0.725458	0.0109618	0.0817506	0.907288	0.0301534	0.0652853	0.904561	0.379455	0.329629	0.126102	0.502232	0.0331921	0.0332993	0.527517	0.407895	0.837999	0.117615	0.0407603	0.801885	0.157354	0.301342	0.164372	0.392493	0.141794	0.0661712	0.00919193	0.899718	0.0249188	0.191552	0.0581477	0.662123
40	29999.5	0	0.786668	0.784889	-29016.1	981.112	Standard of care	0.0114286	0.460996	29999.5	0.437199	55.2746	0.0426846	0.0308565	0.209901	0.759242	0.244324	0.0362348	0.719441	0.0213447	0.0156235	0.963032	0.00792241	0.0715712	0.920506	0.293118	0.916408	0.136809	0.438771	0.0116893	0.0116752	0.437287	0.461622	0.880226	0.060408	0.0944284	0.811115	0.0944562	0.235855	0.180908	0.475115	0.108122	0.0689447	0.0200714	0.848654	0.0623301	0.159598	0.0826974	0.69207
41	30757.9	0	2.23819	2.245	-27960.2	2806.25	Standard of care	0.0151787	0.420299	30757.9	0.504009	58.9535	0.00672502	0.0949187	0.19728	0.707801	0.228656	0.0155878	0.755757	0.0606143	0.00307153	0.936314	0.0291185	0.0733722	0.897509	0.311527	0.6743	0.142914	0.477716	0.0334616	0.0335821	0.504057	0.421076	0.891456	0.0620117	0.101847	0.764093	0.13406	0.21506	0.151692	0.502637	0.130611	0.0434741	0.0035433	0.924108	0.0288747	0.236211	0.0638521	0.618126
42	31063.4	0	1.77327	1.7715	-28846.8	2214.37	Standard of care	0.0115368	0.454435	31063.4	0.432463	56.3386	0.0468665	0.0143579	0.130804	0.854838	0.242722	0.0590731	0.698205	0.00897579	0.0146442	0.97638	0.0238525	0.0520966	0.924051	0.355158	0.432588	0.126017	0.444864	0.0265239	0.0265072	0.432614	0.454834	0.843649	0.0897047	0.116142	0.806562	0.0772963	0.29739	0.152048	0.437135	0.113427	0.0348296	0.0429033	0.893212	0.0290549	0.133853	0.0446272	0.772021
43	28267.2	0	2.69183	2.6949	-24902.4	3368.63	Standard of care	0.0100589	0.428532	28267.2	0.46238	55.1433	0.0544942	0.0529742	0.125944	0.821082	0.274305	0.0671471	0.658548	0.0130268	0.0746726	0.912301	0.0370945	0.061853	0.901053	0.407858	0.650161	0.118959	0.520171	0.0403055	0.0403619	0.462546	0.428838	0.853279	0.0664288	0.100848	0.785515	0.113637	0.284858	0.0991553	0.500593	0.115394	0.0318023	0.000809817	0.943259	0.0241288	0.133126	0.101842	0.6941
44	30672.3	0	3.32269	3.3186	-26518.9	4148.25	Standard of care	0.0139504	0.443359	30672.3	0.391899	55.4083	0.0361069	0.034917	0.227803	0.73728	0.212967	0.0176377	0.769396	0.0234005	0.0160745	0.960525	0.0474388	0.0442357	0.908326	0.299583	0.796313	0.130409	0.452257	0.0497285	0.0496754	0.391957	0.444201	0.852163	0.0877834	0.0361516	0.843646	0.120202	0.274296	0.187122	0.411635	0.126947	0.107534	0.000802934	0.824816	0.0668476	0.208413	0.0883101	0.646868
45	29218.1	0	2.77634	2.77235	-25747.7	3465.44	Standard of care	0.0125754	0.424397	29218.1	0.392721	58.1804	0.0212757	0.0324265	0.15772	0.809853	0.30693	0.068152	0.624918	0.0169642	0.0256348	0.957401	0.0385759	0.049608	0.911816	0.345128	0.793733	0.130919	0.514745	0.0415647	0.0415143	0.392954	0.424878	0.791859	0.148056	0.0642914	0.795919	0.139789	0.302533	0.166263	0.387915	0.14329	0.0343791	0.0134612	0.925224	0.0269352	0.178477	0.0898086	0.568149
46	30135	0	2.31882	2.31937	-27236.5	2899.21	Standard of care	0.010428	0.4398	30135	0.446118	60.6009	0.0327327	0.0175326	0.159257	0.82321	0.266974	0.0147781	0.718248	0.0238258	0.0123103	0.963864	0.0324043	0.0421293	0.925466	0.374912	0.645408	0.129519	0.512867	0.0347248	0.0347402	0.446156	0.440195	0.843408	0.089238	0.104241	0.758345	0.137415	0.304039	0.161118	0.464581	0.0702625	0.0672599	0.000162174	0.910835	0.0217425	0.0975921	0.0451687	0.738883
47	30915.3	0	1.37157	1.37512	-29200.8	1718.9	Standard of care	0.0103529	0.426061	30915.3	0.463069	59.9989	0.0185482	0.0456293	0.168702	0.785669	0.285498	0.00739271	0.707109	0.0177663	0.0313922	0.950841	0.0161209	0.0844039	0.899475	0.300101	0.716748	0.145502	0.524833	0.0205007	0.0205688	0.463087	0.426468	0.842533	0.116006	0.0470143	0.857183	0.0958026	0.163524	0.266943	0.441154	0.128379	0.0381817	0.000870095	0.914088	0.0468601	0.122689	0.0836403	0.659611
48	30395.8	0	2.01584	2.01511	-27876	2518.88	Standard of care	0.0127229	0.433789	30395.8	0.424588	58.5272	0.0176003	0.0639104	0.143772	0.792317	0.196287	0.0600115	0.743702	0.0225901	0.0129571	0.964453	0.0279768	0.032682	0.939341	0.314598	0.355463	0.135787	0.533708	0.0301688	0.0301643	0.42479	0.434207	0.826352	0.101464	0.0759747	0.826084	0.0979413	0.182967	0.160134	0.534634	0.122264	0.0580357	0.00518638	0.898933	0.0378447	0.122341	0.0476284	0.720854
49	29872.5	0	0.850742	0.853856	-28809.1	1067.32	Standard of care	0.00871536	0.446066	29872.5	0.483905	59.3644	0.0510337	0.0308849	0.196483	0.772633	0.332184	0.0260701	0.641746	0.0534127	0.0229422	0.923645	0.00733245	0.107533	0.885134	0.330577	0.757428	0.138648	0.51014	0.0126674	0.0127299	0.483957	0.446466	0.83163	0.0993039	0.103647	0.774372	0.121981	0.244919	0.154753	0.484435	0.115893	0.0295435	0.000795748	0.938097	0.031564	0.0951076	0.10624	0.743751
50	29829.9	0	2.24604	2.24769	-27022.4	2809.61	Standard of care	0.0103795	0.450341	29829.9	0.476523	60.5001	0.0210284	0.0345283	0.107123	0.858349	0.227107	0.0318585	0.741034	0.026936	0.0465948	0.926469	0.030842	0.0561663	0.912992	0.394172	0.579279	0.137258	0.45829	0.033636	0.033671	0.476592	0.450626	0.723916	0.155461	0.0840006	0.827274	0.0887257	0.216137	0.19324	0.487374	0.103249	0.0166322	0.00624517	0.924214	0.0529085	0.137219	0.062791	0.724694
51	32378.3	0	1.17792	1.17434	-30905.9	1467.93	Standard of care	0.00880936	0.509794	32378.3	0.456778	61.0202	0.0359443	0.0523638	0.200146	0.74749	0.260817	0.0859556	0.653227	0.0396965	0.007826	0.952478	0.0143902	0.0582491	0.927361	0.305055	0.23416	0.146916	0.510096	0.0175893	0.0175448	0.456957	0.510155	0.883407	0.0437238	0.0615863	0.77431	0.164103	0.294756	0.115998	0.452236	0.13701	0.0456562	0.000703676	0.936012	0.0176286	0.101471	0.0635607	0.761042
52	31950	0	1.40033	1.40346	-30199.6	1754.32	Standard of care	0.0107231	0.40963	31950	0.445799	59.2022	0.00592396	0.0396985	0.254163	0.706138	0.285495	0.0358739	0.678632	0.0369608	0.0234443	0.939595	0.0163672	0.0876218	0.896011	0.359201	0.796314	0.137014	0.487138	0.0209001	0.020961	0.445889	0.410342	0.797951	0.121763	0.0746571	0.818111	0.107232	0.188128	0.183398	0.505837	0.122637	0.0572635	0.00167562	0.900664	0.0403973	0.200342	0.0570836	0.670762
53	29285.8	0	1.19044	1.19148	-27797.8	1489.34	Standard of care	0.0100945	0.452377	29285.8	0.464258	55.4875	0.0357712	0.0425462	0.143761	0.813693	0.293204	0.0409696	0.665827	0.0175212	0.0185842	0.963895	0.0138602	0.0747924	0.911347	0.378936	0.434142	0.141853	0.467735	0.0177821	0.0178103	0.464347	0.45274	0.847544	0.0295309	0.0683651	0.768445	0.163189	0.274212	0.100338	0.544769	0.080681	0.0515315	0.00995026	0.834419	0.104099	0.174949	0.083156	0.684344
54	29075.5	0	2.71115	2.71145	-25686.5	3389.31	Standard of care	0.00819847	0.432294	29075.5	0.437948	56.8006	0.0565308	0.0416098	0.111716	0.846675	0.216578	0.0198791	0.763543	0.0204983	0.0110946	0.968407	0.0369367	0.080261	0.882802	0.379382	0.887603	0.127696	0.49549	0.0406156	0.0406308	0.437987	0.432523	0.843012	0.0552314	0.0506397	0.763154	0.186206	0.251335	0.178949	0.475168	0.0945475	0.0374541	0.0217967	0.891208	0.0495411	0.125962	0.10275	0.716596
55	30870	0	2.11013	2.11455	-28232.3	2643.19	Standard of care	0.00812052	0.403902	30870	0.463795	61.0187	0.0336401	0.0348431	0.270503	0.694654	0.310358	0.0197079	0.669934	0.0221975	0.0542671	0.923535	0.0282637	0.0659805	0.905756	0.379878	0.464196	0.115267	0.478344	0.0315656	0.0316406	0.463832	0.404506	0.824877	0.0847596	0.085733	0.820198	0.0940692	0.229223	0.176002	0.450749	0.144025	0.0334369	0.00494264	0.928076	0.0335441	0.0995982	0.0723019	0.718964
56	29726.8	0	1.41009	1.41236	-27964.2	1765.45	Standard of care	0.00908812	0.453329	29726.8	0.485322	57.0157	0.0272024	0.0240177	0.166033	0.809949	0.252361	0.0301733	0.717466	0.0160148	0.0427302	0.941255	0.0179867	0.0618458	0.920168	0.371301	0.623114	0.137397	0.49979	0.0210845	0.0211286	0.485383	0.453685	0.833593	0.110752	0.0793295	0.815101	0.10557	0.241727	0.12018	0.485149	0.152944	0.0500594	7.47042e-05	0.914496	0.0353703	0.129489	0.123942	0.696721
57	28947.7	0	1.70312	1.70636	-26818.8	2132.95	Standard of care	0.00777853	0.431962	28947.7	0.47938	60.0532	0.0528878	0.0119212	0.144862	0.843217	0.301381	0.0425271	0.656092	0.0293832	0.0260717	0.944545	0.0190488	0.143568	0.837383	0.335202	0.665935	0.13482	0.486427	0.0254576	0.0255257	0.479453	0.432247	0.829621	0.101192	0.0972782	0.800024	0.102698	0.204503	0.1078	0.584802	0.102895	0.050544	1.56848e-05	0.907864	0.0415761	0.115763	0.125047	0.705368
58	30407.3	0	2.09256	2.09498	-27791.6	2618.73	Standard of care	0.01153	0.418848	30407.3	0.454007	60.4167	0.0219416	0.0591597	0.144961	0.795879	0.234072	0.0216316	0.744296	0.0560376	0.0336034	0.910359	0.026679	0.0909538	0.882367	0.376382	0.600385	0.125696	0.506399	0.031312	0.0313651	0.454068	0.419267	0.815247	0.126591	0.0945801	0.772595	0.132825	0.233782	0.215693	0.45322	0.097305	0.0243537	0.00296963	0.906833	0.0658435	0.110654	0.0943003	0.656627
59	28825.2	0	3.34597	3.35142	-24642.7	4189.27	Standard of care	0.0187708	0.405224	28825.2	0.433399	59.5711	0.0134532	0.029841	0.142845	0.827314	0.307013	0.0157976	0.67719	0.0101711	0.023422	0.966407	0.0459735	0.0727117	0.881315	0.386002	0.814044	0.144355	0.523217	0.050087	0.0501907	0.433475	0.405875	0.796098	0.115778	0.0515766	0.804734	0.14369	0.19349	0.152836	0.513665	0.140009	0.0515602	0.0031453	0.851643	0.0936518	0.141815	0.097238	0.625717
60	31589.8	0	2.10041	2.09663	-28964.3	2620.79	Standard of care	0.0131595	0.445736	31589.8	0.409472	59.8504	0.0198472	0.0332452	0.127353	0.839402	0.246424	0.0301031	0.723473	0.00618192	0.0155294	0.978289	0.0269454	0.0895608	0.883494	0.347682	0.86069	0.137076	0.495024	0.0314278	0.0313892	0.409572	0.446141	0.743368	0.189589	0.0727173	0.837389	0.0898935	0.266138	0.23361	0.389882	0.11037	0.0540099	0.00169362	0.920972	0.0233243	0.151719	0.0757577	0.679967
61	31420.3	0	1.33429	1.33436	-29752.4	1667.96	Standard of care	0.00533975	0.433601	31420.3	0.4359	56.7386	0.00588065	0.0385876	0.12194	0.839472	0.212182	0.045111	0.742707	0.00934025	0.0346411	0.956019	0.0166839	0.0725327	0.910783	0.345847	0.456102	0.126738	0.47642	0.019985	0.0199923	0.435956	0.43377	0.727768	0.190751	0.0470875	0.816228	0.136685	0.252962	0.108652	0.486503	0.151882	0.0442386	0.00179096	0.906914	0.0470561	0.174652	0.0795112	0.686858
62	28675.2	0	1.06283	1.06597	-27346.7	1332.46	Standard of care	0.00917302	0.472251	28675.2	0.518041	61.5468	0.0558309	0.0482525	0.175147	0.776601	0.270789	0.0532001	0.676011	0.0329147	0.0231233	0.943962	0.0123684	0.0669308	0.920701	0.399168	0.832733	0.125335	0.469038	0.0158579	0.0159158	0.518137	0.472645	0.813823	0.148048	0.0661181	0.80198	0.131902	0.329914	0.106967	0.431326	0.131793	0.0258176	0.00873745	0.922721	0.042724	0.164212	0.0710898	0.679206
63	32617.8	0	1.1695	1.16122	-31155.9	1451.53	Standard of care	0.0143533	0.470967	32617.8	0.404276	57.3602	0.00650619	0.0169155	0.121627	0.861458	0.317899	0.0461356	0.635966	0.037186	0.0296344	0.93318	0.0130476	0.0763526	0.9106	0.352102	0.712835	0.117057	0.461923	0.0174578	0.0173503	0.404437	0.471406	0.830199	0.0792846	0.082986	0.743899	0.173115	0.296241	0.141256	0.40564	0.156863	0.0174793	0.000255488	0.908447	0.0738179	0.180558	0.121732	0.633907
64	31658.2	0	1.63181	1.63582	-29618.4	2044.78	Standard of care	0.0127264	0.443224	31658.2	0.477643	58.9818	0.0374545	0.0223652	0.175016	0.802619	0.298758	0.0655948	0.635647	0.0309408	0.032786	0.936273	0.0211614	0.0548071	0.924031	0.312302	0.640453	0.133639	0.510089	0.0243775	0.0244492	0.477836	0.44375	0.824993	0.0606996	0.0653673	0.817224	0.117409	0.262898	0.142423	0.457518	0.137162	0.0432501	0.00017832	0.945765	0.0108069	0.209407	0.0466213	0.625673
65	31146.7	0	2.94956	2.94802	-27459.7	3685.03	Standard of care	0.0126789	0.434432	31146.7	0.420145	55.311	0.0257099	0.0368825	0.0836554	0.879462	0.25162	0.0358528	0.712527	0.0105973	0.00993437	0.979468	0.0408589	0.064472	0.894669	0.340452	0.896371	0.136604	0.526147	0.0441944	0.0441846	0.420264	0.434678	0.761099	0.130441	0.0686187	0.791073	0.140309	0.265664	0.0917582	0.499137	0.143441	0.0380413	0.00626947	0.891193	0.0644967	0.0974215	0.0841828	0.773867
66	31361.8	0	1.41158	1.4154	-29597.3	1769.25	Standard of care	0.00649828	0.446018	31361.8	0.517246	63.2594	0.0398349	0.0653312	0.133117	0.801552	0.249557	0.0646519	0.685791	0.0164535	0.0100071	0.973539	0.018289	0.0567163	0.924995	0.309328	0.92534	0.124658	0.523853	0.0211298	0.0211932	0.517339	0.446218	0.715339	0.100758	0.0583131	0.862917	0.0787694	0.268695	0.187447	0.433188	0.110669	0.0291786	4.81328e-05	0.959454	0.0113193	0.167962	0.0441952	0.733009
67	29597.8	0	1.29762	1.29668	-27975.7	1620.85	Standard of care	0.00625451	0.434137	29597.8	0.417081	58.4139	0.0546541	0.016154	0.232137	0.751709	0.29854	0.0277518	0.673708	0.0194142	0.0206726	0.959913	0.0159198	0.0728932	0.911187	0.412514	0.820786	0.130523	0.473684	0.0193951	0.0193877	0.417123	0.434513	0.720427	0.209272	0.0915756	0.734295	0.17413	0.219496	0.175871	0.490725	0.113908	0.0226383	0.00326323	0.947281	0.0268173	0.137607	0.0677642	0.653147
68	29333.4	0	1.55592	1.55223	-27388.5	1940.28	Standard of care	0.00819322	0.450305	29333.4	0.384249	58.7846	0.0228269	0.0531481	0.122006	0.824846	0.272179	0.0176441	0.710177	0.0231591	0.020022	0.956819	0.0179875	0.11231	0.869702	0.317335	0.84311	0.130074	0.413482	0.0232819	0.0232392	0.384281	0.450585	0.856418	0.0565937	0.0595053	0.804467	0.136028	0.265426	0.17625	0.479884	0.07844	0.0299517	0.00989883	0.898668	0.0614819	0.122447	0.0545107	0.759513
69	31503.4	0	2.83667	2.83404	-27957.5	3542.55	Standard of care	0.0129082	0.457378	31503.4	0.430034	58.1586	0.0388195	0.0554589	0.13399	0.810551	0.281822	0.0378058	0.680372	0.0423539	0.0258841	0.931762	0.0383701	0.0768464	0.884784	0.335429	0.697123	0.120425	0.4663	0.0424662	0.0424421	0.430148	0.457819	0.784921	0.174202	0.0631908	0.801142	0.135667	0.270436	0.124452	0.443505	0.161607	0.0606569	0.000533718	0.901181	0.0376282	0.197108	0.0319641	0.696828
70	30876.6	0	2.73489	2.73647	-27458	3420.59	Standard of care	0.0132422	0.45462	30876.6	0.47309	59.6842	0.0493496	0.0268635	0.170747	0.80239	0.219925	0.00957029	0.770505	0.0158639	0.0305409	0.953595	0.0383274	0.0525368	0.909136	0.412557	0.483107	0.121005	0.480138	0.0409331	0.0409688	0.473118	0.455183	0.824074	0.143611	0.0805538	0.789802	0.129644	0.182747	0.225946	0.518505	0.0728015	0.035436	0.00417377	0.926755	0.0336348	0.11787	0.115286	0.69773
71	30148.8	0	3.41723	3.41726	-25877.2	4271.57	Standard of care	0.00874102	0.451276	30148.8	0.45197	58.3713	0.0362553	0.091536	0.170879	0.737585	0.222114	0.0289279	0.748958	0.0577731	0.0224184	0.919808	0.0484608	0.051892	0.899647	0.325097	0.718136	0.143032	0.497905	0.051204	0.0512114	0.452029	0.451629	0.849281	0.0674969	0.0887227	0.79938	0.111897	0.337519	0.167415	0.387374	0.107692	0.0260605	0.00241232	0.902895	0.0686325	0.151579	0.095106	0.713406
72	29731	0	2.95814	2.95874	-26033.3	3698.42	Standard of care	0.00571544	0.428889	29731	0.440441	61.8749	0.0417085	0.0617617	0.118323	0.819915	0.302464	0.0736373	0.623899	0.0216984	0.0229327	0.955369	0.0393116	0.111509	0.84918	0.352081	0.532814	0.131394	0.484395	0.044323	0.0443421	0.44054	0.429062	0.851455	0.110262	0.0782483	0.765186	0.156565	0.298395	0.0899269	0.509604	0.102074	0.0247915	0.0213741	0.931976	0.0218583	0.129879	0.0722955	0.691056
73	31999.6	0	1.69301	1.69285	-29883.3	2116.06	Standard of care	0.0132803	0.438525	31999.6	0.437003	57.4319	0.0544218	0.0148892	0.17291	0.812201	0.253506	0.0548842	0.691609	0.017683	0.012274	0.970043	0.0224266	0.0511447	0.926429	0.389106	0.720135	0.137597	0.488096	0.025294	0.0253025	0.437175	0.439095	0.761097	0.143363	0.0749601	0.827677	0.0973631	0.292175	0.119844	0.426096	0.161885	0.0464619	0.00303066	0.907792	0.0427155	0.130826	0.0780313	0.737344
74	29620.3	0	2.64194	2.63597	-26317.9	3294.96	Standard of care	0.0125069	0.454288	29620.3	0.390809	55.4884	0.0467992	0.0682603	0.15544	0.776299	0.247545	0.056665	0.69579	0.0183089	0.0146476	0.967044	0.0370432	0.0384192	0.924538	0.331711	0.661676	0.132572	0.486902	0.0395509	0.0394691	0.390991	0.45476	0.881577	0.0725441	0.141299	0.761226	0.0974755	0.33194	0.128932	0.458944	0.0801837	0.0679103	0.0100251	0.881112	0.0409528	0.161515	0.0507391	0.713211
75	32852.6	0	1.34835	1.34716	-31167.1	1683.95	Standard of care	0.0182499	0.42144	32852.6	0.411333	60.5834	0.0101853	0.0230422	0.105915	0.871042	0.270697	0.0225963	0.706707	0.0743612	0.0187769	0.906862	0.0141934	0.10486	0.880946	0.315918	0.661871	0.129888	0.495245	0.0201269	0.0201377	0.411438	0.421932	0.850206	0.0601376	0.0441516	0.843204	0.112644	0.149273	0.218834	0.521029	0.110864	0.0127472	1.24127e-07	0.939291	0.0479622	0.167993	0.0799491	0.682165
76	30259.8	0	3.42348	3.42932	-25980.4	4286.65	Standard of care	0.0195762	0.43697	30259.8	0.473031	60.2283	0.021885	0.0631061	0.179469	0.757425	0.274718	0.034857	0.690425	0.0348421	0.0150811	0.950077	0.0478666	0.0507963	0.901337	0.367329	0.531521	0.140863	0.515902	0.0512248	0.0513285	0.47319	0.437792	0.816512	0.0908757	0.110831	0.793817	0.0953521	0.296064	0.0585119	0.470679	0.174746	0.0807409	0.0112288	0.849575	0.058455	0.142007	0.0287689	0.741088
77	29953.5	0	2.48044	2.47097	-26852.9	3088.71	Standard of care	0.0130245	0.487648	29953.5	0.395686	58.2225	0.0336706	0.0404994	0.156732	0.802768	0.311913	0.0110926	0.676995	0.0441496	0.042375	0.913475	0.0337525	0.0567663	0.909481	0.317087	0.750324	0.129403	0.447361	0.0371219	0.0369891	0.39572	0.488151	0.897475	0.0807136	0.0982665	0.815441	0.0862922	0.201139	0.192151	0.484539	0.122171	0.0176148	8.87472e-05	0.934874	0.0474227	0.144301	0.0490559	0.696974
78	29290.2	0	3.7745	3.77756	-24572	4721.95	Standard of care	0.0195063	0.432712	29290.2	0.467191	60.9935	0.0441082	0.0727533	0.17099	0.756256	0.236968	0.0486947	0.714337	0.0775631	0.0312688	0.891168	0.0531487	0.053856	0.892995	0.329117	0.600396	0.123074	0.425963	0.0564701	0.056532	0.46738	0.433664	0.851458	0.0947854	0.0735862	0.762395	0.164019	0.233526	0.131722	0.536612	0.0981398	0.0241721	0.000963782	0.933898	0.0409657	0.156891	0.0533539	0.677769
79	29384	0	1.43383	1.43341	-27591.7	1791.76	Standard of care	0.0111856	0.429159	29384	0.424978	61.1006	0.0534428	0.0180544	0.140873	0.841073	0.316173	0.00887239	0.674954	0.0306925	0.00900275	0.960305	0.0165704	0.0953502	0.888079	0.367968	0.759282	0.124691	0.478131	0.0214218	0.0214321	0.425002	0.42957	0.722974	0.105578	0.0755375	0.832192	0.0922703	0.289491	0.122663	0.483433	0.104412	0.0155714	0.000264198	0.919736	0.0644284	0.0823422	0.155635	0.685003
80	28967.2	0	2.60722	2.60959	-25708.2	3261.99	Standard of care	0.0108299	0.435355	28967.2	0.475443	63.3693	0.0211571	0.0580318	0.165715	0.776253	0.186752	0.0935789	0.719669	0.0160837	0.0392461	0.94467	0.0367159	0.0449639	0.91832	0.38608	0.739964	0.120605	0.471968	0.0390278	0.0390708	0.475664	0.435825	0.826264	0.0793218	0.12642	0.726967	0.146613	0.227742	0.169176	0.475519	0.127563	0.0250484	0.00216655	0.930644	0.0421414	0.146717	0.11814	0.632783
81	29146.9	0	1.47448	1.47636	-27303.8	1845.45	Standard of care	0.013326	0.47671	29146.9	0.505279	59.7932	0.0505256	0.0331714	0.187623	0.779205	0.199007	0.0379488	0.763044	0.0209918	0.0121443	0.966864	0.0180366	0.0817448	0.900219	0.329399	0.73162	0.125341	0.414472	0.0219896	0.0220369	0.50537	0.47738	0.817734	0.114913	0.0603943	0.795978	0.143628	0.186609	0.236822	0.47776	0.0988096	0.0318832	0.000296651	0.93441	0.0334098	0.144587	0.102294	0.717684
82	28600.6	0	0.811213	0.811363	-27586.5	1014.2	Standard of care	0.0105567	0.431452	28600.6	0.434013	59.6617	0.0566121	0.0720404	0.169073	0.758886	0.181342	0.0166542	0.802004	0.0225367	0.0326922	0.944771	0.00845236	0.0669964	0.924551	0.306343	0.606565	0.132967	0.529897	0.0120855	0.0120986	0.434059	0.431865	0.834765	0.107996	0.0304008	0.727597	0.242002	0.236936	0.144745	0.509382	0.108937	0.0196898	0.000655157	0.917476	0.0621796	0.194072	0.0653184	0.675844
83	28624.6	0	2.15998	2.15032	-25924.6	2687.9	Standard of care	0.0166702	0.478013	28624.6	0.426612	62.2552	0.0179304	0.0897646	0.0881581	0.822077	0.344682	0.0637985	0.59152	0.019957	0.00811857	0.971924	0.026957	0.0813975	0.891645	0.33722	0.608531	0.127845	0.516754	0.0323163	0.0321942	0.426887	0.478337	0.847359	0.0824644	0.0745962	0.817971	0.107433	0.231338	0.171028	0.504506	0.0931277	0.0347823	0.00710266	0.916247	0.041868	0.151098	0.103963	0.633892
84	32024	0	3.31988	3.31543	-27874.2	4144.29	Standard of care	0.0162097	0.462026	32024	0.420701	54.9549	0.0539838	0.060373	0.209882	0.729746	0.245372	0.0191822	0.735446	0.0228833	0.0111972	0.965919	0.0436159	0.124863	0.831521	0.330604	0.780677	0.125267	0.449634	0.0496355	0.049598	0.420772	0.462908	0.851423	0.068937	0.122873	0.730869	0.146258	0.268805	0.0846193	0.528002	0.118573	0.0241617	0.0142177	0.9189	0.0427204	0.179735	0.0564281	0.705488
85	29463.3	0	1.97272	1.97101	-26997.4	2463.76	Standard of care	0.0132364	0.47758	29463.3	0.462129	58.7105	0.056933	0.0420524	0.136106	0.821841	0.304893	0.0343643	0.660743	0.033457	0.0218933	0.94465	0.0249723	0.0846442	0.890383	0.302843	0.707876	0.133432	0.463242	0.0294901	0.0294831	0.462228	0.478018	0.723989	0.120805	0.0871468	0.751966	0.160887	0.211439	0.140327	0.528585	0.119649	0.0441467	0.00174772	0.880859	0.0732463	0.143637	0.115128	0.690307
86	30955.7	0	1.98266	1.98573	-28477.4	2482.17	Standard of care	0.0181222	0.447362	30955.7	0.474249	58.4987	0.0449144	0.083752	0.146578	0.76967	0.254572	0.0350569	0.710371	0.0494682	0.0121086	0.938423	0.0249706	0.0728889	0.90214	0.34409	0.833147	0.137667	0.459454	0.0296129	0.0296805	0.474381	0.448046	0.825009	0.103127	0.0625419	0.779471	0.157987	0.308355	0.0957367	0.496739	0.0991701	0.0292917	0.0174853	0.92701	0.0262129	0.179138	0.0672009	0.634835
87	29853.5	0	1.35109	1.35136	-28164.6	1689.2	Standard of care	0.0175386	0.45648	29853.5	0.459495	61.9329	0.0229979	0.0141534	0.13571	0.850136	0.223106	0.0262079	0.750686	0.0689658	0.0151323	0.915902	0.0138979	0.123609	0.862493	0.351378	0.511023	0.116942	0.501302	0.0201409	0.0201811	0.459605	0.45705	0.839983	0.139219	0.0563145	0.806967	0.136718	0.289546	0.136905	0.490663	0.0828861	0.025598	2.32313e-07	0.888674	0.0857281	0.178964	0.084902	0.698727
88	29710.8	0	1.06634	1.06656	-28377.9	1333.2	Standard of care	0.00591157	0.436773	29710.8	0.441259	62.9929	0.00983239	0.0317484	0.126527	0.841725	0.271124	0.0281671	0.700709	0.0171549	0.0118047	0.97104	0.012268	0.0784178	0.909314	0.319138	0.806272	0.116646	0.494407	0.0159617	0.0159726	0.441299	0.436961	0.84748	0.108065	0.0426378	0.802174	0.155188	0.253915	0.187154	0.460888	0.0980429	0.0478199	0.00288722	0.867925	0.0813679	0.18377	0.0374104	0.685753
89	28050.3	0	2.43894	2.44038	-25001.6	3050.47	Standard of care	0.00824882	0.402932	28050.3	0.441475	61.4209	0.0288593	0.0415433	0.108574	0.849883	0.167694	0.0295136	0.802793	0.0309155	0.0319426	0.937142	0.0324448	0.0916556	0.8759	0.362222	0.838789	0.124838	0.499524	0.0365349	0.0365688	0.441535	0.403167	0.831295	0.0998123	0.0589846	0.75141	0.189606	0.254879	0.124379	0.505389	0.115353	0.0522563	0.00584577	0.921375	0.0205229	0.0912735	0.0324705	0.777241
90	30141.4	0	1.40732	1.41071	-28382.2	1763.38	Standard of care	0.010866	0.436007	30141.4	0.48785	53.5965	0.00741076	0.00980893	0.200851	0.78934	0.239518	0.0626882	0.697794	0.0438771	0.0387736	0.917349	0.0176166	0.068957	0.913426	0.294035	0.816912	0.127633	0.45834	0.0210162	0.0210793	0.487989	0.436589	0.880444	0.0776059	0.0887739	0.821341	0.0898852	0.233602	0.16318	0.488754	0.114464	0.0180366	0.00189063	0.928	0.0520724	0.171636	0.157383	0.574128
91	29048.7	0	3.59599	3.598	-24553.7	4497.5	Standard of care	0.0115186	0.435924	29048.7	0.45992	57.3731	0.0136143	0.0547106	0.14076	0.80453	0.2427	0.0213434	0.735957	0.015185	0.0201501	0.964665	0.0501801	0.0779876	0.871832	0.380195	0.78749	0.139654	0.48197	0.0538765	0.0539217	0.459975	0.436331	0.790792	0.103786	0.105521	0.737885	0.156595	0.224613	0.150713	0.488965	0.135709	0.0557934	0.00341966	0.924303	0.0164842	0.152965	0.0986768	0.646119
92	29703.4	0	0.537717	0.532724	-29031.3	665.905	Standard of care	0.00842472	0.480545	29703.4	0.416985	55.4153	0.0492242	0.0449036	0.128571	0.826525	0.310795	0.028904	0.660301	0.0246699	0.0136033	0.961727	0.00402973	0.0740622	0.921908	0.340125	0.48482	0.147513	0.488799	0.00800369	0.00793854	0.417044	0.48079	0.802869	0.12049	0.0628339	0.78114	0.156026	0.279834	0.158999	0.431704	0.129462	0.0377318	0.0113698	0.885927	0.0649711	0.182096	0.150112	0.56364
93	30252.8	0	1.2411	1.24039	-28701.5	1550.49	Standard of care	0.0073371	0.465707	30252.8	0.453598	55.4834	0.0397314	0.0315771	0.226598	0.741825	0.272025	0.0297571	0.698218	0.0521604	0.053265	0.894575	0.0148771	0.0728426	0.91228	0.3037	0.830084	0.123792	0.551532	0.0185469	0.0185444	0.453656	0.466056	0.759743	0.176652	0.0735389	0.830744	0.095717	0.312825	0.176716	0.441236	0.0692231	0.0478456	0.0207239	0.876469	0.054962	0.142583	0.0691279	0.688795
94	30894.7	0	2.23694	2.23689	-28098.5	2796.11	Standard of care	0.0113265	0.426711	30894.7	0.425832	57.8924	0.0330611	0.0488157	0.0997711	0.851413	0.223118	0.0329716	0.743911	0.0430768	0.0128823	0.944041	0.0291562	0.0885055	0.882338	0.314994	0.366142	0.126096	0.452813	0.03349	0.0335048	0.425917	0.427021	0.821977	0.0929474	0.0796256	0.80078	0.119594	0.267016	0.202044	0.432637	0.0983031	0.0579319	0.00023096	0.87087	0.0709669	0.142607	0.0805469	0.716223
95	29637.3	0	4.60929	4.60941	-23875.7	5761.77	Standard of care	0.0132141	0.463866	29637.3	0.465373	60.0996	0.0524981	0.0307467	0.216313	0.752941	0.235191	0.0255793	0.739229	0.0380778	0.0392652	0.922657	0.0636836	0.123219	0.813098	0.394702	0.615846	0.122739	0.493484	0.0690035	0.0690314	0.465452	0.464547	0.815052	0.104965	0.0642596	0.78889	0.14685	0.293409	0.136072	0.465631	0.104888	0.0246182	0.00345353	0.929333	0.0425949	0.131749	0.0368599	0.778288
96	30393.7	0	0.526425	0.524014	-29735.7	655.018	Standard of care	0.0137502	0.449482	30393.7	0.41637	60.1441	0.04125	0.0418072	0.170062	0.788131	0.173717	0.0551168	0.771166	0.0101359	0.0261726	0.963692	0.00428875	0.062674	0.933037	0.385659	0.437747	0.120982	0.481654	0.00778498	0.00776202	0.416557	0.450069	0.830735	0.121071	0.090827	0.794311	0.114862	0.236657	0.163135	0.473246	0.126962	0.0329388	0.00332345	0.825795	0.137943	0.138595	0.0969166	0.63204
97	30008.7	0	2.32964	2.33201	-27096.6	2915.01	Standard of care	0.0104951	0.435292	30008.7	0.470711	60.5736	0.0463563	0.0618793	0.191013	0.747108	0.201574	0.0612404	0.737186	0.0196883	0.018094	0.962218	0.0322844	0.048323	0.919393	0.362738	0.753168	0.124519	0.518638	0.034864	0.0349075	0.470866	0.435769	0.854472	0.0626814	0.034133	0.866592	0.0992748	0.296442	0.153866	0.451677	0.0980152	0.0571897	0.00825312	0.857884	0.0766727	0.100862	0.0638721	0.765309
98	30439.6	0	3.47231	3.46073	-26099.2	4325.91	Standard of care	0.0150041	0.460575	30439.6	0.397114	60.1154	0.0229925	0.0608896	0.147115	0.791996	0.378104	0.0769689	0.544927	0.0341034	0.0135179	0.952379	0.0482045	0.0533496	0.898446	0.394581	0.599964	0.1232	0.52559	0.051994	0.0518336	0.397435	0.46107	0.795437	0.0907297	0.0616018	0.834367	0.104031	0.267894	0.18454	0.44958	0.0979858	0.0580191	0.00175601	0.912943	0.0272824	0.157116	0.042289	0.748063
99	31669.9	0	0.793952	0.806842	-30677.5	1008.55	Standard of care	0.0266926	0.42971	31669.9	0.489	60.4212	0.0206099	0.0151065	0.130133	0.854761	0.292205	0.0282505	0.679544	0.0297453	0.0102256	0.960029	0.00634058	0.081985	0.911674	0.299812	0.735576	0.124768	0.465204	0.0117396	0.0119719	0.489157	0.430637	0.774222	0.136985	0.0651618	0.809636	0.125202	0.249557	0.15843	0.472705	0.119308	0.0593621	0.00221128	0.91331	0.025117	0.188021	0.048168	0.650622
100	30793.6	0	1.51798	1.51735	-28896.1	1896.68	Standard of care	0.0105361	0.463175	30793.6	0.454691	58.5164	0.0310345	0.0555236	0.153523	0.790954	0.261373	0.0281963	0.710431	0.0397539	0.027165	0.933081	0.0166102	0.125729	0.857661	0.362009	0.717121	0.119418	0.479801	0.022679	0.0226908	0.45476	0.463573	0.781684	0.176723	0.0352324	0.862811	0.101957	0.286886	0.0984106	0.467893	0.14681	0.0513057	0.000466447	0.915461	0.032767	0.134091	0.0911755	0.691019
101	29710.9	0	2.19777	2.19492	-26963.7	2743.65	Standard of care	0.0149104	0.467442	29710.9	0.440312	58.3966	0.0152279	0.0292141	0.190516	0.78027	0.26708	0.063048	0.669872	0.0361088	0.0391207	0.92477	0.0294943	0.0594854	0.91102	0.340366	0.784998	0.1329	0.455879	0.0328434	0.0328145	0.44052	0.468155	0.854698	0.0971958	0.0739274	0.788344	0.137729	0.260538	0.157315	0.503891	0.0782567	0.0410809	0.00802199	0.880933	0.0699643	0.23026	0.0731905	0.621139
102	31999.9	0	0.778831	0.781213	-31026.4	976.516	Standard of care	0.0113386	0.4232	31999.9	0.443777	57.5087	0.0337697	0.128019	0.175074	0.696908	0.32197	0.0432543	0.634776	0.0171117	0.00720459	0.975684	0.00781884	0.0511242	0.941057	0.315327	0.775025	0.123481	0.499883	0.0116012	0.0116455	0.443897	0.423702	0.877184	0.0806197	0.097962	0.831725	0.0703133	0.259815	0.130516	0.477382	0.132286	0.0134191	2.05828e-07	0.949472	0.0371088	0.13088	0.0523615	0.739718
103	32333.8	0	1.67573	1.67598	-30239.1	2094.98	Standard of care	0.00544132	0.448413	32333.8	0.452995	58.2114	0.00580963	0.0782733	0.194542	0.727185	0.326841	0.0344064	0.638753	0.0122047	0.00442272	0.983373	0.0205342	0.0970121	0.882454	0.34037	0.535139	0.125771	0.485915	0.0250958	0.025108	0.453038	0.448675	0.817268	0.100209	0.0840133	0.739426	0.17656	0.296247	0.139537	0.49014	0.0740756	0.037183	0.00568433	0.903763	0.0533698	0.153232	0.0479107	0.72801
104	29852.9	0	1.18378	1.18113	-28373.2	1476.41	Standard of care	0.0117059	0.456955	29852.9	0.43355	60.852	0.013983	0.0342289	0.150272	0.815499	0.330282	0.0396518	0.630066	0.0327585	0.0137092	0.953532	0.0125405	0.0962904	0.891169	0.385781	0.732954	0.122786	0.487595	0.0176739	0.017652	0.433662	0.457384	0.769482	0.0959616	0.0871719	0.825835	0.0869935	0.263178	0.204799	0.421823	0.1102	0.0563146	0.0163406	0.857318	0.070027	0.16759	0.0846645	0.656887
105	30016.1	0	2.18007	2.17999	-27291	2724.99	Standard of care	0.0149042	0.439027	30016.1	0.43827	63.7101	0.0465479	0.0302683	0.120936	0.848796	0.21833	0.0277007	0.753969	0.0190513	0.0127754	0.968173	0.0286005	0.079306	0.892093	0.301377	0.618808	0.134007	0.501682	0.0326092	0.0326274	0.438371	0.439464	0.872791	0.0519939	0.102358	0.790762	0.10688	0.244523	0.158418	0.496051	0.101008	0.0689711	3.1575e-05	0.900156	0.0308412	0.149047	0.0976592	0.700223
106	32341.8	0	1.41893	1.42233	-30568.1	1777.91	Standard of care	0.0150335	0.423966	32341.8	0.448579	56.0328	0.0325279	0.0517747	0.144532	0.803693	0.333983	0.0447526	0.621264	0.0462374	0.0159482	0.937814	0.0165236	0.0743747	0.909102	0.408081	0.574094	0.127353	0.47699	0.0211804	0.0212489	0.448734	0.424538	0.768618	0.123821	0.0746832	0.819164	0.106153	0.203414	0.129886	0.514874	0.151827	0.0488536	0.000113862	0.885174	0.0658582	0.171609	0.0846296	0.67341
107	28372.7	0	1.6685	1.66626	-26287.1	2082.82	Standard of care	0.00784239	0.487995	28372.7	0.455646	58.1504	0.0271794	0.0394018	0.171531	0.789068	0.260335	0.0774112	0.662254	0.0122006	0.00363107	0.984168	0.0215463	0.0693809	0.909073	0.338482	0.565501	0.131002	0.527117	0.0249677	0.0249437	0.455798	0.488278	0.871827	0.102321	0.106073	0.784001	0.109926	0.246071	0.163751	0.509087	0.0810907	0.019839	0.00718551	0.947404	0.0255712	0.126484	0.0723766	0.686019
108	32118.3	0	4.35626	4.35651	-26673	5445.64	Standard of care	0.0118691	0.416716	32118.3	0.419794	60.2708	0.0531857	0.0722836	0.179903	0.747814	0.240332	0.0362243	0.723444	0.0312395	0.0255341	0.943226	0.0624089	0.0554102	0.882181	0.31061	0.871906	0.140174	0.494603	0.065261	0.0652744	0.4199	0.417257	0.799535	0.143371	0.0972311	0.73989	0.162879	0.220189	0.162094	0.42847	0.189247	0.0538357	0.00211033	0.92454	0.0195135	0.154678	0.0843004	0.651986
109	29486.2	0	1.82694	1.82957	-27202.5	2286.96	Standard of care	0.0184694	0.449013	29486.2	0.474478	59.8752	0.0484539	0.029126	0.140655	0.830219	0.215102	0.0503926	0.734505	0.0228886	0.0317847	0.945327	0.0233724	0.0743776	0.90225	0.332207	0.680152	0.126983	0.433743	0.0272638	0.0273264	0.474663	0.449721	0.814048	0.12904	0.10544	0.780792	0.113768	0.285016	0.139239	0.441233	0.134512	0.0505906	0.00089617	0.915303	0.0332101	0.145875	0.082676	0.691032
110	30643.7	0	2.01347	2.01141	-28126.8	2514.27	Standard of care	0.00996618	0.450937	30643.7	0.426126	60.5307	0.0146426	0.0933296	0.181702	0.724968	0.275062	0.0553668	0.669572	0.0163408	0.0161509	0.967508	0.0251762	0.0961295	0.878694	0.397302	0.567487	0.129263	0.480914	0.0301218	0.0301052	0.426259	0.451386	0.868138	0.0875935	0.0571647	0.800012	0.142823	0.250772	0.0883284	0.516834	0.144065	0.0394208	2.78034e-08	0.911181	0.0493984	0.158443	0.0789111	0.686563
111	28785.1	0	1.45919	1.45676	-26961.1	1820.95	Standard of care	0.00545151	0.47959	28785.1	0.416173	55.5045	0.0196398	0.0480567	0.148612	0.803331	0.228496	0.0429338	0.72857	0.0170723	0.0119774	0.97095	0.0184993	0.0719153	0.909585	0.364087	0.665888	0.128423	0.495616	0.0218524	0.0218222	0.416232	0.479776	0.845279	0.0931443	0.0955379	0.730555	0.173907	0.182813	0.213649	0.445699	0.157838	0.0527186	2.60705e-06	0.882931	0.0643478	0.21765	0.0677236	0.639082
112	29823.4	0	1.11663	1.11591	-28427.6	1394.89	Standard of care	0.0121039	0.423724	29823.4	0.416255	59.0933	0.0279741	0.0858587	0.188961	0.725181	0.2999	0.0299394	0.670161	0.0497443	0.0231787	0.927077	0.0115962	0.086138	0.902266	0.311232	0.751479	0.138884	0.479694	0.0166473	0.0166511	0.416343	0.424315	0.837307	0.103992	0.0722077	0.659513	0.268279	0.281265	0.100524	0.42521	0.193001	0.0637204	0.00075563	0.911134	0.0243897	0.203002	0.0824992	0.638921
113	29920.2	0	2.90145	2.89924	-26293.3	3624.05	Standard of care	0.0134301	0.462635	29920.2	0.442762	57.5938	0.0133068	0.0247035	0.156946	0.818351	0.313785	0.00912892	0.677086	0.0079095	0.0152482	0.976842	0.03937	0.0837664	0.876864	0.373059	0.521813	0.131005	0.408925	0.0434318	0.0434165	0.442786	0.463217	0.773131	0.117161	0.0943352	0.711105	0.194559	0.208008	0.127253	0.474711	0.190028	0.0322581	0.00254905	0.882099	0.0830933	0.0916455	0.0890328	0.731792
114	28092.3	0	2.09754	2.10214	-25470.4	2627.68	Standard of care	0.00830065	0.425427	28092.3	0.487757	60.5478	0.0194795	0.0554625	0.20403	0.740507	0.306182	0.0313513	0.662467	0.022134	0.0311047	0.946761	0.0266556	0.0992646	0.87408	0.399075	0.730731	0.130857	0.471568	0.0313875	0.0314703	0.487811	0.425874	0.78916	0.0997484	0.104415	0.707263	0.188322	0.291794	0.1457	0.473711	0.0887953	0.0740954	0.0118825	0.881021	0.0330014	0.154326	0.0579794	0.709406
115	28964.5	0	1.92997	1.93131	-26552.1	2414.14	Standard of care	0.0084982	0.451301	28964.5	0.475867	62.494	0.032771	0.0376819	0.133752	0.828566	0.23346	0.0447609	0.721779	0.0273004	0.0190659	0.953634	0.0255159	0.0706359	0.903848	0.298405	0.631733	0.126366	0.466553	0.0288918	0.0289222	0.475948	0.451592	0.864171	0.0933716	0.0440063	0.763223	0.19277	0.249017	0.143871	0.521552	0.0855597	0.0799977	2.58549e-05	0.861665	0.0583113	0.142117	0.0722379	0.708693
116	30759	0	2.87832	2.88234	-27161.1	3602.92	Standard of care	0.0128634	0.429753	30759	0.468945	54.0418	0.034032	0.0425758	0.200791	0.756633	0.288812	0.0346627	0.676525	0.0131112	0.023675	0.963214	0.0403711	0.049454	0.910175	0.39436	0.803771	0.13081	0.433816	0.0430723	0.0431428	0.469034	0.430478	0.812266	0.114623	0.0535503	0.811405	0.135045	0.261186	0.162205	0.484843	0.0917662	0.0468036	0.00562693	0.907707	0.0398627	0.151493	0.0751993	0.667228
117	29834	0	2.46207	2.46386	-26756.4	3079.82	Standard of care	0.0116751	0.41171	29834	0.442754	56.5268	0.0259425	0.0225293	0.178826	0.798645	0.200828	0.0460165	0.753156	0.0648409	0.00702795	0.928131	0.0333336	0.0711769	0.89549	0.347604	0.709046	0.11644	0.536766	0.0368519	0.0368914	0.442896	0.412212	0.87076	0.08043	0.0973351	0.761592	0.141073	0.193857	0.207132	0.493395	0.105617	0.0384992	2.78588e-05	0.93442	0.0270528	0.0829343	0.122549	0.709701
118	30764.1	0	0.88724	0.900847	-29655.1	1126.06	Standard of care	0.0148288	0.432627	30764.1	0.528791	56.1693	0.04567	0.0390016	0.119387	0.841611	0.330209	0.030512	0.639279	0.0403503	0.00399664	0.955653	0.00855377	0.0786774	0.912769	0.372021	0.514924	0.130304	0.492766	0.0132133	0.013439	0.528883	0.43307	0.810546	0.133454	0.136999	0.743797	0.119204	0.313179	0.138055	0.454082	0.0946832	0.0504771	0.000167554	0.915263	0.0340922	0.11765	0.10414	0.706934
119	30579.7	0	2.34501	2.34585	-27648.4	2932.31	Standard of care	0.0121636	0.445995	30579.7	0.455299	61.0597	0.0328631	0.0439108	0.157768	0.798321	0.285501	0.0593941	0.655105	0.056714	0.0213382	0.921948	0.0308617	0.0799479	0.88919	0.366853	0.687678	0.129826	0.479248	0.035082	0.0351099	0.455463	0.446477	0.81693	0.10882	0.09314	0.801913	0.104947	0.268861	0.158515	0.459592	0.113032	0.0162923	0.00423418	0.918731	0.0607422	0.136847	0.0495135	0.664558
120	28428.9	0	1.41281	1.41574	-26662.9	1769.67	Standard of care	0.0215274	0.463794	28428.9	0.479518	58.5981	0.0500427	0.0550803	0.121536	0.823384	0.313275	0.024106	0.662619	0.0422108	0.0114393	0.94635	0.016505	0.0593983	0.924097	0.303204	0.670412	0.143101	0.478579	0.0210687	0.0211347	0.479628	0.464421	0.828589	0.0998731	0.0520177	0.821776	0.126206	0.255927	0.149781	0.460553	0.133738	0.0267219	1.43086e-05	0.922119	0.0511451	0.152752	0.0938319	0.691806
121	30783.8	0	1.16227	1.16362	-29331	1454.53	Standard of care	0.0171173	0.435246	30783.8	0.445703	58.556	0.053648	0.0785553	0.185071	0.736374	0.260988	0.0174057	0.721606	0.0385569	0.0383122	0.923131	0.0127697	0.0655574	0.921673	0.305609	0.78066	0.134393	0.514653	0.0172997	0.0173372	0.445777	0.435997	0.897244	0.0524936	0.073368	0.743311	0.183321	0.29798	0.081192	0.514643	0.106186	0.0570498	8.73963e-06	0.910144	0.0327972	0.141923	0.0688143	0.71898
122	30624.8	0	2.17844	2.18048	-27901.8	2725.6	Standard of care	0.00749017	0.425837	30624.8	0.455481	58.6755	0.0433501	0.0315288	0.133831	0.834641	0.306098	0.0491333	0.644769	0.0169981	0.0251773	0.957825	0.0286619	0.0838215	0.887517	0.3161	0.550422	0.141867	0.476474	0.0326185	0.0326595	0.455563	0.426096	0.785241	0.160105	0.0742372	0.748898	0.176865	0.31325	0.122801	0.427914	0.136035	0.0484898	0.00865143	0.927758	0.0151004	0.141807	0.0756252	0.709642
123	30217.7	0	2.29153	2.2934	-27353.3	2866.75	Standard of care	0.0119132	0.437888	30217.7	0.458477	59.8435	0.0408063	0.0559135	0.184617	0.75947	0.28178	0.0155181	0.702702	0.0596126	0.0121314	0.928256	0.0281696	0.122816	0.849014	0.355343	0.683443	0.122964	0.516315	0.0342679	0.0343192	0.458522	0.438413	0.786684	0.138079	0.0838522	0.79692	0.119228	0.202843	0.182098	0.488087	0.126973	0.0503928	0.00023221	0.936105	0.0132701	0.137729	0.084899	0.60998
124	28489.9	0	1.12885	1.1332	-27078.9	1416.5	Standard of care	0.0107736	0.455281	28489.9	0.524618	58.8915	0.0155027	0.0445735	0.122268	0.833159	0.203785	0.0766684	0.719546	0.0337857	0.0395955	0.926619	0.0118751	0.103996	0.884128	0.385492	0.671154	0.122764	0.509697	0.0168516	0.0169373	0.524793	0.45559	0.798171	0.120753	0.0685195	0.836648	0.094833	0.177922	0.220584	0.472834	0.12866	0.0466452	0.000689719	0.911313	0.0413523	0.240135	0.0519763	0.635262
125	30317.7	0	2.64506	2.64007	-27011.4	3300.09	Standard of care	0.0190545	0.463601	30317.7	0.426274	55.3497	0.0514233	0.0223291	0.140727	0.836944	0.255721	0.0296626	0.714617	0.0199989	0.0527087	0.927292	0.0347296	0.095763	0.869507	0.30792	0.475477	0.132182	0.450573	0.0395293	0.039482	0.426401	0.464287	0.842957	0.0905382	0.0567575	0.803848	0.139395	0.232207	0.194736	0.46029	0.112768	0.0484236	0.00027151	0.858649	0.092656	0.237922	0.0537889	0.649658
126	31996.8	0	4.29124	4.29385	-26632.8	5367.32	Standard of care	0.00871527	0.437463	31996.8	0.466014	56.9345	0.0340177	0.0686225	0.14651	0.784868	0.32822	0.056258	0.615522	0.0218279	0.011808	0.966364	0.0607344	0.0732894	0.865976	0.412112	0.523533	0.130479	0.511644	0.0643166	0.0643663	0.46613	0.437768	0.818822	0.102002	0.132325	0.761727	0.105947	0.231076	0.194255	0.436635	0.138035	0.0419026	0.000155774	0.935211	0.0227307	0.108156	0.105319	0.702372
127	30010.5	0	4.24078	4.24383	-24709.5	5304.79	Standard of care	0.0101621	0.421373	30010.5	0.453053	58.9652	0.055209	0.0291884	0.179575	0.791236	0.3134	0.0310236	0.655577	0.0140862	0.0755312	0.910383	0.0609418	0.0536159	0.885442	0.376343	0.54971	0.122048	0.480117	0.0635349	0.0635896	0.453126	0.421855	0.843782	0.0801336	0.0876265	0.79245	0.119923	0.167141	0.148151	0.559353	0.125356	0.0634038	5.86989e-05	0.918052	0.0184857	0.150846	0.117661	0.691998
128	29616.3	0	1.32459	1.32953	-27960.6	1661.92	Standard of care	0.0192268	0.42941	29616.3	0.464016	60.241	0.0203754	0.0932842	0.117476	0.78924	0.274539	0.0355	0.689961	0.0340806	0.0336964	0.932223	0.0139891	0.0888544	0.897156	0.323477	0.749721	0.143951	0.464462	0.0197458	0.0198476	0.464161	0.430001	0.863469	0.0973909	0.0579961	0.788008	0.153996	0.186191	0.147491	0.496535	0.169782	0.0244306	0.00113794	0.895381	0.0790508	0.123665	0.0487167	0.745654
129	29996.7	0	2.36952	2.36811	-27034.8	2960.13	Standard of care	0.0117637	0.482572	29996.7	0.462839	55.2552	0.0316907	0.0373218	0.148341	0.814337	0.238839	0.0265833	0.734578	0.0503503	0.0127211	0.936929	0.0303553	0.10706	0.862585	0.299847	0.59579	0.145804	0.485756	0.0354556	0.0354553	0.462909	0.482969	0.809069	0.119322	0.118952	0.81442	0.0666273	0.254922	0.20832	0.436316	0.100442	0.0322439	0.0139213	0.909211	0.0446243	0.132971	0.0443149	0.755722
130	31058.9	0	2.17043	2.176	-28345.9	2720	Standard of care	0.00789437	0.460706	31058.9	0.539673	61.3351	0.0574534	0.0655436	0.176834	0.757622	0.32032	0.00772818	0.671952	0.0395488	0.00957754	0.950874	0.0278596	0.0963067	0.875834	0.345534	0.627685	0.132738	0.480014	0.0324802	0.0325782	0.539685	0.461045	0.806634	0.128971	0.0570081	0.803106	0.139886	0.201548	0.178713	0.494682	0.125056	0.0430147	1.86627e-05	0.906693	0.0502738	0.194787	0.0774991	0.62176
131	30316.3	0	1.63792	1.64096	-28268.9	2051.2	Standard of care	0.011813	0.416094	30316.3	0.45705	57.4622	0.0272201	0.044904	0.1155	0.839596	0.239868	0.0184364	0.741696	0.0369829	0.0291381	0.933879	0.0201962	0.0844302	0.895374	0.326668	0.510005	0.134558	0.468816	0.0244974	0.0245598	0.457098	0.41646	0.793884	0.169936	0.0881048	0.799698	0.112197	0.289193	0.143135	0.470657	0.0970149	0.10875	0.00132002	0.849472	0.0404571	0.144368	0.122873	0.651658
132	30675.3	0	1.71178	1.70724	-28535.5	2134.05	Standard of care	0.0138545	0.444223	30675.3	0.395382	60.9366	0.0118389	0.117438	0.174896	0.707666	0.234083	0.077939	0.687978	0.0190981	0.0483076	0.932594	0.0187535	0.128211	0.853035	0.301255	0.666581	0.132623	0.466376	0.0255491	0.025505	0.395646	0.444846	0.777824	0.16738	0.0631065	0.826979	0.109915	0.237448	0.140086	0.485577	0.136889	0.0450686	0.00166598	0.915071	0.0381945	0.225212	0.0622028	0.688821
133	29019.8	0	2.2613	2.2667	-26193.2	2833.37	Standard of care	0.0186966	0.432769	29019.8	0.499613	58.3533	0.0512334	0.0563056	0.13743	0.806265	0.186058	0.0485577	0.765385	0.0529148	0.0298112	0.917274	0.0281267	0.11171	0.860163	0.410184	0.665261	0.142492	0.485036	0.033765	0.0338821	0.499802	0.433412	0.813815	0.105552	0.0480856	0.814511	0.137403	0.262149	0.264109	0.375238	0.0985044	0.058656	0.0209605	0.864907	0.055477	0.110887	0.077272	0.713578
134	29026.9	0	1.49958	1.49884	-27152.4	1873.55	Standard of care	0.0197421	0.422897	29026.9	0.415855	55.2709	0.0290971	0.0377837	0.171025	0.791192	0.192585	0.0401605	0.767254	0.0330074	0.00913703	0.957856	0.0187449	0.058077	0.923178	0.38911	0.68928	0.145477	0.498207	0.0223578	0.0223639	0.416052	0.423732	0.83573	0.080032	0.0674375	0.840945	0.0916177	0.256293	0.137296	0.453636	0.152775	0.0125159	0.000132009	0.94553	0.0418224	0.284831	0.0700358	0.566746
135	32327.1	0	2.45565	2.46173	-29257.6	3077.16	Standard of care	0.0139726	0.406607	32327.1	0.47645	59.1311	0.0378201	0.056512	0.136784	0.806705	0.206611	0.0303619	0.763027	0.0108941	0.0181796	0.970926	0.0336536	0.0588153	0.907531	0.335821	0.522856	0.142067	0.476316	0.0367497	0.0368547	0.476541	0.407116	0.822556	0.140112	0.234436	0.618343	0.147221	0.269584	0.14284	0.481399	0.106176	0.0475166	4.14002e-05	0.908668	0.0437744	0.129676	0.0761501	0.724941
136	29518.9	0	1.07609	1.07894	-28173.8	1348.68	Standard of care	0.0119248	0.437232	29518.9	0.467037	57.4519	0.0523802	0.04959	0.135425	0.814985	0.236551	0.0374142	0.726035	0.0105492	0.0112308	0.97822	0.0112353	0.0942143	0.89455	0.318536	0.65613	0.135551	0.531876	0.0160497	0.0161117	0.467146	0.4376	0.902023	0.0663376	0.0428961	0.801258	0.155846	0.319048	0.118552	0.460474	0.101925	0.0259889	2.04785e-05	0.900438	0.0735523	0.128197	0.0817893	0.704188
137	29683.3	0	3.95728	3.95678	-24736.7	4945.97	Standard of care	0.0140472	0.415361	29683.3	0.409937	62.0796	0.0206803	0.0369306	0.227151	0.735919	0.247145	0.0203991	0.732456	0.0350386	0.0451032	0.919858	0.0558012	0.0708737	0.873325	0.310435	0.632708	0.127607	0.468066	0.0592392	0.0592454	0.410007	0.416226	0.855151	0.121017	0.0516812	0.832722	0.115596	0.26267	0.127016	0.480674	0.12964	0.0114157	0.0205299	0.884917	0.0831372	0.102366	0.0809987	0.690145
138	30238.2	0	2.86759	2.86668	-26653.7	3583.36	Standard of care	0.0101141	0.45814	30238.2	0.438769	57.6026	0.0520063	0.0863922	0.125774	0.787834	0.234116	0.0294332	0.736451	0.0774584	0.0437443	0.878797	0.0404501	0.041309	0.918241	0.296841	0.671416	0.121935	0.443956	0.0429577	0.0429503	0.438834	0.458476	0.745117	0.131879	0.0836786	0.81993	0.0963914	0.274468	0.169264	0.447323	0.108944	0.029179	7.3714e-05	0.937428	0.0333188	0.142381	0.0957809	0.667673
139	28442.8	0	3.19025	3.19884	-24455	3998.55	Standard of care	0.0131299	0.423353	28442.8	0.508566	61.1129	0.0136242	0.0590975	0.161556	0.779346	0.28994	0.0189748	0.691086	0.0469986	0.0362266	0.916775	0.0444688	0.0597364	0.895795	0.35233	0.818757	0.144342	0.477619	0.04777	0.0479133	0.508616	0.4239	0.796759	0.0831352	0.141233	0.762836	0.0959313	0.344102	0.11726	0.469064	0.0695735	0.0596841	0.00470646	0.906837	0.0287729	0.119333	0.119877	0.6797
140	28841.9	0	3.58329	3.58349	-24362.8	4479.36	Standard of care	0.00668294	0.424532	28841.9	0.429884	58.9494	0.0493073	0.032641	0.258115	0.709244	0.216098	0.00914092	0.774761	0.028163	0.00394564	0.967891	0.0505116	0.0728487	0.87664	0.298329	0.718284	0.134509	0.450522	0.0536818	0.0536919	0.429898	0.425004	0.763491	0.139469	0.0806863	0.794798	0.124515	0.289723	0.177609	0.420765	0.111903	0.047092	0.000484102	0.927044	0.0253795	0.146351	0.105536	0.659623
141	30037.9	0	2.32406	2.32393	-27132.9	2904.91	Standard of care	0.0233871	0.454855	30037.9	0.454214	57.2976	0.0218314	0.0929781	0.128975	0.778047	0.289116	0.0255893	0.685295	0.0275439	0.0725991	0.899857	0.0295806	0.0682497	0.90217	0.30616	0.700235	0.145602	0.485504	0.0347127	0.0347357	0.454349	0.455578	0.866393	0.087542	0.112014	0.764795	0.123191	0.317371	0.171872	0.372873	0.137884	0.0799085	0.000357325	0.902222	0.0175125	0.151807	0.0999587	0.707094
142	29783.5	0	2.21555	2.21493	-27014.1	2768.66	Standard of care	0.00511794	0.420791	29783.5	0.396452	59.9964	0.0357927	0.0300709	0.162706	0.807224	0.221553	0.0423563	0.73609	0.0686522	0.0164984	0.914849	0.0295115	0.0818906	0.888598	0.366876	0.744146	0.137019	0.487915	0.0331923	0.0331889	0.396507	0.421004	0.770384	0.131456	0.0449385	0.875971	0.0790901	0.26663	0.183445	0.394182	0.155742	0.0825427	0.00120823	0.856006	0.0602427	0.225906	0.0401019	0.631097
143	31145.7	0	3.71536	3.71492	-26501.5	4643.66	Standard of care	0.00877203	0.474283	31145.7	0.467939	63.1676	0.0375231	0.0492925	0.214674	0.736034	0.248117	0.0489686	0.702914	0.013863	0.0254104	0.960727	0.0527581	0.0620358	0.885206	0.326724	0.86074	0.147636	0.502135	0.0556571	0.0556594	0.468037	0.474703	0.832818	0.094483	0.077518	0.741964	0.180518	0.214795	0.103286	0.490737	0.191182	0.0402475	0.00404835	0.927328	0.0283765	0.111388	0.084297	0.706347
144	30932.2	0	1.64708	1.64547	-28873.3	2056.84	Standard of care	0.0137441	0.444775	30932.2	0.430799	60.2051	0.0477771	0.029349	0.143542	0.827109	0.264763	0.0173734	0.717863	0.0232857	0.0305303	0.946184	0.0207233	0.069442	0.909835	0.367258	0.514394	0.136578	0.522007	0.0246159	0.0246067	0.430861	0.445227	0.810597	0.0959952	0.0701004	0.850614	0.0792859	0.307569	0.114354	0.451463	0.126615	0.0279707	0.00834282	0.934296	0.0293908	0.163611	0.0438091	0.657654
145	29321.1	0	1.39409	1.39253	-27578.5	1740.66	Standard of care	0.0149587	0.476404	29321.1	0.462666	60.4961	0.0225431	0.058156	0.123077	0.818767	0.25064	0.0255658	0.723795	0.0108165	0.00845467	0.980729	0.0152761	0.106088	0.878636	0.345486	0.810444	0.117883	0.475391	0.0208142	0.0208178	0.462752	0.47685	0.812775	0.111108	0.0334604	0.737974	0.228565	0.308506	0.141514	0.38972	0.16026	0.0170915	0.00263145	0.975897	0.00438045	0.110266	0.0874708	0.663003
146	31159.6	0	1.35932	1.35635	-29460.5	1695.43	Standard of care	0.0114458	0.46506	31159.6	0.426572	55.1726	0.0447615	0.0399725	0.228566	0.731461	0.260476	0.025143	0.714381	0.0155802	0.0126294	0.97179	0.0146972	0.115692	0.869611	0.381582	0.816407	0.132548	0.414107	0.020257	0.0202318	0.426631	0.465772	0.801007	0.0855901	0.0512342	0.784752	0.164014	0.250071	0.119729	0.46882	0.16138	0.0316865	0.00139203	0.922836	0.0440854	0.0994925	0.0597273	0.768693
147	28261.5	0	1.19625	1.19822	-26766.2	1497.77	Standard of care	0.0116551	0.493095	28261.5	0.526441	60.14	0.0429607	0.0436847	0.147296	0.809019	0.201674	0.0565438	0.741782	0.0445809	0.0224351	0.932984	0.0136372	0.0843325	0.90203	0.318166	0.625261	0.139513	0.479622	0.0178468	0.0178944	0.52657	0.493484	0.792943	0.101897	0.048693	0.843033	0.108274	0.286717	0.133356	0.449165	0.130762	0.0360665	8.33732e-05	0.899755	0.064095	0.165642	0.0950883	0.716837
148	29724.5	0	4.20283	4.21356	-24471	5266.95	Standard of care	0.0240531	0.459843	29724.5	0.547793	56.2828	0.00841246	0.119793	0.136557	0.74365	0.247323	0.0533414	0.699336	0.0937902	0.0107494	0.89546	0.0589062	0.0501243	0.890969	0.392617	0.849121	0.131814	0.488373	0.0629137	0.0630943	0.548039	0.460631	0.877265	0.102347	0.104925	0.790711	0.104364	0.243369	0.21209	0.471285	0.0732569	0.0441274	0.000650244	0.839693	0.11553	0.130136	0.0603211	0.759898
149	30596.5	0	1.84149	1.84222	-28294.7	2302.77	Standard of care	0.0187615	0.474729	30596.5	0.479192	56.0468	0.0258467	0.0251152	0.155709	0.819176	0.274655	0.0511887	0.674156	0.0339083	0.0136068	0.952485	0.0247655	0.0341957	0.941039	0.383547	0.822537	0.13431	0.534931	0.0275139	0.0275359	0.479423	0.475347	0.848497	0.108153	0.0978729	0.758658	0.143469	0.196639	0.172298	0.52236	0.108703	0.102115	0.00746425	0.876153	0.0142678	0.165263	0.0572704	0.71698
150	28328.8	0	0.860066	0.866262	-27253.7	1082.83	Standard of care	0.00919999	0.394751	28328.8	0.476962	54.7252	0.0270768	0.0168438	0.13717	0.845986	0.272851	0.0562484	0.6709	0.0200861	0.00816139	0.971752	0.00800987	0.101331	0.890659	0.405815	0.7802	0.130079	0.482782	0.0128286	0.0129371	0.477076	0.395095	0.808194	0.121006	0.0601682	0.772733	0.167099	0.317535	0.147506	0.46015	0.074808	0.0459909	0.0024549	0.918879	0.0326752	0.215243	0.0495802	0.664327
151	30697.1	0	2.38465	2.38426	-27716.3	2980.32	Standard of care	0.0191914	0.438565	30697.1	0.435782	57.234	0.0364973	0.0523485	0.146228	0.801423	0.233857	0.0420586	0.724085	0.00340095	0.0404171	0.956182	0.031848	0.0649467	0.903205	0.294884	0.652272	0.130644	0.485304	0.0356402	0.0356537	0.435975	0.43927	0.821008	0.102582	0.0890578	0.736344	0.174599	0.198683	0.173028	0.501204	0.127085	0.0383601	0.0113246	0.847864	0.102451	0.115578	0.0905395	0.721066
152	28948.2	0	1.91869	1.91072	-26549.9	2388.4	Standard of care	0.0209397	0.445256	28948.2	0.373338	55.8786	0.0459063	0.0711624	0.191843	0.736995	0.187745	0.134622	0.677633	0.015369	0.0090358	0.975595	0.0219432	0.125152	0.852904	0.359118	0.840918	0.137056	0.443165	0.0285473	0.0284667	0.374013	0.446327	0.722209	0.180015	0.103615	0.804481	0.0919037	0.281051	0.161531	0.455966	0.101451	0.0492019	0.00404365	0.901846	0.0449081	0.0890501	0.157189	0.715476
153	31115.1	0	2.61075	2.61693	-27851.6	3271.16	Standard of care	0.00825282	0.41391	31115.1	0.537629	61.2681	0.0269393	0.0334197	0.130913	0.835667	0.249065	0.0150102	0.735925	0.0511262	0.00299345	0.94588	0.0350553	0.0895021	0.875443	0.404822	0.478025	0.127735	0.458726	0.0391089	0.0392157	0.537652	0.414209	0.826329	0.134737	0.107048	0.7806	0.112352	0.272409	0.129901	0.461842	0.135848	0.022031	0.00765602	0.905439	0.0648743	0.13657	0.090593	0.673852
154	32726.8	0	4.47834	4.47763	-27128.9	5597.03	Standard of care	0.0082577	0.467143	32726.8	0.456283	58.2513	0.0414253	0.0820501	0.111697	0.806253	0.258639	0.0442004	0.69716	0.0157041	0.00320602	0.98109	0.0618555	0.118338	0.819807	0.334458	0.641611	0.11772	0.492375	0.0671205	0.0671262	0.456369	0.467363	0.86971	0.0681508	0.118337	0.797349	0.0843141	0.194557	0.212413	0.509239	0.0837905	0.043991	0.000943326	0.905094	0.0499715	0.20966	0.0418201	0.646816
155	32422.9	0	2.60827	2.6093	-29162.5	3261.62	Standard of care	0.0106543	0.437853	32422.9	0.450739	60.7933	0.0264061	0.0265476	0.0578825	0.91557	0.255118	0.0815088	0.663373	0.0127702	0.0243683	0.962861	0.0332242	0.130424	0.836352	0.353362	0.894472	0.133715	0.461091	0.039058	0.0390974	0.450929	0.438015	0.787501	0.0750843	0.0706863	0.825244	0.104069	0.26574	0.181495	0.482017	0.0707476	0.0408164	0.0165801	0.893367	0.0492369	0.130642	0.0779705	0.719816
156	30240.6	0	2.7675	2.76816	-26781.3	3460.21	Standard of care	0.00411086	0.420522	30240.6	0.444164	57.7188	0.0088901	0.0307607	0.156707	0.812533	0.21037	0.0848857	0.704744	0.00878668	0.0055547	0.985659	0.0391949	0.0524713	0.908334	0.369967	0.761383	0.12978	0.495061	0.041492	0.0415052	0.444247	0.420686	0.877334	0.0727626	0.0583064	0.787153	0.154541	0.223889	0.188715	0.479366	0.10803	0.0328785	0.00486137	0.938997	0.0232632	0.171809	0.049173	0.713804
157	29784	0	3.10316	3.10473	-25905.1	3880.91	Standard of care	0.0133533	0.434483	29784	0.448027	63.1631	0.0542832	0.0643129	0.194958	0.740729	0.293868	0.0384438	0.667688	0.0209457	0.0304013	0.948653	0.0435266	0.0478004	0.908673	0.314312	0.698825	0.143217	0.476812	0.0464403	0.0464736	0.448143	0.435143	0.878261	0.081428	0.0615977	0.801044	0.137358	0.255044	0.10941	0.470131	0.165416	0.0298999	0.0106094	0.936407	0.0230832	0.142261	0.0640924	0.69711
158	29706.4	0	2.64855	2.65149	-26395.7	3314.36	Standard of care	0.0117742	0.428162	29706.4	0.459183	56.1387	0.02008	0.0762073	0.129935	0.793858	0.255164	0.0190837	0.725752	0.0175227	0.00733221	0.975145	0.035447	0.0814425	0.883111	0.403538	0.457458	0.125589	0.50926	0.0396659	0.0397259	0.459237	0.428537	0.82837	0.0905284	0.0780288	0.817678	0.104293	0.223677	0.177592	0.407685	0.191047	0.0457156	0.00553324	0.900198	0.0485536	0.173442	0.123812	0.67347
159	29498	0	1.68337	1.68681	-27393.7	2108.51	Standard of care	0.00732556	0.43903	29498	0.485947	63.2851	0.050844	0.0360148	0.147522	0.816463	0.320168	0.00731889	0.672513	0.0141626	0.0116226	0.974215	0.021219	0.0826408	0.89614	0.377205	0.633237	0.145833	0.491721	0.0251918	0.0252541	0.485958	0.439293	0.746212	0.215095	0.0757433	0.789458	0.134799	0.277159	0.0842273	0.523929	0.114685	0.071482	0.0150001	0.861816	0.051702	0.171527	0.081981	0.682665
160	32436.6	0	3.17693	3.17432	-28465.4	3967.9	Standard of care	0.0136483	0.45247	32436.6	0.425869	55.5019	0.0120542	0.057576	0.197375	0.745049	0.224888	0.031239	0.743873	0.0184977	0.0169411	0.964561	0.0447363	0.0511682	0.904096	0.312276	0.569489	0.12344	0.522366	0.0475667	0.0475381	0.425981	0.453087	0.777395	0.170122	0.0483972	0.787964	0.163639	0.267809	0.188944	0.440018	0.103229	0.0299859	0.00158571	0.925925	0.0425036	0.169476	0.097834	0.704346
161	29350.8	0	1.82165	1.82532	-27073.7	2281.65	Standard of care	0.0134664	0.452141	29350.8	0.509327	62.5193	0.056522	0.063547	0.21173	0.724723	0.188698	0.093243	0.718059	0.0208633	0.0155314	0.963605	0.0234743	0.0721029	0.904423	0.342759	0.639481	0.135892	0.414918	0.0271771	0.0272473	0.509548	0.45293	0.798281	0.106423	0.0677121	0.837406	0.0948814	0.242243	0.159584	0.481368	0.116805	0.0394201	0.0167426	0.923993	0.0198444	0.148451	0.0527223	0.706574
162	29005.3	0	2.88556	2.87733	-25398.4	3596.66	Standard of care	0.0124561	0.427212	29005.3	0.348899	62.5732	0.0492121	0.0379	0.160305	0.801795	0.285257	0.0413872	0.673356	0.0255528	0.00309777	0.971349	0.0399664	0.0566761	0.903358	0.294258	0.747139	0.123294	0.484251	0.0432009	0.0430874	0.349042	0.427729	0.716028	0.202511	0.116247	0.769501	0.114252	0.318343	0.163538	0.436355	0.0817645	0.0395147	0.0216162	0.908968	0.0299012	0.182142	0.0973383	0.669058
163	29670.9	0	1.83273	1.83707	-27379.9	2296.34	Standard of care	0.00910451	0.456506	29670.9	0.513999	61.1048	0.0172639	0.0210631	0.180224	0.798713	0.311482	0.0204887	0.66803	0.0439622	0.0109701	0.945068	0.0224146	0.106916	0.870669	0.391018	0.752071	0.131847	0.466682	0.0274151	0.027498	0.514036	0.456919	0.794664	0.0862929	0.0743085	0.793926	0.131765	0.320486	0.108486	0.436021	0.135007	0.0613428	0.00846143	0.879084	0.0511118	0.108521	0.103297	0.719837
164	28997.1	0	1.99611	1.99055	-26501.9	2488.19	Standard of care	0.0179126	0.457506	28997.1	0.413984	63.376	0.0105255	0.0293698	0.1602	0.81043	0.221365	0.0456403	0.732995	0.0218609	0.00893812	0.969201	0.0259442	0.0682753	0.905781	0.384417	0.811848	0.131119	0.531614	0.0298279	0.029764	0.414205	0.458139	0.791786	0.105374	0.118212	0.732247	0.149541	0.210877	0.13609	0.448154	0.204878	0.0538411	0.000485623	0.912525	0.0331487	0.103366	0.0781262	0.708685
165	30404.2	0	1.69252	1.68627	-28288.6	2107.84	Standard of care	0.0177878	0.48285	30404.2	0.428014	53.5749	0.0236957	0.0430954	0.207875	0.749029	0.224158	0.0429664	0.732875	0.0198859	0.0618518	0.918262	0.0209307	0.076363	0.902706	0.383388	0.619278	0.132281	0.474726	0.0252273	0.0251528	0.428194	0.483722	0.82989	0.103444	0.130907	0.781311	0.087782	0.305316	0.205996	0.417586	0.0711011	0.0810351	0.00198505	0.885082	0.0318983	0.202462	0.0369774	0.682697
166	29701.5	0	2.36608	2.3585	-26743.9	2948.13	Standard of care	0.00983742	0.474746	29701.5	0.362732	56.6833	0.0098625	0.0631237	0.142556	0.79432	0.285232	0.0563556	0.658413	0.0525009	0.0312437	0.916255	0.0298637	0.113414	0.856722	0.310375	0.874751	0.14219	0.44286	0.0354221	0.0353231	0.362866	0.475098	0.804149	0.077996	0.100225	0.734346	0.165429	0.239628	0.139467	0.531604	0.0893016	0.0227974	0.0182569	0.912055	0.046891	0.183122	0.0729822	0.663015
167	29382	0	4.37703	4.37803	-23910.8	5472.54	Standard of care	0.010451	0.426276	29382	0.440092	58.1241	0.0280463	0.0304872	0.178206	0.791307	0.247913	0.054338	0.697749	0.0299369	0.00377014	0.966293	0.0623149	0.0734551	0.86423	0.399422	0.746577	0.128676	0.473514	0.0655829	0.0656099	0.440223	0.426766	0.769688	0.0987712	0.0642134	0.782159	0.153627	0.244722	0.157097	0.514514	0.0836667	0.0541489	0.00113905	0.904422	0.0402897	0.206336	0.0690017	0.676502
168	29323.4	0	1.21889	1.20733	-27799.8	1509.16	Standard of care	0.0211404	0.479375	29323.4	0.41576	60.9126	0.0328385	0.0121627	0.0946741	0.893163	0.293006	0.0291597	0.677834	0.0194733	0.0129368	0.96759	0.013046	0.0855988	0.901355	0.312661	0.702854	0.135207	0.471384	0.0181695	0.0180253	0.415906	0.479851	0.800666	0.180121	0.0533106	0.811121	0.135569	0.198341	0.132211	0.557256	0.112191	0.0533311	0.000697492	0.867109	0.0788626	0.135805	0.0413881	0.728644
169	28284	0	1.49204	1.49594	-26418.9	1869.93	Standard of care	0.0113338	0.447704	28284	0.485249	61.0594	0.0393104	0.0710526	0.157145	0.771802	0.28945	0.0377453	0.672804	0.0126175	0.0426718	0.944711	0.0179285	0.0804793	0.901592	0.351373	0.683655	0.134944	0.499693	0.022289	0.0223633	0.485344	0.44813	0.845393	0.0751243	0.0831679	0.708727	0.208105	0.266307	0.137884	0.489146	0.106663	0.0488233	0.0331692	0.892652	0.0253558	0.125172	0.129366	0.647674
170	32063.3	0	2.60274	2.60093	-28809.9	3251.16	Standard of care	0.00496097	0.48221	32063.3	0.439213	60.2383	0.0198595	0.0646833	0.145495	0.789821	0.283847	0.0219703	0.694183	0.0169366	0.0219649	0.961099	0.0338379	0.116674	0.849488	0.30482	0.74787	0.131135	0.480566	0.039006	0.0389879	0.439238	0.482379	0.778553	0.132909	0.0649729	0.792286	0.142741	0.219452	0.0866517	0.537511	0.156386	0.0630988	0.0103435	0.900458	0.0260998	0.194397	0.0519843	0.707276
171	30042.4	0	3.77626	3.77805	-25322.1	4722.56	Standard of care	0.00815575	0.435962	30042.4	0.458704	56.4161	0.0189822	0.0339108	0.101479	0.864611	0.333289	0.0239929	0.642718	0.0275729	0.0199081	0.952519	0.0531962	0.0724076	0.874396	0.298378	0.779355	0.14646	0.47326	0.0566108	0.0566476	0.458747	0.436172	0.788149	0.102919	0.0529864	0.779973	0.167041	0.29558	0.147894	0.43508	0.121446	0.0521236	0.00305072	0.884186	0.0606393	0.160745	0.0646594	0.690496
172	30547.6	0	1.39904	1.40033	-28798.8	1750.42	Standard of care	0.0135906	0.424473	30547.6	0.437953	58.6346	0.0418098	0.0619603	0.172868	0.765171	0.250278	0.0379702	0.711752	0.0307645	0.0196122	0.949623	0.014693	0.120744	0.864563	0.375825	0.644681	0.130663	0.483025	0.0208593	0.0209038	0.438075	0.425081	0.848106	0.0976373	0.046993	0.791565	0.161442	0.326408	0.128862	0.422799	0.12193	0.00624433	0.0101924	0.942022	0.0415411	0.157629	0.0771664	0.668157
173	31578.5	0	1.39396	1.39557	-29836	1744.47	Standard of care	0.0112425	0.448339	31578.5	0.468824	55.2553	0.0525611	0.0319781	0.0932658	0.874756	0.268567	0.0625644	0.668869	0.0426139	0.00724837	0.950138	0.015617	0.10666	0.877723	0.343638	0.641924	0.139736	0.459399	0.0208243	0.0208691	0.468971	0.448608	0.868093	0.0652463	0.142373	0.736402	0.121225	0.312814	0.148513	0.442835	0.0958376	0.0426577	5.97816e-05	0.929091	0.0281914	0.170353	0.0731166	0.668956
174	30202.6	0	2.99876	2.99906	-26454.1	3748.83	Standard of care	0.0148985	0.474086	30202.6	0.478052	57.7681	0.0517854	0.0713706	0.157879	0.77075	0.210858	0.0306659	0.758476	0.05398	0.0122387	0.933781	0.0397497	0.102427	0.857823	0.400174	0.722066	0.120708	0.494177	0.0448642	0.0448943	0.478155	0.474636	0.828825	0.122593	0.0847879	0.785006	0.130207	0.269593	0.0958992	0.529973	0.104535	0.0254037	0.00050356	0.880237	0.0938562	0.128773	0.0567776	0.685844
175	29550.2	0	2.9601	2.96494	-25850.1	3706.17	Standard of care	0.0185984	0.397679	29550.2	0.4352	58.4308	0.040406	0.0482847	0.218853	0.732862	0.233286	0.0127467	0.753967	0.0247974	0.0150371	0.960166	0.0408605	0.0583797	0.90076	0.331764	0.777008	0.137134	0.500595	0.0442561	0.0443452	0.435258	0.398735	0.819912	0.0929422	0.0710496	0.782887	0.146063	0.249989	0.182213	0.487144	0.0806537	0.0497462	0.0177501	0.903708	0.028796	0.112149	0.0864263	0.721443
176	30618.5	0	4.00191	4.00344	-25616.1	5004.3	Standard of care	0.0140223	0.44977	30618.5	0.462402	58.7492	0.0308302	0.016494	0.114977	0.868529	0.29991	0.0428253	0.657265	0.0286924	0.0196497	0.951658	0.0551387	0.105277	0.839585	0.376297	0.803352	0.12896	0.477402	0.0599409	0.0599892	0.462536	0.450174	0.755518	0.153466	0.0590473	0.82158	0.119372	0.382895	0.0815042	0.460908	0.0746926	0.0510223	0.00668349	0.899403	0.0428911	0.111072	0.0568254	0.716596
177	32094.9	0	1.50375	1.50912	-30215.2	1886.4	Standard of care	0.013895	0.424949	32094.9	0.483931	54.5499	0.051191	0.0409617	0.144895	0.814143	0.235614	0.0461892	0.718197	0.0304339	0.0460597	0.923506	0.0186939	0.0689736	0.912333	0.386368	0.795169	0.121232	0.480495	0.0224509	0.0225479	0.48407	0.425477	0.810051	0.127752	0.0329486	0.874914	0.0921378	0.204465	0.181697	0.48599	0.127849	0.0591508	0.0109202	0.851573	0.0783557	0.0810101	0.0844967	0.709542
178	28925.9	0	2.54346	2.54679	-25746.5	3183.48	Standard of care	0.0170161	0.454368	28925.9	0.477	58.2199	0.0286664	0.036933	0.0929139	0.870153	0.300379	0.0282171	0.671403	0.0335747	0.0263471	0.940078	0.032288	0.112099	0.855613	0.335394	0.699608	0.141234	0.48711	0.0380513	0.0381349	0.477105	0.454747	0.818429	0.0787184	0.0709363	0.806422	0.122642	0.253678	0.199662	0.458311	0.0883482	0.0260025	0.00496378	0.902109	0.0669244	0.141387	0.112889	0.679398
179	31033.8	0	2.3628	2.35211	-28080.3	2940.14	Standard of care	0.0108777	0.489257	31033.8	0.37996	60.54	0.0202482	0.0367842	0.149242	0.813974	0.277004	0.0561681	0.666828	0.0247041	0.037043	0.938253	0.0327521	0.042656	0.924592	0.360109	0.619024	0.143822	0.532772	0.0353772	0.035224	0.380133	0.489589	0.818915	0.108512	0.0969843	0.7275	0.175516	0.324325	0.140168	0.480031	0.0554759	0.0441123	0.000140825	0.912268	0.043479	0.162524	0.0912779	0.660969
180	31175.8	0	0.818838	0.820091	-30152.2	1025.11	Standard of care	0.0096979	0.394582	31175.8	0.41282	57.3582	0.0302606	0.0363843	0.270228	0.693387	0.215738	0.0710796	0.713183	0.00870209	0.00708858	0.984209	0.00902892	0.0592442	0.931727	0.335099	0.81911	0.14645	0.505034	0.0121783	0.012205	0.412994	0.395253	0.822965	0.115976	0.0647327	0.765059	0.170208	0.140824	0.227223	0.512116	0.119837	0.0370135	0.000675473	0.932477	0.0298339	0.144577	0.0969971	0.691905
181	30339.2	0	3.22599	3.22489	-26306.7	4031.11	Standard of care	0.012052	0.433122	30339.2	0.42454	58.4964	0.0171455	0.0597384	0.219629	0.720632	0.355548	0.00971004	0.634742	0.0340017	0.058925	0.907073	0.0433604	0.0924317	0.864208	0.369871	0.55304	0.130835	0.500833	0.0482892	0.0482884	0.424569	0.433773	0.892501	0.0814949	0.0547925	0.796512	0.148696	0.261515	0.0916764	0.489459	0.15735	0.041341	0.00646962	0.881645	0.0705448	0.169262	0.0957207	0.652122
182	28582.6	0	1.12792	1.13412	-27172.7	1417.65	Standard of care	0.0106848	0.450258	28582.6	0.529494	58.5494	0.0429398	0.0419908	0.0947218	0.863287	0.277692	0.0277145	0.694593	0.0488331	0.0272439	0.923923	0.0141574	0.0446452	0.941197	0.294797	0.910017	0.130549	0.481459	0.0168656	0.0169679	0.529552	0.450509	0.890359	0.0658586	0.109707	0.736348	0.153946	0.232016	0.165978	0.441317	0.160689	0.0464837	0.00369221	0.924786	0.0250384	0.178214	0.0804526	0.656126
183	28567	0	2.25861	2.25178	-25743.7	2814.72	Standard of care	0.0143053	0.487212	28567	0.425149	55.5704	0.0527988	0.0648168	0.194961	0.740222	0.297325	0.0348117	0.667863	0.0492651	0.0156568	0.935078	0.0267889	0.13625	0.836961	0.40304	0.762623	0.144423	0.466047	0.0337286	0.0336548	0.425264	0.487865	0.892337	0.0549835	0.0842931	0.824902	0.0908048	0.231617	0.158641	0.505995	0.103747	0.0878286	2.62114e-06	0.85182	0.0603486	0.169413	0.106141	0.647469
184	29710.1	0	2.30028	2.29725	-26834.7	2871.56	Standard of care	0.0164192	0.444752	29710.1	0.411652	60.3836	0.0372208	0.0228685	0.134913	0.842218	0.22152	0.0967401	0.68174	0.0249408	0.0259863	0.949073	0.0282805	0.1315	0.840219	0.398538	0.658391	0.128157	0.418941	0.034354	0.0343418	0.411993	0.445376	0.766905	0.172722	0.0470095	0.828535	0.124455	0.281939	0.115142	0.518485	0.0844338	0.0523932	4.99781e-05	0.900803	0.046754	0.105353	0.0694388	0.656641
185	29269.4	0	2.20623	2.20471	-26511.6	2755.89	Standard of care	0.00781339	0.4463	29269.4	0.417838	59.6416	0.0144	0.0371268	0.124601	0.838272	0.265436	0.0318538	0.70271	0.0518192	0.0178732	0.930308	0.0272489	0.127167	0.845584	0.356917	0.581644	0.137718	0.479722	0.0330422	0.0330345	0.417897	0.446542	0.853281	0.0578648	0.0795811	0.797323	0.123096	0.25186	0.139245	0.442896	0.165999	0.0436852	0.00174376	0.922363	0.0322083	0.152438	0.0844695	0.720336
186	29608.4	0	1.80282	1.80642	-27354.8	2258.03	Standard of care	0.00720718	0.41931	29608.4	0.480848	58.7093	0.0429546	0.0228855	0.227841	0.749273	0.275345	0.0411213	0.683533	0.0336555	0.00918374	0.957161	0.0242401	0.0550848	0.920675	0.410152	0.767958	0.147382	0.501615	0.0269767	0.0270371	0.480914	0.419716	0.800423	0.104107	0.0611707	0.775877	0.162953	0.205346	0.180444	0.458966	0.155244	0.0265463	0.000325112	0.937716	0.0354123	0.0985438	0.0463606	0.764805
187	32202.2	0	0.986792	0.985632	-30968.7	1232.04	Standard of care	0.0177454	0.427548	32202.2	0.417811	60.6206	0.0562139	0.04605	0.096665	0.857285	0.263662	0.0126672	0.723671	0.0371506	0.0859068	0.876943	0.00922259	0.0936697	0.897108	0.37743	0.358187	0.127367	0.455571	0.0146809	0.0146878	0.417863	0.428014	0.80252	0.121779	0.0566387	0.815663	0.127699	0.267538	0.152889	0.492551	0.0870219	0.058459	0.0117536	0.887964	0.0418233	0.138479	0.0610073	0.733701
188	31256.4	0	1.26722	1.2695	-29672.4	1586.88	Standard of care	0.00884036	0.463638	31256.4	0.498259	60.1583	0.0172447	0.0566044	0.184618	0.758778	0.282314	0.121954	0.595731	0.0268189	0.0101774	0.963004	0.0138073	0.106773	0.87942	0.364165	0.72009	0.133366	0.428589	0.0189174	0.0189671	0.49846	0.464071	0.858016	0.0722795	0.0761119	0.83694	0.0869481	0.295031	0.214432	0.334025	0.156511	0.018846	0.00404751	0.960526	0.01658	0.0989664	0.0891375	0.747249
189	31788.4	0	3.297	3.30283	-27667.2	4128.54	Standard of care	0.0107259	0.420511	31788.4	0.481325	61.4839	0.0512619	0.0104631	0.193879	0.795658	0.290626	0.0426343	0.66674	0.0182267	0.0256076	0.956166	0.04657	0.0587654	0.894665	0.396769	0.806682	0.124524	0.492	0.0493689	0.049467	0.481427	0.421047	0.81955	0.11426	0.0755959	0.793465	0.130939	0.267227	0.149035	0.5335	0.0502376	0.0415453	0.00396881	0.898643	0.0558426	0.186878	0.0892016	0.582065
190	31126.6	0	2.12995	2.13221	-28464.2	2665.26	Standard of care	0.0105514	0.454623	31126.6	0.494254	59.3267	0.0343214	0.0438669	0.181152	0.774981	0.202958	0.0294635	0.767579	0.034284	0.0133678	0.952348	0.0278359	0.0851795	0.886985	0.411092	0.88756	0.127925	0.478202	0.0318628	0.031912	0.49432	0.455098	0.828186	0.104863	0.0745032	0.767516	0.157981	0.300545	0.105507	0.46491	0.129039	0.0365729	0.00304718	0.897524	0.0628555	0.197244	0.0860901	0.615141
191	28393.9	0	3.84274	3.84377	-23590.5	4804.71	Standard of care	0.00766639	0.423255	28393.9	0.44527	56.1935	0.0386116	0.02468	0.140781	0.834539	0.244578	0.010752	0.74467	0.0412384	0.0214276	0.937334	0.0520475	0.129536	0.818417	0.367834	0.714125	0.124942	0.454383	0.0575798	0.0576113	0.445288	0.423552	0.832753	0.0888858	0.114531	0.821875	0.0635935	0.192459	0.119706	0.492539	0.195296	0.0830122	0.000992622	0.891688	0.0243069	0.124866	0.0830913	0.717307
192	29444.5	0	3.25516	3.25503	-25375.6	4068.78	Standard of care	0.00854861	0.4435	29444.5	0.441172	57.3	0.0401163	0.04048	0.197318	0.762202	0.23752	0.0432109	0.719269	0.0362441	0.0183117	0.945444	0.0455259	0.0689165	0.885558	0.400728	0.693915	0.141377	0.496479	0.0487593	0.0487664	0.44126	0.443906	0.829785	0.0884417	0.0910968	0.76059	0.148314	0.233036	0.0924749	0.5064	0.168088	0.0554724	0.00107414	0.919795	0.0236583	0.163487	0.0687689	0.623512
193	28510.4	0	2.31617	2.31472	-25615.2	2893.41	Standard of care	0.012033	0.480295	28510.4	0.46002	58.3715	0.054775	0.0778357	0.187954	0.73421	0.204801	0.0630012	0.732198	0.0154853	0.0488629	0.935652	0.0307496	0.0756649	0.893585	0.300173	0.557594	0.127562	0.467479	0.0346282	0.0346209	0.460187	0.480841	0.824091	0.113233	0.067163	0.814798	0.118039	0.297097	0.127343	0.450155	0.125405	0.0183769	0.000935968	0.908689	0.0719984	0.171812	0.0741323	0.666712
194	30124	0	1.26432	1.2645	-28543.6	1580.62	Standard of care	0.0106852	0.46954	30124	0.472481	61.7808	0.0571439	0.0441403	0.183445	0.772415	0.20688	0.115086	0.678034	0.033747	0.0170671	0.949186	0.0139374	0.102173	0.883889	0.363668	0.722077	0.137608	0.47733	0.0188422	0.0188629	0.472748	0.470009	0.799635	0.122238	0.0934775	0.793407	0.113116	0.203597	0.22577	0.490255	0.0803773	0.047202	0.00109059	0.892732	0.0589758	0.148597	0.0957928	0.669662
195	29459.1	0	0.660445	0.668908	-28633.5	836.135	Standard of care	0.0145934	0.424716	29459.1	0.483716	58.9837	0.0258229	0.0232054	0.14325	0.833545	0.315571	0.0581892	0.626239	0.0325902	0.00984979	0.95756	0.00556902	0.0689499	0.925481	0.349774	0.675014	0.12776	0.517095	0.00980753	0.00995113	0.483913	0.425222	0.799937	0.0981104	0.0549772	0.819007	0.126016	0.228301	0.150967	0.506888	0.113844	0.0485004	0.000462477	0.930997	0.0200396	0.101298	0.0683786	0.751524
196	29617.3	0	3.33191	3.32815	-25452.5	4160.19	Standard of care	0.00980878	0.470976	29617.3	0.401553	61.8456	0.0106656	0.0723376	0.142975	0.784687	0.217235	0.00846212	0.774302	0.0412153	0.00622975	0.952555	0.046307	0.0740672	0.879626	0.327066	0.573578	0.125679	0.471898	0.0499307	0.0498846	0.401574	0.471318	0.830343	0.104211	0.0211795	0.853148	0.125672	0.299177	0.0996641	0.538086	0.0630723	0.0741328	0.000298965	0.904449	0.0211188	0.18832	0.0303719	0.707518
197	29252.1	0	3.52864	3.52739	-24841.3	4409.23	Standard of care	0.00715435	0.447501	29252.1	0.425129	63.2762	0.0523618	0.0207664	0.196377	0.782857	0.24279	0.0532609	0.703949	0.0183298	0.0155874	0.966083	0.049842	0.0676424	0.882516	0.323094	0.797319	0.130531	0.519131	0.0528705	0.0528593	0.425228	0.447825	0.762552	0.168998	0.105414	0.780376	0.114211	0.221201	0.251291	0.435297	0.0922119	0.0590215	0.000263199	0.921891	0.0188243	0.195953	0.0892637	0.67446
198	30570.3	0	1.73288	1.73599	-28404.2	2169.99	Standard of care	0.0114903	0.414958	30570.3	0.459465	58.8726	0.0508507	0.0984858	0.192974	0.70854	0.243394	0.0434538	0.713153	0.0494739	0.0211711	0.929355	0.0213556	0.0819314	0.896713	0.334914	0.648917	0.133799	0.469535	0.0258857	0.0259466	0.459575	0.415555	0.781189	0.166754	0.0903063	0.742392	0.167302	0.283625	0.162647	0.408802	0.144925	0.0555368	0.00575314	0.925863	0.0128475	0.175784	0.102384	0.639706
199	31567.3	0	1.55089	1.54859	-29628.7	1935.74	Standard of care	0.0104678	0.470652	31567.3	0.448655	57.7942	0.0218246	0.0668187	0.135621	0.797561	0.335488	0.0346611	0.629851	0.0188851	0.00463216	0.976483	0.016256	0.141428	0.842316	0.383909	0.735723	0.13933	0.474245	0.0231806	0.0231703	0.448736	0.470992	0.855302	0.0961542	0.109966	0.81432	0.0757148	0.28486	0.127002	0.459315	0.128823	0.0601185	1.44597e-05	0.907575	0.0322917	0.207413	0.0534746	0.653098
200	32351.1	0	1.12156	1.11629	-30949.2	1395.36	Standard of care	0.0162461	0.431379	32351.1	0.391668	60.0054	0.0101269	0.026846	0.114173	0.858981	0.264503	0.0507608	0.684736	0.016431	0.0327492	0.95082	0.0123143	0.0749081	0.912778	0.386017	0.77679	0.129257	0.4939	0.0167293	0.0166682	0.391884	0.431844	0.789799	0.0997905	0.0985784	0.766523	0.134899	0.260702	0.170692	0.471291	0.0973155	0.0208539	0.0020417	0.942925	0.0341798	0.139725	0.11079	0.692636
201	30949.1	0	3.1808	3.18564	-26973.1	3982.05	Standard of care	0.00596839	0.449872	30949.1	0.516495	59.5792	0.0207954	0.0292056	0.176585	0.79421	0.396788	0.0122744	0.590937	0.0169029	0.00970682	0.97339	0.0441781	0.0756136	0.880208	0.395836	0.351393	0.138997	0.482791	0.0476737	0.0477549	0.51651	0.45013	0.867327	0.0468799	0.132819	0.745792	0.121389	0.287398	0.106792	0.490219	0.115591	0.121022	0.0159091	0.829388	0.0336812	0.154458	0.0752345	0.719887
202	27972.8	0	1.30976	1.31169	-26335.6	1639.62	Standard of care	0.0124214	0.465378	27972.8	0.491986	54.3369	0.0133073	0.0326711	0.182511	0.784818	0.189001	0.0272592	0.78374	0.0171759	0.00841966	0.974404	0.0160147	0.0706828	0.913303	0.386485	0.519074	0.137301	0.509493	0.0195592	0.0196036	0.492062	0.465891	0.847541	0.112298	0.0599445	0.833172	0.106884	0.273931	0.105584	0.496797	0.123688	0.117354	1.4401e-07	0.812597	0.070049	0.171358	0.0760254	0.676042
203	29720.6	0	2.03689	2.03418	-27174.5	2542.73	Standard of care	0.0117223	0.44101	29720.6	0.409315	55.6714	0.0152844	0.0524151	0.139115	0.80847	0.261368	0.0500885	0.688543	0.0221134	0.00500894	0.972878	0.0263742	0.078712	0.894914	0.357572	0.752668	0.125184	0.45216	0.0304796	0.0304532	0.409453	0.441446	0.734493	0.198032	0.130152	0.763399	0.106449	0.215444	0.129994	0.517892	0.136671	0.0597877	0.000900512	0.908182	0.0311295	0.10008	0.0404261	0.729642
204	29435.5	0	1.8374	1.84182	-27138.8	2302.27	Standard of care	0.00892199	0.445832	29435.5	0.52147	58.7783	0.0129261	0.0434214	0.258626	0.697952	0.228932	0.0478009	0.723267	0.0238901	0.0471169	0.928993	0.0249114	0.0503834	0.924705	0.321942	0.66915	0.126439	0.479649	0.0274736	0.0275477	0.521556	0.446413	0.759743	0.140199	0.115402	0.787076	0.097522	0.195628	0.127013	0.523518	0.153841	0.0811389	0.00124355	0.87144	0.046178	0.0684024	0.104499	0.716571
205	31675.4	0	3.14033	3.14435	-27750	3930.44	Standard of care	0.013981	0.424609	31675.4	0.456567	59.3392	0.005788	0.0714823	0.208693	0.719825	0.3393	0.0755034	0.585196	0.0683796	0.0251572	0.906463	0.0410161	0.111489	0.847495	0.347548	0.500742	0.136584	0.494993	0.0469795	0.0470629	0.456812	0.425341	0.850461	0.094531	0.0403034	0.868362	0.0913344	0.274464	0.126273	0.509596	0.0896667	0.0457596	0.00120182	0.938737	0.0143014	0.110363	0.0392218	0.775885
206	30630.3	0	1.61386	1.61936	-28613	2024.2	Standard of care	0.0112847	0.421324	30630.3	0.476566	62.335	0.0168029	0.029727	0.166117	0.804156	0.298369	0.0303278	0.671303	0.0233571	0.0431274	0.933516	0.0206414	0.0644376	0.914921	0.360382	0.672341	0.138779	0.48397	0.0241257	0.0242207	0.476641	0.421806	0.775497	0.125637	0.0688964	0.85095	0.0801535	0.31644	0.123368	0.458924	0.101267	0.0478791	0.00881194	0.90741	0.0358986	0.135924	0.0851553	0.670059
207	29692	0	4.73529	4.73664	-23772.9	5920.81	Standard of care	0.0107244	0.44935	29692	0.474345	63.772	0.0384512	0.0568517	0.0648701	0.878278	0.207249	0.0938871	0.698864	0.0491161	0.0364957	0.914388	0.0656684	0.122785	0.811546	0.412016	0.42276	0.128702	0.470551	0.0709607	0.0710035	0.474562	0.449527	0.806895	0.133548	0.046478	0.87258	0.0809424	0.227732	0.178161	0.459672	0.134435	0.0871863	8.66249e-05	0.88906	0.0236667	0.232469	0.0569376	0.60562
208	29259.9	0	1.22228	1.2292	-27732.1	1536.49	Standard of care	0.0166387	0.381456	29259.9	0.433548	58.3424	0.0130879	0.04705	0.244784	0.708166	0.262027	0.0614318	0.676541	0.00701374	0.0466239	0.946362	0.0138512	0.0721826	0.913966	0.333769	0.558943	0.134147	0.468852	0.018162	0.0182828	0.433783	0.382615	0.844384	0.0882075	0.0440203	0.861908	0.0940717	0.274019	0.159283	0.407497	0.159201	0.0844955	0.00919221	0.881221	0.0250913	0.105381	0.113972	0.657693
209	29926.2	0	0.97089	0.972609	-28712.6	1215.76	Standard of care	0.0107113	0.444921	29926.2	0.471157	55.3108	0.0479574	0.0631659	0.189832	0.747002	0.264394	0.0562534	0.679353	0.0695878	0.0283659	0.902046	0.0085603	0.116468	0.874971	0.319714	0.642202	0.135977	0.469424	0.0144461	0.0144915	0.471287	0.445439	0.868589	0.0915066	0.0712043	0.781565	0.14723	0.236906	0.161877	0.488511	0.112706	0.0561475	0.000134437	0.892714	0.0510041	0.132375	0.0686133	0.726998
210	32021	0	1.58604	1.58924	-30038.5	1986.55	Standard of care	0.0112991	0.43983	32021	0.471027	57.9347	0.00848569	0.0388201	0.187503	0.773677	0.278618	0.0217349	0.699647	0.0112794	0.00149751	0.987223	0.019896	0.0722733	0.907831	0.315589	0.819844	0.130621	0.509239	0.0237137	0.0237755	0.471084	0.440336	0.831939	0.109029	0.141251	0.745153	0.113597	0.226804	0.131966	0.529662	0.111568	0.0633928	5.10243e-06	0.896576	0.0400265	0.156793	0.141694	0.618405
211	31418.2	0	2.36842	2.37176	-28457.7	2964.7	Standard of care	0.0087359	0.433902	31418.2	0.483374	55.1071	0.0159477	0.0530296	0.180833	0.766137	0.259113	0.0129964	0.727891	0.00241715	0.0217594	0.975823	0.0317282	0.078914	0.889358	0.395157	0.737134	0.130577	0.454639	0.0354631	0.0355251	0.483397	0.434326	0.877285	0.0583452	0.118508	0.73407	0.147422	0.211363	0.162468	0.508793	0.117376	0.0647955	0.00121253	0.870105	0.0638873	0.164078	0.0862214	0.703464
212	30626.8	0	2.61812	2.62601	-27354.1	3282.52	Standard of care	0.0118272	0.440535	30626.8	0.521131	57.9592	0.0385498	0.0322413	0.159305	0.808454	0.261776	0.0285188	0.709705	0.010067	0.0328026	0.95713	0.0372714	0.0345602	0.928168	0.33	0.595839	0.138429	0.494754	0.0392002	0.0393264	0.5212	0.440993	0.83343	0.106172	0.133937	0.758056	0.108007	0.273229	0.134329	0.514765	0.077677	0.0279015	0.000302166	0.935278	0.0365187	0.118207	0.0572658	0.711931
213	28741.4	0	2.89752	2.8989	-25119.5	3623.62	Standard of care	0.00906639	0.435919	28741.4	0.456432	59.7955	0.0313433	0.0559836	0.144759	0.799257	0.239541	0.0697965	0.690662	0.0253172	0.017167	0.957516	0.0397917	0.0750413	0.885167	0.360267	0.45611	0.136626	0.510954	0.0434007	0.0434322	0.456584	0.436232	0.892498	0.0826212	0.0655719	0.834177	0.100251	0.269109	0.152688	0.457797	0.120406	0.0410742	0.00257153	0.881667	0.0746877	0.102531	0.054668	0.767376
214	30450.8	0	1.92202	1.91967	-28048.2	2399.59	Standard of care	0.0173137	0.413303	30450.8	0.39232	58.6935	0.0554177	0.045879	0.205063	0.749058	0.215121	0.0414187	0.74346	0.0230401	0.0108165	0.966143	0.0197512	0.186927	0.793322	0.364351	0.800587	0.134467	0.504911	0.0286269	0.0286367	0.39251	0.414196	0.743943	0.172141	0.125762	0.78214	0.0920981	0.207947	0.188551	0.445803	0.157699	0.0360709	0.0149309	0.91029	0.0387084	0.286576	0.110768	0.542638
215	30899.1	0	0.646529	0.656239	-30091	820.299	Standard of care	0.0104757	0.389816	30899.1	0.527034	58.4613	0.032743	0.0325105	0.135158	0.832332	0.245408	0.0564474	0.698144	0.0214359	0.0275603	0.951004	0.00553321	0.0821561	0.912311	0.408816	0.560011	0.123998	0.450473	0.00961438	0.00977543	0.527144	0.390232	0.806346	0.130423	0.076683	0.723729	0.199588	0.299457	0.18708	0.392831	0.120632	0.0771042	0.0302725	0.848318	0.0443055	0.147809	0.112501	0.701258
216	31176.5	0	2.36989	2.36995	-28214.1	2962.44	Standard of care	0.0130912	0.462113	31176.5	0.463073	59.6776	0.0390579	0.061495	0.108159	0.830346	0.20788	0.0786576	0.713462	0.044868	0.0253487	0.929783	0.0317367	0.0724544	0.895809	0.372852	0.646769	0.126685	0.411354	0.035462	0.0354786	0.463272	0.462505	0.853464	0.0939083	0.0965178	0.781057	0.122425	0.239938	0.12802	0.495481	0.136561	0.0478147	0.0044982	0.882577	0.0651104	0.177646	0.0562284	0.646025
217	29484.3	0	2.17869	2.17863	-26761	2723.28	Standard of care	0.00770562	0.453528	29484.3	0.452297	59.1247	0.0426771	0.0526013	0.207633	0.739766	0.241914	0.0112076	0.746879	0.00986516	0.017445	0.97269	0.0292072	0.0715785	0.899214	0.330208	0.930048	0.122016	0.45983	0.0326123	0.0326199	0.452316	0.453943	0.807281	0.0654073	0.0968692	0.802939	0.100192	0.2718	0.122527	0.522701	0.0829723	0.0354178	0.0258863	0.878239	0.0604567	0.236328	0.0671951	0.585072
218	31420.7	0	2.52737	2.52828	-28261.5	3160.35	Standard of care	0.0103126	0.418542	31420.7	0.435564	59.2419	0.0572071	0.0408854	0.173166	0.785949	0.197274	0.0346981	0.768028	0.0447011	0.0300587	0.92524	0.0325441	0.115302	0.852154	0.383565	0.645107	0.12592	0.512431	0.0378107	0.0378426	0.435654	0.418985	0.803157	0.120378	0.121915	0.785755	0.0923299	0.300191	0.091013	0.489998	0.118797	0.0259839	0.00820845	0.947016	0.0187918	0.100642	0.0759879	0.755117
219	28927.2	0	3.40971	3.41037	-24665	4262.96	Standard of care	0.0102633	0.421406	28927.2	0.432444	58.5832	0.00814715	0.0492427	0.159894	0.790864	0.206483	0.0480673	0.74545	0.0191382	0.0354467	0.945415	0.0459028	0.116783	0.837315	0.378785	0.467693	0.131155	0.470899	0.0510717	0.0511	0.432558	0.421843	0.859402	0.101113	0.0427282	0.770662	0.18661	0.274312	0.114555	0.485543	0.12559	0.0477884	0.0251794	0.818301	0.108731	0.136466	0.0718021	0.735739
220	31575.4	0	1.31984	1.31844	-29925.6	1648.05	Standard of care	0.00828146	0.447094	31575.4	0.426764	59.579	0.0522839	0.0421105	0.175936	0.781953	0.278265	0.0311106	0.690624	0.0276249	0.00941987	0.962955	0.0140385	0.120183	0.865779	0.370845	0.525938	0.130676	0.49652	0.0197106	0.0197049	0.426828	0.447447	0.821118	0.100849	0.0596029	0.806503	0.133894	0.265004	0.141936	0.49954	0.0935201	0.0834156	0.000911103	0.849141	0.0665326	0.211406	0.0445293	0.676277
221	29002.3	0	1.35255	1.35439	-27311.6	1692.99	Standard of care	0.0100119	0.452048	29002.3	0.480852	56.5217	0.0237133	0.0541038	0.17946	0.766437	0.212327	0.0245818	0.763091	0.0210365	0.00789058	0.971073	0.0162226	0.0803379	0.903439	0.394339	0.689823	0.139595	0.499331	0.0202126	0.0202539	0.480907	0.452472	0.818124	0.0846205	0.0411649	0.747291	0.211544	0.208863	0.173743	0.460216	0.157178	0.0229704	0.0523348	0.901863	0.0228314	0.152967	0.0890742	0.657384
222	30131.6	0	2.93811	2.93763	-26458.9	3672.04	Standard of care	0.0143923	0.476321	30131.6	0.469017	56.8103	0.0470496	0.0626872	0.125994	0.811319	0.192014	0.0414857	0.7665	0.0363223	0.0608948	0.902783	0.0396683	0.0884146	0.871917	0.311894	0.577639	0.128542	0.448973	0.0439652	0.0439787	0.469141	0.476777	0.769346	0.125422	0.0526768	0.794278	0.153046	0.278705	0.18607	0.412992	0.122233	0.0170073	2.84768e-05	0.930685	0.0522791	0.095604	0.0800234	0.745047
223	30542.8	0	1.50419	1.51204	-28662.5	1890.05	Standard of care	0.0149537	0.443456	30542.8	0.525698	58.7011	0.0150704	0.0438547	0.233758	0.722388	0.25696	0.0279981	0.715042	0.0487646	0.00684849	0.944387	0.0163765	0.12065	0.862973	0.353684	0.805155	0.129255	0.459862	0.0224088	0.022558	0.525777	0.444371	0.879214	0.0585486	0.0920697	0.75433	0.1536	0.314557	0.1873	0.405495	0.0926488	0.105587	0.010924	0.852847	0.0306418	0.146822	0.0536815	0.735944
224	31700.9	0	0.798822	0.808239	-30702.4	1010.3	Standard of care	0.0226751	0.44717	31700.9	0.506559	53.8788	0.0137611	0.0421654	0.115739	0.842095	0.251565	0.0464669	0.701968	0.0283035	0.00764589	0.964051	0.00793726	0.0524685	0.939594	0.342314	0.624228	0.131819	0.465911	0.011861	0.0120231	0.50677	0.447843	0.834304	0.0856476	0.0819138	0.819828	0.0982578	0.289924	0.130056	0.500633	0.0793868	0.0599284	0.00105796	0.925306	0.0137075	0.110382	0.0774056	0.711301
225	31711.3	0	3.54371	3.54428	-27281.7	4430.35	Standard of care	0.0127638	0.448898	31711.3	0.454921	57.897	0.0200683	0.0767812	0.140193	0.783025	0.276034	0.0243793	0.699586	0.015077	0.00546841	0.979455	0.0477173	0.111404	0.840879	0.320504	0.625379	0.13706	0.430356	0.0530699	0.0531015	0.454984	0.449383	0.833477	0.118782	0.0806511	0.76429	0.155058	0.245613	0.183906	0.387444	0.183037	0.0448188	0.00100817	0.910192	0.043981	0.158462	0.0941337	0.675396
226	29095.2	0	3.05015	3.04912	-25282.5	3811.4	Standard of care	0.00877153	0.468525	29095.2	0.451316	60.048	0.0214876	0.054253	0.153114	0.792633	0.270422	0.0484276	0.681151	0.0511695	0.0297297	0.919101	0.0408635	0.103518	0.855618	0.324731	0.779922	0.137687	0.465165	0.0456864	0.0456853	0.451409	0.468854	0.874242	0.0793927	0.0806543	0.841759	0.0775868	0.265847	0.153055	0.442621	0.138477	0.0588031	0.000635531	0.923942	0.016619	0.157322	0.126925	0.6023
227	28168.7	0	2.15733	2.16045	-25472.1	2700.57	Standard of care	0.00928935	0.416409	28168.7	0.467958	59.364	0.0413441	0.0351178	0.156552	0.80833	0.211645	0.0371609	0.751194	0.0183068	0.0320021	0.949691	0.0293967	0.0597634	0.91084	0.38935	0.612075	0.119872	0.505921	0.0322956	0.0323517	0.46804	0.416779	0.816115	0.142467	0.0778651	0.778537	0.143598	0.289084	0.166762	0.423547	0.120607	0.0430636	0.00188111	0.894176	0.0608792	0.162426	0.150309	0.647446
228	29923.2	0	1.60193	1.60765	-27920.7	2009.56	Standard of care	0.0151035	0.448294	29923.2	0.495278	57.8863	0.0490026	0.0452813	0.152274	0.802445	0.262978	0.054091	0.682931	0.0230621	0.0178515	0.959086	0.0211041	0.0420087	0.936887	0.316182	0.789324	0.13447	0.499794	0.0239295	0.0240259	0.495457	0.448844	0.860665	0.0919676	0.122916	0.715005	0.162079	0.328805	0.0981887	0.438266	0.134741	0.090627	0.0142868	0.868667	0.0264193	0.129221	0.0805677	0.770855
229	32744.1	0	1.45219	1.47079	-30928.9	1838.48	Standard of care	0.0182569	0.360705	32744.1	0.50254	61.9152	0.0297002	0.0400637	0.1568	0.803136	0.256028	0.0142436	0.729728	0.014597	0.0124024	0.973001	0.0150782	0.130931	0.853991	0.329347	0.855398	0.128899	0.448586	0.021626	0.0219483	0.502591	0.361584	0.79465	0.133354	0.0608789	0.803836	0.135285	0.247443	0.147122	0.468613	0.136822	0.0554943	0.00666072	0.882946	0.0548991	0.130093	0.0980065	0.699066
230	30652.6	0	2.5084	2.5057	-27517.1	3132.12	Standard of care	0.0184355	0.474692	30652.6	0.455137	56.9912	0.0157404	0.0663346	0.163607	0.770058	0.247435	0.0526024	0.699963	0.0213562	0.0296526	0.948991	0.0327302	0.0842903	0.882979	0.359402	0.734382	0.126533	0.495603	0.0374918	0.0374765	0.455365	0.47539	0.848962	0.107948	0.0939886	0.744509	0.161503	0.203416	0.121027	0.53312	0.142437	0.0221145	0.00037355	0.881062	0.0964495	0.149476	0.108364	0.699418
231	31026.2	0	1.54062	1.55253	-29100.5	1940.66	Standard of care	0.0183177	0.437948	31026.2	0.518042	59.3156	0.0239732	0.0890781	0.161553	0.749368	0.248743	0.0148924	0.736364	0.0176852	0.025346	0.956969	0.0150965	0.150638	0.834266	0.292617	0.570318	0.136675	0.532036	0.0229536	0.0231832	0.518102	0.43862	0.795955	0.0847631	0.0762295	0.788978	0.134792	0.256835	0.152272	0.511061	0.0798325	0.0355663	0.00241608	0.872595	0.0894225	0.0783924	0.0848202	0.732237
232	27633.6	0	1.73525	1.72652	-25464.6	2158.16	Standard of care	0.0172231	0.463482	27633.6	0.412217	57.7249	0.0186312	0.055943	0.140308	0.803749	0.325304	0.0491653	0.625531	0.0192969	0.0175262	0.963177	0.0205797	0.086817	0.892603	0.405185	0.877083	0.13443	0.483279	0.0259134	0.0258055	0.412425	0.464062	0.792607	0.100357	0.0641073	0.785349	0.150544	0.243722	0.241917	0.372299	0.142061	0.0210538	1.07489e-07	0.946354	0.0325924	0.138837	0.0730807	0.724293
233	29472.3	0	2.40519	2.40868	-26465.8	3010.84	Standard of care	0.00843447	0.433665	29472.3	0.485638	60.8331	0.0375999	0.073196	0.181351	0.745453	0.287824	0.0236883	0.688488	0.0388548	0.0196668	0.941478	0.0320054	0.0802135	0.887781	0.322001	0.395066	0.138956	0.48034	0.0360088	0.0360723	0.485681	0.434052	0.831993	0.0988526	0.035869	0.877303	0.0868278	0.288103	0.153182	0.439047	0.119667	0.0352394	0.000373349	0.912512	0.0518757	0.147114	0.079644	0.721925
234	28404.6	0	5.30941	5.30784	-21767.8	6634.8	Standard of care	0.0118906	0.498349	28404.6	0.46719	56.6974	0.0497756	0.0582347	0.165333	0.776432	0.216004	0.0448763	0.739119	0.086948	0.0245036	0.888548	0.0752219	0.0971756	0.827602	0.308066	0.87803	0.121063	0.490591	0.0795505	0.0795455	0.467313	0.49879	0.800775	0.127868	0.0890931	0.802633	0.108274	0.254138	0.133142	0.546225	0.0664945	0.0287028	0.00575424	0.90182	0.063723	0.115186	0.04555	0.752867
235	31072.5	0	1.27654	1.2776	-29476.9	1596.99	Standard of care	0.0105667	0.424184	31072.5	0.43681	59.7509	0.0513714	0.068597	0.152059	0.779344	0.261262	0.0415704	0.697167	0.0133693	0.00572177	0.980909	0.0138357	0.103301	0.882863	0.347613	0.717125	0.125791	0.477756	0.0190546	0.0190875	0.436913	0.424606	0.882293	0.0782283	0.102253	0.772421	0.125326	0.256677	0.116445	0.472696	0.154183	0.0363787	0.00115967	0.90821	0.054252	0.180687	0.0640983	0.658594
236	31976.6	0	0.970327	0.970018	-30763.7	1212.52	Standard of care	0.00465732	0.441291	31976.6	0.429565	56.5838	0.0238923	0.0467864	0.118987	0.834226	0.194317	0.0724506	0.733233	0.00608865	0.00296269	0.990949	0.00999502	0.102952	0.887053	0.347709	0.747096	0.139597	0.4433	0.0145165	0.0145196	0.429638	0.441439	0.81696	0.0703918	0.0451206	0.811464	0.143415	0.168033	0.124957	0.605594	0.101416	0.0322575	0.0101396	0.897395	0.0602083	0.150912	0.0739642	0.703658
237	31735.8	0	1.46413	1.46469	-29905.7	1830.87	Standard of care	0.0130992	0.464357	31735.8	0.469282	57.9201	0.0123385	0.0466651	0.142468	0.810867	0.29698	0.0464001	0.65662	0.0235391	0.0305928	0.945868	0.0188934	0.0454867	0.93562	0.394768	0.899965	0.141748	0.480301	0.0218818	0.0219003	0.469415	0.464803	0.875952	0.0990488	0.0663042	0.772482	0.161214	0.274073	0.190515	0.432498	0.102913	0.0404233	0.00102261	0.873141	0.0854127	0.123545	0.126589	0.700722
238	29002.4	0	2.95923	2.96152	-25303.4	3701.9	Standard of care	0.0128694	0.418248	29002.4	0.446433	60.5479	0.0155675	0.0378684	0.111616	0.850516	0.254027	0.026549	0.719424	0.0400778	0.0332717	0.926651	0.0396542	0.0979132	0.862433	0.372343	0.643989	0.127851	0.446189	0.0443145	0.0443693	0.446506	0.418652	0.861388	0.0899134	0.0603774	0.854038	0.0855848	0.222298	0.134595	0.514208	0.128899	0.0498911	0.0035036	0.902672	0.0439333	0.097897	0.0709705	0.76365
239	30177.2	0	0.858473	0.857455	-29104.1	1071.82	Standard of care	0.00435506	0.437426	30177.2	0.407636	57.3107	0.052209	0.0940706	0.179305	0.726624	0.307944	0.0274129	0.664643	0.0403966	0.0100563	0.949547	0.00856164	0.0901951	0.901243	0.412037	0.800753	0.133635	0.439763	0.0128259	0.0128161	0.407663	0.43764	0.838517	0.129069	0.0474389	0.786946	0.165615	0.224936	0.168982	0.446132	0.15995	0.0192738	0.0190458	0.896178	0.065502	0.198799	0.0622453	0.66545
240	30341.5	0	1.1673	1.17654	-28882.3	1470.67	Standard of care	0.00998283	0.395595	30341.5	0.502254	61.9201	0.039409	0.041911	0.120411	0.837678	0.293609	0.0385175	0.667874	0.0259831	0.0233451	0.950672	0.0133361	0.0796328	0.907031	0.380072	0.832345	0.12969	0.486079	0.0174392	0.0175919	0.502335	0.39592	0.823654	0.083033	0.082666	0.769864	0.14747	0.2164	0.137622	0.510957	0.13502	0.0153782	0.0357938	0.910801	0.0380269	0.131244	0.0749297	0.676657
241	30350.5	0	1.88334	1.88134	-27996.3	2351.67	Standard of care	0.00971407	0.448462	30350.5	0.41421	59.529	0.0566366	0.0197608	0.227058	0.753181	0.197427	0.0596813	0.742892	0.0109756	0.0124198	0.976605	0.0248919	0.0695355	0.905573	0.363884	0.726768	0.125479	0.47743	0.0281501	0.0281304	0.414352	0.449018	0.836443	0.0584655	0.106829	0.756594	0.136577	0.249272	0.191798	0.454207	0.104724	0.0597056	0.00651076	0.875671	0.0581126	0.168738	0.0616431	0.678947
242	28855.4	0	1.52356	1.52315	-26950.9	1903.94	Standard of care	0.0112456	0.43787	28855.4	0.431243	53.4823	0.0175857	0.0526322	0.200319	0.747049	0.185012	0.0651358	0.749852	0.0202627	0.0210948	0.958643	0.0179634	0.0993537	0.882683	0.299898	0.77525	0.129624	0.501613	0.0227537	0.0227645	0.431425	0.43842	0.829773	0.0953114	0.0750585	0.728677	0.196264	0.256915	0.134777	0.507047	0.101261	0.0397237	0.00079911	0.919127	0.0403499	0.130962	0.0910256	0.688658
243	29386.6	0	0.919314	0.922149	-28237.4	1152.69	Standard of care	0.0128586	0.418037	29386.6	0.450095	58.1425	0.0254227	0.0344332	0.147227	0.81834	0.268726	0.0244004	0.706874	0.0656586	0.0117361	0.922605	0.00943187	0.0741045	0.916464	0.317282	0.717	0.122896	0.507736	0.0137072	0.0137649	0.450172	0.418513	0.820236	0.0682468	0.0628616	0.808028	0.129111	0.232462	0.123948	0.490057	0.153533	0.031152	0.00479897	0.919383	0.0446657	0.0753345	0.117627	0.729115
244	28760.7	0	1.898	1.89569	-26388.2	2369.61	Standard of care	0.0099797	0.417403	28760.7	0.378227	61.2272	0.0354808	0.0593961	0.162396	0.778208	0.248568	0.0587731	0.692659	0.0571741	0.0160552	0.926771	0.0215136	0.145588	0.832898	0.404107	0.592699	0.146428	0.458909	0.0283698	0.0283548	0.37837	0.417839	0.794631	0.100452	0.0984376	0.783761	0.117801	0.27094	0.211238	0.448993	0.0688291	0.0438212	0.00321736	0.907991	0.0449706	0.101717	0.0626336	0.754891
245	31757.3	0	2.54333	2.54697	-28578.2	3183.72	Standard of care	0.00876632	0.42686	31757.3	0.467424	62.8085	0.0371046	0.0547267	0.142141	0.803132	0.328917	0.0417005	0.629383	0.0121762	0.0144314	0.973392	0.0326955	0.114011	0.853293	0.348682	0.763794	0.119914	0.485216	0.0380781	0.0381495	0.467507	0.427184	0.844011	0.0911741	0.0810234	0.821077	0.0978991	0.304107	0.138222	0.455326	0.102345	0.0449474	0.0252036	0.900203	0.0296458	0.103672	0.0982235	0.731982
246	31546.2	0	3.61516	3.61958	-27027.3	4524.47	Standard of care	0.00792917	0.445588	31546.2	0.528139	59.7672	0.0119759	0.0416458	0.157559	0.800795	0.253425	0.0769447	0.66963	0.0370376	0.0140206	0.948942	0.0516606	0.054873	0.893466	0.322468	0.507185	0.12635	0.46091	0.05418	0.0542534	0.528255	0.445914	0.833624	0.0880188	0.112788	0.783378	0.103834	0.232909	0.146855	0.494654	0.125582	0.0202054	1.89723e-05	0.896342	0.0834334	0.181061	0.0883566	0.654062
247	30696.3	0	2.15412	2.16345	-28003.6	2704.32	Standard of care	0.0122053	0.393205	30696.3	0.488936	60.6278	0.0369903	0.029518	0.122043	0.848439	0.262291	0.0191215	0.718588	0.0226002	0.0313396	0.94606	0.028533	0.0731881	0.898279	0.348883	0.833032	0.132485	0.502895	0.0322381	0.0323946	0.488988	0.393595	0.844942	0.0913395	0.0990089	0.748668	0.152323	0.210124	0.126636	0.558829	0.104411	0.0550915	0.00084831	0.864896	0.0791639	0.150514	0.0718608	0.626161
248	28859.6	0	0.885129	0.885187	-27753.2	1106.48	Standard of care	0.0188649	0.455684	28859.6	0.456076	61.0691	0.016714	0.0494088	0.104635	0.845956	0.257114	0.0438504	0.699035	0.00815707	0.00514856	0.986694	0.0070139	0.110865	0.882121	0.366963	0.618894	0.135928	0.474373	0.0131594	0.0131959	0.45626	0.456172	0.833041	0.110733	0.0454042	0.824297	0.130298	0.255099	0.114668	0.512017	0.118216	0.0230802	0.000726865	0.941858	0.0343345	0.177077	0.0927077	0.648472
249	29025.3	0	3.72638	3.72506	-24367.3	4656.33	Standard of care	0.014201	0.408074	29025.3	0.394821	54.8302	0.0424149	0.0155836	0.204682	0.779734	0.268093	0.0344138	0.697494	0.050333	0.0107683	0.938899	0.0530354	0.0525997	0.894365	0.399157	0.598525	0.144111	0.480527	0.0557896	0.0557803	0.394943	0.408839	0.857713	0.0685836	0.0425108	0.803167	0.154322	0.339165	0.093463	0.482484	0.0848884	0.047977	0.00015607	0.882031	0.0698357	0.158739	0.0585	0.694194
250	30594.4	0	1.17565	1.18063	-29124.8	1475.79	Standard of care	0.0171595	0.437204	30594.4	0.476821	54.5471	0.0486242	0.0032094	0.116668	0.880122	0.24876	0.0549078	0.696332	0.00853284	0.0150843	0.976383	0.0147189	0.0488469	0.936434	0.374496	0.654721	0.137214	0.454014	0.0175324	0.0176216	0.477014	0.437735	0.873373	0.0583603	0.067885	0.822902	0.109213	0.227596	0.162067	0.520579	0.0897573	0.0424984	1.88252e-05	0.937226	0.0202564	0.192706	0.122183	0.60475
251	28308.9	0	1.38222	1.3914	-26581.2	1739.25	Standard of care	0.0184841	0.448823	28308.9	0.503643	56.0746	0.0442689	0.0350765	0.165239	0.799684	0.314574	0.0111456	0.67428	0.0529002	0.0138808	0.933219	0.0153006	0.0863974	0.898302	0.393589	0.804548	0.134205	0.521493	0.0205993	0.0207658	0.503689	0.44952	0.831193	0.0862396	0.0409157	0.830762	0.128322	0.227267	0.118625	0.578818	0.0752901	0.0221583	1.39022e-05	0.915653	0.0621753	0.0794504	0.0745192	0.747789
252	30892	0	4.4632	4.46107	-25313	5576.34	Standard of care	0.0127924	0.449031	30892	0.428089	56.2667	0.0376357	0.0410358	0.22013	0.738834	0.265336	0.028197	0.706467	0.0193023	0.0281376	0.95256	0.0637363	0.0650927	0.871171	0.404042	0.556215	0.135045	0.487434	0.0668456	0.0668258	0.428176	0.449718	0.731121	0.178944	0.106063	0.723768	0.170168	0.225395	0.256941	0.42467	0.0929936	0.0386047	0.00719996	0.936208	0.0179872	0.0863603	0.0641522	0.754869
253	32510.9	0	2.82496	2.8279	-28979.7	3534.88	Standard of care	0.0123138	0.412958	32510.9	0.439936	63.3793	0.0212497	0.045474	0.0868149	0.867711	0.275433	0.0440732	0.680494	0.0261881	0.00979302	0.964019	0.0391472	0.0568029	0.90405	0.395701	0.578504	0.139881	0.529237	0.0423257	0.042381	0.440075	0.413212	0.869072	0.0804964	0.108336	0.7975	0.0941648	0.241533	0.166606	0.460511	0.131351	0.0401254	0.00454276	0.893769	0.0615631	0.151232	0.086654	0.677692
254	30164.3	0	3.16392	3.16988	-26209.4	3962.35	Standard of care	0.0109518	0.424764	30164.3	0.513531	60.553	0.00684508	0.0147391	0.188017	0.797244	0.212179	0.0477444	0.740076	0.0138866	0.0195343	0.966579	0.0439146	0.0808068	0.875279	0.33274	0.832763	0.127489	0.461347	0.0473752	0.0474802	0.513633	0.425321	0.752739	0.175138	0.103753	0.759461	0.136786	0.285906	0.105197	0.45736	0.151538	0.0232145	0.0185319	0.94752	0.0107333	0.14245	0.102216	0.691655
255	30687.8	0	1.54489	1.54566	-28756.7	1932.08	Standard of care	0.00743732	0.415469	30687.8	0.431757	58.7463	0.0197095	0.0142931	0.153315	0.832392	0.212867	0.0120744	0.775058	0.0159336	0.0100586	0.974008	0.0192943	0.0844856	0.89622	0.359708	0.552356	0.141826	0.489717	0.0231242	0.0231459	0.431778	0.415761	0.833292	0.10084	0.102764	0.797592	0.0996444	0.211178	0.102485	0.495198	0.191139	0.0707197	0.00976583	0.882008	0.0375061	0.104705	0.0790639	0.741438
256	29604.3	0	1.68097	1.68755	-27503.1	2109.44	Standard of care	0.018947	0.45643	29604.3	0.50151	59.5365	0.0265342	0.0865785	0.147692	0.765729	0.265889	0.0654907	0.66862	0.0383745	0.00280433	0.958821	0.0201003	0.0763668	0.903533	0.373992	0.642605	0.146126	0.500805	0.0250818	0.0252046	0.501775	0.457078	0.76299	0.162364	0.116004	0.722029	0.161967	0.28175	0.149443	0.447371	0.121436	0.0546217	0.00078818	0.909875	0.0347151	0.167401	0.0929793	0.69307
257	30393.3	0	2.0384	2.03934	-27845.3	2549.17	Standard of care	0.0142205	0.419711	30393.3	0.42852	60.5854	0.0467136	0.0324838	0.233126	0.73439	0.232606	0.0515192	0.715875	0.0103305	0.00614138	0.983528	0.0267651	0.0697933	0.903442	0.336112	0.738711	0.141307	0.49933	0.0304397	0.0304686	0.428699	0.420538	0.823444	0.107854	0.0709256	0.769924	0.159151	0.245772	0.117696	0.519513	0.117019	0.0605545	0.0014826	0.917573	0.0203901	0.231773	0.0535997	0.634668
258	31697.8	0	1.033	1.0361	-30406.5	1295.13	Standard of care	0.0113213	0.404673	31697.8	0.441373	55.7496	0.0141055	0.0582724	0.139506	0.802221	0.256986	0.0437502	0.699263	0.0482072	0.0154011	0.936392	0.0121876	0.0509611	0.936851	0.367442	0.735252	0.126247	0.532444	0.0154321	0.0154873	0.441502	0.405057	0.864559	0.0836218	0.0895154	0.826384	0.0841007	0.286893	0.156789	0.447862	0.108456	0.0575389	0.00442413	0.908006	0.0300311	0.151031	0.0642705	0.707013
259	31313.6	0	2.49418	2.4948	-28195.9	3118.5	Standard of care	0.00663376	0.420382	31313.6	0.43558	59.4618	0.0245763	0.05614	0.15781	0.78605	0.22595	0.0314424	0.742607	0.0241657	0.0321736	0.943661	0.0317775	0.126364	0.841858	0.412404	0.722985	0.13061	0.46378	0.0373561	0.0373783	0.435628	0.420664	0.760186	0.126215	0.105981	0.75339	0.140629	0.283214	0.16973	0.412768	0.134288	0.0493747	0.000439974	0.922225	0.0279607	0.204407	0.0803496	0.630237
260	29918	0	1.23334	1.2362	-28376.3	1545.25	Standard of care	0.00872142	0.445422	29918	0.491351	58.5258	0.0377376	0.0843559	0.178798	0.736846	0.235518	0.0342088	0.730273	0.0139978	0.00888752	0.977115	0.0150507	0.063616	0.921333	0.37986	0.750324	0.125855	0.480615	0.0184312	0.0184832	0.491415	0.445814	0.842186	0.0942712	0.0404586	0.893916	0.0656254	0.304005	0.130263	0.494776	0.0709559	0.0699042	0.00733871	0.881486	0.0412709	0.139578	0.0836645	0.721965
261	30366.8	0	2.23131	2.23368	-27577.7	2792.1	Standard of care	0.0153864	0.430137	30366.8	0.456098	55.8982	0.0374879	0.0320963	0.189573	0.778331	0.222462	0.0238111	0.753727	0.0169648	0.0333844	0.949651	0.0280799	0.111254	0.860666	0.413842	0.730961	0.14194	0.43743	0.0333233	0.0333863	0.456172	0.43094	0.809287	0.138632	0.119795	0.772498	0.107708	0.284317	0.156121	0.383523	0.176039	0.0580296	0.000695214	0.902767	0.0385085	0.192866	0.0826363	0.646847
262	30272.2	0	2.05882	2.05086	-27698.7	2563.58	Standard of care	0.0148268	0.470931	30272.2	0.407477	57.3244	0.0422033	0.0336511	0.129924	0.836424	0.256204	0.0467503	0.697046	0.0133057	0.0179753	0.968719	0.0279164	0.0452587	0.926825	0.310837	0.761953	0.133922	0.519399	0.0308002	0.0306919	0.407661	0.471355	0.848763	0.0711817	0.0739724	0.77855	0.147478	0.244181	0.105849	0.438837	0.211133	0.0544948	0.0039203	0.917447	0.0241382	0.175625	0.048766	0.67497
263	28772.6	0	1.63565	1.63598	-26728	2044.97	Standard of care	0.0136314	0.445803	28772.6	0.449389	56.2059	0.0349084	0.033266	0.212066	0.754668	0.281415	0.0293996	0.689185	0.0537721	0.00490525	0.941323	0.0200829	0.0803395	0.899578	0.327481	0.635087	0.145492	0.436477	0.0244077	0.0244294	0.449471	0.446574	0.851231	0.116102	0.0497768	0.82763	0.122593	0.195741	0.233061	0.497084	0.0741139	0.0228113	0.0071606	0.940851	0.0291771	0.201241	0.0800313	0.656425
264	31380.9	0	2.66062	2.66175	-28055.1	3327.19	Standard of care	0.00665417	0.465902	31380.9	0.497143	61.3844	0.0129904	0.0415345	0.162473	0.795993	0.213379	0.0462425	0.740378	0.0578704	0.00883003	0.9333	0.0357025	0.0929108	0.871387	0.325022	0.552616	0.136653	0.520206	0.0398657	0.0398934	0.497212	0.466141	0.863627	0.0823259	0.13573	0.703639	0.160631	0.208581	0.19282	0.512125	0.086475	0.0404841	5.76173e-05	0.924194	0.0352645	0.140676	0.109439	0.662433
265	32940.8	0	2.52862	2.52911	-29780	3161.39	Standard of care	0.0225856	0.488995	32940.8	0.492365	61.5382	0.0247866	0.0520876	0.23721	0.710702	0.213435	0.0239157	0.762649	0.010047	0.0150023	0.974951	0.032783	0.0944038	0.872813	0.302298	0.673975	0.139187	0.474926	0.0377085	0.0377519	0.492477	0.490232	0.788175	0.158209	0.0801472	0.800753	0.1191	0.249374	0.143905	0.445344	0.161376	0.0174523	0.00930801	0.927949	0.0452904	0.178563	0.104982	0.666787
266	31931	0	3.20972	3.21216	-27918.8	4015.2	Standard of care	0.0135567	0.416931	31931	0.444557	61.8886	0.0401293	0.0312672	0.230438	0.738295	0.266446	0.0286881	0.704866	0.0634964	0.0108323	0.925671	0.0422999	0.120517	0.837183	0.341288	0.439428	0.131901	0.480742	0.0480056	0.0480667	0.444647	0.417752	0.868579	0.0955344	0.115616	0.773754	0.11063	0.299058	0.13802	0.460055	0.102867	0.0315287	0.00326651	0.922561	0.0426437	0.142981	0.0891384	0.69893
267	30988.9	0	2.71362	2.71313	-27596.8	3391.41	Standard of care	0.00678513	0.454775	30988.9	0.443165	56.5036	0.044626	0.0461115	0.160401	0.793488	0.21239	0.043143	0.744467	0.0275051	0.0142361	0.958259	0.0374534	0.0698447	0.892702	0.336193	0.679796	0.139491	0.500374	0.0406547	0.0406549	0.443235	0.45503	0.841582	0.118771	0.0899459	0.786868	0.123186	0.233466	0.179762	0.510654	0.0761182	0.0471191	0.000295728	0.927854	0.0247309	0.218448	0.0497297	0.637372
268	29518.8	0	1.3733	1.36847	-27802.1	1710.59	Standard of care	0.0118879	0.460389	29518.8	0.403606	57.0322	0.0244419	0.0734862	0.149372	0.777142	0.245127	0.0212899	0.733583	0.0208672	0.0168582	0.962275	0.0177454	0.0406772	0.941577	0.410314	0.782118	0.122596	0.479209	0.0205323	0.0204668	0.40367	0.460826	0.86809	0.0963255	0.0946501	0.73628	0.169069	0.294488	0.178289	0.380977	0.146245	0.0365918	0.000544007	0.924483	0.0383809	0.123561	0.0595032	0.719911
269	31313.5	0	1.76657	1.76838	-29105.3	2210.47	Standard of care	0.0102306	0.485626	31313.5	0.510148	55.2685	0.0559302	0.0374756	0.245832	0.716693	0.252634	0.0614185	0.685947	0.0383206	0.0255017	0.936178	0.0215121	0.101891	0.876597	0.293025	0.777499	0.119592	0.502505	0.0263761	0.0264211	0.510285	0.486193	0.856276	0.118507	0.0879295	0.808791	0.103279	0.213428	0.14891	0.495781	0.141881	0.0674244	0.00591574	0.870535	0.0561248	0.149475	0.0736594	0.683132
270	32018	0	4.50073	4.50031	-26392.1	5625.39	Standard of care	0.00790688	0.44624	32018	0.439922	60.3209	0.0201858	0.0425315	0.139137	0.818332	0.266273	0.04242	0.691307	0.0250547	0.00882017	0.966125	0.0657257	0.0357831	0.898491	0.358132	0.797028	0.133607	0.510272	0.0674809	0.0674793	0.440005	0.446498	0.848601	0.0831378	0.107276	0.77183	0.120895	0.287916	0.170504	0.424187	0.117393	0.0274583	2.89156e-08	0.894793	0.0777484	0.11105	0.0491209	0.750018
271	32324.8	0	1.4199	1.42125	-30550	1776.56	Standard of care	0.00348759	0.430583	32324.8	0.47527	62.5642	0.0185608	0.0717846	0.157716	0.770499	0.280254	0.0132102	0.706536	0.0212785	0.0315975	0.947124	0.0165112	0.107892	0.875597	0.292093	0.725569	0.137175	0.503757	0.0212698	0.0212964	0.475281	0.430717	0.808117	0.124636	0.0331172	0.869462	0.0974207	0.250094	0.18681	0.412925	0.150172	0.0412127	0.00525192	0.918989	0.0345461	0.135998	0.0572101	0.735617
272	28145.3	0	2.36824	2.37204	-25185	2965.05	Standard of care	0.0117758	0.44324	28145.3	0.490069	60.1968	0.054022	0.0278119	0.2012	0.770988	0.239045	0.0503413	0.710614	0.0314088	0.0177287	0.950863	0.0325928	0.0550971	0.91231	0.326094	0.684749	0.136312	0.494107	0.0354237	0.0354914	0.490198	0.443816	0.817685	0.121856	0.0369516	0.819697	0.143351	0.233122	0.0878582	0.534801	0.14422	0.0333406	0.0443447	0.878839	0.0434755	0.16335	0.0795158	0.691419
273	30482.8	0	2.48666	2.48212	-27374.5	3102.65	Standard of care	0.0122327	0.47226	30482.8	0.418529	61.356	0.00890218	0.0329375	0.198154	0.768908	0.25208	0.0510145	0.696905	0.0487716	0.0266293	0.924599	0.0333904	0.0732068	0.893403	0.333566	0.424241	0.143024	0.506847	0.0372049	0.0371503	0.418686	0.472801	0.814942	0.115559	0.105571	0.823924	0.0705048	0.298387	0.135729	0.466885	0.0989986	0.0153481	0.0148226	0.930023	0.0398061	0.158186	0.0397378	0.662996
274	29290.6	0	0.819898	0.824943	-28265.7	1031.18	Standard of care	0.00892192	0.431165	29290.6	0.516515	58.3862	0.0232367	0.0611102	0.227957	0.710933	0.25116	0.0769754	0.671865	0.0243672	0.0177394	0.957893	0.0059932	0.132824	0.861183	0.312617	0.780522	0.133086	0.43388	0.0121879	0.012283	0.516639	0.431733	0.851664	0.0545191	0.0768671	0.818429	0.104703	0.234147	0.154104	0.490311	0.121438	0.0357861	0.000480968	0.92005	0.0436826	0.136045	0.105983	0.681285
275	29645.8	0	2.96803	2.96486	-25935.7	3706.08	Standard of care	0.00738564	0.484662	29645.8	0.42622	59.8454	0.0143131	0.0554608	0.121253	0.823286	0.239807	0.0331821	0.727011	0.0230644	0.0104098	0.966526	0.0424142	0.0400592	0.917527	0.327506	0.704263	0.126469	0.506139	0.0444928	0.0444501	0.426282	0.484861	0.91774	0.0334588	0.0426344	0.830332	0.127034	0.220664	0.114811	0.543587	0.120938	0.0247591	0.0176304	0.881863	0.0757471	0.153132	0.0741292	0.642434
276	30240	0	3.39434	3.39759	-25997	4246.99	Standard of care	0.00698485	0.418333	30240	0.492546	56.0106	0.0246579	0.0714492	0.190505	0.738046	0.255352	0.0564435	0.688204	0.024314	0.026854	0.948832	0.046973	0.0859375	0.86709	0.321097	0.385214	0.123303	0.405912	0.0508551	0.0509135	0.492617	0.418736	0.769981	0.119473	0.0802182	0.758134	0.161647	0.285203	0.137735	0.491413	0.0856483	0.0771811	0.00157746	0.908504	0.0127376	0.116841	0.106705	0.690004
277	29705.3	0	1.01487	1.01772	-28436.7	1272.16	Standard of care	0.0151102	0.441376	29705.3	0.459988	58.1936	0.0538676	0.0363605	0.195641	0.767999	0.330984	0.0334977	0.635518	0.0377493	0.0085753	0.953675	0.00868237	0.116089	0.875229	0.372824	0.745873	0.125628	0.518949	0.0150763	0.0151474	0.460112	0.44207	0.861986	0.0776185	0.109048	0.763468	0.127484	0.294948	0.147797	0.422804	0.134451	0.081372	2.74837e-05	0.884487	0.0341137	0.144126	0.0568096	0.761409
278	31821.3	0	1.64606	1.6436	-29763.7	2054.5	Standard of care	0.00831224	0.439136	31821.3	0.400866	59.1314	0.0552358	0.0459449	0.224284	0.729772	0.24192	0.0372962	0.720784	0.0138829	0.0124774	0.97364	0.0189259	0.122371	0.858703	0.371659	0.679399	0.121289	0.509543	0.0245922	0.0245697	0.400949	0.439587	0.851432	0.0674276	0.170723	0.77423	0.0550475	0.224987	0.129666	0.494598	0.150749	0.0153225	0.000516558	0.941842	0.042319	0.125397	0.117029	0.68194
279	29893.8	0	1.8041	1.80797	-27638.6	2259.97	Standard of care	0.0145894	0.414582	29893.8	0.458097	54.8832	0.0492301	0.0295144	0.201515	0.768971	0.223641	0.0166352	0.759723	0.0282284	0.0224674	0.949304	0.0229704	0.0772723	0.899757	0.405264	0.678952	0.126978	0.470898	0.0269344	0.0270107	0.458151	0.415377	0.8089	0.130328	0.0343105	0.831513	0.134177	0.217375	0.142852	0.455685	0.184088	0.0933876	0.0488467	0.822895	0.0348704	0.189941	0.0380023	0.687242
280	30773.5	0	1.28852	1.28924	-29162.8	1611.55	Standard of care	0.00862152	0.44819	30773.5	0.459063	58.6135	0.045952	0.0268621	0.237268	0.73587	0.253524	0.0425428	0.703933	0.0143666	0.0170666	0.968567	0.0163045	0.0577509	0.925945	0.321759	0.909814	0.139818	0.48003	0.0192414	0.01926	0.459145	0.448694	0.841324	0.115771	0.0936061	0.851485	0.0549085	0.293316	0.0737715	0.516418	0.116494	0.0506662	0.000102028	0.913371	0.0358611	0.100301	0.0956963	0.717836
281	29637.6	0	1.58327	1.58893	-27658.5	1986.16	Standard of care	0.0140579	0.394783	29637.6	0.456431	59.8347	0.0527362	0.0180146	0.183021	0.798965	0.25662	0.0474528	0.695927	0.05408	0.032204	0.913716	0.0205187	0.0529034	0.926578	0.390535	0.574522	0.133496	0.482279	0.0236342	0.0237306	0.456583	0.395482	0.874091	0.068238	0.100306	0.805107	0.0945875	0.29276	0.194342	0.419864	0.0930334	0.0468385	0.0100172	0.912925	0.0302192	0.208116	0.0412889	0.676819
282	30082.4	0	1.15984	1.15998	-28632.6	1449.97	Standard of care	0.00425114	0.435983	30082.4	0.441758	55.3754	0.0462009	0.0811393	0.1151	0.803761	0.200787	0.0360957	0.763117	0.0149191	0.0139608	0.97112	0.0121991	0.116955	0.870846	0.326772	0.73189	0.124232	0.467065	0.017352	0.017362	0.441793	0.436111	0.897835	0.0707903	0.0425985	0.846387	0.111014	0.228614	0.183348	0.447406	0.140632	0.113825	0.0433582	0.808495	0.0343212	0.190461	0.0766493	0.629268
283	29429.8	0	1.87581	1.87697	-27085	2346.21	Standard of care	0.0105392	0.42455	29429.8	0.441065	58.4247	0.0226958	0.022867	0.144962	0.832171	0.204144	0.029008	0.766848	0.0152655	0.0234566	0.961278	0.0221681	0.130679	0.847153	0.35232	0.374778	0.130298	0.533292	0.0280573	0.0280972	0.441145	0.424907	0.863721	0.0863087	0.0970241	0.759592	0.143384	0.216662	0.2208	0.418557	0.143981	0.0307978	0.0162847	0.913565	0.0393523	0.197991	0.0778322	0.660593
284	30790.2	0	0.657126	0.657321	-29968.8	821.651	Standard of care	0.0117874	0.471406	30790.2	0.474405	58.5067	0.0219628	0.0601605	0.231696	0.708143	0.187902	0.0625633	0.749535	0.0193569	0.0047212	0.975922	0.00530741	0.086062	0.908631	0.401589	0.843782	0.132652	0.484081	0.00973826	0.00975767	0.474568	0.472052	0.848765	0.10975	0.103777	0.808415	0.0878081	0.179466	0.266231	0.424393	0.12991	0.0219457	0.0198708	0.931908	0.0262757	0.180131	0.0358623	0.68221
285	32804.4	0	2.09828	2.10134	-30181.5	2626.67	Standard of care	0.0140729	0.439579	32804.4	0.477215	60.7074	0.0516747	0.0509216	0.165952	0.783126	0.229652	0.0610499	0.709298	0.0484107	0.00540318	0.946186	0.0277165	0.0664724	0.905811	0.330454	0.769857	0.12962	0.470125	0.0313631	0.0314239	0.477398	0.440182	0.798914	0.128274	0.0760675	0.78301	0.140923	0.238481	0.17446	0.471378	0.115681	0.0468011	4.90207e-05	0.92826	0.0248899	0.133426	0.110762	0.663833
286	28795	0	1.40159	1.39802	-27043	1747.53	Standard of care	0.00774544	0.444264	28795	0.388899	53.578	0.0385951	0.0213668	0.181964	0.796669	0.27101	0.0443091	0.684681	0.0178728	0.0282847	0.953843	0.0179941	0.0578313	0.924175	0.332065	0.714457	0.127393	0.492794	0.0209628	0.0209157	0.388989	0.444611	0.811433	0.0786456	0.078814	0.79236	0.128826	0.199746	0.1398	0.557011	0.103442	0.0464446	0.00169997	0.925286	0.0265696	0.131843	0.0711843	0.714352
287	30025.8	0	1.59757	1.59693	-28028.8	1996.16	Standard of care	0.00789002	0.443112	30025.8	0.434072	61.3942	0.0384223	0.0461623	0.11511	0.838728	0.296677	0.0558086	0.647515	0.0339104	0.0306869	0.935403	0.0180976	0.122923	0.85898	0.348829	0.671079	0.132055	0.517322	0.0238961	0.0239017	0.434183	0.443324	0.870284	0.0816995	0.0692188	0.788783	0.141998	0.297584	0.127694	0.466411	0.108312	0.0569261	0.00414306	0.896937	0.0419944	0.201919	0.0597673	0.639292
288	31699.1	0	3.7556	3.75299	-27004.6	4691.24	Standard of care	0.0105269	0.485325	31699.1	0.450017	62.6452	0.0399291	0.0320135	0.205377	0.762609	0.221143	0.0923412	0.686516	0.013881	0.0216967	0.964422	0.0531214	0.0694186	0.87746	0.332164	0.50087	0.133233	0.499696	0.0562392	0.0562124	0.450249	0.485807	0.836481	0.124395	0.105929	0.792752	0.101319	0.245715	0.112487	0.503952	0.137846	0.0315033	0.00120358	0.924684	0.0426087	0.188927	0.063847	0.679803
289	29673	0	3.51155	3.5131	-25283.6	4391.37	Standard of care	0.0160255	0.418036	29673	0.431922	57.2424	0.0101364	0.0641566	0.121891	0.813953	0.250824	0.0694863	0.67969	0.0426809	0.0175967	0.939722	0.0483681	0.078377	0.873255	0.35267	0.631539	0.122603	0.497493	0.0525833	0.0526257	0.432198	0.418537	0.859183	0.0731051	0.0719557	0.803065	0.124979	0.306198	0.180183	0.390519	0.123101	0.0590766	0.00353232	0.876587	0.0608044	0.224253	0.0543998	0.625356
290	29269.7	0	1.68025	1.69489	-27169.4	2118.62	Standard of care	0.0171511	0.408667	29269.7	0.490682	56.1553	0.0447304	0.0426467	0.113586	0.843767	0.306736	0.0150212	0.678243	0.00411395	0.0233215	0.972565	0.0216866	0.0502472	0.928066	0.348483	0.441678	0.139284	0.518249	0.0251183	0.0253543	0.49074	0.409145	0.774756	0.180794	0.0659974	0.764636	0.169366	0.187518	0.0892465	0.566892	0.156344	0.0220361	0.0237063	0.890032	0.0642255	0.143603	0.135446	0.66314
291	30886.6	0	3.33305	3.33222	-26720.3	4165.28	Standard of care	0.00766447	0.433516	30886.6	0.408875	60.5301	0.0129976	0.0187541	0.129317	0.851929	0.152403	0.0380115	0.809585	0.0196039	0.020507	0.959889	0.0492796	0.0151549	0.935565	0.363518	0.78369	0.14197	0.49298	0.049968	0.0499574	0.408948	0.433761	0.782935	0.153021	0.0856456	0.802883	0.111471	0.186327	0.148925	0.569385	0.0953632	0.065304	0.00988315	0.864535	0.0602776	0.204258	0.0513845	0.66592
292	30043.6	0	3.93532	3.93505	-25124.5	4918.81	Standard of care	0.0159233	0.427204	30043.6	0.424427	58.4108	0.026834	0.0139625	0.295223	0.690815	0.225761	0.0125125	0.761726	0.0397381	0.0266214	0.93364	0.0535691	0.119277	0.827154	0.406538	0.545258	0.124543	0.500787	0.0588556	0.0588783	0.424477	0.42838	0.770068	0.168729	0.0987454	0.714632	0.186623	0.295964	0.130499	0.480159	0.0933779	0.0290798	0.00244321	0.92795	0.0405274	0.133137	0.0473443	0.714158
293	30898	0	1.77312	1.78082	-28681.6	2226.02	Standard of care	0.0177276	0.417671	30898	0.472928	61.0458	0.0448351	0.0277472	0.17484	0.797413	0.244764	0.0761082	0.679127	0.010154	0.00311845	0.986728	0.0226172	0.0691538	0.908229	0.366278	0.781328	0.129758	0.494183	0.0264523	0.0265868	0.473233	0.418465	0.82808	0.093681	0.064724	0.825956	0.10932	0.21043	0.0982188	0.549992	0.141359	0.0677617	4.57032e-05	0.906087	0.0261053	0.1575	0.0623324	0.654491
294	32545.2	0	2.88597	2.88734	-28937.8	3609.17	Standard of care	0.010571	0.425002	32545.2	0.438846	61.6286	0.0136077	0.0614463	0.097047	0.841507	0.303047	0.035084	0.661869	0.0134845	0.0356079	0.950908	0.0387644	0.0893391	0.871897	0.291455	0.791076	0.123472	0.486546	0.0432373	0.0432731	0.438935	0.425268	0.840043	0.0693672	0.054748	0.846141	0.0991108	0.276713	0.112818	0.482229	0.128241	0.0142729	0.00215061	0.92554	0.058036	0.159492	0.123723	0.65128
295	30750.6	0	1.00678	1.00825	-29492.1	1260.32	Standard of care	0.0119519	0.433349	30750.6	0.448925	60.5836	0.0271034	0.0430257	0.146899	0.810075	0.262669	0.0472996	0.690031	0.0429825	0.0136093	0.943408	0.0109632	0.0711181	0.917919	0.29718	0.715453	0.128526	0.535688	0.0150219	0.0150576	0.44907	0.433752	0.798718	0.105773	0.0859717	0.794646	0.119383	0.246188	0.240274	0.416946	0.0965921	0.0197452	0.00126984	0.971762	0.0072231	0.168102	0.066179	0.684996
296	32561.3	0	1.67904	1.67904	-30462.6	2098.8	Standard of care	0.00774181	0.460189	32561.3	0.460276	55.1578	0.0402666	0.0780043	0.156814	0.765182	0.159534	0.0341854	0.806281	0.0235597	0.0155224	0.960918	0.0221811	0.0598018	0.918017	0.413117	0.74629	0.131226	0.509309	0.0251327	0.0251403	0.460339	0.460469	0.812524	0.112768	0.151152	0.796424	0.0524242	0.273853	0.149983	0.459253	0.116911	0.0267245	5.44094e-05	0.945417	0.0278045	0.156245	0.0698851	0.676476
297	31554.8	0	1.80568	1.81134	-29297.7	2264.18	Standard of care	0.0140792	0.435213	31554.8	0.497241	58.2859	0.0544858	0.0210016	0.184826	0.794172	0.285441	0.0214432	0.693116	0.0855324	0.0198026	0.894665	0.0234457	0.0596359	0.916918	0.412478	0.41974	0.132854	0.48728	0.0269751	0.0270744	0.497306	0.435867	0.790956	0.119863	0.102886	0.781786	0.115328	0.283513	0.119852	0.485844	0.110791	0.0161324	0.0096354	0.948714	0.0255179	0.160301	0.0712652	0.712521
298	32003.8	0	2.32953	2.33736	-29091.9	2921.7	Standard of care	0.0159357	0.427478	32003.8	0.51019	54.9431	0.057333	0.0659092	0.127204	0.806887	0.215532	0.0457338	0.738734	0.0303109	0.0203538	0.949335	0.0307965	0.0751735	0.89403	0.316209	0.477624	0.122346	0.478328	0.0348345	0.0349728	0.51034	0.428009	0.872724	0.082333	0.108106	0.752919	0.138974	0.275734	0.162232	0.420615	0.141419	0.0364052	0.015521	0.882648	0.0654253	0.0651323	0.0716842	0.777436
299	30413.1	0	8.90917	8.91827	-19276.6	11147.8	Standard of care	0.0165474	0.420947	30413.1	0.5068	56.715	0.00855732	0.0280124	0.130149	0.841839	0.229895	0.0152061	0.754899	0.0200135	0.0135532	0.966433	0.131682	0.0707521	0.797566	0.396936	0.589614	0.127462	0.459433	0.133571	0.13373	0.50685	0.421535	0.813457	0.103201	0.0901197	0.842941	0.0669388	0.310512	0.123961	0.482072	0.0834549	0.0392908	0.000481417	0.928879	0.0313491	0.14379	0.112322	0.677685
300	32064.6	0	1.98199	1.98419	-29587.1	2480.23	Standard of care	0.00643987	0.437506	32064.6	0.498745	56.243	0.0139303	0.0750842	0.224643	0.700272	0.19013	0.0115124	0.798358	0.0243126	0.0192264	0.956461	0.0258116	0.0842093	0.889979	0.351055	0.476236	0.1347	0.507868	0.0296776	0.0297199	0.498761	0.437852	0.830438	0.10785	0.0915759	0.7983	0.110124	0.276037	0.133468	0.469115	0.12138	0.0520702	0.00189271	0.910596	0.0354411	0.14731	0.0888656	0.670573
301	29746.6	0	5.36387	5.36704	-23041.8	6708.81	Standard of care	0.00735729	0.44298	29746.6	0.49144	61.2934	0.0242922	0.0804328	0.141029	0.778539	0.297521	0.0453817	0.657097	0.0345502	0.0131662	0.952284	0.0773725	0.0661477	0.85648	0.408193	0.707168	0.131684	0.506163	0.080425	0.0804808	0.491515	0.443228	0.841169	0.0976437	0.0482868	0.832417	0.119296	0.224756	0.170285	0.475288	0.12967	0.0651961	0.00563282	0.887826	0.0413454	0.146847	0.0950703	0.65026
302	31150.4	0	1.14615	1.14496	-29717.7	1431.19	Standard of care	0.0149519	0.455861	31150.4	0.444396	55.1406	0.0200265	0.0202946	0.176026	0.803679	0.222273	0.0954907	0.682236	0.0171792	0.00787269	0.974948	0.0112277	0.119488	0.869284	0.314937	0.674828	0.120799	0.499291	0.0170553	0.0170668	0.444744	0.456492	0.796049	0.105207	0.0542746	0.814567	0.131159	0.294116	0.0927848	0.430037	0.183062	0.0894983	0.00852883	0.869025	0.0329482	0.128757	0.105524	0.701398
303	30306.7	0	2.10252	2.10327	-27678.5	2629.09	Standard of care	0.00778402	0.427684	30306.7	0.439593	62.0115	0.0425428	0.0495014	0.136936	0.813562	0.28829	0.0160345	0.695675	0.0370051	0.0252247	0.93777	0.0270997	0.0910777	0.881823	0.374038	0.433429	0.127595	0.485786	0.03148	0.0315024	0.439623	0.427958	0.825706	0.0751562	0.0866379	0.833349	0.0800126	0.209568	0.200836	0.458761	0.130836	0.085599	0.000578105	0.87098	0.0428432	0.10092	0.0837968	0.69748
304	29216.1	0	2.61804	2.61701	-25943.6	3271.26	Standard of care	0.00871122	0.436955	29216.1	0.42498	62.5335	0.0395947	0.0512918	0.120582	0.828127	0.312628	0.0141224	0.673249	0.0245586	0.00873174	0.96671	0.0359584	0.0614639	0.902578	0.366447	0.81796	0.124301	0.516725	0.0392276	0.0392205	0.425012	0.437205	0.888074	0.0675588	0.104952	0.701529	0.193518	0.26942	0.138953	0.462649	0.128977	0.0215563	0.00144611	0.889923	0.0870741	0.17892	0.0447762	0.686166
305	30839.9	0	3.10707	3.11091	-26956.1	3888.64	Standard of care	0.0145047	0.411958	30839.9	0.454822	57.6728	0.0567448	0.046863	0.106933	0.846204	0.234662	0.0409359	0.724403	0.0335216	0.0205292	0.945949	0.0434469	0.0586438	0.897909	0.349352	0.618738	0.126182	0.458353	0.0465268	0.0465981	0.454952	0.412389	0.837671	0.105194	0.0606202	0.775399	0.16398	0.250983	0.154479	0.523615	0.0709221	0.0354313	0.0198577	0.918541	0.02617	0.165879	0.0785085	0.688496
306	31977.1	0	1.93883	1.94672	-29553.6	2433.41	Standard of care	0.0145781	0.41321	31977.1	0.486181	62.4076	0.0121436	0.108995	0.16127	0.729735	0.262655	0.0182787	0.719067	0.0253776	0.0293555	0.945267	0.0231561	0.10568	0.871164	0.293347	0.890783	0.141922	0.472396	0.0289727	0.0291169	0.486236	0.413834	0.796276	0.123565	0.183309	0.669501	0.14719	0.180298	0.0990737	0.561158	0.159471	0.0631196	0.00133858	0.916571	0.0189711	0.202456	0.0657261	0.645489
307	29404.7	0	0.745436	0.750304	-28472.9	937.879	Standard of care	0.0166288	0.420745	29404.7	0.45824	57.2816	0.00572429	0.0348069	0.230103	0.73509	0.249416	0.0341328	0.716451	0.0213	0.0225963	0.956104	0.00718819	0.0601835	0.932628	0.301578	0.79188	0.13513	0.513135	0.011041	0.0111298	0.458376	0.421678	0.852372	0.0876946	0.0577238	0.82592	0.116356	0.271323	0.188321	0.397406	0.14295	0.00694688	0.0210553	0.955432	0.0165659	0.203488	0.108008	0.641788
308	31438.2	0	2.22537	2.22952	-28656.5	2786.9	Standard of care	0.0156614	0.444367	31438.2	0.48792	60.6226	0.0182105	0.0618977	0.225291	0.712811	0.216917	0.0438016	0.739281	0.0237984	0.00820377	0.967998	0.0304162	0.0463705	0.923213	0.336917	0.626474	0.12724	0.468841	0.0332489	0.0333226	0.488064	0.445276	0.774085	0.100891	0.0812902	0.778602	0.140108	0.283254	0.140752	0.46333	0.112664	0.0480407	0.0003709	0.894434	0.0571545	0.131482	0.0601528	0.725217
309	28832.5	0	2.71739	2.72182	-25435.8	3402.28	Standard of care	0.0165117	0.431886	28832.5	0.466428	55.0012	0.0358054	0.0548892	0.115967	0.829144	0.272559	0.0503099	0.677132	0.0295808	0.00984286	0.960576	0.0355643	0.0971568	0.867279	0.300845	0.56649	0.122904	0.47682	0.0406554	0.0407486	0.466614	0.432385	0.844545	0.122568	0.0395483	0.811901	0.148551	0.218185	0.146251	0.497679	0.137884	0.0591956	0.00159331	0.893033	0.0461779	0.191491	0.06839	0.670848
310	29480.9	0	2.22156	2.22574	-26703.9	2782.18	Standard of care	0.0126911	0.414905	29480.9	0.465014	59.0653	0.0268332	0.0394249	0.151595	0.80898	0.217395	0.0152239	0.767381	0.0308953	0.0029109	0.966194	0.0294371	0.0753921	0.895171	0.364939	0.589075	0.122334	0.528404	0.033249	0.0333277	0.465062	0.415371	0.839336	0.0749633	0.0659762	0.779725	0.154299	0.222703	0.215949	0.440521	0.120826	0.0347476	0.000807325	0.930076	0.0343691	0.206706	0.0712879	0.591122
311	30719.4	0	2.39711	2.40019	-27723	3000.23	Standard of care	0.0124777	0.423387	30719.4	0.487264	63.4309	0.023724	0.0651361	0.164861	0.770003	0.220114	0.0231025	0.756783	0.094917	0.0328343	0.872249	0.0320588	0.0698557	0.898086	0.328549	0.567819	0.130183	0.46645	0.0358675	0.0359281	0.487324	0.423937	0.822469	0.114787	0.0994025	0.786411	0.114186	0.259915	0.144184	0.484927	0.110973	0.0655158	0.00192239	0.873482	0.0590797	0.137497	0.085464	0.707336
312	28048.8	0	3.52636	3.52952	-23640.9	4411.9	Standard of care	0.00913343	0.45643	28048.8	0.49428	63.1416	0.0082439	0.0311822	0.1992	0.769618	0.265003	0.057749	0.677248	0.0114334	0.0249482	0.963618	0.0466678	0.141114	0.812218	0.353248	0.693002	0.122827	0.539089	0.0528178	0.0528876	0.494406	0.45683	0.862849	0.0982797	0.0511921	0.78303	0.165778	0.284837	0.161981	0.421881	0.131301	0.0715258	0.00138612	0.886305	0.0407828	0.151194	0.0406693	0.698377
313	32317.7	0	3.62964	3.63335	-27780.6	4541.68	Standard of care	0.01148	0.468896	32317.7	0.515026	60.4136	0.0423476	0.101121	0.22408	0.674799	0.230058	0.0355843	0.734358	0.0226857	0.0188582	0.958456	0.049238	0.107156	0.843605	0.346044	0.763652	0.138569	0.506505	0.0543307	0.0544073	0.515112	0.469477	0.814224	0.0961025	0.0360033	0.856419	0.107578	0.210064	0.200515	0.462061	0.12736	0.0143255	1.73926e-05	0.923017	0.06264	0.138155	0.0523013	0.740421
314	29228.4	0	0.94625	0.94934	-28045.6	1186.67	Standard of care	0.0152584	0.436168	29228.4	0.4625	59.0845	0.0117217	0.0637339	0.126773	0.809493	0.276941	0.0327323	0.690327	0.0290478	0.0097873	0.961165	0.00848165	0.100067	0.891451	0.396186	0.516845	0.130033	0.464671	0.0140954	0.0141669	0.462609	0.436676	0.890882	0.0633606	0.102681	0.785615	0.111704	0.27396	0.171017	0.459389	0.0956347	0.0463805	0.000516203	0.916397	0.0367062	0.123837	0.0410645	0.740642
315	29214.8	0	1.07156	1.07153	-27875.3	1339.41	Standard of care	0.00860589	0.434585	29214.8	0.434	61.461	0.0259155	0.035009	0.130742	0.834249	0.253636	0.031267	0.715097	0.0392578	0.0287898	0.931952	0.0131307	0.0538229	0.933046	0.39861	0.495725	0.126961	0.4641	0.0160205	0.0160272	0.434061	0.434883	0.806134	0.120009	0.07837	0.808594	0.113037	0.250568	0.124982	0.483681	0.140769	0.0637623	0.00232681	0.92726	0.00665082	0.16001	0.0746101	0.6479
316	29330.5	0	1.04913	1.04898	-28019.1	1311.22	Standard of care	0.0121571	0.434873	29330.5	0.432853	60.8996	0.0344247	0.0461987	0.217755	0.736046	0.211459	0.0372229	0.751318	0.00505292	0.0127155	0.982232	0.0113862	0.0827892	0.905825	0.378006	0.56017	0.133642	0.466162	0.0156187	0.0156316	0.432957	0.435565	0.82031	0.118772	0.0876264	0.737639	0.174735	0.31902	0.136365	0.441197	0.103418	0.0685354	0.000190146	0.889435	0.0418391	0.154192	0.0914057	0.715055
317	32674.4	0	2.41035	2.40813	-29661.5	3010.16	Standard of care	0.0166287	0.484077	32674.4	0.462026	59.1524	0.0103603	0.0328879	0.258005	0.709107	0.188894	0.0296768	0.781429	0.007611	0.00613517	0.986254	0.0303257	0.123325	0.846349	0.352565	0.626757	0.13103	0.500675	0.0359882	0.035988	0.462141	0.485038	0.795326	0.105845	0.108943	0.737034	0.154023	0.294507	0.130849	0.477326	0.0973182	0.0315343	0.00118571	0.878247	0.0890332	0.143542	0.0734899	0.736358
318	29443.3	0	2.77851	2.78144	-25970.2	3476.79	Standard of care	0.0181408	0.438824	29443.3	0.473823	62.0434	0.0395395	0.0553944	0.131276	0.81333	0.218005	0.0192679	0.762727	0.0716859	0.0293798	0.898934	0.0356632	0.116106	0.848231	0.394001	0.532306	0.124953	0.476917	0.0415455	0.0416246	0.473899	0.439436	0.805075	0.113389	0.0288653	0.843388	0.127747	0.235906	0.174166	0.491982	0.0979461	0.0569147	0.000309992	0.917736	0.0250393	0.131199	0.104923	0.687132
319	29711.1	0	2.7353	2.73383	-26292	3417.29	Standard of care	0.00871271	0.45801	29711.1	0.438115	54.0026	0.0522678	0.0516381	0.166999	0.781363	0.265657	0.0501594	0.684184	0.00783697	0.0208836	0.971279	0.0356614	0.115398	0.848941	0.404807	0.834575	0.12732	0.491204	0.0409449	0.0409389	0.43822	0.45836	0.871014	0.0538304	0.103284	0.683787	0.212929	0.277275	0.190437	0.451354	0.0809335	0.0146619	0.0115588	0.94796	0.0258191	0.149762	0.0619739	0.675877
320	29727.3	0	3.23773	3.23787	-25680.1	4047.34	Standard of care	0.0126081	0.447391	29727.3	0.448908	62.5831	0.0294497	0.0298582	0.121779	0.848363	0.255212	0.0223167	0.722471	0.0165293	0.0152338	0.968237	0.0455151	0.0618479	0.892637	0.378706	0.774957	0.130494	0.441618	0.0484988	0.0485137	0.448967	0.447803	0.815843	0.110142	0.0904532	0.770202	0.139345	0.22389	0.141083	0.515153	0.119874	0.04786	0.00660993	0.87634	0.0691896	0.205315	0.0398094	0.602293
321	31189.6	0	2.77412	2.77529	-27722	3469.11	Standard of care	0.0155206	0.444085	31189.6	0.457384	57.1336	0.0507976	0.0380512	0.104388	0.857561	0.208006	0.0303667	0.761627	0.0258494	0.0184288	0.955722	0.0388078	0.0519334	0.909259	0.382357	0.692749	0.122324	0.463374	0.0415352	0.0415662	0.457488	0.44451	0.842787	0.0615058	0.044807	0.839878	0.115315	0.250913	0.116205	0.504155	0.128727	0.0554629	0.00344448	0.91701	0.0240823	0.133784	0.0538323	0.72509
322	29699.8	0	2.51543	2.51743	-26555.5	3146.78	Standard of care	0.0073327	0.444798	29699.8	0.49578	58.9531	0.041786	0.0672492	0.174452	0.758299	0.200845	0.0138299	0.785325	0.0277899	0.019823	0.952387	0.0350577	0.0543972	0.910545	0.360676	0.806174	0.114946	0.464271	0.0376803	0.0377171	0.495801	0.445135	0.716342	0.19701	0.164892	0.740133	0.0949756	0.254261	0.114365	0.515283	0.116091	0.0787289	0.00330194	0.872399	0.0455707	0.168421	0.0809152	0.692161
323	29393.1	0	1.34893	1.34929	-27707	1686.61	Standard of care	0.013399	0.437656	29393.1	0.441913	60.1359	0.0149716	0.0537841	0.246708	0.699508	0.22631	0.0125996	0.761091	0.0339416	0.0182457	0.947813	0.0149916	0.0984634	0.886545	0.359167	0.546955	0.118003	0.49741	0.0201082	0.0201333	0.441954	0.43848	0.825734	0.0831762	0.104657	0.827675	0.0676672	0.268603	0.138456	0.490765	0.102176	0.0104197	0.00121012	0.968429	0.0199412	0.209463	0.0659084	0.626558
324	29873.5	0	3.23482	3.23376	-25830	4042.2	Standard of care	0.00517638	0.483842	29873.5	0.453388	56.8182	0.00800157	0.0319939	0.193974	0.774032	0.207146	0.0309128	0.761942	0.010979	0.0046334	0.984388	0.0458553	0.0606567	0.893488	0.35007	0.603131	0.134526	0.513479	0.0484951	0.0484844	0.453427	0.48406	0.831487	0.126409	0.0709778	0.755333	0.17369	0.244316	0.195741	0.461303	0.0986408	0.055457	0.0192387	0.859075	0.0662289	0.194733	0.0804713	0.667779
325	29055.1	0	1.50266	1.50117	-27176.8	1876.46	Standard of care	0.0129128	0.462128	29055.1	0.443975	58.3341	0.0478961	0.0568144	0.0963827	0.846803	0.228462	0.0553425	0.716195	0.0157879	0.0524454	0.931767	0.0203378	0.0297503	0.949912	0.329058	0.839105	0.136962	0.449055	0.0224731	0.0224569	0.444129	0.462446	0.787883	0.15441	0.0857861	0.766948	0.147266	0.256692	0.170836	0.440736	0.131736	0.0139831	0.0191458	0.926948	0.0399235	0.116638	0.0450553	0.764545
326	30596.2	0	2.85627	2.8568	-27025.9	3570.99	Standard of care	0.00972892	0.447171	30596.2	0.454796	58.0415	0.00700768	0.0391398	0.128553	0.832307	0.282022	0.0220837	0.695895	0.0436702	0.0207371	0.935593	0.0391977	0.073717	0.887085	0.389303	0.836338	0.12438	0.449245	0.0427943	0.042814	0.454842	0.447504	0.83876	0.107615	0.0574837	0.799288	0.143229	0.152199	0.213182	0.474529	0.16009	0.045326	0.00468015	0.901018	0.0489763	0.172007	0.0630195	0.696943
327	29239.5	0	1.56507	1.56594	-27283.2	1957.42	Standard of care	0.00868692	0.460825	29239.5	0.472223	58.3303	0.00922734	0.0714115	0.188059	0.74053	0.305785	0.0486794	0.645535	0.00932407	0.012542	0.978134	0.0188318	0.0918973	0.889271	0.335748	0.6533	0.126494	0.442339	0.0234037	0.0234297	0.47231	0.461254	0.878337	0.0952699	0.0431174	0.795454	0.161429	0.244229	0.0992125	0.564247	0.0923113	0.0602149	0.000296698	0.918639	0.0208497	0.170319	0.122116	0.630975
328	29890.5	0	2.16632	2.16875	-27182.6	2710.94	Standard of care	0.0118554	0.44773	29890.5	0.472155	59.4418	0.0502568	0.0650724	0.146726	0.788201	0.273457	0.0343555	0.692188	0.0177656	0.0223004	0.959934	0.0279504	0.0858815	0.886168	0.337187	0.67577	0.126325	0.493236	0.0324042	0.0324578	0.472248	0.448155	0.852435	0.090045	0.0731022	0.782308	0.14459	0.267667	0.15103	0.469505	0.111798	0.0411201	0.00171412	0.933677	0.0234884	0.139165	0.109468	0.668545
329	29919.8	0	1.85766	1.8695	-27597.8	2336.87	Standard of care	0.0225147	0.418037	29919.8	0.49335	58.4232	0.0298638	0.0733286	0.20094	0.725732	0.226587	0.0308995	0.742513	0.0231288	0.00731121	0.96956	0.0225793	0.0826413	0.894779	0.390845	0.718119	0.123385	0.512819	0.0276851	0.0278935	0.493509	0.419162	0.744329	0.190535	0.0681674	0.787325	0.144507	0.276702	0.0822406	0.54846	0.092597	0.0133446	0.00175988	0.955975	0.0289206	0.132299	0.0907503	0.715794
330	30169.6	0	3.14447	3.1442	-26239	3930.25	Standard of care	0.015297	0.452797	30169.6	0.449963	56.9598	0.0564523	0.0794588	0.0842049	0.836336	0.22656	0.0329971	0.740443	0.0215811	0.0200514	0.958367	0.0426935	0.0848292	0.872477	0.331467	0.466174	0.12545	0.446621	0.0470834	0.0471008	0.450072	0.453138	0.796127	0.0991474	0.0935774	0.826522	0.0799007	0.296447	0.154908	0.455185	0.0934599	0.0412511	0.0168036	0.888904	0.0530415	0.157028	0.0635997	0.679061
331	29594.4	0	1.02946	1.03226	-28307.5	1290.33	Standard of care	0.00757734	0.461234	29594.4	0.506367	53.3864	0.00911765	0.059434	0.190998	0.749568	0.250449	0.0184225	0.731128	0.0146182	0.0197957	0.965586	0.0124767	0.0556297	0.931894	0.374557	0.670731	0.13868	0.523901	0.0153909	0.0154406	0.506398	0.461553	0.858494	0.0781916	0.0715339	0.780888	0.147578	0.303017	0.178949	0.411533	0.106502	0.0478616	0.000263385	0.932795	0.0190796	0.0980802	0.0768165	0.70214
332	29591.6	0	1.97865	1.97743	-27118.3	2471.78	Standard of care	0.0112153	0.46598	29591.6	0.454738	60.1947	0.0255947	0.0269761	0.214149	0.758874	0.306022	0.0279481	0.66603	0.0219486	0.02262	0.955431	0.025305	0.0832484	0.891447	0.368808	0.814786	0.132326	0.513495	0.0295837	0.0295803	0.454814	0.466522	0.807367	0.134494	0.120632	0.754174	0.125195	0.289319	0.166656	0.464828	0.0791967	0.0980599	0.00339884	0.867066	0.031475	0.12278	0.0941937	0.752289
333	29191.6	0	1.99167	1.99804	-26702	2497.56	Standard of care	0.0148765	0.418129	29191.6	0.473592	58.8155	0.0537609	0.0649447	0.194726	0.74033	0.255413	0.0254329	0.719155	0.0176654	0.00214375	0.980191	0.0263135	0.0566229	0.917064	0.35099	0.937952	0.135025	0.485294	0.0297595	0.0298685	0.473676	0.418879	0.79676	0.105648	0.0920701	0.822967	0.0849626	0.261888	0.154805	0.374138	0.209169	0.0213903	1.22606e-05	0.930832	0.0477658	0.174153	0.180494	0.593291
334	30487.8	0	3.56761	3.57324	-26028.3	4466.55	Standard of care	0.0100226	0.422318	30487.8	0.479602	56.5814	0.0438483	0.027452	0.200246	0.772302	0.341895	0.0277707	0.630335	0.0217165	0.0301405	0.948143	0.0517083	0.0302459	0.918046	0.380663	0.492913	0.119288	0.460018	0.0534451	0.0535347	0.47966	0.422869	0.847368	0.0939882	0.0918865	0.750641	0.157472	0.269168	0.17891	0.4541	0.097823	0.0692668	0.00701553	0.888949	0.0347684	0.145639	0.050669	0.631298
335	28948	0	1.07892	1.07977	-27599.4	1349.71	Standard of care	0.00912913	0.448747	28948	0.460344	63.1678	0.0177884	0.022983	0.0916553	0.885362	0.25223	0.00588511	0.741885	0.0130648	0.00432848	0.982607	0.0125422	0.0724578	0.915	0.369058	0.606276	0.143641	0.503776	0.0161436	0.016168	0.460357	0.448943	0.763918	0.149766	0.087938	0.773168	0.138894	0.281887	0.141845	0.460181	0.116086	0.0749741	0.00114785	0.892093	0.031785	0.129462	0.0912051	0.720952
336	31771	0	1.37875	1.37845	-30047.6	1723.06	Standard of care	0.00911287	0.48217	31771	0.477511	57.5971	0.00867381	0.0435241	0.0925837	0.863892	0.249464	0.0209299	0.729606	0.0228039	0.00365052	0.973546	0.0164243	0.0871758	0.8964	0.297492	0.613759	0.119612	0.460221	0.0206388	0.0206487	0.477552	0.482378	0.762258	0.140011	0.103422	0.761934	0.134644	0.257903	0.184246	0.436763	0.121088	0.0246668	0.00033523	0.897714	0.0772843	0.174011	0.0913313	0.630581
337	32814.7	0	2.81188	2.81193	-29299.8	3514.91	Standard of care	0.00962168	0.452323	32814.7	0.452979	60.0129	0.0136331	0.0208954	0.192525	0.786579	0.263057	0.0447826	0.692161	0.0192513	0.00531121	0.975437	0.0381237	0.0870299	0.874846	0.298857	0.753108	0.126936	0.467168	0.0421036	0.0421179	0.453075	0.452795	0.798113	0.15791	0.0685377	0.801685	0.129777	0.244248	0.119786	0.527721	0.108245	0.0435047	0.00175229	0.946538	0.00820451	0.164101	0.112854	0.606238
338	28338.6	0	1.70403	1.70842	-26208.6	2135.52	Standard of care	0.0148242	0.41163	28338.6	0.455544	54.3029	0.0211159	0.0637698	0.149361	0.786869	0.243419	0.101821	0.65476	0.0277097	0.00368542	0.968605	0.0205528	0.0908093	0.888638	0.377452	0.790419	0.124032	0.457911	0.0254438	0.0255297	0.455874	0.412248	0.778959	0.129621	0.0751546	0.765958	0.158887	0.304159	0.139238	0.440708	0.115895	0.0759415	0.00547276	0.869832	0.0487539	0.113122	0.0618559	0.778649
339	30080	0	1.11099	1.11622	-28691.3	1395.27	Standard of care	0.0183313	0.437828	30080	0.479359	57.4024	0.0292921	0.0455407	0.143428	0.811031	0.204894	0.0261304	0.768975	0.0155779	0.0082241	0.976198	0.013949	0.0334281	0.952623	0.298968	0.663969	0.129907	0.541248	0.0165719	0.0166607	0.479477	0.438417	0.783124	0.130206	0.0950911	0.805705	0.0992035	0.22928	0.102638	0.498816	0.169266	0.0676205	0.0113316	0.870246	0.0508022	0.136637	0.0830541	0.681978
340	28719	0	4.34277	4.3515	-23290.6	5439.38	Standard of care	0.023585	0.416546	28719	0.464747	54.3176	0.0476983	0.0606115	0.187836	0.751553	0.262097	0.0381271	0.699775	0.0156188	0.0319915	0.95239	0.0606577	0.0820892	0.857253	0.315892	0.779805	0.12734	0.468503	0.0649487	0.0651107	0.464943	0.417745	0.883698	0.0684224	0.113591	0.778719	0.10769	0.251046	0.123376	0.570123	0.0554558	0.0564683	0.00104943	0.891272	0.0512101	0.170399	0.0893091	0.69935
341	29890.5	0	1.57175	1.57032	-27925.8	1962.9	Standard of care	0.0160868	0.413481	29890.5	0.402014	57.8306	0.0325399	0.0801697	0.121058	0.798772	0.280327	0.0106714	0.709002	0.0230718	0.0319536	0.944975	0.0202237	0.03923	0.940546	0.333641	0.521862	0.114522	0.455596	0.023497	0.0234844	0.402055	0.414032	0.780668	0.156141	0.1027	0.77758	0.11972	0.225627	0.178631	0.488223	0.107519	0.0456804	0.000692928	0.921194	0.0324329	0.1515	0.182361	0.603329
342	28004	0	2.01216	2.00802	-25488.8	2510.03	Standard of care	0.0121553	0.443651	28004	0.386009	56.672	0.0271319	0.066001	0.190314	0.743685	0.212212	0.0312923	0.756496	0.0305601	0.021306	0.948134	0.0260295	0.0765003	0.89747	0.347706	0.771361	0.120324	0.487931	0.0300892	0.0300397	0.38611	0.444231	0.883533	0.0681896	0.092455	0.803415	0.10413	0.274404	0.134656	0.451586	0.139354	0.0151825	8.49834e-05	0.925723	0.05901	0.187007	0.0405007	0.7091
343	32076.3	0	0.394791	0.393133	-31582.9	491.417	Standard of care	0.0177919	0.468195	32076.3	0.453631	56.7588	0.0112005	0.0279138	0.172069	0.800017	0.21828	0.0346809	0.747039	0.0217216	0.0426025	0.935676	0.00212024	0.0571649	0.940715	0.359221	0.786911	0.128189	0.490516	0.00579201	0.00578348	0.453775	0.468918	0.760765	0.133645	0.0775387	0.812931	0.109531	0.155777	0.16475	0.550576	0.128897	0.0783515	3.11905e-07	0.898985	0.0226633	0.154611	0.124651	0.659694
344	31088.9	0	3.33417	3.34063	-26921.2	4175.79	Standard of care	0.0134932	0.432715	31088.9	0.501238	57.8338	0.0483467	0.0525579	0.162569	0.784873	0.259777	0.0550319	0.685191	0.060952	0.00374492	0.935303	0.045622	0.0844716	0.869906	0.313358	0.587745	0.128543	0.521097	0.0499122	0.050028	0.501406	0.433234	0.869049	0.102825	0.0629218	0.873559	0.0635195	0.250841	0.126995	0.514322	0.107842	0.0525559	0.00237595	0.921389	0.023679	0.224029	0.080504	0.616376
345	31088.7	0	1.45341	1.45703	-29271.9	1821.28	Standard of care	0.00884413	0.426805	31088.7	0.478452	56.5027	0.0384193	0.0282403	0.212881	0.758879	0.284027	0.0758252	0.640148	0.0300343	0.0262275	0.943738	0.018479	0.0635654	0.917956	0.395885	0.645012	0.132094	0.463504	0.021714	0.0217769	0.478592	0.427307	0.869093	0.087206	0.109112	0.687395	0.203493	0.250518	0.119496	0.525552	0.104434	0.0483434	0.0155832	0.870099	0.0659749	0.101881	0.138574	0.613507
346	30263.7	0	5.04888	5.04667	-23952.6	6308.33	Standard of care	0.0192711	0.473839	30263.7	0.449923	57.4607	0.0113737	0.0626936	0.176824	0.760483	0.247095	0.0468783	0.706027	0.109245	0.031287	0.859468	0.0720724	0.0611219	0.866806	0.350252	0.832013	0.140768	0.52114	0.0756096	0.0755942	0.450146	0.474577	0.865888	0.0863205	0.0586303	0.835226	0.106144	0.27966	0.189608	0.486593	0.0441394	0.0419226	0.00108964	0.931184	0.0258036	0.0950514	0.0726483	0.759172
347	30230.6	0	2.22994	2.22876	-27443.2	2785.95	Standard of care	0.00665555	0.462086	30230.6	0.439827	58.5683	0.00729377	0.0438527	0.196631	0.759516	0.259392	0.0357697	0.704838	0.0394321	0.0100696	0.950498	0.0296716	0.0785968	0.891732	0.396123	0.732581	0.131036	0.538752	0.0334055	0.0333961	0.439889	0.462368	0.852901	0.0555756	0.0711599	0.846678	0.0821625	0.208828	0.192374	0.442055	0.156743	0.050606	0.0014543	0.892304	0.0556356	0.141901	0.0647341	0.677747
348	30381.7	0	0.647432	0.650813	-29572.4	813.516	Standard of care	0.008943	0.452562	30381.7	0.50106	55.655	0.0475414	0.039976	0.208627	0.751397	0.251427	0.0312365	0.717336	0.0174926	0.0172763	0.965231	0.00586293	0.0743368	0.9198	0.406792	0.547963	0.130987	0.499604	0.00962519	0.00968745	0.50112	0.453006	0.727629	0.172563	0.0727203	0.790734	0.136546	0.264739	0.125909	0.482493	0.12686	0.0451291	0.000359526	0.915797	0.0387146	0.159908	0.0530643	0.675408
349	31559.3	0	2.65384	2.65347	-28242	3316.84	Standard of care	0.0101821	0.45371	31559.3	0.448571	53.8156	0.00976815	0.0380667	0.220777	0.741156	0.267323	0.0772455	0.655432	0.0465235	0.0426355	0.910841	0.0326081	0.156689	0.810703	0.366009	0.761303	0.129152	0.487081	0.0397013	0.0397199	0.448755	0.454259	0.889586	0.0589005	0.0670124	0.785434	0.147553	0.19958	0.183935	0.487522	0.128962	0.0402139	0.00232869	0.90948	0.0479778	0.150748	0.0755508	0.706448
350	29351.4	0	2.11252	2.10929	-26710.8	2636.61	Standard of care	0.00589322	0.45538	29351.4	0.378424	61.002	0.0488084	0.0478926	0.130904	0.821203	0.289351	0.0174376	0.693211	0.0834821	0.00935528	0.907163	0.0276543	0.0824784	0.889867	0.347514	0.763635	0.127191	0.518558	0.0316466	0.0316049	0.378453	0.455557	0.889913	0.0713252	0.103424	0.783523	0.113053	0.242126	0.137182	0.450372	0.170319	0.0312185	0.000284558	0.936497	0.0320001	0.133233	0.0980593	0.686412
351	31363	0	3.23002	3.2279	-27325.5	4034.87	Standard of care	0.0195089	0.460097	31363	0.444034	62.8425	0.020109	0.0174953	0.137078	0.845426	0.259875	0.00370459	0.73642	0.0348088	0.0221565	0.943035	0.04442	0.0782029	0.877377	0.340998	0.656344	0.127322	0.454026	0.048336	0.0483288	0.44405	0.460785	0.834814	0.078643	0.0604218	0.821798	0.11778	0.264069	0.130457	0.499762	0.105712	0.0201945	0.00426366	0.949109	0.0264324	0.124396	0.106195	0.677839
352	29885.9	0	3.87699	3.87591	-25039.7	4844.88	Standard of care	0.0133951	0.462015	29885.9	0.447296	59.1276	0.00896337	0.0277875	0.201678	0.770534	0.214116	0.0419236	0.74396	0.0485045	0.00906148	0.942434	0.0533197	0.106323	0.840357	0.296314	0.343123	0.119783	0.492303	0.0580508	0.0580571	0.44743	0.462665	0.82181	0.102804	0.116039	0.763387	0.120574	0.250793	0.13657	0.520137	0.0925006	0.0410079	0.0109177	0.89862	0.0494545	0.132799	0.109515	0.706126
353	30679.9	0	1.26734	1.26512	-29095.7	1581.4	Standard of care	0.0149302	0.450072	30679.9	0.427208	60.0281	0.0354278	0.0631087	0.137716	0.799175	0.24808	0.0229525	0.728968	0.0573503	0.00971195	0.932938	0.0142353	0.0775852	0.908179	0.333215	0.594992	0.125144	0.512855	0.0189175	0.0189018	0.427296	0.450554	0.834499	0.0919834	0.0798167	0.825053	0.0951306	0.282248	0.0741446	0.487355	0.156252	0.0394713	1.90764e-05	0.933381	0.0271283	0.146596	0.0779083	0.686669
354	29311.5	0	2.52616	2.5368	-26153.8	3171	Standard of care	0.00841965	0.412659	29311.5	0.575612	57.1839	0.0386289	0.0405523	0.240838	0.71861	0.292721	0.0348724	0.672407	0.0436062	0.0200262	0.936368	0.0329451	0.106784	0.860271	0.412508	0.735348	0.131402	0.467636	0.037796	0.0379726	0.575662	0.413209	0.775337	0.195431	0.051391	0.796306	0.152303	0.29885	0.145749	0.453528	0.101873	0.0624398	0.00224402	0.859973	0.0753434	0.191759	0.0539195	0.701408
355	29396.2	0	1.67697	1.67573	-27300	2094.67	Standard of care	0.00960672	0.474556	29396.2	0.453088	61.2404	0.0529477	0.0795159	0.140808	0.779676	0.216911	0.0233189	0.75977	0.0273619	0.076533	0.896105	0.0188073	0.132921	0.848272	0.362883	0.711306	0.132723	0.484487	0.0250547	0.0250557	0.45314	0.474874	0.854898	0.103602	0.0820851	0.836687	0.0812277	0.227704	0.159141	0.501269	0.111886	0.0516097	0.00268673	0.909914	0.0357893	0.100735	0.0818225	0.695026
356	29919.6	0	3.40675	3.40767	-25661.2	4259.59	Standard of care	0.0107145	0.440488	29919.6	0.458336	59.5987	0.0160396	0.0400144	0.124957	0.835028	0.18331	0.0571131	0.759576	0.0347054	0.0321317	0.933163	0.0475986	0.0766922	0.875709	0.311179	0.516114	0.143981	0.484924	0.0510387	0.0510661	0.458473	0.440818	0.754643	0.153574	0.0775608	0.778209	0.14423	0.20858	0.212648	0.441702	0.137069	0.0230369	0.00421739	0.946181	0.0265652	0.196219	0.0559121	0.62934
357	29256.1	0	2.42672	2.42682	-26222.7	3033.53	Standard of care	0.0126772	0.449352	29256.1	0.450901	55.546	0.0126286	0.0561364	0.180479	0.763385	0.229256	0.0468501	0.723894	0.0552796	0.015466	0.929254	0.032511	0.0720233	0.895466	0.296416	0.548221	0.120895	0.467032	0.0363089	0.0363247	0.451035	0.449942	0.835737	0.1378	0.0828724	0.820966	0.0961616	0.219262	0.153319	0.513397	0.114022	0.0344556	0.000318733	0.938333	0.0268925	0.196385	0.077179	0.682857
358	30637.4	0	0.505509	0.507976	-30005.5	634.97	Standard of care	0.0101919	0.452871	30637.4	0.479748	55.9174	0.0429941	0.043745	0.171937	0.784318	0.312289	0.0290911	0.65862	0.0132928	0.00940554	0.977302	0.00402104	0.0611972	0.934782	0.406872	0.549236	0.132989	0.45112	0.00750001	0.00754757	0.479808	0.453327	0.810059	0.0829692	0.0969347	0.778468	0.124597	0.287424	0.172125	0.4494	0.0910502	0.0517164	0.00136015	0.881337	0.0655866	0.132274	0.0615562	0.743367
359	30783.6	0	0.98186	0.985057	-29556.3	1231.32	Standard of care	0.00689157	0.396234	30783.6	0.469208	64.1361	0.0574374	0.03917	0.198424	0.762406	0.245745	0.019643	0.734612	0.0411011	0.0269326	0.931966	0.0114468	0.0651395	0.923414	0.355626	0.704422	0.134721	0.468475	0.0146589	0.0147142	0.469237	0.396613	0.806304	0.0583924	0.0849471	0.770075	0.144978	0.250397	0.212303	0.417338	0.119962	0.0455894	0.00219341	0.938688	0.0135292	0.167096	0.0579822	0.655241
360	29257	0	1.73859	1.73707	-27083.7	2171.33	Standard of care	0.00629428	0.483485	29257	0.447141	55.5214	0.0370041	0.0549755	0.15027	0.794754	0.261407	0.0723361	0.666257	0.0438997	0.0169749	0.939125	0.0218707	0.0888427	0.889287	0.392339	0.516758	0.134909	0.453942	0.0260235	0.0260098	0.44724	0.483716	0.864947	0.0792685	0.103297	0.685681	0.211022	0.257136	0.158708	0.420017	0.16414	0.0533899	0.00167327	0.914868	0.0300692	0.169395	0.0659663	0.675125
361	30995.4	0	1.61574	1.61527	-28975.8	2019.09	Standard of care	0.0118039	0.418285	30995.4	0.412727	57.7656	0.0348657	0.0313939	0.173789	0.794817	0.243434	0.0376746	0.718891	0.0169713	0.033904	0.949125	0.0181071	0.127519	0.854374	0.403766	0.610012	0.136735	0.470386	0.0241236	0.0241387	0.412833	0.41883	0.825347	0.106019	0.0821195	0.791795	0.126085	0.264977	0.123278	0.492714	0.119031	0.0715824	0.00255826	0.876333	0.0495264	0.191188	0.0575719	0.664174
362	29457.6	0	1.06993	1.06777	-28120.2	1334.71	Standard of care	0.00768321	0.43408	29457.6	0.390755	57.1432	0.0174615	0.0465105	0.143165	0.810325	0.226223	0.0355358	0.738241	0.0314488	0.00740025	0.961151	0.00931888	0.146476	0.844205	0.34989	0.753207	0.139721	0.499773	0.0159873	0.0159711	0.390827	0.434348	0.875086	0.0966725	0.0629043	0.805814	0.131281	0.327617	0.129679	0.48877	0.0539337	0.0326864	0.0077711	0.922274	0.0372686	0.208254	0.106239	0.636234
363	29610.6	0	1.36421	1.37176	-27905.3	1714.7	Standard of care	0.0151233	0.415475	29610.6	0.485361	55.2684	0.0122253	0.011354	0.132536	0.85611	0.244619	0.0406789	0.714702	0.0268061	0.0476757	0.925518	0.0165683	0.0717671	0.911665	0.330693	0.453867	0.12955	0.494328	0.0203661	0.0204988	0.485497	0.41599	0.872268	0.0857871	0.0726652	0.78882	0.138515	0.301645	0.168571	0.469029	0.0607542	0.0250013	0.00947043	0.921995	0.0435335	0.151477	0.0745349	0.720943
364	27709.8	0	1.21299	1.22206	-26193.6	1527.57	Standard of care	0.0230966	0.417914	27709.8	0.457103	56.4165	0.0487619	0.0319921	0.13823	0.829778	0.316194	0.0376402	0.646166	0.0120637	0.0398123	0.948124	0.0115946	0.105729	0.882676	0.312104	0.705356	0.125782	0.496247	0.0180153	0.0181919	0.457308	0.418732	0.854875	0.0861744	0.110154	0.731662	0.158184	0.301173	0.17179	0.404966	0.12207	0.104443	0.000629249	0.876576	0.0183521	0.114135	0.149977	0.587477
365	30794.1	0	2.14032	2.14176	-28118.7	2677.2	Standard of care	0.00851926	0.424659	30794.1	0.447994	59.2233	0.0335675	0.0713226	0.13364	0.795038	0.227023	0.0231685	0.749809	0.0171372	0.0563741	0.926489	0.0287893	0.0642588	0.906952	0.377057	0.742729	0.120073	0.524436	0.0320524	0.0320829	0.448044	0.424933	0.855527	0.0511145	0.0846694	0.790711	0.124619	0.258287	0.160146	0.492062	0.0895051	0.0270577	1.04796e-05	0.956953	0.015979	0.115385	0.0767824	0.715586
366	31344.5	0	3.43953	3.44918	-27045.1	4311.48	Standard of care	0.0105185	0.408155	31344.5	0.544898	57.7973	0.0541959	0.054036	0.17806	0.767904	0.216475	0.0411465	0.742379	0.00974942	0.0123209	0.97793	0.0470562	0.100877	0.852067	0.346428	0.685179	0.122389	0.485061	0.0514966	0.0516609	0.544982	0.408656	0.821914	0.114955	0.0704646	0.810749	0.118786	0.285327	0.117146	0.468406	0.129121	0.0223424	0.00135933	0.928341	0.047957	0.200082	0.101016	0.627771
367	29827.2	0	0.631749	0.633463	-29037.5	791.829	Standard of care	0.00437586	0.431693	29827.2	0.495738	56.4563	0.0425133	0.0397286	0.131373	0.828898	0.22336	0.0193044	0.757335	0.0406264	0.00435462	0.955019	0.0060005	0.0754702	0.918529	0.328185	0.823726	0.133305	0.501245	0.00944004	0.00947162	0.495757	0.431834	0.827862	0.14696	0.0725707	0.802792	0.124637	0.243165	0.101068	0.547987	0.107779	0.0192174	0.000131595	0.927176	0.0534746	0.140262	0.0758476	0.693565
368	31623.7	0	1.49592	1.49909	-29753.8	1873.87	Standard of care	0.0139154	0.434093	31623.7	0.46336	56.7924	0.0499644	0.0377145	0.14519	0.817096	0.265438	0.055267	0.679296	0.0347783	0.0371396	0.928082	0.0184925	0.0668991	0.914608	0.358398	0.807738	0.122198	0.50515	0.0223361	0.0223989	0.463543	0.43459	0.856056	0.0904566	0.10277	0.776975	0.120255	0.265416	0.116006	0.463083	0.155494	0.0770117	0.000650593	0.908907	0.0134306	0.173861	0.0520069	0.693055
369	30520.4	0	1.50941	1.51833	-28633.6	1897.91	Standard of care	0.0136643	0.452902	30520.4	0.533644	56.3908	0.0556121	0.0192193	0.114901	0.86588	0.296532	0.0398534	0.663615	0.033048	0.0121842	0.954768	0.0182554	0.0839749	0.89777	0.346301	0.673116	0.124107	0.459156	0.0225443	0.0227001	0.533746	0.453309	0.906006	0.0520609	0.123343	0.739207	0.13745	0.23898	0.0904503	0.530761	0.139808	0.0308328	0.0010026	0.906833	0.0613319	0.234416	0.0660682	0.631733
370	31545.4	0	0.953949	0.956672	-30353	1195.84	Standard of care	0.0122585	0.440635	31545.4	0.472188	55.9005	0.0521532	0.0602116	0.149014	0.790774	0.237272	0.0547666	0.707962	0.0148633	0.0119006	0.973236	0.011594	0.0396883	0.948718	0.361192	0.505411	0.130228	0.470069	0.0142265	0.0142752	0.472333	0.441106	0.761369	0.145274	0.0920729	0.802458	0.105469	0.278483	0.146569	0.446602	0.128346	0.0182457	0.00603519	0.936501	0.0392176	0.162943	0.0848852	0.673408
371	30710.3	0	1.14587	1.14558	-29277.9	1431.97	Standard of care	0.014401	0.442688	30710.3	0.439044	62.7268	0.0439546	0.027037	0.211395	0.761568	0.222597	0.0162532	0.76115	0.0399052	0.027192	0.932903	0.0132907	0.0688442	0.917865	0.320031	0.783601	0.136301	0.455344	0.0170544	0.0170651	0.439096	0.443487	0.771931	0.120453	0.0916744	0.820555	0.0877705	0.298838	0.203952	0.433965	0.0632458	0.0336392	0.0309312	0.904576	0.0308539	0.190842	0.104869	0.610086
372	32503.3	0	0.4923	0.494867	-31887.9	618.584	Standard of care	0.00694312	0.437444	32503.3	0.489818	63.172	0.036186	0.052958	0.113484	0.833557	0.226406	0.0327774	0.740816	0.0187157	0.0231091	0.958175	0.00329603	0.0841387	0.912565	0.386636	0.748958	0.133665	0.510274	0.00733293	0.00738187	0.48987	0.437632	0.788207	0.137693	0.0762732	0.757562	0.166164	0.293628	0.0999881	0.479027	0.127357	0.069869	1.65026e-06	0.865912	0.0642169	0.159853	0.072293	0.71423
373	30871.4	0	1.71993	1.72489	-28721.5	2156.12	Standard of care	0.0118354	0.43759	30871.4	0.500221	59.9811	0.0397618	0.069917	0.137234	0.792849	0.231701	0.0314766	0.736822	0.0152426	0.0333698	0.951388	0.0223585	0.0613519	0.91629	0.408564	0.779001	0.129703	0.465762	0.025719	0.0258064	0.500297	0.438015	0.853203	0.088374	0.141702	0.761594	0.0967042	0.20228	0.180555	0.534333	0.0828323	0.0916025	0.0064361	0.850737	0.0512245	0.131068	0.0848771	0.725151
374	29409.8	0	0.972929	0.973652	-28193.7	1217.07	Standard of care	0.00741491	0.45112	29409.8	0.463338	57.2941	0.0434374	0.0663686	0.0865456	0.847086	0.252654	0.0909042	0.656442	0.00831711	0.00894454	0.982738	0.0120209	0.0456785	0.942301	0.365937	0.693996	0.139207	0.480499	0.0145518	0.0145683	0.463487	0.451278	0.723275	0.206257	0.10277	0.831007	0.0662233	0.26352	0.1527	0.459534	0.124247	0.0647757	0.00552479	0.878995	0.0507041	0.176597	0.114857	0.625349
375	30939.5	0	1.88601	1.87976	-28581.9	2349.7	Standard of care	0.0125123	0.441426	30939.5	0.397518	57.6223	0.0065475	0.0508967	0.135533	0.81357	0.367318	0.0404007	0.592282	0.0150265	0.0163582	0.968615	0.0240026	0.0689495	0.907048	0.331751	0.502497	0.129602	0.484077	0.0282197	0.0281387	0.397646	0.441852	0.81262	0.122295	0.0719011	0.80025	0.127849	0.184976	0.17118	0.463967	0.179877	0.0439852	7.02627e-05	0.927928	0.0280169	0.191865	0.0787476	0.653633
376	31667.2	0	1.54975	1.5551	-29730	1943.88	Standard of care	0.0102039	0.424581	31667.2	0.494047	57.3811	0.0199551	0.0543149	0.22724	0.718445	0.251989	0.0310149	0.716996	0.00516535	0.0102335	0.984601	0.0200333	0.0592073	0.920759	0.359632	0.683584	0.133397	0.457715	0.0231559	0.0232461	0.494111	0.425208	0.816293	0.136547	0.0674417	0.798347	0.134211	0.255799	0.139001	0.513614	0.0915853	0.0190013	0.00197345	0.933846	0.0451794	0.148221	0.0511737	0.731204
377	30911.8	0	0.586094	0.587765	-30179.2	734.706	Standard of care	0.0107998	0.462247	30911.8	0.48725	57.8036	0.0534674	0.023286	0.141284	0.83543	0.237247	0.024744	0.738009	0.0284688	0.01789	0.953641	0.0046306	0.0816222	0.913747	0.312685	0.856683	0.13564	0.445287	0.00870213	0.00874279	0.487303	0.46264	0.78372	0.12845	0.0801787	0.806469	0.113352	0.263375	0.127713	0.454768	0.154144	0.053856	0.00043388	0.898468	0.0472419	0.216571	0.0308103	0.682639
378	30146	0	1.36812	1.36844	-28435.9	1710.55	Standard of care	0.00798809	0.410511	30146	0.416791	57.5717	0.0374105	0.0326665	0.125186	0.842147	0.219766	0.042565	0.737669	0.0142217	0.026671	0.959107	0.0168354	0.076607	0.906558	0.361146	0.490108	0.129194	0.45946	0.0204651	0.0204792	0.41687	0.410789	0.809673	0.142459	0.0800165	0.795965	0.124019	0.147419	0.136499	0.601902	0.114181	0.0423332	0.0176879	0.90681	0.0331687	0.219102	0.0345466	0.584016
379	31260.1	0	2.52626	2.5287	-28102.2	3160.88	Standard of care	0.00653406	0.488823	31260.1	0.538836	55.9046	0.0235436	0.107857	0.174894	0.717249	0.264692	0.0454628	0.689845	0.0319026	0.0111298	0.956968	0.0358849	0.034251	0.929864	0.387355	0.475947	0.136218	0.478889	0.0378553	0.0378958	0.538893	0.489086	0.834015	0.0959397	0.0391033	0.832615	0.128282	0.228776	0.160632	0.470899	0.139693	0.0352998	0.011846	0.93021	0.0226445	0.135443	0.0643523	0.679472
380	29251.3	0	1.37809	1.38107	-27528.7	1726.33	Standard of care	0.020628	0.473717	29251.3	0.493832	60.7739	0.0153479	0.0364041	0.128893	0.834703	0.233789	0.021543	0.744668	0.0177565	0.0413432	0.9409	0.0156149	0.0875493	0.896836	0.329062	0.405546	0.126333	0.503511	0.0205394	0.0206168	0.493931	0.474324	0.763022	0.149798	0.119893	0.778683	0.101424	0.257361	0.141681	0.496197	0.10476	0.0364478	0.00492458	0.93087	0.0277577	0.127225	0.0499078	0.754615
381	29774.1	0	8.01842	8.01018	-19751.1	10012.7	Standard of care	0.016916	0.456939	29774.1	0.401259	57.33	0.0106726	0.0461041	0.211163	0.742733	0.266089	0.0661521	0.667759	0.0176271	0.0242997	0.958073	0.116467	0.09345	0.790083	0.337373	0.445218	0.139912	0.525213	0.120152	0.120052	0.401562	0.457731	0.781576	0.130596	0.105222	0.805675	0.0891037	0.18695	0.156712	0.513698	0.14264	0.0446741	6.46127e-05	0.890243	0.0650179	0.17752	0.0652288	0.662786
382	28688.8	0	3.93494	3.9375	-23770.2	4921.87	Standard of care	0.00487302	0.396361	28688.8	0.478102	59.4606	0.0411313	0.0471506	0.156261	0.796589	0.237452	0.0596469	0.702901	0.0221489	0.0401494	0.937702	0.0536296	0.126789	0.819581	0.329357	0.776832	0.119021	0.447564	0.0589742	0.0590228	0.478161	0.396584	0.795583	0.107761	0.0856804	0.805267	0.109052	0.356069	0.129374	0.386782	0.127775	0.0295978	0.00972529	0.882481	0.078196	0.229902	0.0576716	0.577114
383	30967.2	0	1.63909	1.63694	-28918.3	2046.17	Standard of care	0.0132593	0.45002	30967.2	0.429463	56.3427	0.0182313	0.0217309	0.221459	0.75681	0.267254	0.0550348	0.677711	0.0358349	0.0223742	0.941791	0.0200047	0.084554	0.895441	0.292963	0.594239	0.142943	0.51056	0.0244665	0.0244512	0.429645	0.450698	0.874456	0.0649446	0.135809	0.761424	0.102767	0.265473	0.128339	0.463786	0.142402	0.0651734	0.0103658	0.893177	0.0312842	0.158494	0.0844412	0.677552
384	31260	0	3.60619	3.60398	-26752.3	4504.98	Standard of care	0.0125169	0.473401	31260	0.451695	59.071	0.0403908	0.0305662	0.17595	0.793483	0.287433	0.0637254	0.648841	0.0301186	0.0141706	0.955711	0.0493115	0.100045	0.850643	0.323672	0.824156	0.128347	0.471048	0.0539844	0.0539718	0.451875	0.473936	0.844659	0.0922736	0.0680486	0.737285	0.194666	0.204044	0.183954	0.54496	0.0670423	0.0413489	0.00673026	0.927853	0.0240678	0.1403	0.0992953	0.602706
385	29516.5	0	1.22719	1.22516	-27982.5	1531.46	Standard of care	0.0078098	0.47778	29516.5	0.455139	60.4392	0.00809713	0.0309358	0.152828	0.816236	0.378169	0.0327652	0.589066	0.0492547	0.010965	0.93978	0.0141349	0.080455	0.90541	0.348148	0.792146	0.129346	0.523278	0.0183595	0.0183395	0.455202	0.478039	0.781381	0.13907	0.084197	0.763281	0.152522	0.254876	0.151985	0.477681	0.115457	0.0505481	6.68531e-05	0.921535	0.0278501	0.230545	0.0823759	0.632527
386	31521.9	0	0.956055	0.960982	-30326.8	1201.23	Standard of care	0.0222509	0.410948	31521.9	0.439227	63.2606	0.0470271	0.00965453	0.160068	0.830277	0.258786	0.0108581	0.730356	0.0275528	0.0217873	0.95066	0.0105017	0.0500982	0.9394	0.389332	0.682014	0.135435	0.510721	0.0141988	0.0142909	0.439286	0.411835	0.837378	0.115779	0.0739423	0.779777	0.146281	0.246797	0.14507	0.490515	0.117617	0.0371897	0.00220698	0.916659	0.0439442	0.147515	0.118068	0.683692
387	30401.4	0	1.42939	1.43899	-28614.7	1798.73	Standard of care	0.0174869	0.440385	30401.4	0.514881	60.7838	0.0303134	0.0462794	0.164113	0.789607	0.251732	0.0448821	0.703386	0.034524	0.0308528	0.934623	0.0171309	0.0696967	0.913172	0.330674	0.629771	0.145269	0.507948	0.0213082	0.0214737	0.515046	0.441061	0.801023	0.132318	0.0390934	0.748027	0.21288	0.307735	0.146933	0.424407	0.120925	0.0314162	0.00238056	0.926377	0.0398262	0.131177	0.084735	0.734439
388	30781.1	0	1.1827	1.18751	-29302.7	1484.39	Standard of care	0.0104336	0.44663	30781.1	0.511629	59.2157	0.0280711	0.0413757	0.14804	0.810585	0.298137	0.0405215	0.661341	0.0717037	0.0098049	0.918491	0.0142107	0.0610052	0.924784	0.340556	0.780919	0.116606	0.467233	0.0176701	0.0177532	0.511714	0.447032	0.803842	0.0990438	0.0660397	0.794892	0.139068	0.201805	0.119064	0.559923	0.119208	0.0299222	0.0037656	0.915929	0.0503836	0.176257	0.077708	0.657921
389	28738.3	0	0.626176	0.628345	-27955.5	785.431	Standard of care	0.0147544	0.449094	28738.3	0.466045	58.9017	0.0534579	0.028124	0.13051	0.841366	0.284487	0.0246346	0.690879	0.0218556	0.0166569	0.961487	0.00402001	0.0963732	0.899607	0.38532	0.731381	0.143493	0.496302	0.0092801	0.00933706	0.466128	0.449552	0.860121	0.0802643	0.12768	0.741341	0.130979	0.206467	0.123604	0.580578	0.0893518	0.0527385	0.0411584	0.865031	0.0410722	0.124913	0.0898664	0.648292
390	28604.4	0	2.69859	2.69912	-25231.2	3373.89	Standard of care	0.00680533	0.432998	28604.4	0.449084	61.4173	0.00892597	0.0728058	0.18817	0.739024	0.262935	0.0496982	0.687367	0.11152	0.0321631	0.856317	0.0375105	0.055856	0.906633	0.380872	0.7945	0.129332	0.477634	0.0404326	0.0404461	0.449162	0.433329	0.84168	0.11694	0.0421105	0.816828	0.141061	0.215893	0.153397	0.48475	0.14596	0.0315742	0.00217237	0.931849	0.0344047	0.184541	0.132769	0.625079
391	29528.3	0	1.54148	1.54077	-27601.4	1925.96	Standard of care	0.0100421	0.46062	29528.3	0.447312	60.9469	0.0494113	0.0201411	0.127029	0.85283	0.244725	0.0601709	0.695104	0.0776421	0.0174946	0.904863	0.0198315	0.0615045	0.918664	0.317526	0.400102	0.130729	0.468948	0.0230522	0.0230517	0.447448	0.460938	0.84871	0.073709	0.130079	0.806703	0.0632182	0.251485	0.156403	0.472626	0.119486	0.0804774	0.000767934	0.860683	0.0580716	0.145571	0.0257645	0.714444
392	29999.9	0	4.5272	4.53606	-24340.9	5670.07	Standard of care	0.0114661	0.407904	29999.9	0.500426	58.4974	0.0486451	0.0398214	0.203941	0.756238	0.275459	0.0519924	0.672549	0.0119562	0.00257536	0.985468	0.0635198	0.0979329	0.838547	0.29302	0.646472	0.121833	0.472047	0.0678023	0.0679537	0.500549	0.408546	0.89317	0.0764683	0.0787404	0.809456	0.111803	0.329628	0.139936	0.438192	0.0922428	0.0466874	0.000197334	0.895521	0.057594	0.231827	0.0765448	0.622793
393	29604.9	0	1.77954	1.77903	-27380.5	2223.78	Standard of care	0.0060541	0.457427	29604.9	0.4428	56.8433	0.0148123	0.0242447	0.158214	0.817541	0.222782	0.0243579	0.75286	0.0277434	0.0167896	0.955467	0.0255088	0.0208583	0.953633	0.347134	0.49255	0.134406	0.4491	0.0266617	0.0266559	0.442832	0.457675	0.792182	0.124329	0.139953	0.716391	0.143656	0.272871	0.134196	0.440565	0.152368	0.0316099	0.0025633	0.893591	0.0722358	0.142786	0.0594012	0.731857
394	29434.8	0	2.29821	2.29582	-26562.1	2869.78	Standard of care	0.0111925	0.481025	29434.8	0.45697	56.4979	0.0454264	0.0663854	0.125451	0.808164	0.310289	0.0230272	0.666684	0.0208211	0.00722144	0.971957	0.031412	0.0498931	0.918695	0.350542	0.525753	0.135149	0.458206	0.0344125	0.0343861	0.457026	0.481367	0.804533	0.0887601	0.0576835	0.745675	0.196642	0.206811	0.189516	0.493953	0.10972	0.051233	0.0048785	0.901408	0.042481	0.12424	0.0467786	0.781138
395	29792.1	0	1.6964	1.69621	-27671.6	2120.26	Standard of care	0.00979986	0.426378	29792.1	0.421964	61.8171	0.0431107	0.0669745	0.154179	0.778847	0.161562	0.0478973	0.790541	0.0269717	0.00678121	0.966247	0.0227928	0.0483725	0.928835	0.388402	0.610596	0.133026	0.474671	0.0253793	0.0253837	0.422076	0.426773	0.806633	0.111059	0.0678495	0.811511	0.120639	0.254756	0.130337	0.481911	0.132997	0.0732901	0.00366572	0.887978	0.0350664	0.160624	0.038657	0.700387
396	30438.9	0	1.30732	1.3084	-28804.8	1635.5	Standard of care	0.0088997	0.451144	30438.9	0.474926	57.7781	0.0505245	0.0557021	0.176527	0.767771	0.188826	0.0403322	0.770842	0.0302818	0.0252174	0.944501	0.0161191	0.0688406	0.91504	0.309921	0.929468	0.12853	0.483138	0.0195326	0.0195589	0.475005	0.451533	0.838731	0.104153	0.0478992	0.851025	0.101076	0.270861	0.192091	0.344287	0.192761	0.0422436	2.65729e-05	0.918506	0.039224	0.13717	0.0989174	0.686289
397	30042.1	0	1.18288	1.18928	-28563.5	1486.6	Standard of care	0.00792019	0.401332	30042.1	0.487358	56.8196	0.0147058	0.0784368	0.116044	0.805519	0.295774	0.0510046	0.653221	0.038868	0.00444219	0.95669	0.0149077	0.0464861	0.938606	0.364923	0.701039	0.116966	0.543323	0.0177063	0.0178078	0.487458	0.401554	0.773305	0.144064	0.0992613	0.80039	0.100348	0.244447	0.161534	0.489647	0.104372	0.0163246	0.00143772	0.94929	0.0329474	0.148863	0.186011	0.567347
398	28623.8	0	1.11884	1.12206	-27225.3	1402.57	Standard of care	0.0125519	0.437011	28623.8	0.476095	61.2893	0.0238462	0.0854245	0.168976	0.7456	0.254123	0.0444643	0.701412	0.0534241	0.0147348	0.931841	0.0113858	0.0961372	0.892477	0.364056	0.560002	0.126391	0.487867	0.0166806	0.0167481	0.476219	0.437545	0.778678	0.153819	0.0949732	0.76815	0.136877	0.244392	0.189611	0.451252	0.114746	0.0369693	0.000112886	0.913003	0.0499145	0.145102	0.0553119	0.706007
399	29847	0	2.54417	2.54664	-26666.8	3183.29	Standard of care	0.0122142	0.420295	29847	0.44746	55.0307	0.0221771	0.0411049	0.157916	0.800979	0.239401	0.017842	0.742757	0.0195471	0.0196378	0.960815	0.0332791	0.100142	0.866579	0.31601	0.825066	0.131114	0.510134	0.03808	0.0381369	0.447513	0.420771	0.788714	0.103437	0.0454369	0.808154	0.146409	0.275829	0.114204	0.507673	0.102293	0.0360351	0.0068243	0.916275	0.0408653	0.159097	0.129042	0.64589
400	30679.3	0	1.17641	1.17651	-29208.7	1470.64	Standard of care	0.0118135	0.456369	30679.3	0.457402	58.2617	0.010372	0.0373165	0.236857	0.725826	0.298749	0.0506848	0.650567	0.0243854	0.00836315	0.967251	0.0150546	0.0368273	0.948118	0.294029	0.515624	0.127775	0.44491	0.0175399	0.0175481	0.457529	0.457105	0.855998	0.0794518	0.0855264	0.820742	0.0937311	0.216319	0.171021	0.445724	0.166936	0.0419479	0.000536684	0.922056	0.035459	0.108039	0.0534761	0.746805
401	31476.2	0	1.33364	1.3439	-29809.1	1679.88	Standard of care	0.0194389	0.424482	31476.2	0.497381	56.5576	0.0327157	0.0475785	0.124044	0.828378	0.246472	0.034444	0.719084	0.0251276	0.015561	0.959311	0.0153136	0.0763261	0.90836	0.317334	0.796254	0.117845	0.489804	0.0198856	0.0200658	0.497526	0.425107	0.790068	0.136669	0.0738191	0.784642	0.141539	0.249822	0.183922	0.471921	0.094334	0.0491747	0.00425339	0.901003	0.0455689	0.143614	0.0936615	0.681295
402	31950.9	0	1.22782	1.22667	-30416.1	1533.34	Standard of care	0.0107059	0.453193	31950.9	0.441255	62.3472	0.0561867	0.02388	0.156804	0.819316	0.297631	0.0165368	0.685832	0.0135848	0.0127209	0.973694	0.0148831	0.063642	0.921475	0.412756	0.652128	0.13271	0.478146	0.0183375	0.0183312	0.441296	0.453608	0.805891	0.104365	0.118718	0.734803	0.146479	0.265284	0.132386	0.480427	0.121903	0.0422602	0.0165924	0.901551	0.0395961	0.143026	0.0925336	0.719735
403	30951.9	0	1.02818	1.03344	-29666.7	1291.8	Standard of care	0.0127862	0.447144	30951.9	0.491018	56.3204	0.00710748	0.036856	0.128541	0.834603	0.300707	0.0531549	0.646138	0.0293351	0.0397961	0.930869	0.0118336	0.0571106	0.931056	0.347262	0.742336	0.119433	0.518225	0.0153472	0.0154389	0.491176	0.44753	0.809433	0.132577	0.10859	0.779334	0.112076	0.315897	0.154322	0.376329	0.153452	0.0593395	0.000497049	0.852337	0.0878267	0.135937	0.0560586	0.738729
404	30525.2	0	1.47003	1.47726	-28687.6	1846.58	Standard of care	0.0151128	0.417776	30525.2	0.519262	56.2184	0.0149207	0.040763	0.128183	0.831054	0.182134	0.0284226	0.789444	0.0337947	0.023245	0.94296	0.0191307	0.050198	0.930671	0.304079	0.864201	0.139844	0.476463	0.021967	0.0220894	0.519347	0.418284	0.808658	0.135263	0.0812757	0.804521	0.114204	0.21787	0.200852	0.365123	0.216155	0.0454566	0.000613854	0.937765	0.0161643	0.113014	0.119599	0.68579
405	29409.2	0	2.05129	2.05183	-26845	2564.78	Standard of care	0.0134346	0.465221	29409.2	0.46936	58.6011	0.013509	0.105317	0.201093	0.69359	0.318439	0.0341965	0.647365	0.0453589	0.0250742	0.929567	0.0265113	0.0612627	0.912226	0.318997	0.612402	0.129956	0.529111	0.0306718	0.0306928	0.469472	0.465813	0.811729	0.107821	0.0872904	0.820405	0.0923047	0.19685	0.149087	0.553997	0.100067	0.0455264	5.37969e-05	0.949284	0.00513574	0.0802144	0.0862658	0.743498
406	28133.5	0	2.09984	2.10301	-25508.7	2628.77	Standard of care	0.0103366	0.456868	28133.5	0.493078	57.0827	0.03193	0.070151	0.139855	0.789994	0.288458	0.036664	0.674878	0.01761	0.0311755	0.951214	0.0274069	0.0775685	0.895025	0.348597	0.622736	0.12987	0.470257	0.0314254	0.031487	0.493157	0.45723	0.861652	0.0564572	0.0655555	0.832503	0.101941	0.231821	0.117949	0.516212	0.134018	0.0618249	0.00559698	0.901676	0.0309026	0.162918	0.0476612	0.73531
407	30200.6	0	1.80933	1.81478	-27939	2268.48	Standard of care	0.00632272	0.429962	30200.6	0.527493	61.0046	0.0178436	0.0321917	0.182141	0.785667	0.274434	0.0240503	0.701516	0.0157465	0.013237	0.971016	0.0247267	0.0484974	0.926776	0.295813	0.732847	0.119971	0.512575	0.0271	0.0271875	0.527525	0.430243	0.807162	0.0954961	0.0761217	0.805334	0.118544	0.29525	0.164956	0.4212	0.118594	0.0882448	0.00852744	0.882028	0.0211998	0.126974	0.0541472	0.738662
408	31049.3	0	1.26425	1.26207	-29469	1577.58	Standard of care	0.0120076	0.435674	31049.3	0.401964	57.21	0.0361705	0.0376771	0.207796	0.754527	0.175831	0.022089	0.80208	0.0123381	0.081104	0.906558	0.0154305	0.0665464	0.918023	0.404602	0.579035	0.126517	0.507383	0.0188577	0.0188352	0.402034	0.436279	0.890912	0.0690589	0.0958511	0.738615	0.165534	0.253834	0.131686	0.45871	0.155771	0.0589018	0.000230329	0.861407	0.0794611	0.151592	0.121666	0.640571
409	29979	0	1.4941	1.49006	-28111.4	1862.58	Standard of care	0.0142438	0.475665	29979	0.432378	57.6236	0.050397	0.0935231	0.176075	0.730402	0.225019	0.0491276	0.725854	0.0380404	0.0531058	0.908854	0.0151368	0.138298	0.846566	0.366478	0.780576	0.122795	0.52851	0.0222653	0.0222335	0.432562	0.476209	0.82492	0.125044	0.0482755	0.819086	0.132639	0.214458	0.208277	0.387727	0.189538	0.0198287	0.00706882	0.933681	0.039421	0.190307	0.121688	0.602482
410	27993	0	1.84264	1.84118	-25689.7	2301.47	Standard of care	0.00995696	0.45954	27993	0.437443	60.5461	0.0257228	0.0211531	0.176183	0.802664	0.240132	0.0238913	0.735977	0.0268464	0.0287746	0.944379	0.0243148	0.0659164	0.909769	0.386355	0.485729	0.138004	0.470334	0.0275652	0.0275534	0.437497	0.459973	0.829262	0.0580748	0.061866	0.81279	0.125344	0.278751	0.127442	0.518085	0.0757222	0.0677602	1.27457e-05	0.856567	0.0756599	0.170666	0.0581367	0.737705
411	30098.1	0	2.02678	2.02206	-27564.6	2527.58	Standard of care	0.010363	0.448057	30098.1	0.382577	59.843	0.0171524	0.0284585	0.164655	0.806886	0.284539	0.0123336	0.703127	0.0494378	0.0172268	0.933335	0.0263228	0.0788177	0.894859	0.390386	0.711428	0.134394	0.445527	0.0303313	0.0302716	0.382608	0.448509	0.84347	0.0792112	0.0559192	0.854107	0.0899737	0.198486	0.149898	0.504598	0.147018	0.0988347	0.00505612	0.878631	0.0174782	0.184304	0.0941167	0.658951
412	29833.3	0	3.97756	3.97634	-24861.4	4970.42	Standard of care	0.0096486	0.44837	29833.3	0.430386	61.4312	0.0298311	0.0279231	0.123691	0.848386	0.278846	0.0240058	0.697148	0.0463261	0.01485	0.938824	0.0557181	0.0856895	0.858592	0.38941	0.480213	0.141812	0.453654	0.059609	0.0596037	0.430437	0.448679	0.817159	0.087306	0.0889477	0.798183	0.112869	0.31013	0.125977	0.449677	0.114217	0.0308595	0.0103516	0.882274	0.0765152	0.162481	0.0888338	0.702649
413	30934.5	0	1.63031	1.62924	-28896.6	2036.55	Standard of care	0.00572906	0.442296	30934.5	0.414122	56.4816	0.0098286	0.0750369	0.139673	0.78529	0.26656	0.038852	0.694588	0.0552546	0.00877727	0.935968	0.0204357	0.0829648	0.8966	0.398348	0.735367	0.133904	0.46834	0.0244209	0.0244118	0.414175	0.442502	0.683921	0.16589	0.138373	0.754333	0.107294	0.216818	0.161722	0.479936	0.141524	0.0515968	0.00112327	0.928661	0.0186194	0.180124	0.089936	0.646093
414	29118.3	0	2.14571	2.14334	-26436.2	2679.17	Standard of care	0.0101197	0.436286	29118.3	0.411029	59.9733	0.0115279	0.049433	0.18708	0.763487	0.311475	0.037017	0.651508	0.0369043	0.0263971	0.936699	0.0262354	0.119281	0.854484	0.332927	0.623983	0.125903	0.508114	0.0321046	0.0320864	0.411127	0.436745	0.78368	0.151206	0.060354	0.804712	0.134934	0.30348	0.169678	0.411547	0.115295	0.0888683	0.00574852	0.84301	0.0623731	0.183691	0.0436591	0.73667
415	31820.5	0	1.4083	1.40548	-30060.1	1756.85	Standard of care	0.0104001	0.465954	31820.5	0.431123	58.4893	0.00678725	0.0443514	0.23627	0.719379	0.246594	0.0468828	0.706523	0.0162726	0.00274482	0.980983	0.0171288	0.0754805	0.907391	0.321528	0.709275	0.13396	0.503329	0.0210339	0.0210038	0.431244	0.466518	0.86298	0.0658142	0.0889356	0.797734	0.11333	0.187006	0.228206	0.474952	0.109836	0.032273	0.00395984	0.914471	0.0492964	0.0968974	0.0670826	0.752126
416	30543.3	0	2.44207	2.43637	-27490.7	3045.46	Standard of care	0.0247619	0.4708	30543.3	0.440796	62.1716	0.0306658	0.0725901	0.147938	0.779472	0.262327	0.0318933	0.705779	0.0102018	0.0185271	0.971271	0.0318502	0.0669481	0.901202	0.361012	0.656761	0.136202	0.456877	0.0364662	0.0364069	0.44097	0.47171	0.826303	0.0926749	0.132565	0.690784	0.17665	0.262117	0.189873	0.440442	0.107568	0.0288149	0.00319164	0.881272	0.0867216	0.185086	0.0652718	0.63398
417	29958.7	0	3.15044	3.15148	-26020.6	3939.35	Standard of care	0.00958206	0.444034	29958.7	0.455661	56.9376	0.0563075	0.0244781	0.155131	0.820391	0.302076	0.0454166	0.652508	0.00771937	0.0323777	0.959903	0.0431225	0.0877277	0.86915	0.304067	0.538729	0.120094	0.473946	0.0471764	0.0472058	0.45576	0.444417	0.826987	0.0554259	0.0666404	0.787375	0.145985	0.292381	0.161924	0.3713	0.174395	0.0635533	0.0120363	0.907744	0.0166667	0.116168	0.0575909	0.696786
418	29970.2	0	3.87232	3.87053	-25129.8	4838.16	Standard of care	0.0161966	0.437675	29970.2	0.423384	58.1611	0.0291756	0.0276794	0.0982828	0.874038	0.263382	0.0375122	0.699105	0.0307029	0.0151387	0.954158	0.0528194	0.110112	0.837069	0.33001	0.796069	0.132569	0.496461	0.0579956	0.0579973	0.423535	0.438066	0.801493	0.106571	0.127652	0.791471	0.0808771	0.268395	0.178128	0.432345	0.121131	0.0259361	0.00433108	0.940944	0.0287886	0.207246	0.0492331	0.668753
419	30269.5	0	1.51036	1.49514	-28381.6	1868.93	Standard of care	0.0174317	0.479929	30269.5	0.368663	54.2651	0.0390225	0.0367773	0.219324	0.743899	0.262941	0.0492353	0.687823	0.0299503	0.0293932	0.940657	0.0189573	0.0492105	0.931832	0.30596	0.604063	0.125069	0.503529	0.0225091	0.0222929	0.368901	0.480792	0.785222	0.158398	0.119546	0.762573	0.117881	0.215188	0.199029	0.451724	0.134059	0.0437452	0.00185168	0.918042	0.0363614	0.0914215	0.0886981	0.762131
420	31542	0	1.04462	1.04415	-30236.3	1305.19	Standard of care	0.0170638	0.468603	31542	0.464635	59.0265	0.0177022	0.0354018	0.148463	0.816135	0.230408	0.0342453	0.735347	0.020898	0.0187186	0.960383	0.0119284	0.0588381	0.929233	0.326925	0.720725	0.134053	0.502048	0.0155621	0.015572	0.464771	0.469184	0.804362	0.0935209	0.081158	0.79344	0.125402	0.271099	0.131636	0.471371	0.125893	0.0485367	0.00112729	0.917304	0.0330318	0.182914	0.0572798	0.677687
421	30182.5	0	2.72731	2.7315	-26773.4	3414.37	Standard of care	0.0180356	0.444494	30182.5	0.471772	53.1347	0.0191604	0.0274654	0.219109	0.753425	0.312452	0.0352433	0.652305	0.0423101	0.0294635	0.928226	0.0369547	0.0645097	0.898536	0.314344	0.360808	0.135451	0.473598	0.0407573	0.0408389	0.471909	0.445493	0.792423	0.150795	0.0853662	0.776372	0.138262	0.202134	0.140376	0.504009	0.15348	0.042085	0.001711	0.929892	0.0263125	0.122412	0.121472	0.711658
422	29380.7	0	2.39459	2.39801	-26387.4	2997.51	Standard of care	0.0113993	0.437788	29380.7	0.49003	55.0744	0.0135955	0.0486525	0.207216	0.744131	0.200479	0.101616	0.697905	0.0362721	0.0027067	0.961021	0.031346	0.0946236	0.87403	0.356644	0.747818	0.140193	0.507739	0.0358164	0.0358844	0.490288	0.43835	0.769626	0.151145	0.0729002	0.850538	0.0765614	0.240006	0.146462	0.521199	0.0923326	0.0313846	0.000480088	0.875014	0.0931218	0.168499	0.0256395	0.739746
423	31876.8	0	3.05326	3.05622	-28060.2	3820.28	Standard of care	0.0151022	0.417447	31876.8	0.442057	58.684	0.0347947	0.0677544	0.106693	0.825552	0.266732	0.0124992	0.720769	0.0253747	0.00716961	0.967456	0.0414138	0.0791161	0.87947	0.396211	0.61912	0.13932	0.497201	0.0457255	0.0457894	0.442102	0.417853	0.805467	0.125722	0.0872445	0.792781	0.119974	0.229417	0.172208	0.518581	0.0797943	0.0665772	0.00204884	0.904421	0.0269533	0.125294	0.0810108	0.721355
424	29915.9	0	4.41493	4.41347	-24397.2	5516.84	Standard of care	0.00632808	0.434387	29915.9	0.370581	59.9009	0.0121254	0.0387662	0.133151	0.828082	0.152755	0.0443304	0.802915	0.0376869	0.0283476	0.933965	0.0639684	0.0532587	0.882773	0.371893	0.783672	0.124927	0.466991	0.0661996	0.0661824	0.370653	0.434609	0.812038	0.0761045	0.0993547	0.795173	0.105472	0.286231	0.143598	0.385026	0.185146	0.0454915	0.003333	0.920557	0.0306184	0.147291	0.0765902	0.70582
425	29108.9	0	2.47429	2.48217	-26016	3102.71	Standard of care	0.020086	0.411835	29108.9	0.466646	56.0094	0.035587	0.0348172	0.0902293	0.874953	0.245603	0.00344321	0.750954	0.0177038	0.0247823	0.957514	0.0324909	0.0857685	0.881741	0.36254	0.605808	0.120221	0.475435	0.0370169	0.0371659	0.466661	0.412327	0.828879	0.129377	0.0859927	0.742727	0.17128	0.287674	0.136541	0.414471	0.161314	0.0469317	5.76536e-05	0.919556	0.0334543	0.14137	0.0749486	0.716839
426	31112	0	2.2296	2.23976	-28325	2799.7	Standard of care	0.011155	0.43507	31112	0.52761	60.7645	0.0108632	0.0456041	0.141911	0.812485	0.37802	0.0287215	0.593258	0.0508424	0.014078	0.93508	0.0306909	0.0422053	0.927104	0.388059	0.459738	0.121101	0.450832	0.0333833	0.0335442	0.52767	0.435502	0.846519	0.123822	0.110253	0.780249	0.109497	0.259685	0.12187	0.493185	0.12526	0.033459	0.00500777	0.904436	0.057097	0.146943	0.081678	0.705809
427	30464.3	0	0.863162	0.866397	-29385.4	1083	Standard of care	0.0093448	0.481282	30464.3	0.525921	56.9024	0.042313	0.0294577	0.121463	0.849079	0.248353	0.0213076	0.73034	0.0177808	0.0092742	0.972945	0.00910753	0.0766438	0.914249	0.395303	0.723719	0.118259	0.504684	0.0128852	0.0129477	0.525963	0.481539	0.841556	0.130061	0.070417	0.796668	0.132915	0.266641	0.112159	0.479283	0.141917	0.0363355	5.34757e-05	0.932773	0.0308383	0.177807	0.112022	0.654412
428	29511.3	0	3.87447	3.88098	-24668.2	4851.23	Standard of care	0.0135296	0.427587	29511.3	0.480541	62.9856	0.0290586	0.0528083	0.194443	0.752749	0.284729	0.013034	0.702237	0.00508125	0.0426733	0.952245	0.0550792	0.0568787	0.888042	0.291294	0.613798	0.137896	0.491924	0.0580186	0.0581298	0.48058	0.428247	0.811509	0.102175	0.0661015	0.859306	0.0745925	0.223917	0.201493	0.478904	0.095686	0.0553661	0.0261135	0.873163	0.045357	0.171236	0.0619361	0.716791
429	31368.2	0	0.889952	0.895471	-30255.8	1119.34	Standard of care	0.0126594	0.437848	31368.2	0.519779	57.9243	0.019361	0.0770707	0.133325	0.789604	0.202736	0.0710999	0.726164	0.0175107	0.0284906	0.953999	0.0101818	0.0508903	0.938928	0.315725	0.596233	0.128155	0.42579	0.0132632	0.0133567	0.51994	0.438323	0.84971	0.0934657	0.101747	0.819399	0.0788542	0.215286	0.135982	0.525097	0.123635	0.0342191	0.0192647	0.912506	0.0340097	0.0706257	0.0614253	0.77711
430	32475.5	0	2.22755	2.22738	-29691.1	2784.23	Standard of care	0.0147523	0.426394	32475.5	0.424725	58.9395	0.02248	0.080713	0.143824	0.775463	0.237992	0.00743325	0.754575	0.0219609	0.0334746	0.944565	0.0294525	0.065108	0.90544	0.329164	0.743026	0.126158	0.481002	0.0333274	0.0333392	0.424751	0.426946	0.790899	0.142496	0.0681282	0.792818	0.139053	0.234085	0.137978	0.525676	0.102262	0.0372977	0.000201912	0.877973	0.0845277	0.24999	0.110008	0.559049
431	29498.9	0	3.19164	3.20204	-25509.4	4002.54	Standard of care	0.0131796	0.431509	29498.9	0.524025	58.6336	0.0318794	0.0577463	0.236208	0.706046	0.313835	0.0442107	0.641954	0.0358883	0.0322227	0.931889	0.0427313	0.101513	0.855755	0.403101	0.605839	0.131411	0.460781	0.047735	0.0479138	0.524136	0.432338	0.852724	0.0923485	0.0909149	0.720673	0.188412	0.232408	0.185717	0.501497	0.0803786	0.0655908	1.32856e-05	0.914655	0.0197405	0.113223	0.0947632	0.734919
432	31383.2	0	1.62709	1.62664	-29349.3	2033.31	Standard of care	0.00939837	0.425155	31383.2	0.419701	58.0603	0.0255063	0.0701073	0.151701	0.778191	0.297179	0.0317778	0.671043	0.0174322	0.0341863	0.948381	0.0185484	0.118026	0.863426	0.378739	0.567257	0.128323	0.464107	0.0243289	0.0243386	0.419772	0.425538	0.843511	0.118612	0.07674	0.729958	0.193302	0.259046	0.163675	0.489743	0.0875357	0.0237052	0.00531083	0.949106	0.021878	0.217092	0.0732307	0.638109
433	30304.4	0	3.3364	3.33704	-26133.9	4171.3	Standard of care	0.00867009	0.448592	30304.4	0.461428	57.3428	0.0136613	0.114801	0.142824	0.742375	0.216432	0.0137477	0.76982	0.0388967	0.0065355	0.954568	0.0432706	0.147378	0.809351	0.385832	0.567042	0.120858	0.490625	0.0499894	0.0500195	0.461456	0.448898	0.827581	0.0824028	0.0933239	0.805845	0.100831	0.305655	0.099203	0.38815	0.206992	0.0466351	0.000490119	0.91005	0.0428244	0.148311	0.0855721	0.674111
434	29360.6	0	1.27699	1.28384	-27764.3	1604.8	Standard of care	0.0134323	0.470982	29360.6	0.566516	59.9588	0.0529388	0.0661168	0.149396	0.784487	0.231631	0.0147532	0.753616	0.0626946	0.0241579	0.913147	0.0162488	0.0417602	0.941991	0.319343	0.704848	0.126506	0.476422	0.0190684	0.0191825	0.566552	0.471467	0.809617	0.088072	0.0515622	0.807198	0.14124	0.282655	0.154663	0.468745	0.093937	0.0451458	0.0297819	0.859803	0.0652694	0.195604	0.0555056	0.694664
435	32333.6	0	1.67734	1.67868	-30236.9	2098.35	Standard of care	0.0061763	0.442604	32333.6	0.473719	57.5785	0.0308172	0.0748404	0.122645	0.802515	0.237196	0.0393307	0.723473	0.0270021	0.0422992	0.930699	0.0190239	0.135589	0.845387	0.354905	0.60801	0.12618	0.501234	0.0251042	0.0251384	0.473775	0.442788	0.800311	0.134716	0.0919043	0.849892	0.0582033	0.197778	0.0956464	0.491418	0.215158	0.051347	0.00282287	0.919758	0.0260726	0.253222	0.106336	0.558522
436	31289.9	0	1.54811	1.54723	-29354.8	1934.04	Standard of care	0.0133915	0.451727	31289.9	0.442901	61.8411	0.0254376	0.0355165	0.134479	0.830004	0.266544	0.0655818	0.667874	0.0437424	0.0414891	0.914768	0.0186395	0.0827077	0.898653	0.305921	0.536936	0.139142	0.499978	0.0231234	0.0231278	0.443112	0.452152	0.819087	0.116842	0.0792568	0.784411	0.136332	0.217028	0.171706	0.51001	0.101256	0.0515945	0.000133035	0.905553	0.0427191	0.171959	0.0627786	0.661294
437	28738.4	0	3.47067	3.46657	-24400	4333.22	Standard of care	0.00837855	0.464075	28738.4	0.394912	56.4198	0.0173163	0.036693	0.138099	0.825208	0.25325	0.0177576	0.728993	0.0384962	0.0173047	0.944199	0.048172	0.0831007	0.868727	0.316839	0.761486	0.125792	0.495412	0.0520181	0.0519666	0.394951	0.464348	0.793846	0.0900232	0.0838547	0.811919	0.104226	0.280224	0.178087	0.423764	0.117926	0.048713	3.21585e-05	0.892649	0.0586054	0.182819	0.041485	0.689098
438	30562.8	0	2.98125	2.98461	-26836.3	3730.77	Standard of care	0.00761361	0.442775	30562.8	0.504511	60.373	0.0556029	0.0791713	0.11923	0.801599	0.268522	0.0458611	0.685617	0.0340907	0.00629092	0.959618	0.0406708	0.0845341	0.874795	0.339132	0.600809	0.139174	0.454318	0.0446624	0.0447239	0.504579	0.443012	0.82744	0.120185	0.0680087	0.825715	0.106277	0.234381	0.145491	0.478632	0.141496	0.0705415	0.000337486	0.899183	0.0299382	0.144615	0.093158	0.676237
439	30552.3	0	1.91254	1.91521	-28161.7	2394.01	Standard of care	0.00867607	0.437689	30552.3	0.476648	58.359	0.0216679	0.0245	0.163517	0.811983	0.264004	0.0121373	0.723859	0.00891549	0.0388679	0.952217	0.024922	0.0789785	0.896099	0.39294	0.743269	0.143905	0.4689	0.0286245	0.0286765	0.47667	0.438052	0.733237	0.236014	0.0940657	0.812643	0.0932913	0.231398	0.137984	0.527811	0.102808	0.0275967	0.00297297	0.922068	0.0473629	0.176903	0.0954372	0.634437
440	31766.3	0	2.44269	2.44472	-28712.9	3055.9	Standard of care	0.0203185	0.460537	31766.3	0.472624	55.3315	0.0207191	0.0297945	0.19891	0.771296	0.281741	0.0202093	0.69805	0.0150429	0.00765451	0.977303	0.0316189	0.0910922	0.877289	0.408466	0.580066	0.137891	0.465543	0.0364741	0.0365355	0.472711	0.461542	0.840809	0.0961676	0.0882486	0.831863	0.0798885	0.238952	0.128784	0.521145	0.111118	0.0566211	0.0126303	0.909858	0.020891	0.114524	0.121505	0.667813
441	31203.6	0	2.5239	2.52952	-28048.7	3161.9	Standard of care	0.0059571	0.399622	31203.6	0.524371	58.2138	0.0127262	0.0325319	0.121999	0.845469	0.266779	0.0088974	0.724324	0.0397491	0.0203697	0.939881	0.0351463	0.0576734	0.90718	0.326754	0.720664	0.134105	0.50287	0.0378338	0.037925	0.524382	0.39981	0.803899	0.120012	0.178671	0.724708	0.0966206	0.277119	0.1149	0.473252	0.13473	0.0495542	0.00848703	0.91171	0.0302483	0.101622	0.0684014	0.726584
442	30006.3	0	0.912952	0.913879	-28865.1	1142.35	Standard of care	0.00758681	0.450501	30006.3	0.472967	56.8259	0.00640449	0.079359	0.120647	0.799994	0.184315	0.0258501	0.789835	0.0172993	0.0174551	0.965246	0.00879027	0.103483	0.887727	0.348869	0.558015	0.127289	0.488866	0.0136489	0.0136762	0.473011	0.450726	0.812655	0.085684	0.0607211	0.793896	0.145383	0.205645	0.193744	0.359471	0.24114	0.0301538	0.000274013	0.914144	0.0554278	0.175987	0.0766707	0.672565
443	31404.5	0	2.40826	2.41549	-28394.2	3019.36	Standard of care	0.00937628	0.396929	31404.5	0.513987	63.884	0.0391867	0.0508838	0.114097	0.83502	0.224393	0.0322291	0.743378	0.00968721	0.00804143	0.982271	0.0329391	0.0659012	0.90116	0.361595	0.528377	0.142856	0.458169	0.0360689	0.0361884	0.514045	0.397229	0.737456	0.184971	0.120004	0.756199	0.123797	0.216476	0.114423	0.526519	0.142582	0.0659152	0.0141807	0.890502	0.0294017	0.160035	0.0409072	0.688537
444	31802.1	0	3.93871	3.94351	-26878.7	4929.39	Standard of care	0.00800314	0.42803	31802.1	0.497798	59.3064	0.0537102	0.0649483	0.133908	0.801144	0.262561	0.0485947	0.688845	0.00630757	0.0386545	0.955038	0.0550059	0.0894156	0.855578	0.343767	0.670539	0.126084	0.504035	0.0590194	0.0591041	0.497884	0.428295	0.804604	0.125395	0.089626	0.793604	0.11677	0.337668	0.126604	0.402831	0.132897	0.0382385	0.000961567	0.94232	0.0184798	0.147257	0.0675471	0.694999
445	33240.3	0	2.27634	2.27866	-30394.9	2848.32	Standard of care	0.0129954	0.443633	33240.3	0.474874	58.6118	0.0114573	0.0456021	0.245485	0.708913	0.195501	0.0243633	0.780135	0.013102	0.0117364	0.975162	0.0295811	0.0942759	0.876143	0.303795	0.686765	0.140304	0.469261	0.0340203	0.0340748	0.474941	0.444443	0.823158	0.122989	0.0753816	0.836812	0.0878068	0.291276	0.150288	0.469824	0.0886114	0.0474656	0.0038841	0.874278	0.0743718	0.179574	0.0507757	0.718129
446	30990.9	0	1.90854	1.90873	-28605.2	2385.92	Standard of care	0.0156366	0.4764	30990.9	0.478809	55.8632	0.0180328	0.0241377	0.154071	0.821791	0.195219	0.0238972	0.780884	0.0247026	0.0129306	0.962367	0.0257779	0.0526099	0.921612	0.393574	0.759578	0.126556	0.453546	0.0285314	0.0285486	0.478887	0.477002	0.830311	0.111361	0.0728973	0.782648	0.144454	0.205304	0.189315	0.492359	0.113022	0.070258	0.00515036	0.877726	0.0468654	0.176442	0.0964205	0.648241
447	29785.2	0	1.75913	1.76162	-27586.3	2202.03	Standard of care	0.0144748	0.446221	29785.2	0.470131	58.0789	0.00987754	0.0284669	0.185573	0.78596	0.247822	0.0672877	0.68489	0.040508	0.0267724	0.93272	0.0204014	0.118619	0.86098	0.374246	0.693499	0.128683	0.518045	0.0262613	0.0263268	0.470364	0.446846	0.911853	0.0528973	0.0405641	0.835217	0.124219	0.279037	0.181475	0.432309	0.107179	0.0260345	9.14256e-05	0.936178	0.0376962	0.192949	0.0731174	0.683839
448	30723.2	0	2.20203	2.21324	-27970.7	2766.55	Standard of care	0.013923	0.431662	30723.2	0.516349	58.9368	0.0381868	0.0222177	0.237507	0.740275	0.317794	0.0299615	0.652245	0.010493	0.0231294	0.966378	0.0299931	0.0521595	0.917847	0.37997	0.733545	0.13527	0.464766	0.0329003	0.0330814	0.516431	0.432532	0.801496	0.112044	0.104612	0.800871	0.0945172	0.275053	0.147555	0.472491	0.104901	0.0432084	0.00616908	0.916404	0.0342186	0.232805	0.0699135	0.624144
449	28978	0	2.63957	2.63824	-25678.6	3297.8	Standard of care	0.0119536	0.466589	28978	0.450424	57.6243	0.0107651	0.0701305	0.164976	0.764893	0.288286	0.0427106	0.669003	0.0537138	0.0138337	0.932453	0.0366137	0.046817	0.916569	0.409725	0.752849	0.141888	0.438184	0.0395166	0.0395055	0.45053	0.467096	0.849684	0.119542	0.0772694	0.796851	0.12588	0.248121	0.180509	0.460924	0.110446	0.0728823	0.0016581	0.883415	0.042045	0.101534	0.0435295	0.748417
450	27742.1	0	1.11791	1.12575	-26344.7	1407.19	Standard of care	0.0157748	0.389885	27742.1	0.45987	59.3774	0.0412669	0.0284247	0.15352	0.818056	0.271989	0.0675291	0.660482	0.0475136	0.0236549	0.928831	0.0121808	0.0776772	0.910142	0.307176	0.632398	0.122476	0.470474	0.0166415	0.0167779	0.460107	0.390572	0.830655	0.11687	0.0575078	0.83014	0.112352	0.247314	0.134637	0.486071	0.131977	0.03012	0.0224545	0.933966	0.013459	0.184261	0.107	0.627531
451	30546.8	0	4.85845	4.85794	-24473.7	6072.43	Standard of care	0.0196142	0.465498	30546.8	0.462402	58.5058	0.0533014	0.0521456	0.19308	0.754774	0.262739	0.0344142	0.702846	0.0153606	0.00769703	0.976942	0.0705469	0.0397158	0.889737	0.344685	0.490946	0.11842	0.499684	0.0727481	0.0727533	0.462562	0.46639	0.741381	0.142777	0.0876171	0.827942	0.0844412	0.315741	0.134835	0.464894	0.0845302	0.0318374	0.000604356	0.93544	0.0321186	0.117234	0.0715531	0.709969
452	31579.5	0	1.0923	1.09657	-30214.2	1370.72	Standard of care	0.0181832	0.462525	31579.5	0.491176	60.5391	0.0396531	0.0445316	0.164124	0.791344	0.259923	0.0532713	0.686806	0.0102473	0.0171716	0.972581	0.0108906	0.096004	0.893105	0.303917	0.452931	0.132775	0.489914	0.0162302	0.0163246	0.491386	0.463235	0.906909	0.0524421	0.109686	0.786516	0.103798	0.260722	0.165877	0.46824	0.105161	0.0703985	0.00822018	0.905777	0.0156045	0.195741	0.0478592	0.663006
453	30490.3	0	1.57676	1.57582	-28519.4	1969.77	Standard of care	0.0129138	0.457339	30490.3	0.44776	55.6895	0.0185374	0.0169754	0.132819	0.850206	0.261124	0.0294391	0.709437	0.028791	0.00903429	0.962175	0.0192766	0.0842353	0.896488	0.399067	0.525803	0.126683	0.493696	0.0235737	0.0235777	0.44785	0.457751	0.801167	0.115184	0.0974143	0.80734	0.0952461	0.279385	0.142045	0.410076	0.168494	0.0363041	0.000721464	0.924308	0.0386664	0.0932132	0.146335	0.670209
454	30346.8	0	2.89909	2.89991	-26723	3624.89	Standard of care	0.0193725	0.493396	30346.8	0.500394	61.3169	0.0345238	0.0329218	0.127363	0.839716	0.26299	0.0353591	0.701651	0.0535645	0.00618837	0.940247	0.0388917	0.0870244	0.874084	0.352873	0.540621	0.130979	0.431865	0.0433584	0.0434012	0.500522	0.494013	0.786139	0.14193	0.0414753	0.759903	0.198622	0.226979	0.134606	0.498225	0.14019	0.042481	0.00756054	0.916224	0.0337349	0.136343	0.101811	0.687073
455	31259.1	0	1.51345	1.51758	-29367.3	1896.98	Standard of care	0.0199497	0.452907	31259.1	0.481232	60.8085	0.0291859	0.0636753	0.1701	0.766225	0.270465	0.0312715	0.698263	0.0385691	0.0101107	0.95132	0.0167048	0.098648	0.884647	0.407026	0.7079	0.120734	0.472108	0.0225429	0.0226377	0.481367	0.453769	0.825233	0.118429	0.0949601	0.774	0.13104	0.301065	0.142955	0.435317	0.120664	0.0200038	2.13641e-06	0.955868	0.0241266	0.232829	0.0507495	0.631606
456	30791.5	0	3.14479	3.14975	-26860.5	3937.18	Standard of care	0.0163405	0.393181	30791.5	0.424894	59.7952	0.0196906	0.0507273	0.147472	0.801801	0.325051	0.0587375	0.616211	0.033152	0.0129491	0.953899	0.0439573	0.0443994	0.911643	0.334592	0.552901	0.128387	0.48747	0.047076	0.0471608	0.425128	0.393834	0.755286	0.157531	0.0607064	0.762838	0.176456	0.265657	0.133757	0.433338	0.167247	0.0430134	0.000542577	0.873376	0.0830677	0.129323	0.0995938	0.679362
457	30250.1	0	1.30271	1.30469	-28621.7	1630.86	Standard of care	0.0133431	0.432694	30250.1	0.450773	56.505	0.032137	0.0731871	0.229584	0.697229	0.29444	0.0157065	0.689854	0.0202564	0.0456161	0.934128	0.0149373	0.0761316	0.908931	0.412703	0.657275	0.131674	0.452532	0.0194099	0.0194548	0.450818	0.43352	0.830899	0.129352	0.0835234	0.778639	0.137838	0.351376	0.108816	0.458531	0.0812767	0.0518038	0.00612228	0.88722	0.0548534	0.161469	0.0627532	0.644022
458	29306.8	0	1.5445	1.54392	-27376.2	1929.9	Standard of care	0.0117941	0.455926	29306.8	0.450398	61.5	0.0506421	0.043486	0.172824	0.78369	0.306711	0.0743573	0.618932	0.0166267	0.0138172	0.969556	0.0203112	0.0434381	0.936251	0.295429	0.632007	0.129065	0.456278	0.0230733	0.0230729	0.45059	0.456451	0.8194	0.146913	0.117276	0.743004	0.13972	0.248211	0.182609	0.396583	0.172597	0.122766	0.00433523	0.805406	0.0674928	0.127837	0.0508084	0.786942
459	30891.1	0	0.951586	0.952757	-29701.6	1190.95	Standard of care	0.0102255	0.462815	30891.1	0.492816	63.439	0.016173	0.0318422	0.156722	0.811436	0.171527	0.0200764	0.808397	0.0588614	0.00682947	0.934309	0.0102998	0.0796299	0.91007	0.291953	0.637107	0.123579	0.506256	0.0142053	0.0142371	0.492863	0.463187	0.752257	0.135227	0.0472668	0.810855	0.141878	0.244566	0.170495	0.434266	0.150673	0.0694154	0.00443786	0.903004	0.0231429	0.139641	0.116124	0.653265
460	28512.3	0	1.87992	1.88347	-26162.4	2354.34	Standard of care	0.0101158	0.448898	28512.3	0.496903	53.8057	0.043322	0.0684972	0.134769	0.796734	0.247266	0.0166939	0.73604	0.0141501	0.0112076	0.974642	0.0240102	0.0826012	0.893389	0.396414	0.660728	0.117328	0.471097	0.0281295	0.0281977	0.496938	0.449249	0.838057	0.0965269	0.076677	0.848986	0.0743374	0.290957	0.0978504	0.45175	0.159443	0.0640917	2.13344e-06	0.888585	0.0473208	0.158774	0.086827	0.662236
461	30192.8	0	1.36938	1.36955	-28481.1	1711.93	Standard of care	0.00751121	0.439947	30192.8	0.444773	53.644	0.056767	0.0456852	0.140044	0.81427	0.172555	0.0291041	0.798341	0.0325714	0.0192754	0.948153	0.0155309	0.109445	0.875024	0.330443	0.794773	0.129406	0.493819	0.020469	0.0204847	0.444825	0.440206	0.860576	0.0908123	0.0910169	0.735752	0.173231	0.258928	0.210333	0.44206	0.0886794	0.0803958	0.00276496	0.883484	0.0333555	0.124389	0.0771414	0.733998
462	30336.8	0	1.34772	1.34409	-28652.1	1680.11	Standard of care	0.00848086	0.427122	30336.8	0.356494	61.9233	0.0144924	0.064591	0.194098	0.741311	0.249249	0.0592052	0.691546	0.0630797	0.0180951	0.918825	0.0141207	0.12489	0.860989	0.389878	0.820265	0.126001	0.485317	0.0201381	0.020097	0.356631	0.427547	0.766305	0.117947	0.050926	0.830705	0.118369	0.23145	0.166969	0.516997	0.084584	0.019905	0.0242107	0.925008	0.0308765	0.169773	0.0498179	0.704472
463	30000.8	0	2.86754	2.8637	-26416.4	3579.63	Standard of care	0.00892386	0.474109	30000.8	0.404563	55.1381	0.031942	0.0337476	0.153204	0.813048	0.195918	0.0268004	0.777281	0.0143957	0.0126162	0.972988	0.0405202	0.0513686	0.908111	0.413658	0.613575	0.141634	0.510228	0.0429644	0.0429139	0.404625	0.474411	0.762612	0.170941	0.0843399	0.834809	0.0808514	0.311319	0.134965	0.454545	0.0991705	0.038479	0.00119451	0.899263	0.0610634	0.135776	0.0689862	0.733048
464	29032.3	0	2.70021	2.70129	-25657	3376.61	Standard of care	0.0156855	0.456155	29032.3	0.465633	55.6328	0.0424903	0.0254799	0.15786	0.81666	0.247271	0.0393552	0.713373	0.0214398	0.0198376	0.958723	0.0379414	0.0436148	0.918444	0.302592	0.442468	0.125002	0.480567	0.0404046	0.0404323	0.465772	0.456767	0.831025	0.0687986	0.0778264	0.783154	0.13902	0.19055	0.192848	0.472964	0.143638	0.0574796	0.00530782	0.885369	0.0518437	0.180319	0.0739444	0.640812
465	29816.2	0	1.63556	1.63513	-27771.8	2043.92	Standard of care	0.00590277	0.459287	29816.2	0.451096	59.9497	0.0159806	0.0470295	0.155353	0.797617	0.320263	0.0603666	0.619371	0.0260951	0.0126727	0.961232	0.0224084	0.0384322	0.939159	0.362034	0.630636	0.126039	0.445611	0.0244967	0.024494	0.451172	0.459528	0.760884	0.14898	0.0705813	0.734069	0.19535	0.194469	0.12468	0.568286	0.112566	0.0444398	0.00331901	0.924854	0.0273867	0.154207	0.0681581	0.691862
466	29527.5	0	1.25862	1.25067	-27954.3	1563.33	Standard of care	0.0223633	0.495319	29527.5	0.43691	55.4379	0.0271761	0.0925603	0.183428	0.724012	0.186999	0.0766957	0.736305	0.0162047	0.0317745	0.952021	0.0128178	0.0948491	0.892333	0.361831	0.654683	0.129896	0.528294	0.0186867	0.0186014	0.437354	0.496168	0.815253	0.11158	0.0723472	0.860867	0.0667857	0.203196	0.151022	0.456633	0.18915	0.0649549	0.00271413	0.908088	0.0242434	0.107164	0.0888905	0.692172
467	30783.9	0	0.761402	0.761842	-29832.1	952.302	Standard of care	0.00778915	0.432577	30783.9	0.443583	63.1554	0.0498597	0.0458759	0.143836	0.810288	0.261335	0.0449966	0.693668	0.105709	0.0244736	0.869817	0.00865336	0.0455033	0.945843	0.372389	0.608928	0.13335	0.491979	0.0113655	0.0113774	0.443666	0.432856	0.806627	0.110535	0.0788679	0.837247	0.0838851	0.256156	0.179966	0.464238	0.0996396	0.0558831	2.38738e-05	0.909097	0.034996	0.170946	0.0764521	0.625332
468	28252.8	0	3.89495	3.89969	-23384.1	4874.61	Standard of care	0.0138761	0.476608	28252.8	0.52253	57.5657	0.0159776	0.0536818	0.159607	0.786711	0.2824	0.0453079	0.672292	0.0242318	0.0243212	0.951447	0.0535954	0.102231	0.844173	0.344038	0.792288	0.121904	0.431284	0.0583191	0.0584159	0.522643	0.477186	0.864934	0.0971149	0.0454255	0.784824	0.169751	0.258775	0.167552	0.480255	0.093418	0.102609	0.0172754	0.842535	0.0375816	0.127457	0.0847745	0.675805
469	30489.1	0	2.3352	2.3332	-27570.1	2916.5	Standard of care	0.00551842	0.447392	30489.1	0.405483	57.96	0.0569979	0.0812549	0.157371	0.761374	0.28253	0.0435378	0.673932	0.0244002	0.0134707	0.962129	0.0312667	0.0775313	0.891202	0.390508	0.868628	0.121951	0.500017	0.0349805	0.0349568	0.405545	0.447602	0.816064	0.112004	0.142104	0.75132	0.106576	0.217521	0.0886328	0.581166	0.11268	0.0312728	0.00574503	0.9334	0.0295818	0.159958	0.0576675	0.728537
470	29647.9	0	2.69559	2.70275	-26278.5	3378.44	Standard of care	0.015575	0.462119	29647.9	0.521759	59.0993	0.0299184	0.118202	0.189913	0.691885	0.28495	0.0484749	0.666575	0.0472057	0.00990255	0.942892	0.0355358	0.077731	0.886733	0.38659	0.842396	0.137695	0.482897	0.0403078	0.0404352	0.521909	0.462829	0.843435	0.0979513	0.0858999	0.804676	0.109425	0.178657	0.208106	0.464535	0.148701	0.0646285	5.57826e-05	0.891827	0.043489	0.148982	0.0632545	0.707448
471	29346	0	0.776446	0.781171	-28375.4	976.463	Standard of care	0.0131924	0.450622	29346	0.504325	62.336	0.0110004	0.019221	0.101674	0.879105	0.23862	0.0404199	0.72096	0.0265749	0.0197448	0.95368	0.00902896	0.0422452	0.948726	0.312883	0.835087	0.12061	0.469794	0.0115832	0.0116642	0.504434	0.450966	0.742249	0.106625	0.0507034	0.764541	0.184755	0.209691	0.109417	0.561367	0.119524	0.0449797	0.00518879	0.91575	0.0340813	0.122043	0.0713476	0.741423
472	30184.6	0	6.01697	6.0203	-22663.4	7525.38	Standard of care	0.00985529	0.440341	30184.6	0.477482	54.8667	0.0287424	0.0669927	0.158024	0.774983	0.299352	0.00465947	0.695988	0.0328388	0.0233309	0.94383	0.0881596	0.042386	0.869454	0.391817	0.512241	0.128489	0.515213	0.0902163	0.0902735	0.477492	0.44071	0.81535	0.132401	0.0667186	0.83034	0.102942	0.219639	0.104525	0.485796	0.190039	0.0542198	0.00478173	0.905764	0.0352342	0.178978	0.10628	0.62884
473	29817.7	0	2.02163	2.02222	-27290.6	2527.77	Standard of care	0.00926056	0.453191	29817.7	0.464484	59.5677	0.00869545	0.0448155	0.148467	0.806717	0.194395	0.0454954	0.76011	0.03411	0.0294639	0.936426	0.0267562	0.0730194	0.900224	0.406602	0.601505	0.124006	0.520921	0.0302678	0.0302878	0.464586	0.453507	0.861356	0.0950029	0.0785261	0.796131	0.125343	0.215972	0.127876	0.519052	0.1371	0.0293243	3.90359e-05	0.906406	0.0642309	0.119583	0.0767789	0.729974
474	32490.7	0	3.59857	3.59909	-27992.5	4498.86	Standard of care	0.00429224	0.400551	32490.7	0.422781	60.0975	0.0425911	0.0384595	0.157001	0.80454	0.182268	0.0625272	0.755204	0.0159901	0.0100331	0.973977	0.0504762	0.0823319	0.867192	0.341447	0.753305	0.115218	0.479659	0.0539456	0.0539587	0.422847	0.400737	0.820862	0.0873999	0.110078	0.747528	0.142394	0.314556	0.140424	0.403502	0.141519	0.0326459	0.00642154	0.9198	0.0411322	0.122694	0.101952	0.685139
475	29697.3	0	1.51773	1.52162	-27800.2	1902.03	Standard of care	0.0129935	0.42439	29697.3	0.459571	63.1406	0.014405	0.0316632	0.170489	0.797848	0.272953	0.0675171	0.65953	0.0131327	0.0318205	0.955047	0.0194175	0.0568113	0.923771	0.312918	0.671293	0.125579	0.4879	0.0226677	0.0227377	0.459773	0.424961	0.858101	0.108277	0.110705	0.78191	0.107385	0.188924	0.129373	0.467649	0.214055	0.0642253	1.61865e-06	0.894247	0.0415264	0.160188	0.0849439	0.665502
476	30040.7	0	1.34927	1.35073	-28354.1	1688.41	Standard of care	0.0222333	0.430554	30040.7	0.436769	59.4285	0.0371223	0.0363748	0.152244	0.811381	0.316141	0.0574846	0.626374	0.0245218	0.00675853	0.96872	0.0153028	0.0613741	0.923323	0.304469	0.453255	0.12524	0.540018	0.020094	0.0201376	0.437109	0.43133	0.837966	0.100979	0.137771	0.739491	0.122738	0.184932	0.155311	0.55701	0.102747	0.0316593	3.63363e-05	0.91626	0.0520443	0.172297	0.0993043	0.593726
477	30471.3	0	1.71404	1.71164	-28328.8	2139.55	Standard of care	0.00765743	0.422519	30471.3	0.384671	62.303	0.0163891	0.0375127	0.132158	0.830329	0.279617	0.0249594	0.695423	0.00757666	0.0125983	0.979825	0.022393	0.0655383	0.912069	0.357499	0.86679	0.125886	0.455556	0.0256677	0.025639	0.384718	0.422797	0.802156	0.120258	0.0722221	0.809037	0.118741	0.257447	0.158914	0.447748	0.135892	0.0473676	0.00438029	0.909644	0.0386084	0.128178	0.0489697	0.747062
478	28236.8	0	1.77191	1.77359	-26021.9	2216.99	Standard of care	0.0124641	0.475235	28236.8	0.493516	61.5193	0.0511434	0.0485923	0.134855	0.816553	0.279377	0.0517027	0.66892	0.0454751	0.00701841	0.947507	0.022277	0.0787149	0.899008	0.382737	0.795997	0.118687	0.46889	0.0264866	0.026529	0.493651	0.475647	0.818066	0.0731341	0.071991	0.83181	0.0961994	0.288747	0.167494	0.439432	0.104326	0.0494896	0.000733045	0.924668	0.0251097	0.134995	0.0744556	0.682423
479	29591.9	0	2.56124	2.56397	-26390.4	3204.96	Standard of care	0.00826887	0.443341	29591.9	0.48304	56.6207	0.0315556	0.0537788	0.153465	0.792756	0.288128	0.0453508	0.666521	0.0128664	0.0273298	0.959804	0.0342373	0.087561	0.878202	0.358241	0.74258	0.135638	0.45211	0.0383542	0.0384073	0.483116	0.443675	0.855433	0.101419	0.130558	0.719618	0.149824	0.258909	0.126017	0.472696	0.142378	0.0186972	0.00219584	0.936502	0.0426049	0.167467	0.0701875	0.675639
480	30380.3	0	1.65854	1.66127	-28307.1	2076.59	Standard of care	0.0104911	0.432419	30380.3	0.460443	61.398	0.056466	0.0420054	0.203262	0.754733	0.300859	0.0236288	0.675513	0.00520886	0.0260027	0.968788	0.0207082	0.0792718	0.90002	0.347293	0.465288	0.121828	0.473445	0.0247767	0.0248311	0.460499	0.432979	0.861144	0.0856888	0.0976239	0.741089	0.161287	0.266662	0.129194	0.471765	0.132379	0.0451527	0.0162257	0.906781	0.0318405	0.121786	0.0709375	0.725622
481	29888.3	0	1.1284	1.13267	-28477.8	1415.84	Standard of care	0.0103074	0.410567	29888.3	0.450413	56.8767	0.0223692	0.0233306	0.157786	0.818883	0.350116	0.0213382	0.628545	0.0122874	0.0273998	0.960313	0.0125163	0.0829913	0.904492	0.314852	0.433478	0.13048	0.463873	0.0168496	0.0169277	0.450462	0.411014	0.814506	0.131339	0.118618	0.825259	0.0561235	0.27268	0.138495	0.485492	0.103333	0.0171724	0.00724113	0.93176	0.0438262	0.177557	0.0338272	0.735353
482	31825.6	0	0.727547	0.731447	-30916.1	914.309	Standard of care	0.00746967	0.423834	31825.6	0.494444	56.6604	0.0486621	0.0500596	0.146348	0.803593	0.257759	0.0379109	0.70433	0.0302767	0.0198766	0.949847	0.00637127	0.0930402	0.900588	0.390223	0.829097	0.123112	0.487261	0.0108446	0.0109152	0.494506	0.424117	0.828368	0.09926	0.0853161	0.793152	0.121532	0.272218	0.130311	0.480167	0.117304	0.0305243	0.00797469	0.927465	0.0340358	0.110807	0.0866319	0.731626
483	31619.4	0	1.06374	1.06288	-30289.7	1328.59	Standard of care	0.0125711	0.442851	31619.4	0.434695	56.8175	0.0379465	0.0351127	0.149165	0.815723	0.273587	0.0506152	0.675797	0.0158845	0.0198509	0.964265	0.00990051	0.119102	0.870998	0.382924	0.445611	0.119245	0.488002	0.0158467	0.0158576	0.434849	0.443323	0.743322	0.1469	0.118376	0.765831	0.115793	0.260584	0.219919	0.457544	0.0619518	0.067841	0.00534362	0.891905	0.0349099	0.108377	0.0650497	0.7531
484	30623.7	0	2.94815	2.94858	-26938.5	3685.72	Standard of care	0.00403925	0.4261	30623.7	0.449009	54.0001	0.0158367	0.0332766	0.176599	0.790125	0.19835	0.035622	0.766028	0.0550389	0.0173899	0.927571	0.0403418	0.0901489	0.869509	0.387403	0.944372	0.125978	0.475395	0.0441964	0.0442084	0.449042	0.426287	0.823722	0.0904605	0.0787176	0.835383	0.0858998	0.201507	0.15911	0.550789	0.088594	0.0847186	0.000154883	0.838428	0.0766983	0.127583	0.0632061	0.73998
485	31202.9	0	1.14946	1.14815	-29766.1	1435.19	Standard of care	0.011828	0.459582	31202.9	0.446196	57.6854	0.0345094	0.0579438	0.153759	0.788297	0.261204	0.0573258	0.68147	0.017623	0.0137138	0.968663	0.0123901	0.0895909	0.898019	0.294396	0.725514	0.134318	0.50595	0.0171485	0.0171461	0.446361	0.460003	0.81001	0.11055	0.130305	0.694468	0.175227	0.307526	0.138509	0.471421	0.0825435	0.0399301	0.00108251	0.917677	0.0413103	0.153387	0.106733	0.68774
486	28594	0	1.28048	1.27629	-26993.4	1595.36	Standard of care	0.0124855	0.454723	28594	0.400092	56.2295	0.00777236	0.0676265	0.163276	0.769097	0.204951	0.0543785	0.74067	0.00852417	0.04687	0.944606	0.0160563	0.0507836	0.93316	0.366113	0.725309	0.129372	0.469304	0.0191196	0.0190657	0.400259	0.455237	0.837415	0.0729296	0.0776951	0.820744	0.101561	0.249738	0.17427	0.439422	0.136569	0.0404046	0.00533163	0.902005	0.052259	0.146106	0.134636	0.59463
487	28661	0	4.09157	4.094	-23546.6	5117.5	Standard of care	0.0140697	0.416627	28661	0.44136	60.0218	0.0339567	0.0365591	0.132353	0.831088	0.246504	0.0693754	0.684121	0.0376128	0.0198605	0.942527	0.0566445	0.100407	0.842948	0.38657	0.398408	0.122157	0.497408	0.0612756	0.0613343	0.441598	0.417107	0.789807	0.074448	0.0507281	0.761212	0.18806	0.206506	0.180731	0.525733	0.0870297	0.0622071	0.000127903	0.902725	0.0349404	0.190926	0.0974304	0.635978
488	32702.1	0	2.84936	2.854	-29140.4	3567.5	Standard of care	0.0135485	0.458202	32702.1	0.491509	62.104	0.0497754	0.0503518	0.114343	0.835305	0.319046	0.070018	0.610936	0.0084991	0.0163256	0.975175	0.0393213	0.0592509	0.901428	0.30769	0.888235	0.126335	0.492126	0.0426586	0.0427421	0.491716	0.458574	0.786699	0.0962121	0.100538	0.813135	0.0863269	0.235981	0.144721	0.458476	0.160822	0.0265382	7.2544e-05	0.920782	0.0526075	0.165512	0.0892693	0.665673
489	30452.4	0	1.30353	1.30323	-28823	1629.04	Standard of care	0.0109106	0.435037	30452.4	0.430828	58.383	0.010411	0.0492808	0.199443	0.751276	0.282474	0.0372027	0.680323	0.0709975	0.0121873	0.916815	0.0138415	0.110423	0.875736	0.350353	0.765419	0.127823	0.467771	0.0194582	0.0194713	0.430922	0.435607	0.818161	0.118432	0.0950154	0.760097	0.144888	0.239392	0.139858	0.512508	0.108243	0.0472703	0.0115471	0.901712	0.0394703	0.159047	0.135994	0.656397
490	28989.4	0	2.44921	2.44849	-25927.9	3060.61	Standard of care	0.0120917	0.445112	28989.4	0.437231	54.204	0.0329621	0.0365839	0.163704	0.799712	0.290844	0.0151187	0.694037	0.0250209	0.00469175	0.970287	0.03477	0.0284837	0.936746	0.350711	0.463029	0.122232	0.425803	0.0366683	0.0366629	0.437269	0.445666	0.747472	0.152711	0.0961959	0.731557	0.172247	0.20128	0.179309	0.507364	0.112048	0.0255015	0.000522821	0.90206	0.0719154	0.118439	0.0765893	0.757093
491	28249.5	0	1.21273	1.21505	-26733.6	1518.82	Standard of care	0.012656	0.429137	28249.5	0.451234	59.7405	0.0107669	0.0605076	0.121904	0.817589	0.290377	0.017589	0.692034	0.0342644	0.0163673	0.949368	0.0155424	0.0322348	0.952223	0.30245	0.601461	0.1264	0.487917	0.0181337	0.0181753	0.451286	0.429531	0.866235	0.0635675	0.0477027	0.826423	0.125875	0.368171	0.121395	0.424528	0.0859068	0.0607049	0.00561904	0.921437	0.0122394	0.145912	0.0945084	0.665754
492	31571.8	0	2.20436	2.21124	-28816.4	2764.04	Standard of care	0.00941821	0.405491	31571.8	0.465795	60.9652	0.00585379	0.0694745	0.195156	0.73537	0.382415	0.0277133	0.589871	0.00546714	0.0204288	0.974104	0.0302967	0.0419061	0.927797	0.331171	0.917595	0.12596	0.48196	0.0330024	0.0331118	0.465854	0.405986	0.856093	0.0581565	0.0437902	0.753357	0.202853	0.372381	0.131867	0.436488	0.0592639	0.0199219	0.00174418	0.919485	0.0588488	0.153416	0.0862164	0.648993
493	32057.3	0	2.61572	2.62546	-28787.7	3281.82	Standard of care	0.0131512	0.413636	32057.3	0.504787	60.6647	0.0547398	0.0545416	0.139091	0.806368	0.324887	0.031861	0.643252	0.05858	0.00410466	0.937315	0.0351967	0.0706603	0.894143	0.29189	0.670804	0.136246	0.456103	0.0391453	0.0393072	0.504869	0.414139	0.795483	0.110118	0.11844	0.736934	0.144626	0.376551	0.12956	0.372083	0.121806	0.0316591	0.00391703	0.918512	0.0459118	0.121418	0.0592208	0.697538
494	30525.5	0	1.34642	1.34868	-28842.4	1685.86	Standard of care	0.0135296	0.466589	30525.5	0.489899	55.659	0.0562068	0.0624121	0.153579	0.784009	0.268805	0.0644453	0.66675	0.0362469	0.0126316	0.951122	0.0148055	0.0994504	0.885744	0.338387	0.477114	0.124307	0.458806	0.0200734	0.0201301	0.490078	0.467114	0.861869	0.0878673	0.106058	0.759658	0.134284	0.252804	0.189071	0.440202	0.117922	0.0437824	0.000158459	0.861396	0.0946631	0.134521	0.0920071	0.680008
495	29686.4	0	2.3534	2.35122	-26744.7	2939.02	Standard of care	0.0116268	0.434181	29686.4	0.405624	58.7725	0.0530205	0.0748964	0.135277	0.789826	0.207281	0.0350499	0.757669	0.0149101	0.0143575	0.970732	0.0322358	0.0533374	0.914427	0.317714	0.549448	0.129249	0.511521	0.0352331	0.0352096	0.405732	0.434559	0.771426	0.11309	0.042856	0.886405	0.070739	0.33682	0.136687	0.385903	0.14059	0.0461335	0.000334045	0.91445	0.0390827	0.13576	0.103606	0.665949
496	28807.7	0	1.58481	1.58789	-26826.7	1984.87	Standard of care	0.0107031	0.429085	28807.7	0.475257	59.2668	0.0271011	0.0663785	0.143159	0.790463	0.227917	0.0127271	0.759356	0.0319911	0.0262655	0.941743	0.0208189	0.0502299	0.928951	0.396953	0.675052	0.130611	0.480502	0.0237096	0.023765	0.475287	0.429481	0.833933	0.0538266	0.0551529	0.784026	0.160821	0.246132	0.146553	0.496297	0.111019	0.0361969	0.00511325	0.919418	0.0392716	0.188666	0.0888435	0.684327
497	31283.4	0	1.06227	1.06563	-29955.6	1332.03	Standard of care	0.0123401	0.408766	31283.4	0.437447	60.7562	0.0252353	0.06537	0.172226	0.762404	0.298691	0.0325399	0.668769	0.0247976	0.0191844	0.956018	0.0113891	0.0750166	0.913594	0.37137	0.679295	0.136361	0.519985	0.0158432	0.0159078	0.437548	0.409287	0.811002	0.0943186	0.0584551	0.774245	0.1673	0.203782	0.128794	0.581307	0.0861172	0.0523888	0.0147395	0.906168	0.0267037	0.155668	0.0822572	0.679743
498	28670.7	0	3.35311	3.35695	-24479.3	4196.19	Standard of care	0.0101578	0.438139	28670.7	0.475024	56.8091	0.0281408	0.0525689	0.136159	0.811272	0.325624	0.029693	0.644683	0.0301972	0.048148	0.921655	0.0465998	0.0703439	0.883056	0.343	0.660772	0.127329	0.524109	0.0502374	0.0503074	0.475096	0.438461	0.78087	0.107959	0.0780857	0.742507	0.179407	0.251852	0.131242	0.474201	0.142705	0.0345346	1.98667e-05	0.934911	0.0305345	0.156612	0.06867	0.667338
499	29850.3	0	2.19128	2.19283	-27111.2	2741.04	Standard of care	0.0145656	0.434819	29850.3	0.450932	57.2544	0.0422886	0.0318812	0.183041	0.785078	0.219535	0.0289473	0.751517	0.0208597	0.00354573	0.975595	0.0280788	0.0958307	0.876091	0.330508	0.440843	0.132077	0.498272	0.0327498	0.0327957	0.451032	0.435475	0.860675	0.0832034	0.0846573	0.841646	0.0736964	0.310976	0.174028	0.441369	0.0736266	0.0788575	0.00260043	0.843024	0.0755178	0.136744	0.0425585	0.753842
500	28618.6	0	2.16578	2.16401	-25911.4	2705.01	Standard of care	0.00649254	0.443967	28618.6	0.396348	61.0061	0.0211463	0.0393935	0.172055	0.788551	0.198935	0.0330639	0.768001	0.0282646	0.0471387	0.924597	0.0288903	0.0776988	0.893411	0.388721	0.55027	0.126506	0.508289	0.03244	0.0324203	0.396406	0.444234	0.821384	0.110378	0.116156	0.752118	0.131725	0.333504	0.174571	0.370475	0.121451	0.0557852	0.00961016	0.91306	0.0215451	0.143309	0.0954826	0.643661
501	32219.8	0	1.83132	1.83977	-29930.6	2299.71	Standard of care	0.0143928	0.433057	32219.8	0.482792	54.7158	0.0242002	0.0261533	0.162415	0.811432	0.340905	0.0124565	0.646639	0.00913844	0.00298777	0.987874	0.0222577	0.0950939	0.882648	0.37375	0.573211	0.133717	0.535103	0.0273743	0.0275255	0.482835	0.433591	0.840429	0.09371	0.0854284	0.805886	0.108685	0.297532	0.184438	0.401516	0.116515	0.0338464	9.54287e-06	0.955408	0.0107358	0.201848	0.0628737	0.665973
502	30112.3	0	2.25216	2.25236	-27297.1	2815.45	Standard of care	0.00737511	0.465772	30112.3	0.468624	59.9111	0.0054813	0.0223449	0.200968	0.776687	0.30063	0.0458785	0.653492	0.0402557	0.00612253	0.953622	0.0305371	0.0645031	0.90496	0.398053	0.76187	0.124835	0.538696	0.033734	0.033745	0.468709	0.466092	0.802472	0.146814	0.169623	0.712624	0.117753	0.324888	0.161183	0.359991	0.153938	0.0280511	0.00952917	0.925558	0.0368617	0.124992	0.0945358	0.741856
503	29748.1	0	2.02198	2.02004	-27220.7	2525.05	Standard of care	0.0100935	0.460688	29748.1	0.435075	58.2824	0.0387749	0.0303114	0.190912	0.778777	0.242943	0.0118514	0.745205	0.0190097	0.00604565	0.974945	0.0271249	0.0615622	0.911313	0.351122	0.732392	0.120522	0.504148	0.0302578	0.0302384	0.435105	0.461141	0.764227	0.12114	0.054526	0.736699	0.208775	0.306755	0.127356	0.465097	0.100792	0.0682674	1.34067e-07	0.907605	0.0241277	0.190273	0.101174	0.623382
504	30403	0	2.42776	2.42766	-27368.3	3034.58	Standard of care	0.00944439	0.463342	30403	0.462087	59.2927	0.045651	0.0562291	0.2435	0.700271	0.234801	0.0248602	0.740339	0.0169986	0.0244185	0.958583	0.0318025	0.0953963	0.872801	0.357002	0.687997	0.123415	0.53404	0.0363209	0.0363339	0.462146	0.463846	0.780801	0.142029	0.0458456	0.796373	0.157782	0.283383	0.238926	0.340663	0.137028	0.0778705	0.000285242	0.843515	0.0783297	0.0931048	0.0824242	0.741306
505	29975.6	0	1.70705	1.70149	-27841.8	2126.86	Standard of care	0.0155308	0.474986	29975.6	0.422493	61.5572	0.0356862	0.0426178	0.146837	0.810545	0.253856	0.0407409	0.705403	0.0191959	0.0186655	0.962139	0.0202466	0.101371	0.878382	0.387343	0.574463	0.14129	0.435427	0.0254809	0.0254219	0.42263	0.475566	0.807245	0.106434	0.0655821	0.826835	0.107583	0.273169	0.156082	0.451684	0.119065	0.0683817	0.00425515	0.895635	0.0317281	0.100029	0.149555	0.683375
506	29129.2	0	1.51469	1.51728	-27235.9	1896.6	Standard of care	0.0177897	0.469563	29129.2	0.490003	57.9208	0.0562563	0.0355573	0.149661	0.814781	0.274143	0.0293642	0.696492	0.0368239	0.0194614	0.943715	0.0190146	0.0566471	0.924338	0.392	0.734813	0.132383	0.450508	0.0225953	0.0226518	0.490107	0.470236	0.865536	0.0788424	0.0667948	0.853514	0.0796915	0.265221	0.162576	0.475738	0.0964645	0.0639944	9.51442e-05	0.919389	0.0165218	0.173686	0.0715097	0.675871
507	27640.7	0	1.7025	1.70857	-25512.5	2135.71	Standard of care	0.0167881	0.429658	27640.7	0.476768	57.7461	0.0376457	0.0580351	0.170626	0.771339	0.281771	0.0209418	0.697287	0.0208986	0.0156728	0.963429	0.0221617	0.04709	0.930748	0.306726	0.758144	0.12713	0.44124	0.0254198	0.0255239	0.476839	0.430455	0.808146	0.124092	0.128762	0.734234	0.137004	0.345069	0.142332	0.402857	0.109741	0.0626619	2.16726e-08	0.892585	0.0447528	0.120209	0.0862425	0.745552
508	30103.4	0	3.39738	3.39792	-25856.6	4247.4	Standard of care	0.00775927	0.447628	30103.4	0.46092	57.4953	0.010735	0.0554895	0.11539	0.82912	0.182518	0.0629828	0.7545	0.0148464	0.0126899	0.972464	0.0479375	0.0673307	0.884732	0.31473	0.378733	0.128837	0.45739	0.0509243	0.050941	0.461025	0.447862	0.817075	0.111562	0.101428	0.813567	0.0850055	0.291666	0.178521	0.473769	0.0560433	0.0642131	0.00287458	0.901566	0.0313459	0.130761	0.0892539	0.724475
509	32405.9	0	1.95346	1.95853	-29964.1	2448.16	Standard of care	0.0132326	0.438881	32405.9	0.495606	55.6049	0.0406222	0.0468015	0.124598	0.8286	0.23929	0.0431253	0.717585	0.0321705	0.0503411	0.917488	0.0264902	0.0460725	0.927437	0.347711	0.6159	0.133901	0.490958	0.0292226	0.0293096	0.495728	0.439289	0.8156	0.0937569	0.0819408	0.77216	0.145899	0.200442	0.182268	0.524821	0.0924692	0.0766123	7.99961e-05	0.849606	0.0737022	0.212237	0.0663117	0.631957
510	27685.8	0	1.25432	1.25592	-26117.9	1569.9	Standard of care	0.0155486	0.425669	27685.8	0.43947	61.7503	0.0295327	0.0512388	0.209062	0.739699	0.243961	0.0495296	0.70651	0.0324856	0.0456698	0.921845	0.0158057	0.0370181	0.947176	0.318834	0.763364	0.124388	0.528547	0.0186902	0.0187229	0.439669	0.426439	0.836381	0.0932121	0.108077	0.749155	0.142768	0.171597	0.156977	0.548744	0.122682	0.0498403	0.0172971	0.882022	0.0508403	0.151161	0.0873425	0.683635
511	32458.7	0	8.99755	9.00657	-21211.8	11258.2	Standard of care	0.020701	0.399961	32458.7	0.456769	55.0908	0.0425628	0.0391431	0.213487	0.74737	0.250619	0.0239635	0.725417	0.0186846	0.033867	0.947448	0.13237	0.0805821	0.787048	0.32139	0.671126	0.138045	0.499018	0.134807	0.134969	0.456885	0.401106	0.781978	0.165329	0.0813126	0.735632	0.183056	0.199299	0.200721	0.434317	0.165663	0.0202489	0.00730276	0.91234	0.0601082	0.188118	0.116564	0.615335
512	29260.2	0	1.94998	1.95037	-26822.7	2437.96	Standard of care	0.00705831	0.440705	29260.2	0.454042	58.8705	0.0339981	0.0473047	0.119149	0.833546	0.223959	0.0402246	0.735816	0.0887751	0.0261596	0.885065	0.0238309	0.118022	0.858147	0.32355	0.636344	0.130382	0.458929	0.0291925	0.0292116	0.454104	0.440927	0.793861	0.109517	0.0953211	0.823893	0.0807863	0.253169	0.133575	0.483538	0.129718	0.0232213	0.0018273	0.963807	0.0111448	0.226319	0.0613552	0.611885
513	28634.3	0	1.61749	1.61416	-26612.4	2017.7	Standard of care	0.00470434	0.453265	28634.3	0.378083	56.2527	0.0303255	0.0377265	0.121235	0.841038	0.290899	0.0351443	0.673957	0.0173945	0.0126168	0.969989	0.0204676	0.0811421	0.89839	0.301246	0.432649	0.121892	0.515614	0.0242322	0.0241879	0.378129	0.453397	0.814232	0.101719	0.0628822	0.878912	0.0582056	0.309993	0.11467	0.476861	0.0984751	0.0347935	0.0164426	0.908249	0.040515	0.158183	0.102128	0.632513
514	30134.1	0	1.22774	1.23303	-28599.4	1541.29	Standard of care	0.014152	0.424772	30134.1	0.469619	60.8826	0.00924196	0.0127815	0.152373	0.834846	0.271486	0.054745	0.673769	0.0186021	0.0551441	0.926254	0.015407	0.0482466	0.936346	0.333127	0.577302	0.123207	0.495032	0.018319	0.0184099	0.469797	0.425321	0.760208	0.149908	0.0697596	0.83477	0.0954703	0.25346	0.140409	0.466868	0.139263	0.0446466	0.00582964	0.918209	0.0313145	0.152491	0.0839043	0.670035
515	30136.8	0	3.5156	3.51353	-25742.3	4391.91	Standard of care	0.00923164	0.44215	30136.8	0.407696	61.512	0.034268	0.0437201	0.117954	0.838326	0.24405	0.0516108	0.704339	0.035463	0.00251233	0.962025	0.0488921	0.0818198	0.869288	0.347048	0.511303	0.134629	0.464	0.0526801	0.0526607	0.40781	0.442432	0.840399	0.0776741	0.112567	0.780103	0.10733	0.330534	0.185541	0.409539	0.0743864	0.0706256	0.00240451	0.867309	0.0596609	0.155713	0.0986651	0.674236
516	32687.6	0	1.32963	1.33114	-31025.5	1663.93	Standard of care	0.0099863	0.437668	32687.6	0.455713	54.604	0.046733	0.072002	0.181863	0.746135	0.283391	0.0428073	0.673801	0.0320079	0.0260877	0.941904	0.0144975	0.105198	0.880304	0.338161	0.473694	0.132611	0.499753	0.0198476	0.0198867	0.455814	0.438111	0.791149	0.118088	0.0775413	0.842207	0.0802515	0.272312	0.151947	0.439155	0.136587	0.0795938	0.00305179	0.873953	0.0434014	0.184844	0.0567166	0.713283
517	29824.9	0	2.37038	2.3811	-26861.9	2976.38	Standard of care	0.0122536	0.395808	29824.9	0.495365	59.54	0.0282824	0.0338927	0.119901	0.846206	0.30168	0.0177724	0.680548	0.0333943	0.0119862	0.954619	0.0323059	0.0577762	0.909918	0.356258	0.84693	0.131118	0.492179	0.0354944	0.035668	0.495412	0.3962	0.819877	0.099801	0.104248	0.778987	0.116766	0.355518	0.125922	0.417174	0.101386	0.0560106	4.74417e-06	0.890865	0.0531197	0.113216	0.0830372	0.753516
518	31554.3	0	1.5341	1.53608	-29636.7	1920.11	Standard of care	0.00934268	0.419859	31554.3	0.458673	58.6303	0.0250362	0.033986	0.193988	0.772026	0.214354	0.0253943	0.760252	0.0321576	0.0613718	0.906471	0.0203405	0.0502373	0.929422	0.362618	0.827568	0.116418	0.45746	0.0229358	0.0229733	0.458725	0.420363	0.878741	0.0583861	0.0793478	0.817062	0.10359	0.180367	0.22651	0.495804	0.09732	0.0684538	0.000594666	0.905827	0.0251244	0.154271	0.123932	0.636053
519	31718.5	0	3.54253	3.5359	-27290.4	4419.88	Standard of care	0.0177464	0.456124	31718.5	0.412858	63.5703	0.0384419	0.0771914	0.178785	0.744024	0.288842	0.0572591	0.653899	0.0217714	0.00510677	0.973122	0.0498777	0.0437542	0.906368	0.408258	0.468432	0.145102	0.479409	0.0530118	0.0529248	0.413103	0.456892	0.842257	0.111722	0.0702809	0.793835	0.135885	0.219333	0.137423	0.528293	0.114951	0.0557435	0.00306716	0.848966	0.092223	0.0976456	0.0830162	0.702411
520	29346.9	0	5.38825	5.38832	-22611.6	6735.41	Standard of care	0.017845	0.447061	29346.9	0.447676	55.0778	0.01326	0.0546655	0.142753	0.802581	0.22837	0.0502061	0.721424	0.0098316	0.0293764	0.960792	0.0775377	0.0729208	0.849541	0.394164	0.741204	0.133077	0.457723	0.0807176	0.0807396	0.447872	0.447723	0.751095	0.18868	0.0891025	0.805081	0.105817	0.271808	0.153932	0.46712	0.10714	0.0350428	0.00391809	0.908753	0.0522857	0.182035	0.0850949	0.69226
521	30749.8	0	2.46829	2.47253	-27664.4	3090.67	Standard of care	0.00851505	0.411373	30749.8	0.464462	58.8113	0.0374881	0.0584914	0.135627	0.805882	0.304031	0.0339771	0.661992	0.00646583	0.020214	0.97332	0.0303084	0.146124	0.823568	0.376116	0.550162	0.118109	0.475095	0.0369463	0.0370308	0.464527	0.411687	0.767681	0.0988783	0.0476534	0.863125	0.0892219	0.295733	0.138477	0.476102	0.089688	0.0554031	0.000506339	0.907538	0.0365524	0.140029	0.051626	0.740429
522	30514.6	0	3.44288	3.44122	-26211	4301.52	Standard of care	0.00901421	0.475916	30514.6	0.455001	59.1882	0.0201163	0.0670203	0.147577	0.785402	0.27748	0.0425876	0.679932	0.0153193	0.0381077	0.946573	0.049034	0.048531	0.902435	0.366883	0.60929	0.131722	0.50432	0.0515941	0.0515763	0.455092	0.476216	0.813959	0.122193	0.14875	0.711108	0.140142	0.215807	0.197726	0.477333	0.109135	0.010134	0.00831135	0.930347	0.0512078	0.166607	0.0740181	0.701061
523	31055.2	0	0.998979	0.997514	-29806.5	1246.89	Standard of care	0.0229398	0.520596	31055.2	0.511583	57.6784	0.0108026	0.0674383	0.162649	0.769912	0.252425	0.062998	0.684577	0.0194418	0.0106044	0.969954	0.00969906	0.0765396	0.913761	0.359794	0.753182	0.124791	0.451774	0.0148097	0.0148197	0.511862	0.521454	0.794805	0.127562	0.0771594	0.743273	0.179568	0.248389	0.144541	0.452244	0.154826	0.0904134	0.00648019	0.854801	0.048305	0.192871	0.0643943	0.688945
524	29212.9	0	2.60748	2.61244	-25953.6	3265.55	Standard of care	0.0141982	0.433737	29212.9	0.490471	62.5254	0.0525901	0.0176012	0.210728	0.771671	0.223521	0.0752874	0.701192	0.0368189	0.0260562	0.937125	0.035982	0.0604191	0.903599	0.317445	0.612453	0.12923	0.488361	0.0389791	0.0390672	0.490703	0.434492	0.822524	0.122837	0.0830146	0.832438	0.084547	0.202429	0.144872	0.503986	0.148713	0.0277839	0.000882111	0.933432	0.0379023	0.15263	0.0798476	0.634131
525	32006.7	0	2.993	3.00091	-28265.4	3751.13	Standard of care	0.0105448	0.403914	32006.7	0.493801	63.4934	0.0342749	0.0536666	0.187713	0.758621	0.267846	0.0348964	0.697258	0.0203299	0.042016	0.937654	0.0393764	0.117102	0.843521	0.334988	0.672713	0.123796	0.509336	0.0447962	0.0449364	0.493885	0.404421	0.780149	0.155395	0.0936803	0.755501	0.150819	0.307705	0.194607	0.356443	0.141245	0.0339363	0.0144461	0.91934	0.0322779	0.123095	0.0965673	0.629547
526	29855.6	0	1.57435	1.57775	-27887.7	1972.19	Standard of care	0.0112243	0.426911	29855.6	0.463434	56.5496	0.0417055	0.0503134	0.155388	0.794299	0.268547	0.0387452	0.692708	0.00849814	0.0330085	0.958493	0.0166759	0.145261	0.838063	0.297791	0.74028	0.124961	0.481465	0.0235028	0.0235808	0.463533	0.427365	0.784597	0.0968436	0.0742684	0.833076	0.0926559	0.21189	0.169228	0.494358	0.124524	0.0385242	0.00200376	0.915483	0.0439889	0.0995291	0.0747201	0.72076
527	28946.4	0	1.17893	1.18071	-27472.7	1475.88	Standard of care	0.0187096	0.449905	28946.4	0.46047	58.3076	0.0350809	0.0571076	0.135523	0.807369	0.326077	0.0288126	0.64511	0.0400686	0.0138382	0.946093	0.0123327	0.0783395	0.909328	0.31185	0.386068	0.123931	0.470095	0.0175611	0.0176118	0.46059	0.450552	0.787393	0.141948	0.110167	0.75678	0.133053	0.300935	0.130193	0.46422	0.104652	0.042867	0.00124093	0.911844	0.0440479	0.16896	0.104779	0.603351
528	30012.5	0	2.31578	2.3168	-27117.8	2896	Standard of care	0.00441746	0.439503	30012.5	0.469267	58.4489	0.0334399	0.0782494	0.146293	0.775458	0.258155	0.044616	0.697229	0.0266475	0.00721958	0.966133	0.0309074	0.0838175	0.885275	0.38264	0.816889	0.129318	0.502965	0.0347041	0.0347256	0.469313	0.43966	0.820664	0.0874968	0.0720248	0.815894	0.112081	0.26947	0.127391	0.414729	0.18841	0.0988773	0.00441848	0.866163	0.030541	0.176934	0.0934157	0.624674
529	30371.9	0	1.45477	1.45193	-28553.5	1814.91	Standard of care	0.0148844	0.465839	30371.9	0.438079	61.5017	0.00796144	0.0401842	0.102378	0.857438	0.241464	0.0243288	0.734208	0.0239332	0.0296084	0.946458	0.0183983	0.0559222	0.925679	0.348467	0.798025	0.135502	0.475127	0.0217516	0.0217224	0.438163	0.466209	0.828221	0.130896	0.0632463	0.757358	0.179396	0.32315	0.118782	0.422816	0.135252	0.0467379	0.000159649	0.904468	0.0486347	0.155769	0.0720928	0.707262
530	32059.2	0	1.52777	1.52756	-30149.4	1909.45	Standard of care	0.0179295	0.420855	32059.2	0.419618	55.3097	0.0550854	0.0141756	0.140954	0.844871	0.318074	0.0361078	0.645818	0.025401	0.0458763	0.928723	0.0172273	0.0989365	0.883836	0.382609	0.687136	0.130876	0.485821	0.0227741	0.022798	0.419777	0.42151	0.811387	0.10713	0.0568814	0.783339	0.159779	0.234577	0.202344	0.489596	0.0734833	0.0716294	0.00016527	0.860164	0.0680415	0.175239	0.103981	0.660583
531	29848.6	0	2.28439	2.28386	-26993.1	2854.83	Standard of care	0.00678316	0.457544	29848.6	0.44359	57.2176	0.00760577	0.0441688	0.168815	0.787016	0.198339	0.018802	0.782859	0.0349449	0.025922	0.939133	0.0296879	0.101575	0.868737	0.317604	0.856946	0.122732	0.514037	0.0342228	0.0342257	0.443622	0.457809	0.808074	0.0837092	0.0366348	0.835533	0.127832	0.326791	0.189659	0.337168	0.146382	0.0251213	8.80047e-06	0.950895	0.0239752	0.153602	0.0713204	0.714959
532	28822	0	1.69505	1.69925	-26703.2	2124.06	Standard of care	0.00688199	0.423048	28822	0.511977	55.4674	0.0170587	0.0439825	0.108059	0.847958	0.254225	0.0396814	0.706094	0.0333701	0.024978	0.941652	0.0212257	0.0903151	0.888459	0.349053	0.64476	0.143274	0.465828	0.025384	0.0254583	0.51203	0.423244	0.819112	0.0909373	0.0537981	0.789497	0.156705	0.2952	0.0820272	0.47813	0.144643	0.0451079	0.000148375	0.911561	0.0431831	0.197408	0.0871205	0.598018
533	32508	0	2.97185	2.97664	-28793.2	3720.8	Standard of care	0.00671911	0.414986	32508	0.515734	56.1377	0.00624555	0.0196291	0.130376	0.849995	0.24467	0.0215121	0.733817	0.0231032	0.00867523	0.968222	0.0407642	0.0872814	0.871954	0.305312	0.640641	0.141298	0.478724	0.0445452	0.044628	0.515762	0.415215	0.834366	0.122381	0.0978285	0.703828	0.198343	0.22943	0.131021	0.47432	0.165229	0.0742373	0.00609257	0.855428	0.0642424	0.128486	0.0818036	0.706561
534	32029.9	0	1.99558	1.99549	-29535.4	2494.37	Standard of care	0.0127136	0.477941	32029.9	0.476354	57.854	0.0392114	0.0578661	0.166048	0.776086	0.230353	0.0585545	0.711093	0.0821949	0.00959846	0.908207	0.0276651	0.0305095	0.941825	0.370055	0.675266	0.120352	0.424008	0.0298466	0.0298516	0.4765	0.478499	0.813832	0.146418	0.0561149	0.836818	0.107067	0.238823	0.11329	0.527981	0.119906	0.050675	0.000210255	0.912618	0.0364965	0.167196	0.111003	0.683347
535	29170.3	0	4.08259	4.08283	-24067.1	5103.53	Standard of care	0.0111541	0.460391	29170.3	0.46359	56.2556	0.0258077	0.0413307	0.150446	0.808223	0.219305	0.0367186	0.743977	0.0145093	0.00916116	0.97633	0.0580101	0.0708795	0.87111	0.355096	0.754978	0.136599	0.494182	0.0611744	0.0611914	0.463684	0.460786	0.865358	0.103904	0.0842575	0.852639	0.0631031	0.26547	0.142911	0.360255	0.231364	0.0937782	0.00436941	0.871139	0.0307132	0.126035	0.0621415	0.773864
536	29655.9	0	1.77568	1.77146	-27436.2	2214.33	Standard of care	0.0135768	0.429773	29655.9	0.380523	58.3829	0.0203343	0.0435927	0.233681	0.722727	0.228218	0.0285266	0.743255	0.0171692	0.0245818	0.958249	0.0230157	0.0630919	0.913892	0.327494	0.715993	0.141363	0.44932	0.0265101	0.0264579	0.380616	0.430629	0.858387	0.0558951	0.0678124	0.719439	0.212748	0.311782	0.151023	0.427807	0.109389	0.0362495	0.00920937	0.888706	0.065835	0.127247	0.115823	0.616396
537	30983	0	3.15931	3.16308	-27033.9	3953.85	Standard of care	0.010819	0.438822	30983	0.486236	57.4832	0.0494667	0.0183919	0.0929365	0.888672	0.272496	0.0374602	0.690044	0.0312327	0.0257114	0.943056	0.0443981	0.062303	0.893299	0.333527	0.861107	0.122456	0.456633	0.0473342	0.0474028	0.486319	0.439091	0.847747	0.101539	0.129281	0.745093	0.125626	0.307035	0.160257	0.437882	0.0948263	0.0631857	0.000603716	0.902669	0.0335411	0.178154	0.0666227	0.683896
538	29071.1	0	2.56061	2.55999	-25870.3	3199.99	Standard of care	0.00924585	0.419316	29071.1	0.409683	57.6219	0.0148389	0.0419904	0.143076	0.814934	0.236243	0.0124889	0.751268	0.0209268	0.0126322	0.966441	0.036501	0.0327842	0.930715	0.388094	0.582596	0.131163	0.484358	0.0383681	0.0383634	0.409712	0.41966	0.864348	0.0874376	0.056517	0.805569	0.137914	0.292144	0.188807	0.439676	0.0793732	0.0200361	0.000689404	0.92185	0.0574245	0.213701	0.0668112	0.607646
539	28978	0	2.14578	2.15005	-26295.8	2687.56	Standard of care	0.0112445	0.428551	28978	0.475299	61.5769	0.0507553	0.0444862	0.129877	0.825636	0.286124	0.0380885	0.675788	0.0276435	0.0306204	0.941736	0.0286289	0.0655023	0.905869	0.376595	0.584971	0.134573	0.471614	0.0321097	0.0321863	0.475391	0.428933	0.820831	0.116293	0.062243	0.867912	0.0698454	0.332127	0.151929	0.444692	0.0712519	0.0547848	0.000703797	0.90059	0.0439214	0.136323	0.0849826	0.696287
540	31433.3	0	2.00904	2.01226	-28922	2515.33	Standard of care	0.00835081	0.407359	31433.3	0.464271	53.8278	0.0371122	0.0209833	0.11957	0.859447	0.268729	0.04211	0.689161	0.048887	0.00907471	0.942038	0.0267959	0.0680201	0.905184	0.394305	0.642681	0.128052	0.459353	0.0300848	0.0301424	0.464346	0.407638	0.824068	0.118717	0.091197	0.740739	0.168064	0.299405	0.151305	0.471698	0.077591	0.0619298	0.00106747	0.902538	0.0344643	0.128438	0.0581636	0.74215
541	29149.5	0	2.50833	2.51323	-26014.1	3141.54	Standard of care	0.0136113	0.401399	29149.5	0.443303	61.6635	0.049693	0.0263128	0.182496	0.791192	0.296661	0.0243378	0.679001	0.00464287	0.0323003	0.963057	0.0310517	0.138508	0.83044	0.362335	0.786279	0.124001	0.444831	0.0374816	0.037585	0.443374	0.402122	0.79343	0.12546	0.101228	0.803931	0.0948407	0.228293	0.126243	0.519299	0.126165	0.0413452	0.00267925	0.919732	0.0362436	0.18629	0.059257	0.682327
542	31467.2	0	2.3715	2.37355	-28502.9	2966.94	Standard of care	0.0198561	0.43697	31467.2	0.446856	55.459	0.0466969	0.0464832	0.115204	0.838312	0.382415	0.0928347	0.524751	0.0527537	0.0160735	0.931173	0.0290763	0.104315	0.866608	0.301303	0.42061	0.132709	0.471763	0.0354228	0.0354867	0.447273	0.43756	0.907407	0.0425189	0.0748978	0.776126	0.148976	0.274125	0.127022	0.458674	0.140179	0.0380782	0.000735677	0.919531	0.0416556	0.0890165	0.0433332	0.74436
543	29295.6	0	1.39225	1.39402	-27555.3	1742.53	Standard of care	0.00881749	0.407763	29295.6	0.444225	59.3555	0.0416618	0.0285094	0.131616	0.839875	0.184595	0.0563385	0.759067	0.0248205	0.0210174	0.954162	0.0171221	0.0785848	0.904293	0.329536	0.620894	0.132514	0.513759	0.0208183	0.020856	0.444348	0.408053	0.804263	0.146901	0.0806586	0.785438	0.133904	0.20276	0.128564	0.490482	0.178195	0.0442144	0.000757311	0.922101	0.0329271	0.182366	0.0871279	0.679936
544	31353.9	0	3.96906	3.96167	-26392.6	4952.09	Standard of care	0.0100234	0.469921	31353.9	0.393759	53.8174	0.0169803	0.0399782	0.155311	0.804711	0.296789	0.0380439	0.665167	0.0172652	0.0214527	0.961282	0.0565046	0.058319	0.885176	0.332909	0.428179	0.128793	0.518851	0.0594847	0.0593826	0.393863	0.470267	0.86309	0.100867	0.0826289	0.776422	0.140949	0.200754	0.205926	0.499138	0.0941828	0.0530269	0.0186197	0.907144	0.0212099	0.1183	0.0296686	0.771509
545	29481.4	0	1.65118	1.65564	-27417.5	2069.55	Standard of care	0.0108435	0.420474	29481.4	0.487236	54.6932	0.0502138	0.0355429	0.0822685	0.882189	0.204929	0.0546369	0.740435	0.0272687	0.00775597	0.964975	0.0214102	0.0658398	0.91275	0.412638	0.600296	0.133568	0.513476	0.0247103	0.0247894	0.487371	0.420692	0.718492	0.157946	0.160513	0.736416	0.103071	0.210131	0.161308	0.506336	0.122226	0.0304979	0.00150724	0.930203	0.0377918	0.215946	0.133211	0.603671
546	27801.8	0	1.05128	1.04913	-26487.7	1311.41	Standard of care	0.0154295	0.448716	27801.8	0.426219	58.5429	0.0510851	0.0194059	0.144331	0.836263	0.213287	0.0753943	0.711318	0.0143422	0.0263701	0.959288	0.0110611	0.0900211	0.898918	0.299649	0.669345	0.143222	0.461679	0.0156356	0.0156255	0.426483	0.449282	0.865836	0.0741851	0.0662813	0.780759	0.152959	0.333549	0.150241	0.418152	0.0980579	0.0355043	0.00240204	0.900665	0.0614283	0.214292	0.0551207	0.65068
547	29731.9	0	1.42745	1.42675	-27947.6	1783.43	Standard of care	0.00942582	0.425791	29731.9	0.413286	60.8591	0.0551077	0.0236566	0.181873	0.79447	0.229023	0.0573188	0.713658	0.0418458	0.0192634	0.938891	0.017903	0.0684259	0.913671	0.34121	0.696264	0.127668	0.474277	0.0213259	0.0213249	0.413417	0.426243	0.7635	0.130661	0.0806121	0.805374	0.114014	0.274635	0.13403	0.511898	0.0794368	0.0439499	0.000553108	0.913521	0.0419761	0.166135	0.113177	0.672076
548	29073.6	0	1.05779	1.05904	-27751.4	1323.8	Standard of care	0.00603757	0.437372	29073.6	0.472539	59.485	0.0188236	0.128494	0.154818	0.716688	0.226431	0.0909986	0.68257	0.0395168	0.00959397	0.950889	0.0132137	0.0461196	0.940667	0.31922	0.779556	0.130098	0.459767	0.0158236	0.0158463	0.472655	0.437619	0.831818	0.109208	0.0971235	0.72437	0.178507	0.227096	0.193391	0.409618	0.169895	0.059584	0.000625387	0.867426	0.0723647	0.172535	0.0981018	0.650394
549	29564.1	0	0.875395	0.880624	-28469.8	1100.78	Standard of care	0.00699167	0.397651	29564.1	0.502658	57.0616	0.0534832	0.0444604	0.154654	0.800886	0.243302	0.0181224	0.738576	0.0147484	0.0206289	0.964623	0.00966904	0.0705546	0.919776	0.400429	0.775791	0.121263	0.46932	0.0130712	0.0131587	0.502684	0.397955	0.809852	0.0652679	0.0887531	0.796867	0.11438	0.274625	0.132088	0.415998	0.177289	0.0355981	0.000277081	0.903459	0.0606663	0.12184	0.0747156	0.679434
550	31790.2	0	2.61342	2.62039	-28523.4	3275.49	Standard of care	0.00859815	0.428998	31790.2	0.536695	58.5914	0.0224321	0.0761222	0.144791	0.779087	0.251549	0.0271085	0.721342	0.0110295	0.00432493	0.984646	0.0355769	0.0743851	0.890038	0.324514	0.620631	0.127839	0.468201	0.0391485	0.0392648	0.536739	0.429327	0.83864	0.0993073	0.16552	0.676224	0.158256	0.347507	0.164153	0.395959	0.0923807	0.0611512	0.00419157	0.895448	0.0392097	0.118033	0.0625005	0.719199
551	30157.9	0	1.42689	1.42582	-28374.3	1782.28	Standard of care	0.0114137	0.468118	30157.9	0.455777	58.0275	0.031027	0.0619088	0.182559	0.755532	0.23998	0.0350305	0.724989	0.0150232	0.00649093	0.978486	0.017894	0.0609569	0.921149	0.314722	0.679401	0.136803	0.503975	0.0213196	0.021315	0.455872	0.468592	0.791102	0.11006	0.0833104	0.723475	0.193214	0.21956	0.231936	0.466893	0.0816104	0.0743358	0.00378711	0.893296	0.0285814	0.132411	0.0238735	0.751725
552	27676.7	0	3.37961	3.37986	-23452.2	4224.82	Standard of care	0.0157316	0.457525	27676.7	0.459391	59.2983	0.0084215	0.0571693	0.133764	0.809067	0.289052	0.0499413	0.661007	0.0158123	0.0108955	0.973292	0.0467435	0.0717343	0.881522	0.354139	0.725292	0.130477	0.463541	0.0506038	0.0506263	0.459562	0.458058	0.813705	0.0616688	0.0802167	0.737207	0.182577	0.28203	0.187075	0.447025	0.08387	0.0237185	0.00076705	0.946356	0.0291586	0.141333	0.0352992	0.718993
553	29431.9	0	1.12093	1.12125	-28030.7	1401.56	Standard of care	0.0124396	0.432617	29431.9	0.436505	58.9103	0.0232909	0.0582752	0.150729	0.790996	0.238974	0.0262045	0.734822	0.0303182	0.00551051	0.964171	0.0127415	0.0709102	0.916348	0.292587	0.776597	0.130978	0.477137	0.0167324	0.016751	0.436581	0.433101	0.771937	0.128952	0.0980871	0.728115	0.173798	0.240879	0.211748	0.450908	0.0964648	0.0283176	0.00982741	0.880416	0.0814388	0.184282	0.108278	0.627797
554	28354.7	0	3.65216	3.65084	-23789.5	4563.55	Standard of care	0.0258544	0.442501	28354.7	0.433482	58.3727	0.0372992	0.03125	0.158428	0.810322	0.205622	0.0107134	0.783665	0.0227272	0.0265221	0.950751	0.052239	0.0439278	0.903833	0.360621	0.79646	0.118906	0.466074	0.0546294	0.0546273	0.433547	0.443576	0.817961	0.117639	0.111999	0.747883	0.140118	0.231649	0.153633	0.436717	0.178	0.0123075	0.00557892	0.915679	0.066435	0.143567	0.0518054	0.755048
555	31229.2	0	4.34581	4.34888	-25796.9	5436.09	Standard of care	0.00702124	0.437041	31229.2	0.498585	60.6569	0.0363227	0.0218862	0.190546	0.787568	0.239661	0.019021	0.741318	0.0145474	0.0313709	0.954082	0.0594467	0.136631	0.803923	0.329984	0.757732	0.122734	0.476851	0.0651179	0.065181	0.498613	0.437386	0.86556	0.0698152	0.0833814	0.735768	0.180851	0.265018	0.192066	0.372169	0.170747	0.0379449	0.000189136	0.897203	0.0646628	0.116376	0.0523021	0.694344
556	31096.9	0	1.65919	1.66622	-29022.9	2082.77	Standard of care	0.0142825	0.457373	31096.9	0.508849	54.1812	0.0366178	0.031809	0.180363	0.787828	0.310267	0.0477307	0.642002	0.0149768	0.038414	0.946609	0.0202711	0.0844269	0.895302	0.375301	0.821354	0.121453	0.486484	0.0247642	0.0248912	0.508992	0.458003	0.771302	0.163653	0.063845	0.845004	0.0911513	0.20756	0.208069	0.456007	0.128364	0.036667	0.00145452	0.904595	0.0572834	0.174485	0.105373	0.588228
557	29867.3	0	1.1306	1.13001	-28454.1	1412.51	Standard of care	0.00709522	0.489177	29867.3	0.47858	59.5152	0.0100613	0.058749	0.136724	0.804527	0.250354	0.0478554	0.701791	0.0169068	0.0384354	0.944658	0.0132823	0.0739102	0.912808	0.412988	0.57701	0.130038	0.507211	0.016913	0.0169131	0.478658	0.48939	0.844422	0.0981095	0.0615455	0.793528	0.144926	0.292641	0.10613	0.448106	0.153124	0.0466754	0.000228522	0.929296	0.0238001	0.167074	0.0525032	0.719218
558	32081.7	0	1.03973	1.04175	-30782.1	1302.18	Standard of care	0.0119307	0.461567	32081.7	0.482235	57.1453	0.044142	0.0536398	0.191941	0.754419	0.255719	0.040204	0.704077	0.0162359	0.0094598	0.974304	0.0118787	0.0635978	0.924523	0.364548	0.650816	0.13679	0.509199	0.0154983	0.0155413	0.482344	0.46209	0.745901	0.160795	0.0856536	0.809131	0.105215	0.289998	0.10255	0.474655	0.132797	0.0469114	0.0117695	0.890557	0.0507619	0.0860113	0.124381	0.687399
559	29748.6	0	3.35115	3.35308	-25559.6	4191.35	Standard of care	0.0125183	0.445037	29748.6	0.472969	57.9409	0.0490036	0.035771	0.143821	0.820408	0.188083	0.0692091	0.742708	0.0212427	0.0234818	0.955275	0.0444793	0.130823	0.824698	0.39083	0.625341	0.123329	0.491385	0.0501521	0.0502088	0.473166	0.445482	0.802359	0.0996869	0.0879719	0.775478	0.13655	0.311356	0.19448	0.387006	0.107158	0.0489661	0.00122075	0.904831	0.0449817	0.162427	0.0614048	0.719293
560	31124.8	0	0.942454	0.94881	-29946.7	1186.01	Standard of care	0.00777252	0.445033	31124.8	0.535937	59.7267	0.014502	0.061465	0.163633	0.774901	0.293995	0.0807373	0.625267	0.00872337	0.0069347	0.984342	0.0107028	0.0658571	0.92344	0.338435	0.750708	0.129982	0.466791	0.0140767	0.0141804	0.536055	0.445361	0.774407	0.204795	0.0556388	0.824749	0.119612	0.237477	0.19076	0.436043	0.13572	0.0385138	0.00397529	0.920394	0.037117	0.14806	0.0778461	0.696521
561	29656.4	0	2.1944	2.19738	-26913.4	2746.72	Standard of care	0.00790661	0.458393	29656.4	0.518318	53.8679	0.0471797	0.0572341	0.19586	0.746906	0.224864	0.0159588	0.759177	0.0405816	0.00687212	0.952546	0.0294885	0.0698282	0.900683	0.326149	0.654857	0.142229	0.510845	0.0328524	0.0329069	0.518345	0.458745	0.808025	0.112767	0.0594893	0.813885	0.126626	0.246704	0.154766	0.506656	0.091874	0.0568632	0.00144752	0.884707	0.056982	0.179501	0.114477	0.618287
562	29812.6	0	2.19648	2.20008	-27067	2750.1	Standard of care	0.00844249	0.409514	29812.6	0.469819	57.7179	0.0494985	0.038928	0.11434	0.846732	0.259377	0.028539	0.712084	0.0351967	0.0687396	0.896064	0.0285237	0.0930809	0.878395	0.367814	0.729563	0.144214	0.480786	0.0328804	0.0329482	0.469871	0.409768	0.763173	0.174252	0.101418	0.812424	0.0861581	0.262615	0.10348	0.562532	0.0713726	0.0606582	0.0010309	0.916043	0.0222676	0.18966	0.0589177	0.65687
563	30176.6	0	2.31157	2.31323	-27287.2	2891.54	Standard of care	0.00523706	0.461053	30176.6	0.501294	56.6272	0.0110172	0.022793	0.139461	0.837746	0.259648	0.0587291	0.681623	0.022278	0.038628	0.939094	0.0312414	0.0767285	0.89203	0.305168	0.425858	0.133222	0.496357	0.0346419	0.034674	0.50136	0.461225	0.748485	0.125167	0.0462	0.830701	0.123099	0.191578	0.206728	0.476665	0.125029	0.0208903	0.000505699	0.943371	0.0352329	0.19858	0.122929	0.63129
564	27736	0	4.33078	4.33095	-22322.5	5413.69	Standard of care	0.00605783	0.46057	27736	0.470692	56.6478	0.0539336	0.0463937	0.197827	0.75578	0.154349	0.0301027	0.815549	0.0624136	0.0175222	0.920064	0.0619656	0.0698961	0.868138	0.308814	0.705107	0.129459	0.464378	0.0649126	0.064922	0.470731	0.460872	0.796856	0.124677	0.067171	0.825555	0.107274	0.200358	0.160524	0.569879	0.069239	0.0392707	0.000441703	0.942778	0.0175099	0.0857586	0.0684212	0.71527
565	29247.6	0	2.00217	2.00096	-26744.8	2501.2	Standard of care	0.00832905	0.475159	29247.6	0.455739	58.2656	0.0548529	0.0890992	0.17966	0.731241	0.253609	0.0419027	0.704489	0.0161267	0.00397521	0.979898	0.0253004	0.0954941	0.879205	0.291165	0.756021	0.125755	0.469201	0.0299517	0.0299463	0.455817	0.475524	0.763167	0.168567	0.0573806	0.812272	0.130347	0.246433	0.121454	0.512122	0.11999	0.0189144	0.000427895	0.958592	0.0220657	0.134612	0.0699412	0.70768
566	31776.6	0	2.61932	2.62369	-28502.5	3279.62	Standard of care	0.00886451	0.391456	31776.6	0.444313	59.3795	0.0321271	0.0293834	0.229552	0.741064	0.330356	0.0365663	0.633078	0.0449405	0.0413932	0.913666	0.0331814	0.129365	0.837453	0.3872	0.525245	0.133063	0.494189	0.0391922	0.0392752	0.44439	0.391999	0.793123	0.123814	0.0588286	0.696962	0.244209	0.264797	0.217969	0.379735	0.1375	0.0386319	0.0116793	0.926457	0.0232313	0.109574	0.0657309	0.753133
567	28297.1	0	3.55429	3.55519	-23854.3	4443.99	Standard of care	0.0132264	0.424844	28297.1	0.434621	61.8123	0.0370141	0.0532418	0.234045	0.712713	0.225575	0.0350704	0.739354	0.0194099	0.038592	0.941998	0.0479833	0.112027	0.839989	0.308322	0.743132	0.146754	0.510646	0.0531795	0.053215	0.434735	0.425587	0.730068	0.1383	0.100415	0.770547	0.129037	0.217885	0.180558	0.502222	0.0993337	0.0202531	3.11075e-05	0.929183	0.0505332	0.197809	0.0986332	0.651909
568	29255.8	0	2.65215	2.66063	-25940.6	3325.78	Standard of care	0.0180381	0.422237	29255.8	0.493914	57.6032	0.0100482	0.0540531	0.12902	0.816927	0.274145	0.0150695	0.710785	0.0599337	0.0324948	0.907571	0.0366704	0.0430592	0.92027	0.404549	0.829789	0.130761	0.462233	0.0396906	0.0398318	0.493969	0.422866	0.815452	0.143691	0.120678	0.722224	0.157098	0.187004	0.204801	0.500015	0.10818	0.0350994	0.00573101	0.901861	0.0573084	0.162673	0.0570302	0.721471
569	29370.8	0	1.43765	1.4356	-27573.7	1794.5	Standard of care	0.00967512	0.454814	29370.8	0.427799	57.7507	0.00679779	0.0573826	0.138561	0.804056	0.258537	0.0407753	0.700688	0.0284265	0.0404389	0.931135	0.0166145	0.0975898	0.885796	0.346827	0.322208	0.125008	0.512936	0.0215022	0.0214859	0.427901	0.455126	0.824255	0.108269	0.0928307	0.804034	0.103135	0.311379	0.114175	0.520512	0.0539339	0.0203062	0.00373267	0.937556	0.0384049	0.150995	0.0709128	0.680263
570	31431.5	0	1.41573	1.41602	-29661.8	1770.02	Standard of care	0.0166278	0.442152	31431.5	0.444875	58.8199	0.0384028	0.0418381	0.148889	0.809273	0.263235	0.0408822	0.695883	0.0385296	0.0133855	0.948085	0.0172564	0.0636257	0.919118	0.335688	0.740485	0.137339	0.424979	0.021116	0.0211371	0.445013	0.442837	0.767014	0.0867637	0.100277	0.760176	0.139548	0.279926	0.221825	0.413097	0.0851518	0.0558106	0.0117616	0.886914	0.0455139	0.18432	0.0724823	0.704599
571	32584.1	0	3.01032	3.01433	-28821.2	3767.92	Standard of care	0.0145303	0.452705	32584.1	0.489712	57.7287	0.0150909	0.0925192	0.215262	0.692219	0.267754	0.0186309	0.713615	0.0288147	0.0174979	0.953687	0.0412408	0.0652262	0.893533	0.309905	0.470919	0.117035	0.47001	0.0450414	0.0451171	0.48977	0.453506	0.809742	0.110147	0.0883066	0.822049	0.0896445	0.265115	0.179209	0.461961	0.093715	0.0407544	0.000342359	0.939366	0.0195374	0.143323	0.123351	0.635819
572	29999.2	0	1.7374	1.73955	-27827.5	2174.44	Standard of care	0.0121412	0.460916	29999.2	0.490859	57.1123	0.0516498	0.0376036	0.134872	0.827525	0.193708	0.0141144	0.792178	0.0225985	0.0150794	0.962322	0.0237324	0.0401748	0.936093	0.38454	0.333114	0.138274	0.520811	0.0259972	0.0260384	0.490898	0.461281	0.816219	0.13203	0.0982805	0.74967	0.152049	0.228359	0.197121	0.452246	0.122275	0.0288678	0.00153109	0.949148	0.0204531	0.159045	0.0249656	0.714627
573	29243.9	0	1.2264	1.22499	-27710.9	1531.24	Standard of care	0.012639	0.478415	29243.9	0.463688	62.943	0.0565938	0.0284831	0.177841	0.793676	0.242627	0.0412169	0.716156	0.0142498	0.0145134	0.971237	0.0133674	0.0990906	0.887542	0.413145	0.768412	0.131099	0.495194	0.0182752	0.0182752	0.463808	0.478929	0.829231	0.0605458	0.0831501	0.763084	0.153766	0.284685	0.148375	0.45627	0.11067	0.0578202	0.00182245	0.911075	0.0292828	0.138692	0.12503	0.67278
574	31366	0	1.26758	1.2679	-29781.6	1584.87	Standard of care	0.00683331	0.42421	31366	0.430567	57.5783	0.0415489	0.0309719	0.138579	0.830449	0.276814	0.0255291	0.697657	0.0068033	0.0120708	0.981126	0.0153937	0.0757592	0.908847	0.34684	0.610669	0.114011	0.410133	0.0189605	0.0189734	0.430603	0.424495	0.795708	0.14488	0.142445	0.764337	0.0932181	0.173116	0.178591	0.475239	0.173054	0.0658162	0.00283963	0.879888	0.0514561	0.13986	0.069639	0.721329
575	29823.3	0	4.11614	4.12026	-24678.1	5150.33	Standard of care	0.0100227	0.396902	29823.3	0.461099	57.3059	0.0303742	0.0478124	0.181404	0.770783	0.220591	0.024299	0.75511	0.0201914	0.0186126	0.961196	0.0585269	0.0702272	0.871246	0.403967	0.493889	0.131247	0.480143	0.0616743	0.0617475	0.461154	0.397398	0.869604	0.0620952	0.0751183	0.79294	0.131942	0.263325	0.192623	0.468206	0.0758461	0.0354747	6.53488e-05	0.871915	0.0925449	0.155655	0.0808708	0.689501
576	32376.2	0	2.49076	2.48945	-29262.7	3111.81	Standard of care	0.00893742	0.486245	32376.2	0.461121	55.6426	0.0122716	0.0194272	0.204657	0.775916	0.20307	0.0153523	0.781577	0.0162531	0.00973985	0.974007	0.0354197	0.0394864	0.925094	0.303297	0.686955	0.130681	0.470068	0.0373024	0.0372885	0.461151	0.486678	0.851046	0.0948744	0.0472103	0.832673	0.120116	0.211546	0.127327	0.489529	0.171598	0.0220932	0.00179535	0.948348	0.0277631	0.120022	0.12673	0.688422
577	30808.3	0	3.53138	3.53073	-26394.1	4413.42	Standard of care	0.00799938	0.488775	30808.3	0.478156	60.0875	0.0148776	0.0914361	0.157116	0.751448	0.28805	0.03103	0.68092	0.0295263	0.0160663	0.954407	0.0494867	0.0696109	0.880902	0.337649	0.810225	0.127428	0.439792	0.052923	0.0529225	0.478206	0.489089	0.781083	0.107189	0.0954678	0.810745	0.093787	0.274362	0.142673	0.397538	0.185426	0.0291777	0.000386443	0.928644	0.0417916	0.125976	0.0652604	0.720844
578	30919.8	0	0.954112	0.954499	-29727.1	1193.12	Standard of care	0.00275488	0.419784	30919.8	0.441907	61.2877	0.0452325	0.101035	0.128592	0.770373	0.221954	0.0481733	0.729873	0.0307168	0.015461	0.953822	0.0095204	0.108757	0.881723	0.408673	0.571885	0.144517	0.494624	0.0142754	0.0142858	0.441939	0.419872	0.85486	0.10552	0.130957	0.745453	0.12359	0.307257	0.119767	0.45471	0.118267	0.0819155	0.00414669	0.874032	0.0399054	0.146783	0.0701476	0.740138
579	31057.1	0	2.23911	2.24152	-28258.2	2801.89	Standard of care	0.0123077	0.433418	31057.1	0.454999	60.1911	0.0422538	0.0505796	0.234265	0.715156	0.318999	0.0205763	0.660425	0.0245009	0.0129758	0.962523	0.0312609	0.0297994	0.93894	0.379725	0.766356	0.140104	0.461348	0.0334838	0.0335255	0.455054	0.434175	0.927699	0.0416062	0.0710132	0.860466	0.068521	0.302795	0.129249	0.43493	0.133026	0.0530029	0.00388651	0.92137	0.0217402	0.131304	0.115748	0.622535
580	28590.2	0	3.71077	3.71224	-23951.8	4640.3	Standard of care	0.00513443	0.410116	28590.2	0.453562	58.378	0.0488141	0.0365039	0.119212	0.844284	0.243518	0.0491724	0.70731	0.03443	0.00989464	0.955675	0.0522704	0.0774705	0.870259	0.352852	0.633354	0.131467	0.468472	0.0556284	0.0556568	0.453618	0.410283	0.794412	0.0799085	0.0559305	0.796061	0.148009	0.196498	0.162403	0.528597	0.112501	0.0574927	0.00052191	0.886911	0.055074	0.140185	0.0530761	0.736426
581	28353.6	0	2.51925	2.51795	-25204.5	3147.44	Standard of care	0.00922474	0.434535	28353.6	0.413795	57.284	0.0394508	0.0358419	0.137462	0.826696	0.231489	0.0214822	0.747028	0.0159338	0.0396626	0.944404	0.0334444	0.0927164	0.873839	0.38311	0.705765	0.127483	0.47807	0.0377226	0.0377158	0.413844	0.434861	0.796691	0.0993444	0.077493	0.748669	0.173838	0.293637	0.150968	0.483434	0.0719611	0.0606224	0.0168488	0.912914	0.00961494	0.169521	0.108279	0.666637
582	29266.3	0	2.21681	2.21296	-26495.3	2766.2	Standard of care	0.0119706	0.466813	29266.3	0.429006	53.6234	0.0530267	0.041729	0.164548	0.793723	0.304372	0.0361707	0.659457	0.0101418	0.0485997	0.941259	0.0302883	0.0495917	0.92012	0.365713	0.893152	0.118147	0.43608	0.033163	0.033114	0.429101	0.467335	0.885589	0.0765635	0.0709089	0.743856	0.185235	0.2323	0.105383	0.514546	0.147771	0.0311427	0.00425055	0.922597	0.0420096	0.195869	0.088394	0.654344
583	29468	0	4.86874	4.86906	-23382.1	6086.32	Standard of care	0.00679012	0.424244	29468	0.431509	60.5202	0.0156981	0.0298791	0.163058	0.807062	0.205105	0.0637866	0.731108	0.00347607	0.01838	0.978144	0.0692347	0.0915005	0.839265	0.380793	0.75946	0.142378	0.467432	0.072989	0.0730034	0.431608	0.424535	0.821262	0.0937378	0.0653318	0.826767	0.107901	0.319503	0.164741	0.361809	0.153947	0.0423915	0.0073249	0.908231	0.0420529	0.134265	0.108956	0.716344
584	28027.5	0	3.56664	3.57476	-23569.2	4468.45	Standard of care	0.0167642	0.398469	28027.5	0.463157	63.3825	0.0108456	0.0460194	0.213208	0.740772	0.264072	0.0261454	0.709783	0.0174225	0.0352525	0.947325	0.0488003	0.0933116	0.857888	0.302227	0.839351	0.142744	0.457996	0.0533502	0.053497	0.46325	0.399468	0.840921	0.0780546	0.0699983	0.7815	0.148501	0.212596	0.170195	0.433149	0.18406	0.0897998	0.00685993	0.887318	0.0160218	0.16896	0.0951937	0.654503
585	27886.1	0	0.852092	0.853076	-26821	1066.35	Standard of care	0.0118087	0.465404	27886.1	0.480843	59.9618	0.038307	0.0775929	0.142651	0.779756	0.24264	0.0304901	0.72687	0.0657748	0.00673654	0.927489	0.0099594	0.0372627	0.952778	0.338949	0.468684	0.127102	0.454806	0.0127099	0.0127319	0.480917	0.465832	0.799583	0.129298	0.0945661	0.739344	0.166089	0.311686	0.091898	0.476517	0.119899	0.0630548	0.0325999	0.86032	0.0440249	0.107447	0.0743248	0.710521
586	32555.4	0	1.59671	1.59563	-30559.5	1994.53	Standard of care	0.013714	0.475153	32555.4	0.463959	58.2211	0.0567503	0.0382383	0.160967	0.800795	0.237159	0.0109326	0.751908	0.0180545	0.0138771	0.968068	0.0205361	0.0596233	0.919841	0.386413	0.588868	0.118697	0.484536	0.0238561	0.0238535	0.463994	0.475679	0.770029	0.12606	0.0576267	0.818938	0.123435	0.250671	0.147739	0.488839	0.112751	0.0873057	7.96926e-05	0.892673	0.0199412	0.101548	0.131524	0.671864
587	29421.9	0	0.872608	0.875554	-28331.1	1094.44	Standard of care	0.0112172	0.430531	29421.9	0.464696	57.3631	0.0303306	0.0592167	0.139782	0.801002	0.237745	0.0752048	0.68705	0.0201917	0.0126496	0.967159	0.00855145	0.0841099	0.907339	0.380937	0.520385	0.133411	0.52275	0.0130046	0.013064	0.464901	0.430901	0.861262	0.0500908	0.107854	0.776761	0.115385	0.265884	0.157457	0.472535	0.104123	0.0466114	0.000170133	0.880016	0.0732028	0.108403	0.0876042	0.68262
588	29846.3	0	1.13294	1.13558	-28430.1	1419.47	Standard of care	0.0111291	0.474017	29846.3	0.507225	57.1906	0.044966	0.0507463	0.158124	0.791129	0.254368	0.0574825	0.688149	0.0347377	0.0429114	0.922351	0.013057	0.0716561	0.915287	0.332408	0.551516	0.142398	0.486468	0.0168997	0.0169532	0.507357	0.474424	0.820861	0.106204	0.0927105	0.809232	0.0980575	0.238006	0.172478	0.477845	0.111672	0.0427575	0.00244103	0.939222	0.0155797	0.182873	0.0766305	0.660175
589	32629.4	0	4.20026	4.19847	-27379.1	5248.09	Standard of care	0.013815	0.459568	32629.4	0.44164	59.1797	0.0323291	0.02911	0.161628	0.809262	0.263022	0.0491047	0.687874	0.0269065	0.0145045	0.958589	0.0611539	0.0341318	0.904714	0.405226	0.785841	0.128003	0.455087	0.0629219	0.0629028	0.44179	0.460141	0.827162	0.113346	0.0805361	0.7602	0.159264	0.289941	0.157891	0.456293	0.0958752	0.0648937	0.00575475	0.888447	0.0409048	0.125126	0.0837087	0.722307
590	29345.6	0	2.28741	2.29928	-26486.4	2874.1	Standard of care	0.0153675	0.461825	29345.6	0.549721	57.4667	0.0248938	0.071389	0.120145	0.808466	0.330462	0.0384502	0.631088	0.0288356	0.00937672	0.961788	0.0291126	0.0940274	0.87686	0.342646	0.745728	0.138044	0.436224	0.0342097	0.0344152	0.549821	0.462308	0.839389	0.10926	0.127782	0.738023	0.134194	0.344571	0.0638902	0.474553	0.116986	0.0239345	0.00568436	0.907618	0.0627632	0.189556	0.0475882	0.695965
591	31151.6	0	1.96576	1.96471	-28694.4	2455.89	Standard of care	0.0102681	0.454121	31151.6	0.439733	56.5621	0.0492767	0.0140145	0.216766	0.769219	0.253995	0.0209329	0.725072	0.0181794	0.00826571	0.973555	0.0262484	0.0645628	0.909189	0.404973	0.403326	0.122922	0.452317	0.0293936	0.0293882	0.439781	0.454705	0.804469	0.113318	0.0596408	0.812094	0.128265	0.279488	0.120578	0.497672	0.102262	0.0213018	4.55366e-05	0.949566	0.0290869	0.216977	0.0976722	0.603816
592	31190.1	0	2.40475	2.40375	-28184.1	3004.69	Standard of care	0.00730816	0.460807	31190.1	0.442556	56.3318	0.0262248	0.0560839	0.168747	0.77517	0.269643	0.019921	0.710436	0.0346527	0.0267563	0.938591	0.0336122	0.0455999	0.920788	0.37821	0.615832	0.128483	0.481374	0.0360273	0.0360174	0.44259	0.461107	0.817423	0.0812678	0.0972052	0.753683	0.149112	0.226384	0.198768	0.455752	0.119096	0.0362508	3.08663e-05	0.921512	0.0422067	0.147484	0.116652	0.702573
593	28379.6	0	4.82264	4.82088	-22351.3	6026.1	Standard of care	0.0077559	0.491289	28379.6	0.450829	56.9299	0.00761813	0.015491	0.12469	0.859819	0.182036	0.0425316	0.775433	0.0194512	0.0190495	0.961499	0.0690858	0.0799281	0.850986	0.397818	0.875994	0.118426	0.516533	0.0723096	0.0722938	0.450911	0.491498	0.835103	0.111071	0.0564037	0.852251	0.0913456	0.260089	0.150387	0.480577	0.108947	0.0294744	0.00419891	0.934282	0.0320448	0.107215	0.0458555	0.800155
594	31979.1	0	2.20405	2.20578	-29224.1	2757.23	Standard of care	0.0114453	0.436575	31979.1	0.462949	61.2863	0.0318853	0.0569988	0.127007	0.815994	0.205082	0.0789838	0.715934	0.0327166	0.0243119	0.942972	0.0280291	0.103619	0.868352	0.371204	0.943337	0.141419	0.492468	0.0329713	0.0330166	0.463155	0.436932	0.853386	0.0825525	0.0807367	0.754652	0.164611	0.285229	0.108219	0.518341	0.0882103	0.0921498	0.0186092	0.868668	0.020573	0.132906	0.0776377	0.698076
595	30214.9	0	1.36526	1.3646	-28508.4	1705.75	Standard of care	0.0120302	0.436526	30214.9	0.427099	59.8405	0.0234815	0.0192997	0.125501	0.855199	0.212099	0.0269661	0.760935	0.0230804	0.0198729	0.957047	0.016291	0.0846124	0.899097	0.360571	0.717318	0.126817	0.462759	0.0204028	0.020409	0.427175	0.436925	0.803704	0.0546531	0.0952993	0.758945	0.145756	0.336418	0.175178	0.406871	0.0815332	0.0655557	0.0038455	0.872286	0.058313	0.186029	0.128219	0.546155
596	30448.8	0	2.76302	2.76479	-26995.1	3455.99	Standard of care	0.00827563	0.40093	30448.8	0.430315	58.6267	0.0347131	0.0807775	0.159306	0.759917	0.233647	0.0278417	0.738511	0.0176258	0.0138366	0.968538	0.0374459	0.0816072	0.880947	0.368354	0.391191	0.115095	0.506686	0.0413892	0.0414261	0.430373	0.401275	0.838667	0.049922	0.11297	0.76025	0.12678	0.18965	0.143653	0.532859	0.133837	0.0613009	7.27088e-05	0.886264	0.0523624	0.144663	0.074773	0.708809
597	28769.3	0	2.36717	2.36826	-25810.3	2960.32	Standard of care	0.00804731	0.42856	28769.3	0.44455	58.8972	0.0554217	0.0572263	0.121022	0.821751	0.275828	0.045535	0.678637	0.0181405	0.0283517	0.953508	0.0308427	0.0973244	0.871833	0.400123	0.674017	0.136103	0.491265	0.0354415	0.0354704	0.444636	0.428805	0.833162	0.0948632	0.0661017	0.80309	0.130808	0.238127	0.0915451	0.551163	0.119165	0.022569	0.00243541	0.908951	0.0660451	0.120337	0.0585479	0.743493
598	29079.2	0	2.09481	2.10274	-26460.7	2628.42	Standard of care	0.0105924	0.435816	29079.2	0.530246	54.243	0.0535546	0.0664309	0.120938	0.812631	0.248458	0.0441036	0.707438	0.0276963	0.00443316	0.967871	0.027927	0.0651464	0.906927	0.390819	0.757762	0.126514	0.533894	0.0313588	0.0314898	0.530349	0.43611	0.823202	0.0825279	0.057436	0.783934	0.15863	0.241205	0.150195	0.543107	0.0654927	0.0397808	0.00653344	0.90177	0.0519152	0.103604	0.0565961	0.759664
599	28451.5	0	4.63847	4.63844	-22653.4	5798.06	Standard of care	0.0158707	0.459297	28451.5	0.45911	59.5266	0.0353247	0.0715095	0.191416	0.737075	0.321683	0.0385953	0.639722	0.0235565	0.0235161	0.952927	0.0640938	0.107223	0.828683	0.376852	0.665154	0.139467	0.482205	0.0694413	0.0694678	0.459247	0.460029	0.759905	0.150893	0.103523	0.810931	0.0855466	0.304246	0.176366	0.390778	0.12861	0.0401694	0.00218927	0.920844	0.0367971	0.0842436	0.0730775	0.751499
600	31100.7	0	0.605461	0.611235	-30343.9	764.044	Standard of care	0.0147099	0.404582	31100.7	0.461675	60.9346	0.0446728	0.0448692	0.151415	0.803716	0.236422	0.05223	0.711348	0.0223043	0.0418577	0.935838	0.00577452	0.0481894	0.946036	0.398779	0.748602	0.136311	0.481243	0.00897274	0.00907076	0.461847	0.405176	0.839968	0.100269	0.0941853	0.785374	0.12044	0.179311	0.108815	0.532283	0.179591	0.0373585	0.00626173	0.914517	0.0418632	0.191219	0.0406612	0.665649
601	28471.4	0	1.70846	1.70905	-26335.8	2136.31	Standard of care	0.00733463	0.423251	28471.4	0.437855	60.2027	0.00624719	0.0576921	0.0877114	0.854596	0.196687	0.0325867	0.770727	0.0259932	0.0524037	0.921603	0.0195427	0.135373	0.845084	0.41304	0.505005	0.142843	0.491048	0.0255849	0.0256096	0.437911	0.423412	0.855844	0.0811601	0.146394	0.715452	0.138154	0.227993	0.220979	0.408464	0.142564	0.0509485	0.000810788	0.914389	0.0338522	0.1547	0.0235642	0.710709
602	31413	0	1.24229	1.24346	-29860.2	1554.33	Standard of care	0.0106615	0.446811	31413	0.463173	57.4781	0.0170351	0.0356389	0.19546	0.768901	0.234716	0.0578209	0.707463	0.0431458	0.0105791	0.946275	0.0155092	0.0543223	0.930169	0.303095	0.693721	0.143059	0.518105	0.0185533	0.01858	0.46332	0.447287	0.819393	0.149016	0.0502305	0.807837	0.141932	0.279286	0.153418	0.418047	0.149248	0.0294219	0.000233925	0.897934	0.0724107	0.131674	0.0572213	0.766264
603	31213.6	0	0.784761	0.792825	-30232.6	991.032	Standard of care	0.0111988	0.405467	31213.6	0.484852	55.6989	0.0484039	0.0499376	0.15052	0.799542	0.279691	0.0410512	0.679258	0.0153755	0.00800399	0.976621	0.00669161	0.0960969	0.897212	0.361915	0.758397	0.13742	0.513054	0.0116777	0.0118169	0.484956	0.405888	0.878544	0.0706507	0.0736232	0.783204	0.143172	0.327731	0.108115	0.460132	0.104022	0.0586147	0.00115045	0.861166	0.0790691	0.159031	0.0550285	0.710806
604	32468.1	0	1.01707	1.00533	-31196.8	1256.67	Standard of care	0.0197521	0.48174	32468.1	0.405319	60.0429	0.0377152	0.0505036	0.103565	0.845931	0.272528	0.0689222	0.65855	0.0193537	0.00527929	0.975367	0.00924869	0.0980613	0.89269	0.401805	0.546418	0.140722	0.45549	0.0151235	0.0149792	0.405636	0.482236	0.846951	0.0865181	0.0752649	0.753699	0.171037	0.230544	0.173567	0.473109	0.12278	0.0374308	0.00535629	0.932425	0.0247881	0.0807516	0.0575595	0.829518
605	30086.2	0	3.2767	3.27897	-25990.4	4098.72	Standard of care	0.00910683	0.429285	30086.2	0.462526	57.8389	0.0128107	0.0340755	0.17068	0.795244	0.247565	0.0425771	0.709858	0.0267324	0.00498203	0.968286	0.0452843	0.0832132	0.871502	0.357274	0.614106	0.131035	0.505497	0.0490928	0.0491392	0.462618	0.429666	0.831241	0.109348	0.0710726	0.787157	0.141771	0.296583	0.167225	0.364553	0.17164	0.0359567	0.00371086	0.881821	0.0785113	0.214452	0.0477627	0.696382
606	32324.6	0	1.29434	1.29552	-30706.7	1619.4	Standard of care	0.0113875	0.454314	32324.6	0.474669	60.5148	0.0222428	0.0384962	0.176134	0.78537	0.250215	0.0294786	0.720307	0.0580657	0.00320466	0.93873	0.0133248	0.126332	0.860343	0.400589	0.849073	0.143487	0.395139	0.0193055	0.0193467	0.474728	0.454881	0.803356	0.103508	0.0737736	0.806035	0.120191	0.223793	0.132808	0.486412	0.156986	0.0589718	0.00148512	0.913085	0.0264585	0.133453	0.0655417	0.691852
607	32610	0	0.598371	0.59364	-31862.1	742.05	Standard of care	0.0126317	0.462966	32610	0.416565	59.6338	0.0313605	0.0144541	0.151826	0.83372	0.274883	0.0304216	0.694696	0.0191141	0.0201161	0.96077	0.00464971	0.0781068	0.917244	0.30069	0.463332	0.141956	0.473835	0.00888144	0.00882569	0.416656	0.463431	0.857742	0.0960985	0.0901518	0.786122	0.123726	0.267861	0.112046	0.470469	0.149625	0.0546295	0.00371014	0.906714	0.034946	0.137801	0.0868844	0.681301
608	33018.3	0	2.28298	2.28315	-30164.6	2853.94	Standard of care	0.0117264	0.420448	33018.3	0.422728	58.4654	0.0498352	0.0295127	0.233675	0.736812	0.218753	0.068132	0.713115	0.0139001	0.0132815	0.972818	0.0283503	0.126966	0.844683	0.293549	0.466714	0.133979	0.46327	0.0341011	0.0341255	0.422913	0.421187	0.859291	0.0617644	0.0431059	0.801977	0.154918	0.311685	0.119535	0.456531	0.112249	0.0487778	0.024672	0.903281	0.0232693	0.137264	0.0602946	0.710506
609	30365.6	0	0.525531	0.52834	-29708.7	660.425	Standard of care	0.00938471	0.438543	30365.6	0.479751	55.6428	0.044848	0.0467086	0.199338	0.753954	0.278463	0.0577815	0.663755	0.0394402	0.0164816	0.944078	0.00400907	0.0705614	0.925429	0.392533	0.690853	0.139705	0.452426	0.00778965	0.00784231	0.47986	0.439038	0.809994	0.106563	0.117891	0.776307	0.105802	0.179692	0.213562	0.51698	0.0897659	0.0289808	0.00346214	0.912039	0.0555184	0.0875158	0.0464095	0.758885
610	32136.7	0	1.15055	1.15665	-30698.5	1445.82	Standard of care	0.0177625	0.446087	32136.7	0.485494	60.984	0.030317	0.0135818	0.133957	0.852461	0.323778	0.0275227	0.6487	0.0478838	0.00684682	0.945269	0.012461	0.0782236	0.909315	0.29379	0.824448	0.123664	0.473769	0.0171435	0.0172595	0.485599	0.446695	0.775705	0.110822	0.07326	0.841428	0.0853125	0.279063	0.116857	0.495409	0.108671	0.0777157	0.00306853	0.835532	0.0836842	0.125848	0.043742	0.752282
611	31960.1	0	1.7134	1.71649	-29818.3	2145.61	Standard of care	0.0119107	0.409994	31960.1	0.460352	55.4665	0.0190173	0.0754504	0.230794	0.693755	0.184999	0.0249515	0.79005	0.0153269	0.0127176	0.971956	0.0187883	0.145728	0.835484	0.386024	0.785562	0.126425	0.456026	0.0255743	0.0256473	0.460416	0.410764	0.809583	0.125772	0.068982	0.822872	0.108146	0.209974	0.176467	0.522359	0.091199	0.0621165	0.00908929	0.879374	0.0494199	0.115941	0.0687957	0.717229
612	27843.7	0	2.01241	2.01206	-25328.2	2515.08	Standard of care	0.0151735	0.450082	27843.7	0.446722	61.7763	0.0400888	0.0184101	0.102422	0.879168	0.248778	0.0378694	0.713352	0.0423175	0.0210898	0.936593	0.024949	0.103006	0.872045	0.329042	0.718034	0.12618	0.499348	0.030089	0.0301097	0.446861	0.450456	0.841408	0.0995519	0.0408919	0.826612	0.132497	0.265273	0.0970481	0.493062	0.144617	0.024759	0.0159004	0.911706	0.0476348	0.10742	0.0904399	0.685792
613	29488.9	0	2.73402	2.73348	-26071.4	3416.84	Standard of care	0.00648825	0.433013	29488.9	0.425637	59.3634	0.0271451	0.0870584	0.180453	0.732488	0.387022	0.0337234	0.579254	0.0163048	0.0175029	0.966192	0.0368664	0.0817074	0.881426	0.327469	0.70388	0.143068	0.463413	0.0409602	0.0409598	0.425687	0.433319	0.759519	0.149431	0.0912901	0.811102	0.0976076	0.302388	0.141986	0.393973	0.161653	0.0723828	0.0254215	0.871895	0.0303011	0.103415	0.074647	0.740759
614	29581.5	0	1.44333	1.43963	-27777.3	1799.53	Standard of care	0.0195083	0.437759	29581.5	0.412924	56.4868	0.0401065	0.0452059	0.136913	0.817881	0.292582	0.027397	0.680021	0.061755	0.0106897	0.927555	0.0154209	0.099413	0.885166	0.308907	0.737256	0.14427	0.497051	0.021517	0.0214903	0.413058	0.438405	0.837475	0.0867958	0.0666882	0.77711	0.156202	0.253041	0.162693	0.425535	0.158731	0.0500617	0.00375894	0.924088	0.0220916	0.123555	0.106285	0.681854
615	32158.1	0	3.27851	3.27693	-28060	4096.16	Standard of care	0.00708342	0.449104	32158.1	0.420416	61.6032	0.0327809	0.0590232	0.123345	0.817632	0.245988	0.0343578	0.719655	0.0107302	0.0148639	0.974406	0.0465658	0.0533753	0.900059	0.338099	0.68333	0.122677	0.493577	0.0491444	0.0491267	0.420477	0.449318	0.849005	0.0766302	0.125342	0.69979	0.174868	0.28287	0.154099	0.448827	0.114203	0.0162642	0.00127406	0.957758	0.0247034	0.133597	0.090371	0.701504
616	29918.7	0	2.56303	2.56605	-26714.9	3207.57	Standard of care	0.0131693	0.449199	29918.7	0.473654	55.4066	0.0172951	0.100172	0.140437	0.759391	0.310602	0.0391935	0.650204	0.0204939	0.0134284	0.966078	0.0345325	0.0615358	0.903932	0.355627	0.778024	0.127377	0.484323	0.0383706	0.0384293	0.473769	0.449658	0.798574	0.12226	0.0462231	0.789893	0.163884	0.259629	0.158375	0.486763	0.0952326	0.0342962	0.00344684	0.919405	0.0428522	0.11448	0.0827342	0.712786
617	30254.6	0	5.66424	5.66273	-23174.3	7078.41	Standard of care	0.0116889	0.480623	30254.6	0.463161	55.6578	0.0453599	0.0375093	0.127617	0.834874	0.307064	0.0228954	0.67004	0.0729207	0.0207506	0.906329	0.0802316	0.10447	0.815299	0.345215	0.860339	0.130886	0.478039	0.0848909	0.0848883	0.46322	0.480975	0.844784	0.0876231	0.0675201	0.811495	0.120985	0.325801	0.152977	0.431411	0.0898101	0.03548	0.00485325	0.930653	0.029014	0.151237	0.0671365	0.730242
618	29818.8	0	1.51093	1.52285	-27930.1	1903.56	Standard of care	0.010595	0.395458	29818.8	0.545861	60.0512	0.0145454	0.0561244	0.177252	0.766624	0.255729	0.0589686	0.685302	0.0188042	0.0162786	0.964917	0.019913	0.0475014	0.932586	0.388941	0.646311	0.133693	0.469169	0.0225862	0.0227728	0.545977	0.39598	0.855538	0.0904471	0.0481328	0.801264	0.150603	0.29474	0.148711	0.454633	0.101915	0.045149	0.00441383	0.943118	0.00731964	0.147912	0.0849543	0.679422
619	30563.2	0	3.45919	3.46617	-26239.2	4332.72	Standard of care	0.0206806	0.445955	30563.2	0.507939	58.1211	0.0110698	0.018266	0.155403	0.826331	0.214356	0.0464024	0.739241	0.0304732	0.0707517	0.898775	0.0482968	0.0762467	0.875457	0.334678	0.607273	0.136039	0.4497	0.0517302	0.051864	0.508122	0.446801	0.823817	0.0983887	0.124464	0.776745	0.0987904	0.197146	0.123384	0.516085	0.163385	0.0667244	0.000531003	0.896325	0.0364193	0.186941	0.117008	0.630622
620	30403.7	0	2.41807	2.41574	-27381.1	3019.67	Standard of care	0.0110585	0.448122	30403.7	0.427318	58.2335	0.0501316	0.0274968	0.197735	0.774768	0.333714	0.040147	0.626139	0.0234153	0.0133044	0.96328	0.0299096	0.130691	0.839399	0.337212	0.613173	0.132041	0.490088	0.0361537	0.0361408	0.427426	0.448657	0.880501	0.084611	0.118121	0.703856	0.178022	0.291074	0.139306	0.472221	0.097399	0.0554144	8.51049e-05	0.902756	0.0417445	0.104051	0.112159	0.746114
621	29020.6	0	1.28546	1.2907	-27413.8	1613.38	Standard of care	0.0191693	0.449603	29020.6	0.489704	59.9402	0.0388946	0.0394172	0.152561	0.808022	0.260893	0.0506974	0.688409	0.0347549	0.00764946	0.957596	0.0156626	0.051025	0.933312	0.305206	0.698842	0.14125	0.448198	0.0191475	0.0192425	0.489895	0.450366	0.795406	0.134988	0.110101	0.825794	0.064105	0.202648	0.175984	0.488566	0.132802	0.0422121	0.00838459	0.914015	0.0353881	0.121121	0.0469843	0.760992
622	29434.6	0	3.75371	3.76233	-24742.5	4702.91	Standard of care	0.014198	0.429286	29434.6	0.504898	59.6694	0.043045	0.0519083	0.101369	0.846723	0.269581	0.0316187	0.6988	0.029514	0.0166579	0.953828	0.0532915	0.05605	0.890658	0.347855	0.897276	0.139157	0.500705	0.0562406	0.0563842	0.504994	0.429639	0.802111	0.136017	0.138011	0.763626	0.0983636	0.277457	0.155922	0.437795	0.128826	0.0336925	0.0029566	0.905036	0.0583154	0.194979	0.0929108	0.620892
623	30021	0	3.44801	3.4522	-25711	4315.25	Standard of care	0.0205678	0.441641	30021	0.464547	59.0522	0.035628	0.0524364	0.256269	0.691294	0.274692	0.0409305	0.684378	0.0227341	0.00639051	0.970875	0.0456125	0.113814	0.840573	0.333738	0.42065	0.126339	0.526984	0.0515133	0.051613	0.464754	0.442857	0.812905	0.126114	0.105062	0.754107	0.140831	0.261421	0.146278	0.420862	0.171439	0.0484756	0.00372271	0.912494	0.035308	0.194221	0.0976072	0.661271
624	31067.9	0	2.56255	2.56675	-27864.7	3208.44	Standard of care	0.0102886	0.424533	31067.9	0.491441	54.5766	0.0296658	0.0535562	0.157757	0.788687	0.250548	0.0363354	0.713117	0.03829	0.00698769	0.954722	0.0339886	0.0921412	0.87387	0.356309	0.901859	0.134238	0.429679	0.0383592	0.0384381	0.491512	0.424994	0.78055	0.119124	0.0827565	0.763729	0.153515	0.259543	0.130886	0.465575	0.143996	0.066323	0.00429672	0.906573	0.022807	0.185165	0.105473	0.642392
625	28161.7	0	1.34132	1.34166	-26485.1	1677.08	Standard of care	0.0100886	0.475286	28161.7	0.478913	56.9515	0.020571	0.0329723	0.204782	0.762245	0.300435	0.0414528	0.658112	0.0274084	0.000936537	0.971655	0.0169362	0.0549534	0.92811	0.302291	0.863356	0.129169	0.508055	0.0200435	0.020058	0.479009	0.475751	0.800674	0.127406	0.0785492	0.799094	0.122357	0.232417	0.126687	0.506616	0.134281	0.035369	0.00230432	0.913518	0.0488083	0.129875	0.0720266	0.742577
626	31754.2	0	3.54083	3.54175	-27328.1	4427.19	Standard of care	0.0168626	0.458859	31754.2	0.466729	53.4893	0.0472856	0.0405684	0.184335	0.775097	0.288169	0.0234118	0.688419	0.0553278	0.0227999	0.921872	0.0493349	0.0673973	0.883268	0.379979	0.58241	0.138942	0.447902	0.0529821	0.0530142	0.46681	0.459659	0.808301	0.153432	0.0763231	0.800866	0.122811	0.365546	0.123809	0.441472	0.0691724	0.054317	0.00576827	0.897392	0.0425224	0.168863	0.0679144	0.715498
627	30864.2	0	2.61715	2.61715	-27592.8	3271.43	Standard of care	0.0102199	0.417553	30864.2	0.417532	59.6555	0.0502326	0.0486741	0.233915	0.717411	0.272278	0.0557842	0.671938	0.0174392	0.0288526	0.953708	0.0352723	0.0782643	0.886463	0.360691	0.862167	0.124781	0.45227	0.0391481	0.0391594	0.417664	0.418221	0.814379	0.126	0.0642186	0.809296	0.126486	0.248718	0.205972	0.447164	0.0981461	0.0281196	0.00747173	0.929512	0.034897	0.10966	0.035547	0.784708
628	30956.2	0	1.43561	1.43728	-29161.7	1796.6	Standard of care	0.0179862	0.439473	30956.2	0.455607	59.2727	0.0300268	0.0267153	0.227999	0.745285	0.185782	0.053346	0.760872	0.0157898	0.00258093	0.981629	0.018066	0.0592578	0.922676	0.328736	0.761186	0.143457	0.500741	0.021374	0.0214159	0.455831	0.440456	0.837729	0.10367	0.057606	0.765323	0.177071	0.247806	0.167536	0.422416	0.162242	0.0625558	7.93518e-06	0.906	0.0314366	0.172034	0.0448192	0.716187
629	29688.4	0	4.5583	4.56104	-23990.5	5701.3	Standard of care	0.0126505	0.454436	29688.4	0.482384	59.2026	0.0263647	0.0541586	0.180744	0.765098	0.278598	0.022764	0.698638	0.0158542	0.0114998	0.972646	0.0647069	0.0775725	0.857721	0.393959	0.704298	0.134269	0.442636	0.0682837	0.0683413	0.482441	0.455038	0.854537	0.0665049	0.0407412	0.865295	0.0939637	0.182014	0.156949	0.575235	0.0858021	0.0689629	0.000698965	0.89701	0.0333278	0.154889	0.0540248	0.73721
630	29577.6	0	2.12149	2.12269	-26925.7	2653.36	Standard of care	0.00696668	0.4463	29577.6	0.481543	61.3659	0.0450983	0.0199803	0.197852	0.782168	0.164991	0.022898	0.812111	0.0110479	0.0455532	0.943399	0.0292507	0.0571327	0.913617	0.402364	0.75061	0.147112	0.481075	0.0317615	0.0317864	0.481577	0.446638	0.81709	0.124142	0.0897004	0.755436	0.154864	0.174061	0.142369	0.579517	0.104053	0.0351673	0.00175398	0.927526	0.0355532	0.210236	0.0747389	0.635713
631	28339.1	0	0.677183	0.67388	-27492.7	842.35	Standard of care	0.0104398	0.461415	28339.1	0.419973	56.8196	0.0162978	0.0411815	0.180013	0.778806	0.246793	0.0765217	0.676686	0.00883492	0.0159419	0.975223	0.00718307	0.0492413	0.943576	0.305376	0.580566	0.133775	0.474709	0.0100753	0.0100342	0.420164	0.461876	0.811309	0.0997707	0.0785641	0.804651	0.116785	0.199738	0.147555	0.508179	0.144528	0.113751	0.00625892	0.824112	0.0558786	0.147875	0.0475704	0.73817
632	29224.7	0	2.97442	2.97805	-25506.7	3722.56	Standard of care	0.00959946	0.452761	29224.7	0.500672	55.7422	0.0202087	0.0667588	0.212636	0.720605	0.247744	0.0785213	0.673735	0.00860785	0.0236168	0.967775	0.0414344	0.0629042	0.895661	0.390166	0.804167	0.1376	0.489182	0.0445353	0.0445994	0.500831	0.453253	0.821127	0.0977268	0.0655229	0.839132	0.0953451	0.280756	0.0907892	0.493004	0.135451	0.0532567	0.00381872	0.900332	0.0425923	0.0930297	0.0733558	0.761471
633	29550.3	0	2.97158	2.97717	-25835.8	3721.46	Standard of care	0.00672032	0.417747	29550.3	0.517308	55.0911	0.0515589	0.0378179	0.164462	0.797721	0.281761	0.0291498	0.689089	0.0223517	0.00474243	0.972906	0.040574	0.088245	0.871181	0.331299	0.580317	0.130204	0.48222	0.044517	0.0446115	0.517348	0.418037	0.844627	0.102543	0.067735	0.783852	0.148413	0.242308	0.107291	0.547287	0.103114	0.0180725	7.49408e-05	0.961811	0.0200412	0.218596	0.0599833	0.666734
634	31626.7	0	2.7278	2.72814	-28216.9	3410.18	Standard of care	0.00841419	0.428066	31626.7	0.432913	56.8468	0.0324698	0.0353669	0.173984	0.790649	0.285622	0.0633638	0.651014	0.0181405	0.0229722	0.958887	0.0383394	0.0493848	0.912276	0.37088	0.834021	0.125158	0.461988	0.0408568	0.0408682	0.433035	0.42846	0.789532	0.131955	0.0831745	0.766739	0.150087	0.363978	0.117065	0.410659	0.108298	0.0654772	9.45147e-05	0.854342	0.0800858	0.160766	0.0768172	0.679347
635	30040.1	0	1.49189	1.49505	-28175.3	1868.81	Standard of care	0.00936497	0.459767	30040.1	0.506939	56.6526	0.0154226	0.0357855	0.0932922	0.870922	0.251867	0.0256462	0.722487	0.0380138	0.0292434	0.932743	0.0183185	0.0818708	0.899811	0.394985	0.627285	0.117917	0.504416	0.022331	0.0223929	0.506991	0.459973	0.744142	0.175202	0.0736503	0.833533	0.0928167	0.192549	0.197256	0.487316	0.122879	0.0620346	0.00841078	0.882779	0.0467755	0.119876	0.0579061	0.710835
636	31813.3	0	2.69188	2.69065	-28448.5	3363.31	Standard of care	0.00704553	0.444694	31813.3	0.417956	59.8002	0.0423625	0.0213148	0.169061	0.809624	0.231703	0.0646037	0.703694	0.0149443	0.00684131	0.978214	0.037275	0.0680219	0.894703	0.344181	0.596856	0.133251	0.445858	0.0403211	0.0403102	0.418059	0.445012	0.849483	0.08251	0.0839187	0.79107	0.125011	0.275832	0.185932	0.425265	0.112971	0.0551667	0.012645	0.88052	0.0516684	0.159976	0.0926159	0.658168
637	31732.1	0	1.02911	1.02586	-30445.7	1282.32	Standard of care	0.00870003	0.450346	31732.1	0.409526	54.773	0.0410364	0.0172973	0.140332	0.84237	0.304435	0.0522376	0.643327	0.0321341	0.0605598	0.907306	0.0118437	0.0661798	0.921977	0.395194	0.586163	0.133549	0.506778	0.0153702	0.0153298	0.409644	0.450633	0.793921	0.143286	0.1667	0.77287	0.0604297	0.247516	0.164482	0.441452	0.14655	0.0514521	0.000826688	0.901809	0.0459125	0.120034	0.106779	0.726874
638	31673.9	0	2.40619	2.40791	-28666.2	3009.89	Standard of care	0.00526295	0.446076	31673.9	0.491446	55.8219	0.0529707	0.0782908	0.1386	0.783109	0.255379	0.022849	0.721772	0.0391004	0.0197126	0.941187	0.0291798	0.156558	0.814262	0.406187	0.648347	0.140804	0.503845	0.0360264	0.0360666	0.491472	0.446248	0.789221	0.121084	0.0844929	0.773924	0.141583	0.239139	0.131944	0.492598	0.13632	0.0212829	0.0197114	0.872418	0.0865877	0.124984	0.0925249	0.682378
639	30521.4	0	2.94956	2.9485	-26834.5	3685.62	Standard of care	0.0123999	0.451679	30521.4	0.438618	59.4103	0.007523	0.0337225	0.129956	0.836321	0.265844	0.0466965	0.68746	0.0726083	0.0245235	0.902868	0.0408204	0.0619059	0.897274	0.362783	0.428154	0.122307	0.504237	0.0441791	0.0441753	0.438762	0.452063	0.823362	0.102301	0.0522932	0.835425	0.112281	0.266152	0.189025	0.383775	0.161048	0.0741525	0.00849015	0.859481	0.0578767	0.211365	0.0683272	0.662282
640	31065.6	0	2.74068	2.74272	-27639.8	3428.4	Standard of care	0.00631301	0.468235	31065.6	0.503511	61.4412	0.00824557	0.0343525	0.111781	0.853867	0.304152	0.0419061	0.653942	0.0396778	0.0358466	0.924476	0.0385922	0.0506309	0.910777	0.307342	0.813054	0.132148	0.52047	0.0410846	0.041121	0.50357	0.468391	0.876484	0.0798239	0.136545	0.773435	0.09002	0.246712	0.163146	0.485006	0.105135	0.0486652	3.64088e-05	0.941197	0.0101016	0.172969	0.052409	0.693454
641	29023.9	0	2.2488	2.2517	-26212.9	2814.63	Standard of care	0.00786892	0.431227	29023.9	0.495752	58.7933	0.0413655	0.0571516	0.0773542	0.865494	0.215248	0.0541747	0.730578	0.0184597	0.006501	0.975039	0.0285775	0.114342	0.857081	0.409822	0.509264	0.117094	0.432252	0.0336765	0.0337362	0.495834	0.431401	0.777457	0.13997	0.0461233	0.782973	0.170904	0.366149	0.14654	0.351958	0.135353	0.0457431	0.00434611	0.905435	0.044476	0.110179	0.0714506	0.722834
642	30454	0	1.57396	1.57941	-28486.5	1974.27	Standard of care	0.0208281	0.425813	30454	0.46302	59.6339	0.0139121	0.0724318	0.159788	0.76778	0.237456	0.0286914	0.733853	0.0254669	0.0248504	0.949683	0.0184638	0.0783869	0.903149	0.392452	0.672372	0.131384	0.498855	0.0234671	0.0235754	0.463159	0.426644	0.882074	0.0789573	0.111015	0.720266	0.168719	0.204927	0.145672	0.540964	0.108438	0.0236424	0.00664199	0.931592	0.0381236	0.137351	0.0828606	0.748178
643	30257.3	0	4.15168	4.15333	-25067.7	5191.67	Standard of care	0.00779433	0.443725	30257.3	0.479282	63.9965	0.0250871	0.0259995	0.142079	0.831922	0.240096	0.0616048	0.698299	0.0441532	0.0231963	0.93265	0.0596966	0.0580799	0.882224	0.326225	0.752975	0.130168	0.450675	0.0622303	0.0622626	0.47938	0.444019	0.862937	0.0858309	0.079094	0.720837	0.200069	0.229805	0.136638	0.525357	0.108201	0.0804732	0.000680644	0.865527	0.0533192	0.188397	0.0530845	0.679653
644	30309.4	0	0.588025	0.59097	-29574.4	738.713	Standard of care	0.00876845	0.468667	30309.4	0.539883	60.0575	0.0146602	0.0696152	0.1329	0.797485	0.181324	0.0172337	0.801442	0.0230978	0.0329373	0.943965	0.00372344	0.106521	0.889755	0.323048	0.669598	0.14362	0.451952	0.0087529	0.00881521	0.53991	0.468958	0.85133	0.0754354	0.105729	0.784753	0.109518	0.16697	0.144729	0.590943	0.0973587	0.0273341	0.00341336	0.897093	0.0721596	0.224749	0.0375103	0.623888
645	30638.5	0	1.31156	1.31549	-28999.1	1644.36	Standard of care	0.00898904	0.44837	30638.5	0.50945	61.1021	0.0124818	0.0282698	0.220737	0.750994	0.231245	0.0135978	0.755157	0.0261728	0.00483161	0.968996	0.0163943	0.0646611	0.918945	0.313212	0.657022	0.117173	0.523529	0.0196054	0.0196747	0.509477	0.44883	0.80807	0.0859245	0.0605744	0.845603	0.0938225	0.285644	0.163886	0.416179	0.134291	0.0376629	0.000979859	0.929015	0.0323421	0.139966	0.0536788	0.748289
646	28513.7	0	3.99423	3.99716	-23520.9	4996.45	Standard of care	0.0126565	0.45557	28513.7	0.494099	59.7746	0.0561489	0.0379549	0.198091	0.763954	0.19978	0.0300862	0.770133	0.0168343	0.0185435	0.964622	0.0582705	0.0334807	0.908249	0.360534	0.851794	0.127435	0.491639	0.0598274	0.0598786	0.494182	0.456175	0.796208	0.0846387	0.0648665	0.74421	0.190924	0.380787	0.123137	0.344858	0.151218	0.0595863	0.0012501	0.896638	0.0425257	0.123661	0.0576464	0.672358
647	27816.9	0	1.7242	1.73655	-25661.7	2170.69	Standard of care	0.0206125	0.435309	27816.9	0.510546	61.6689	0.0299148	0.0427276	0.176506	0.780767	0.245861	0.0675424	0.686597	0.0179248	0.0505864	0.931489	0.0188015	0.133815	0.847383	0.345483	0.740263	0.130275	0.524627	0.0256594	0.0258935	0.510857	0.436158	0.812663	0.103348	0.0579489	0.869058	0.0729927	0.266532	0.144051	0.43122	0.158197	0.0446738	0.0468805	0.845437	0.0630083	0.0965621	0.0538378	0.746048
648	30945.2	0	4.50263	4.50396	-25316.9	5629.96	Standard of care	0.0152295	0.478673	30945.2	0.489292	54.6458	0.0316419	0.0482826	0.147181	0.804537	0.242625	0.0161262	0.741249	0.00930055	0.00582358	0.984876	0.0633859	0.0897115	0.846903	0.32337	0.692432	0.125763	0.52924	0.0674523	0.0674968	0.48935	0.479154	0.858115	0.0823157	0.104127	0.764489	0.131383	0.259392	0.109402	0.536191	0.0950152	0.0226354	0.0200984	0.931128	0.0261385	0.117029	0.108151	0.730946
649	29775.1	0	1.84864	1.85816	-27464.3	2322.7	Standard of care	0.0132255	0.455227	29775.1	0.537485	57.3229	0.0478039	0.0832729	0.186634	0.730093	0.273892	0.0221894	0.703918	0.0130917	0.00826236	0.978646	0.0205096	0.145362	0.834129	0.335548	0.654587	0.136503	0.504888	0.0275911	0.0277697	0.537544	0.455802	0.797738	0.125738	0.0772047	0.847112	0.0756836	0.257371	0.104519	0.561183	0.0769264	0.107683	0.00308196	0.86099	0.0282457	0.140921	0.0674552	0.650665
650	28415.3	0	2.05735	2.06209	-25843.6	2577.61	Standard of care	0.00751719	0.452303	28415.3	0.544664	54.137	0.0226514	0.0851226	0.155853	0.759025	0.276018	0.0400557	0.683926	0.0680862	0.0191025	0.912811	0.0278269	0.0555363	0.916637	0.307683	0.706621	0.134102	0.490684	0.0308133	0.0308918	0.544722	0.452585	0.775874	0.098685	0.0638198	0.81144	0.12474	0.23653	0.170712	0.432794	0.159965	0.0485868	0.0018713	0.876273	0.0732686	0.116527	0.0542902	0.69635
651	29455.2	0	1.93163	1.92681	-27040.7	2408.51	Standard of care	0.0155277	0.480248	29455.2	0.419301	54.773	0.0369519	0.0367674	0.193707	0.769525	0.197487	0.023579	0.778934	0.0408251	0.0146696	0.944505	0.0262894	0.0414743	0.932236	0.308219	0.534585	0.133954	0.486699	0.0288655	0.0288029	0.419391	0.480943	0.804576	0.113511	0.0901836	0.807761	0.102055	0.433636	0.10046	0.353114	0.112789	0.0273596	1.74926e-06	0.930292	0.0423467	0.199124	0.0765315	0.685022
652	27673.9	0	2.77434	2.7719	-24206	3464.87	Standard of care	0.00949299	0.458528	27673.9	0.427513	57.9208	0.0204147	0.0570463	0.201126	0.741828	0.283665	0.0245136	0.691821	0.00496531	0.0723786	0.922656	0.0370573	0.0935772	0.869366	0.348798	0.810806	0.132188	0.452233	0.0415304	0.0415062	0.427566	0.45902	0.861053	0.0645151	0.072751	0.813744	0.113505	0.215489	0.153347	0.466813	0.164351	0.0493463	0.00125752	0.901949	0.0474474	0.0961312	0.086015	0.64903
653	29492.6	0	1.79482	1.79551	-27249.1	2244.39	Standard of care	0.00854339	0.438054	29492.6	0.447872	57.4547	0.031766	0.0374078	0.206378	0.756215	0.278788	0.038554	0.682658	0.028477	0.0398241	0.931699	0.021197	0.121133	0.85767	0.371985	0.547102	0.116714	0.500896	0.0268346	0.0268611	0.447953	0.438491	0.786481	0.12769	0.0991352	0.759186	0.141679	0.2252	0.179007	0.476613	0.119181	0.0711477	0.00404654	0.887163	0.0376424	0.168432	0.0323762	0.660047
654	30452	0	1.3333	1.33522	-28785.4	1669.03	Standard of care	0.0131774	0.446284	30452	0.466056	56.2588	0.0550111	0.0224334	0.100845	0.876721	0.25547	0.0460495	0.69848	0.0313406	0.0257607	0.942899	0.0167853	0.0547288	0.928486	0.293708	0.409887	0.123768	0.49221	0.0199251	0.0199663	0.466196	0.446612	0.87442	0.0714886	0.0904613	0.784492	0.125046	0.256759	0.108406	0.522991	0.111844	0.0791259	0.00512517	0.852346	0.0634026	0.094926	0.0805954	0.725176
655	32456.2	0	0.94697	0.953518	-31272.5	1191.9	Standard of care	0.0119726	0.442816	32456.2	0.528489	56.2696	0.0307808	0.041231	0.108293	0.850476	0.248757	0.0369211	0.714322	0.0348507	0.0273967	0.937753	0.0116394	0.0402141	0.948146	0.317012	0.80419	0.131937	0.447274	0.0141408	0.0142481	0.52857	0.443163	0.902033	0.072831	0.0702318	0.783128	0.14664	0.273726	0.136956	0.466624	0.122695	0.0814369	0.00114701	0.859579	0.0578369	0.142114	0.068219	0.676231
656	30696.2	0	2.67092	2.66985	-27357.5	3337.31	Standard of care	0.00765461	0.477622	30696.2	0.459579	61.2511	0.0425304	0.0466094	0.0825518	0.870839	0.276792	0.020179	0.703029	0.0227794	0.0224771	0.954744	0.0354958	0.098846	0.865658	0.310166	0.767118	0.127739	0.46007	0.0400175	0.0400144	0.459613	0.477777	0.761838	0.151614	0.0337173	0.818436	0.147847	0.233817	0.130636	0.552703	0.0828448	0.049562	0.0273147	0.866087	0.0570367	0.124032	0.0726716	0.722005
657	29620.2	0	1.45243	1.45464	-27804.7	1818.3	Standard of care	0.0107166	0.447484	29620.2	0.476346	56.5416	0.00684299	0.0564674	0.143611	0.799922	0.266022	0.0187317	0.715246	0.0283912	0.0113757	0.960233	0.0182305	0.0641431	0.917626	0.395863	0.855562	0.127725	0.451303	0.021724	0.0217688	0.476387	0.447891	0.819285	0.120574	0.0999485	0.802062	0.0979897	0.208894	0.138921	0.517558	0.134628	0.0436792	0.00168704	0.908869	0.045765	0.161985	0.188351	0.616504
658	29469.6	0	1.69897	1.70684	-27345.9	2133.55	Standard of care	0.0123682	0.417403	29469.6	0.486775	57.6552	0.0113696	0.0581519	0.162611	0.779237	0.302836	0.0461458	0.651019	0.0398076	0.010172	0.95002	0.0212702	0.0717825	0.906947	0.315224	0.753861	0.129548	0.520638	0.0254036	0.0255362	0.486908	0.417892	0.815987	0.0994834	0.0673978	0.871717	0.0608856	0.256512	0.122484	0.461413	0.159591	0.0295367	0.00342218	0.917462	0.0495794	0.152333	0.0774426	0.697415
659	30082	0	0.599546	0.609635	-29332.6	762.043	Standard of care	0.0150251	0.445243	30082	0.519162	56.1682	0.0307291	0.0505005	0.146573	0.802926	0.268615	0.0572832	0.674102	0.0109636	0.00864238	0.980394	0.00546306	0.0513874	0.94315	0.362556	0.725315	0.127647	0.52393	0.00889701	0.00906143	0.519351	0.445751	0.774193	0.0720321	0.0524976	0.830976	0.116527	0.293298	0.160199	0.45006	0.0964429	0.0640861	0.0341419	0.878221	0.0235508	0.0652604	0.0807587	0.787794
660	31768.1	0	2.05054	2.05182	-29204.9	2564.77	Standard of care	0.0100014	0.440044	31768.1	0.459354	54.2878	0.0247229	0.0477008	0.160207	0.792092	0.218042	0.0415047	0.740453	0.0215	0.0257409	0.952759	0.0263528	0.0909609	0.882686	0.389068	0.578708	0.12939	0.506224	0.0306843	0.0307184	0.459453	0.44043	0.885248	0.0469331	0.0950644	0.814503	0.0904327	0.246345	0.151949	0.411387	0.190319	0.0696401	0.00472717	0.904051	0.0215813	0.139457	0.0745051	0.702963
661	28685.8	0	2.0439	2.04444	-26130.9	2555.55	Standard of care	0.00786884	0.456276	28685.8	0.466999	59.4859	0.0326236	0.0919637	0.108034	0.800003	0.252759	0.015454	0.731787	0.042266	0.0319245	0.925809	0.0272182	0.0651187	0.907663	0.293452	0.676672	0.139277	0.462633	0.0306157	0.0306323	0.467025	0.45649	0.832142	0.0866114	0.0818986	0.796386	0.121715	0.311268	0.147082	0.382558	0.159092	0.0510455	0.000434314	0.927855	0.0206655	0.155684	0.0976675	0.630532
662	28331.5	0	1.23414	1.23093	-26788.8	1538.67	Standard of care	0.0107352	0.476703	28331.5	0.436714	55.5676	0.030483	0.033595	0.231378	0.735027	0.253369	0.11653	0.6301	0.0109629	0.00688091	0.982156	0.0134897	0.101128	0.885382	0.300323	0.747114	0.133508	0.451992	0.0183865	0.0183561	0.43699	0.47732	0.801569	0.0646402	0.0488783	0.861698	0.0894232	0.140027	0.217208	0.497098	0.145667	0.0421797	0.00623015	0.923448	0.0281422	0.15083	0.0490057	0.661993
663	29768.3	0	1.85579	1.86101	-27448.6	2326.27	Standard of care	0.0214535	0.418903	29768.3	0.456115	55.3211	0.042107	0.05807	0.221748	0.720182	0.257145	0.0494771	0.693378	0.029335	0.0255149	0.94515	0.0238677	0.0530157	0.923117	0.380539	0.738181	0.116591	0.429219	0.0276374	0.0277327	0.456334	0.420297	0.823167	0.130764	0.0534213	0.85061	0.0959683	0.329018	0.156338	0.38627	0.128374	0.0636685	0.000781143	0.8998	0.0357502	0.11604	0.0978772	0.646746
664	31605.7	0	0.93594	0.936225	-30435.8	1170.28	Standard of care	0.00820446	0.469913	31605.7	0.47504	56.8759	0.043702	0.0604899	0.190155	0.749355	0.228791	0.0220426	0.749167	0.0164071	0.0330152	0.950578	0.00907804	0.102514	0.888408	0.339772	0.657457	0.141605	0.482976	0.0139544	0.0139726	0.475079	0.47028	0.781052	0.109978	0.0628909	0.795099	0.14201	0.227947	0.115869	0.479775	0.176409	0.0735174	0.000534422	0.891858	0.0340906	0.0871226	0.130484	0.700347
665	28722.9	0	2.06075	2.06023	-26147	2575.29	Standard of care	0.00847602	0.473087	28722.9	0.465135	58.2551	0.0558525	0.0450568	0.216871	0.738072	0.249484	0.0510066	0.699509	0.0118161	0.0397429	0.948441	0.0267428	0.0865826	0.886675	0.355357	0.812088	0.123822	0.481633	0.0308184	0.0308225	0.465233	0.473527	0.826969	0.0680827	0.0647718	0.823007	0.112222	0.308106	0.186533	0.427744	0.0776164	0.0520408	0.00489071	0.918954	0.0241143	0.145277	0.0722391	0.743804
666	32809	0	1.6117	1.61003	-30794.4	2012.54	Standard of care	0.0169013	0.444308	32809	0.423043	56.4571	0.0190774	0.0936009	0.149449	0.75695	0.167704	0.0298329	0.802463	0.0192948	0.0194202	0.961285	0.0210798	0.0412206	0.9377	0.311675	0.595289	0.120367	0.467111	0.0240768	0.0240622	0.423162	0.444966	0.825793	0.120362	0.0967748	0.748991	0.154234	0.323981	0.145789	0.471495	0.0587344	0.0841641	0.00039929	0.863201	0.0522352	0.138858	0.0824542	0.717749
667	28221.6	0	4.20958	4.2127	-22959.6	5265.87	Standard of care	0.0141607	0.404404	28221.6	0.448633	61.8138	0.0361096	0.0700291	0.150598	0.779373	0.182581	0.0280799	0.789339	0.0344695	0.0225908	0.94294	0.0592507	0.0815221	0.859227	0.325506	0.776955	0.121448	0.503855	0.063054	0.0631189	0.44873	0.404957	0.878265	0.0819983	0.0591818	0.809658	0.13116	0.265957	0.112292	0.526806	0.0949445	0.0580717	0.00066759	0.863309	0.0779518	0.132751	0.0942511	0.634775
668	28832.7	0	1.2789	1.27876	-27234.1	1598.45	Standard of care	0.0126878	0.403643	28832.7	0.401894	57.9756	0.0184734	0.0574772	0.163359	0.779164	0.21792	0.0719826	0.710097	0.0354098	0.0222077	0.942383	0.0137713	0.102831	0.883398	0.350667	0.880952	0.127291	0.508291	0.019081	0.0190975	0.402137	0.404174	0.787771	0.1383	0.105082	0.788784	0.106134	0.235262	0.165069	0.508657	0.091012	0.0401876	0.00477645	0.942451	0.0125853	0.146191	0.0584548	0.674386
669	29012.9	0	1.57812	1.57366	-27040.3	1967.08	Standard of care	0.0255477	0.445778	29012.9	0.420204	60.6228	0.0442867	0.0720323	0.191682	0.736286	0.243973	0.0208926	0.735135	0.0249179	0.0412485	0.933834	0.0173775	0.091476	0.891146	0.373384	0.706174	0.132975	0.472245	0.0234493	0.0234154	0.420331	0.44702	0.775495	0.155693	0.0594502	0.799107	0.141442	0.248486	0.203806	0.445551	0.102157	0.0146822	0.0184701	0.908956	0.0578919	0.133121	0.115769	0.653374
670	29860.9	0	2.6246	2.62522	-26580.1	3281.52	Standard of care	0.00704787	0.492122	29860.9	0.509083	53.9585	0.0573165	0.0793224	0.170828	0.749849	0.188677	0.0627058	0.748617	0.0362295	0.00379129	0.959979	0.0344245	0.108767	0.856809	0.363796	0.745125	0.135149	0.496733	0.0392956	0.0393183	0.509176	0.492389	0.817106	0.0667661	0.0941183	0.780068	0.125813	0.197162	0.151834	0.55041	0.100594	0.0850417	0.000532331	0.866639	0.0477867	0.168261	0.102989	0.66138
671	28823.7	0	1.89871	1.8997	-26450.3	2374.62	Standard of care	0.0132546	0.442782	28823.7	0.451785	60.6779	0.0574888	0.0742343	0.0947853	0.83098	0.266083	0.0185295	0.715387	0.0276846	0.0329436	0.939372	0.0242587	0.0713289	0.904412	0.387015	0.53705	0.114293	0.521483	0.0284084	0.0284388	0.451848	0.443079	0.795758	0.129248	0.0685591	0.834634	0.096807	0.254487	0.177166	0.447744	0.120603	0.032959	0.00789272	0.890697	0.0684511	0.189108	0.0997884	0.661294
672	33056.8	0	2.13967	2.14227	-30382.2	2677.84	Standard of care	0.0105327	0.462698	33056.8	0.497967	62.1597	0.0431831	0.0195975	0.187059	0.793344	0.231821	0.0650875	0.703091	0.0130239	0.0259308	0.961045	0.0285798	0.0733999	0.89802	0.293764	0.743377	0.128893	0.475922	0.0319992	0.0320516	0.49811	0.463181	0.859242	0.111068	0.0823717	0.738626	0.179003	0.277521	0.176714	0.414749	0.131015	0.0756494	0.0280121	0.829531	0.0668079	0.171763	0.116386	0.638737
673	31889.1	0	1.28626	1.28969	-30281.3	1612.12	Standard of care	0.00796381	0.430059	31889.1	0.485844	56.142	0.0520976	0.034114	0.197016	0.76887	0.275812	0.0346678	0.68952	0.0344919	0.0103873	0.955121	0.0145321	0.0990406	0.886427	0.377726	0.601419	0.143123	0.479133	0.0192087	0.0192734	0.485902	0.430458	0.794301	0.119448	0.0747386	0.787932	0.137329	0.246665	0.13514	0.467241	0.150954	0.0736011	0.00123586	0.82364	0.101523	0.121342	0.0930231	0.682323
674	30168	0	1.59222	1.59348	-28177.7	1991.85	Standard of care	0.0164397	0.452056	30168	0.474061	55.8693	0.00939233	0.0371577	0.135766	0.827076	0.192959	0.079664	0.727377	0.0725135	0.0135014	0.913985	0.0206435	0.0535278	0.925829	0.376851	0.844115	0.130319	0.418356	0.023776	0.023809	0.474312	0.452675	0.82565	0.111999	0.114656	0.732699	0.152646	0.249528	0.20535	0.440617	0.104505	0.0405694	0.00153519	0.909338	0.0485572	0.0769368	0.0885325	0.71674
675	30106.1	0	1.46701	1.46433	-28272.4	1830.41	Standard of care	0.0141453	0.457954	30106.1	0.436164	58.2326	0.0129082	0.0340705	0.145203	0.820727	0.293307	0.0210464	0.685646	0.0307377	0.0232674	0.945995	0.0143499	0.153359	0.832292	0.34092	0.663427	0.13084	0.501052	0.0218973	0.0218913	0.436237	0.458437	0.87872	0.0610761	0.0869258	0.810759	0.102315	0.294854	0.16717	0.427562	0.110414	0.0667509	0.00163691	0.8675	0.064112	0.192148	0.091265	0.660516
676	30453.4	0	1.48643	1.48755	-28595.4	1859.44	Standard of care	0.0128731	0.432053	30453.4	0.444605	56.6788	0.0486829	0.0340084	0.1232	0.842792	0.273826	0.0368252	0.689349	0.0562157	0.03246	0.911324	0.0177005	0.0837131	0.898586	0.409542	0.790166	0.120954	0.479583	0.0222057	0.0222398	0.444716	0.432465	0.8246	0.0910471	0.0669486	0.746138	0.186914	0.308656	0.139424	0.45408	0.0978395	0.0324275	0.00173077	0.915872	0.0499696	0.126983	0.0548332	0.699644
677	30749.3	0	2.90428	2.90313	-27119	3628.91	Standard of care	0.00910632	0.434132	30749.3	0.41869	59.5632	0.0379352	0.0371233	0.199602	0.763275	0.302315	0.0432974	0.654388	0.0224829	0.0168103	0.960707	0.0399414	0.072829	0.88723	0.367	0.631979	0.136595	0.439081	0.0434842	0.0434766	0.418777	0.43463	0.857898	0.0819273	0.055153	0.82521	0.119637	0.288749	0.111606	0.472673	0.126972	0.062501	0.0064543	0.918171	0.0128738	0.165998	0.0481094	0.710219
678	28162.3	0	3.38859	3.39331	-23926.6	4241.64	Standard of care	0.0118362	0.41758	28162.3	0.493481	58.1249	0.0101114	0.0221651	0.0932154	0.88462	0.1796	0.0306336	0.789766	0.0150787	0.0121831	0.972738	0.0466687	0.0972697	0.856062	0.350074	0.777531	0.114654	0.478353	0.0507746	0.0508666	0.493559	0.417877	0.728629	0.172847	0.0747797	0.80601	0.119211	0.2314	0.172023	0.458535	0.138042	0.0313483	0.00811875	0.924956	0.0355768	0.218697	0.0453504	0.683693
679	29453.6	0	1.50516	1.51064	-27572.2	1888.3	Standard of care	0.0101253	0.433123	29453.6	0.506961	54.3955	0.024828	0.0249558	0.118594	0.85645	0.250273	0.0313543	0.718373	0.0116525	0.0156479	0.9727	0.0185263	0.0841961	0.897278	0.405741	0.732933	0.135022	0.460779	0.0225132	0.0226112	0.507023	0.433441	0.843873	0.108799	0.0889079	0.848431	0.0626609	0.24674	0.167886	0.488363	0.0970117	0.0280106	0.00270201	0.92139	0.0478974	0.157198	0.0753607	0.664464
680	32700.4	0	3.30681	3.31154	-28566.9	4139.42	Standard of care	0.0135809	0.438951	32700.4	0.481365	54.8662	0.0288348	0.0840221	0.13908	0.776898	0.294479	0.0331829	0.672338	0.0427173	0.0312614	0.926021	0.0447213	0.0899644	0.865314	0.331239	0.754052	0.131991	0.490512	0.0495134	0.0496047	0.481465	0.439419	0.750602	0.163992	0.0465009	0.783096	0.170403	0.279091	0.127206	0.430666	0.163037	0.0421102	0.00526704	0.868652	0.0839707	0.172484	0.0287529	0.710352
681	30177.8	0	1.7101	1.7033	-28040.2	2129.12	Standard of care	0.013073	0.428612	30177.8	0.365518	58.023	0.0218734	0.0276574	0.17242	0.799923	0.331179	0.0217271	0.647094	0.0501103	0.0155992	0.934291	0.0219415	0.0584916	0.919567	0.303432	0.572898	0.126391	0.440458	0.0255609	0.0254688	0.365587	0.429242	0.834193	0.108006	0.0714954	0.837666	0.0908384	0.283637	0.184322	0.453913	0.0781269	0.0565611	0.0124069	0.866535	0.0644969	0.163225	0.0709863	0.670187
682	30289.4	0	0.618335	0.61979	-29516.4	774.738	Standard of care	0.00712965	0.433196	30289.4	0.473906	56.7946	0.0396258	0.0247076	0.212361	0.762931	0.199824	0.0409974	0.759178	0.0435596	0.0200157	0.936425	0.00596108	0.067604	0.926435	0.33914	0.381168	0.1345	0.478577	0.00920443	0.009234	0.473969	0.433583	0.780136	0.162918	0.082151	0.799102	0.118747	0.326717	0.14636	0.41186	0.115064	0.0345594	0.0239741	0.889039	0.0524274	0.152414	0.0971279	0.64872
683	31733.4	0	0.758684	0.760862	-30785.1	951.077	Standard of care	0.0149649	0.460529	31733.4	0.479286	57.3152	0.045518	0.0307009	0.134438	0.834861	0.297238	0.0101952	0.692566	0.0561301	0.0200356	0.923834	0.00666654	0.0775745	0.915759	0.331932	0.758095	0.117142	0.48544	0.0112804	0.0113332	0.47932	0.461022	0.783158	0.142085	0.0815304	0.797898	0.120571	0.321458	0.152412	0.46791	0.0582194	0.0364645	0.000109079	0.940386	0.0230399	0.151202	0.0515884	0.706886
684	29994.1	0	1.63686	1.64133	-27948.1	2051.66	Standard of care	0.00823304	0.414876	29994.1	0.479585	62.2522	0.0234314	0.0525531	0.231213	0.716234	0.263517	0.0472896	0.689193	0.0114228	0.00413384	0.984443	0.0209555	0.0708319	0.908213	0.293249	0.775655	0.131384	0.49468	0.0244772	0.0245532	0.479672	0.415364	0.849479	0.0599428	0.0642238	0.779262	0.156514	0.245597	0.201262	0.446862	0.106279	0.0512317	0.00940553	0.898711	0.0406514	0.145782	0.0855792	0.675904
685	28521.7	0	2.04298	2.04182	-25968	2552.27	Standard of care	0.0162222	0.442556	28521.7	0.433676	56.0718	0.0253295	0.0878634	0.155209	0.756927	0.294415	0.0229488	0.682636	0.0418949	0.0197411	0.938364	0.0254621	0.0811419	0.893396	0.368109	0.669378	0.137616	0.48184	0.0305361	0.0305384	0.433764	0.443183	0.761832	0.16011	0.112249	0.782808	0.104943	0.21546	0.0730526	0.5678	0.143687	0.0667994	3.28828e-05	0.887925	0.0452429	0.152611	0.115226	0.627169
686	29838.8	0	2.4532	2.45281	-26772.3	3066.01	Standard of care	0.0074232	0.470866	29838.8	0.46145	59.5512	0.0277848	0.09819	0.0836246	0.818185	0.232883	0.050006	0.717111	0.0583149	0.0405763	0.901109	0.0345793	0.0373089	0.928112	0.310422	0.495495	0.129827	0.477526	0.036769	0.0367677	0.461533	0.471016	0.867983	0.0547814	0.0933079	0.797403	0.109289	0.344962	0.147555	0.436743	0.0707399	0.0978976	0.00374778	0.855104	0.0432505	0.133461	0.0632665	0.738454
687	32410.2	0	2.13445	2.135	-29742.2	2668.74	Standard of care	0.0180133	0.431726	32410.2	0.436202	61.2563	0.0133089	0.0435319	0.16236	0.794108	0.211262	0.0513239	0.737414	0.00862692	0.00746504	0.983908	0.0237103	0.174144	0.802145	0.347473	0.614639	0.125525	0.501245	0.0318596	0.0319176	0.436431	0.432451	0.821161	0.075706	0.101578	0.722574	0.175848	0.268529	0.0794743	0.53371	0.118287	0.053909	5.42564e-05	0.901949	0.0440878	0.179528	0.0597745	0.682346
688	32336.6	0	2.19196	2.20047	-29596.7	2750.59	Standard of care	0.0119515	0.436008	32336.6	0.512467	59.4292	0.038559	0.0621037	0.162664	0.775232	0.274422	0.0206511	0.704927	0.0150027	0.0308663	0.954131	0.0300382	0.0458525	0.924109	0.362773	0.875029	0.137011	0.540827	0.032806	0.032944	0.512523	0.436443	0.804717	0.133078	0.067928	0.815172	0.1169	0.218861	0.16477	0.480074	0.136295	0.0479596	2.44801e-05	0.921214	0.030802	0.090966	0.0530902	0.766952
689	31150.7	0	2.23689	2.23677	-28354.6	2795.97	Standard of care	0.012344	0.467294	31150.7	0.465709	57.5111	0.0546015	0.0365921	0.182879	0.780529	0.216273	0.0706966	0.713031	0.0490909	0.0428005	0.908109	0.0286007	0.0996554	0.871744	0.402756	0.790991	0.135198	0.532748	0.0334324	0.0334506	0.465924	0.46778	0.799055	0.11617	0.101213	0.769631	0.129155	0.25636	0.157	0.444063	0.142577	0.0740377	0.00213828	0.879389	0.0444351	0.179656	0.0822319	0.650584
690	30065.2	0	2.49532	2.49436	-26946	3117.95	Standard of care	0.0143775	0.460403	30065.2	0.451059	61.2485	0.00584342	0.0294311	0.14749	0.823079	0.243573	0.0402982	0.716128	0.0287797	0.029187	0.942033	0.0342251	0.0576561	0.908119	0.316125	0.702938	0.123708	0.497047	0.0373451	0.0373443	0.451197	0.460907	0.791054	0.12111	0.0701775	0.824311	0.105511	0.279818	0.181563	0.417732	0.120888	0.0351274	1.60319e-05	0.937801	0.0270555	0.142961	0.113282	0.672427
691	31971	0	1.41947	1.42203	-30196.6	1777.53	Standard of care	0.0131474	0.441805	31971	0.471267	58.0261	0.0562777	0.0338872	0.16963	0.796483	0.241163	0.0159301	0.742907	0.035581	0.0373766	0.927042	0.0165732	0.0900468	0.89338	0.355604	0.81655	0.134753	0.486327	0.0211771	0.0212353	0.471314	0.442358	0.80986	0.10402	0.115866	0.815789	0.0683451	0.269058	0.176705	0.435104	0.119133	0.0542392	0.00696466	0.912869	0.0259269	0.154302	0.0800739	0.67961
692	28871.4	0	1.18403	1.20233	-27391.4	1502.91	Standard of care	0.0141369	0.404093	28871.4	0.50567	58.7307	0.0246313	0.0544551	0.162668	0.782877	0.391401	0.015147	0.593452	0.00493607	0.0122406	0.982823	0.0129233	0.0775693	0.909507	0.367073	0.563481	0.140636	0.496031	0.0176608	0.0179553	0.505715	0.404687	0.838596	0.0950859	0.0438989	0.830447	0.125654	0.290271	0.132632	0.444813	0.132284	0.0221549	5.0338e-05	0.939713	0.0380816	0.200581	0.0537226	0.66598
693	28800.1	0	4.07875	4.0809	-23701.7	5101.12	Standard of care	0.0102824	0.442871	28800.1	0.471663	59.6549	0.0410568	0.0683799	0.111087	0.820533	0.250335	0.0196029	0.730062	0.0336904	0.0133121	0.952998	0.0564077	0.102409	0.841183	0.365597	0.639676	0.124893	0.504457	0.0611212	0.0611714	0.47171	0.443147	0.830144	0.0859333	0.0818556	0.823292	0.0948524	0.200613	0.105978	0.483061	0.210349	0.0477224	0.000659993	0.927543	0.0240743	0.12732	0.0681247	0.717518
694	31414.2	0	1.05503	1.05216	-30095.5	1315.2	Standard of care	0.0134	0.475532	31414.2	0.419121	59.8024	0.0522649	0.0178934	0.124154	0.857953	0.169508	0.0317008	0.798791	0.0515133	0.00860754	0.939879	0.00938669	0.136219	0.854395	0.372447	0.59815	0.13656	0.479873	0.0157094	0.015695	0.419224	0.475923	0.823058	0.052908	0.0629292	0.851558	0.085513	0.228773	0.154535	0.447538	0.169154	0.0381401	0.000363806	0.918594	0.0429026	0.101207	0.0505161	0.741724
695	30060.1	0	3.00188	3.0044	-26307.7	3755.51	Standard of care	0.00734193	0.418309	30060.1	0.46911	55.9462	0.0557833	0.0204365	0.159376	0.820187	0.26751	0.013968	0.718522	0.0382168	0.0532118	0.908571	0.0405737	0.0996695	0.859757	0.388355	0.804315	0.133512	0.448972	0.0449586	0.0450089	0.469131	0.418634	0.840675	0.0854036	0.0773227	0.81004	0.112638	0.247822	0.115562	0.505714	0.130902	0.043142	0.00293724	0.932721	0.0212001	0.125359	0.084036	0.678253
696	30256.8	0	5.69027	5.69292	-23143.9	7116.15	Standard of care	0.0135446	0.421825	30256.8	0.453216	57.0852	0.0169259	0.0251297	0.139955	0.834916	0.222699	0.0214816	0.755819	0.039562	0.0355465	0.924892	0.082575	0.0660935	0.851332	0.407998	0.872074	0.130119	0.514085	0.0852897	0.0853442	0.453287	0.422288	0.878357	0.0590951	0.130988	0.787066	0.0819454	0.285123	0.14969	0.44141	0.123777	0.0291776	0.00495087	0.922219	0.0436531	0.155937	0.0915955	0.685342
697	28984	0	1.58371	1.58474	-27004.4	1980.92	Standard of care	0.00915944	0.497613	28984	0.510752	60.4659	0.0351019	0.0896387	0.0961845	0.814177	0.273005	0.015746	0.711249	0.0119175	0.00991002	0.978172	0.0200723	0.0679977	0.91193	0.345685	0.676694	0.140183	0.490006	0.0237088	0.0237358	0.510782	0.497807	0.852913	0.0945332	0.0627871	0.813589	0.123624	0.255609	0.101915	0.545425	0.0970515	0.0263818	0.0109681	0.920058	0.0425916	0.221675	0.0416961	0.622388
698	30131.7	0	1.46809	1.4713	-28296.6	1839.12	Standard of care	0.0114847	0.432503	30131.7	0.484343	58.9135	0.0338432	0.0535775	0.111206	0.835217	0.222633	0.0301887	0.747179	0.0417773	0.0237506	0.934472	0.0157701	0.130215	0.854015	0.376768	0.484361	0.129022	0.448635	0.0219311	0.0220053	0.484413	0.432851	0.827267	0.109758	0.0725309	0.780283	0.147186	0.211958	0.104212	0.443412	0.240418	0.051885	0.00642363	0.921978	0.0197133	0.136781	0.0603074	0.650739
699	31509.7	0	3.18099	3.18656	-27533.4	3983.21	Standard of care	0.0140045	0.397688	31509.7	0.472377	56.9971	0.0370328	0.0304805	0.206313	0.763206	0.210075	0.0432741	0.746651	0.0555313	0.00255322	0.941915	0.0425553	0.109013	0.848431	0.313141	0.50463	0.130195	0.511382	0.0475899	0.0476975	0.472519	0.398427	0.802485	0.147519	0.0988016	0.765061	0.136137	0.213033	0.144224	0.549793	0.0929494	0.0465202	0.00506375	0.933615	0.0148007	0.175505	0.0424238	0.706633
700	27890	0	1.50862	1.50903	-26004.2	1886.29	Standard of care	0.0106943	0.448246	27890	0.455765	55.2894	0.00828769	0.0809333	0.154469	0.764598	0.228737	0.0521187	0.719144	0.0756568	0.0169675	0.907376	0.0171303	0.105994	0.876875	0.400576	0.728009	0.146036	0.498042	0.0225524	0.0225763	0.455894	0.448637	0.833662	0.115414	0.0843216	0.758243	0.157435	0.256009	0.113566	0.466226	0.164199	0.0520663	3.64897e-05	0.912772	0.0351256	0.130572	0.116738	0.672399
701	31060.8	0	2.46133	2.46642	-27984.2	3083.02	Standard of care	0.0137177	0.460291	31060.8	0.50572	57.0419	0.0376507	0.0239898	0.189164	0.786846	0.273846	0.0295083	0.696646	0.0156734	0.0121817	0.972145	0.0314931	0.113632	0.854875	0.391164	0.568939	0.125276	0.474943	0.0367936	0.036898	0.505803	0.460934	0.841472	0.0859294	0.122114	0.800065	0.0778214	0.285115	0.119962	0.472581	0.122343	0.0241526	0.0110422	0.915891	0.0489138	0.132531	0.0967438	0.702562
702	28486.1	0	5.7997	5.79222	-21236.5	7240.28	Standard of care	0.0109681	0.486697	28486.1	0.388008	56.155	0.0316398	0.0276231	0.153164	0.819213	0.246232	0.0314438	0.722324	0.0389261	0.0327437	0.92833	0.0847795	0.049706	0.865514	0.412577	0.549768	0.12229	0.501062	0.0869432	0.0868385	0.3881	0.487074	0.887052	0.0760135	0.0814098	0.809103	0.109487	0.308226	0.196986	0.433031	0.0617566	0.0296407	0.00448508	0.914002	0.0518719	0.13538	0.0945306	0.672225
703	29175.7	0	1.57321	1.57822	-27209.2	1972.77	Standard of care	0.00785847	0.387542	29175.7	0.477644	59.263	0.0130768	0.0494429	0.190546	0.760011	0.240029	0.0582726	0.701698	0.0231155	0.0129519	0.963933	0.02033	0.0647655	0.914905	0.298896	0.678549	0.131338	0.484226	0.0235371	0.0236199	0.477745	0.387953	0.827201	0.124384	0.0662527	0.856907	0.0768402	0.225625	0.167905	0.502465	0.104005	0.0202424	0.0177128	0.93662	0.0254244	0.105559	0.122179	0.655861
704	29652.1	0	6.09942	6.10541	-22027.9	7631.76	Standard of care	0.0115961	0.407576	29652.1	0.481052	56.515	0.0475036	0.0498427	0.131948	0.818209	0.237979	0.0376811	0.72434	0.02382	0.0293744	0.946806	0.0884458	0.0721463	0.839408	0.41358	0.642817	0.134519	0.492519	0.091427	0.0915312	0.481149	0.407975	0.83212	0.0616508	0.0932731	0.731086	0.175641	0.35569	0.169823	0.362637	0.11185	0.076257	0.00902414	0.893386	0.0213326	0.143401	0.084812	0.685188
705	31629.6	0	0.627083	0.632898	-30845.8	791.123	Standard of care	0.0143465	0.448642	31629.6	0.496473	60.0753	0.0530963	0.0573642	0.118167	0.824469	0.280365	0.0416944	0.67794	0.0159728	0.0147768	0.96925	0.00196949	0.144463	0.853568	0.409328	0.425998	0.12812	0.480831	0.00927294	0.00939737	0.496599	0.449065	0.804877	0.131173	0.0904328	0.819389	0.0901784	0.34017	0.110763	0.454437	0.0946306	0.0303253	0.00257644	0.918775	0.0483232	0.143583	0.136665	0.659699
706	30206.1	0	1.37654	1.37927	-28485.4	1724.09	Standard of care	0.0117968	0.41693	30206.1	0.456833	58.174	0.0342948	0.0475889	0.131394	0.821017	0.200205	0.048985	0.75081	0.0204717	0.00314466	0.976384	0.0175331	0.0561195	0.926347	0.389383	0.347598	0.131899	0.478078	0.0205759	0.0206274	0.456963	0.41734	0.817021	0.137493	0.0995443	0.74584	0.154616	0.237057	0.130167	0.4532	0.179577	0.0242847	0.00262086	0.915911	0.0571838	0.159537	0.0390857	0.68202
707	30316.8	0	1.52603	1.51251	-28409.3	1890.64	Standard of care	0.0157419	0.466985	30316.8	0.377049	55.7202	0.0265572	0.0603656	0.154591	0.785044	0.314773	0.0320146	0.653213	0.0307586	0.0152783	0.953963	0.0135142	0.18011	0.806376	0.372823	0.648946	0.130666	0.506463	0.0227541	0.0225901	0.377188	0.467542	0.814367	0.0847461	0.0900849	0.807877	0.102038	0.216305	0.155662	0.535333	0.0927	0.0455712	0.00150985	0.901861	0.0510579	0.155189	0.085572	0.649144
708	29591.1	0	1.99259	1.99191	-27100.3	2489.89	Standard of care	0.00983665	0.450972	29591.1	0.438634	56.5642	0.0557866	0.0502238	0.165437	0.784339	0.196315	0.0367783	0.766907	0.0163195	0.0493947	0.934286	0.0255514	0.0904696	0.883979	0.355819	0.716668	0.132898	0.467973	0.0297976	0.0298011	0.438717	0.451384	0.762374	0.158273	0.0789664	0.762253	0.15878	0.26337	0.150666	0.457229	0.128735	0.0286174	9.9537e-05	0.942542	0.0287415	0.129921	0.0726479	0.74182
709	31312.3	0	2.19942	2.19755	-28563	2746.93	Standard of care	0.0129872	0.422781	31312.3	0.408344	59.2064	0.029035	0.0553214	0.129546	0.815132	0.323619	0.0931504	0.58323	0.0208226	0.00872457	0.970453	0.0271692	0.108934	0.863897	0.323008	0.711726	0.119564	0.488802	0.0328915	0.032885	0.408652	0.423218	0.786903	0.114324	0.107548	0.754082	0.138369	0.269721	0.132245	0.444655	0.153379	0.0193631	0.000743305	0.964975	0.0149182	0.127669	0.0682081	0.706903
710	30173.3	0	1.97273	1.97335	-27707.4	2466.69	Standard of care	0.0127788	0.441281	30173.3	0.448647	56.9441	0.0544353	0.0461997	0.188056	0.765744	0.217543	0.0408392	0.741617	0.0137607	0.00219539	0.984044	0.0257565	0.072975	0.901269	0.358567	0.904456	0.127447	0.478569	0.0294834	0.0295075	0.448768	0.441892	0.835229	0.102964	0.0457919	0.826103	0.128105	0.215788	0.158723	0.484263	0.141227	0.0225439	0.00306725	0.89442	0.0799688	0.11753	0.0590579	0.753352
711	30069.8	0	2.2802	2.27718	-27219.5	2846.48	Standard of care	0.0116761	0.450785	30069.8	0.419788	61.3088	0.0152654	0.0230369	0.154134	0.822829	0.280671	0.0381597	0.681169	0.0164715	0.0125973	0.970931	0.0309284	0.0608837	0.908188	0.361929	0.486834	0.137179	0.471166	0.0341295	0.0340955	0.419894	0.451236	0.829672	0.104237	0.0958045	0.805546	0.0986498	0.302131	0.180014	0.435051	0.0828043	0.0684392	0.00495903	0.853161	0.0734411	0.141407	0.0590012	0.717592
712	30553	0	3.9807	3.97998	-25577.1	4974.98	Standard of care	0.0138638	0.428934	30553	0.423383	59.1421	0.0416712	0.0330287	0.168809	0.798163	0.296699	0.0198017	0.6835	0.0197041	0.0275402	0.952756	0.0546772	0.103025	0.842298	0.291238	0.565633	0.126136	0.508636	0.0596067	0.0596176	0.423454	0.429508	0.843793	0.103091	0.0672236	0.811387	0.121389	0.239091	0.167588	0.487642	0.105678	0.0614651	0.00693358	0.885032	0.0465695	0.152593	0.0772977	0.699805
713	29925.2	0	1.36819	1.36851	-28214.9	1710.63	Standard of care	0.00523378	0.450371	29925.2	0.458564	55.8582	0.0235744	0.0130244	0.140207	0.846769	0.264575	0.0312498	0.704176	0.0349755	0.0347658	0.930259	0.0173831	0.0674401	0.915177	0.346205	0.790841	0.135963	0.480912	0.0204877	0.0204983	0.458601	0.450552	0.824813	0.0786712	0.059099	0.825778	0.115123	0.218856	0.189565	0.440984	0.150595	0.0447187	0.00270661	0.914531	0.0380435	0.137119	0.0618419	0.674763
714	30018.9	0	2.32646	2.32846	-27110.8	2910.57	Standard of care	0.00976313	0.416718	30018.9	0.444238	55.8828	0.0311731	0.0496202	0.154945	0.795434	0.262332	0.0109472	0.726721	0.0363512	0.0177047	0.945944	0.0320994	0.0496497	0.918251	0.401153	0.809034	0.132529	0.494952	0.034842	0.0348796	0.444264	0.417104	0.822809	0.115059	0.098922	0.83842	0.0626576	0.248098	0.132105	0.508927	0.110871	0.0270611	6.34254e-05	0.951901	0.0209744	0.157949	0.0528516	0.705171
715	29178.3	0	3.64699	3.65003	-24619.6	4562.54	Standard of care	0.00853866	0.411046	29178.3	0.451576	57.3139	0.0331456	0.0513597	0.229474	0.719166	0.295216	0.0362888	0.668496	0.00945654	0.0162561	0.974287	0.0516955	0.0608845	0.88742	0.408081	0.593407	0.120462	0.460577	0.054633	0.0546865	0.451644	0.411593	0.8499	0.0664445	0.0732969	0.854212	0.0724916	0.188365	0.14953	0.558003	0.104102	0.0482402	0.00273968	0.921398	0.027622	0.185407	0.0889758	0.67742
716	31457.3	0	0.795486	0.797974	-30462.9	997.468	Standard of care	0.0120165	0.42552	31457.3	0.446161	60.2227	0.045539	0.0185387	0.181135	0.800326	0.313649	0.0572571	0.629094	0.0184181	0.0665412	0.915041	0.00640036	0.104377	0.889223	0.295962	0.592886	0.122375	0.513005	0.011809	0.0118661	0.446332	0.426055	0.818731	0.111595	0.0769548	0.81306	0.109985	0.290642	0.169497	0.456964	0.082897	0.0410959	0.0031354	0.934898	0.0208705	0.162952	0.0754077	0.723413
717	29406.1	0	1.76537	1.76657	-27199.4	2208.21	Standard of care	0.0153673	0.438667	29406.1	0.452259	58.0003	0.0466171	0.0662101	0.143663	0.790127	0.187975	0.0507433	0.761282	0.021661	0.0300783	0.948261	0.0245668	0.0199537	0.955479	0.299505	0.666417	0.128718	0.517332	0.026395	0.026418	0.452452	0.439188	0.826961	0.134921	0.0682222	0.849076	0.0827022	0.247092	0.178184	0.431768	0.142956	0.0367829	0.000525848	0.9265	0.0361913	0.0895868	0.0285325	0.795285
718	28414.6	0	0.99737	0.999227	-27167.9	1249.03	Standard of care	0.013033	0.444601	28414.6	0.462511	60.232	0.0465739	0.0384478	0.182764	0.778788	0.263198	0.0342114	0.70259	0.0223327	0.0206647	0.957003	0.0106478	0.0762017	0.913151	0.400299	0.636914	0.132177	0.495433	0.0148492	0.0148933	0.462614	0.445181	0.808717	0.0565919	0.079524	0.795148	0.125328	0.216334	0.255143	0.432117	0.096407	0.0673994	0.00137562	0.92018	0.0110446	0.106037	0.0983525	0.708373
719	30742	0	0.741235	0.740346	-29815.5	925.433	Standard of care	0.00763952	0.445805	30742	0.430481	55.6622	0.0424112	0.0483359	0.163036	0.788628	0.262185	0.031223	0.706592	0.0232205	0.0414717	0.935308	0.00661417	0.0907396	0.902646	0.325812	0.55727	0.134021	0.479655	0.0110479	0.011045	0.430537	0.446116	0.833481	0.111456	0.0965289	0.773851	0.12962	0.305527	0.10885	0.527777	0.0578454	0.0219549	0.0080364	0.89217	0.0778387	0.143072	0.0457371	0.647943
720	31291.8	0	4.3951	4.39572	-25797.9	5494.65	Standard of care	0.00756791	0.434342	31291.8	0.453	54.1668	0.0421374	0.0138091	0.0904119	0.895779	0.177645	0.0334302	0.788924	0.0346799	0.00410938	0.961211	0.0607053	0.126932	0.812363	0.36939	0.750117	0.139488	0.454823	0.065877	0.0659026	0.453054	0.434523	0.774515	0.16393	0.123957	0.767432	0.10861	0.209314	0.216283	0.474288	0.100115	0.0436372	0.0313748	0.887746	0.0372417	0.200079	0.0432676	0.635467
721	31791.3	0	0.831635	0.83336	-30751.7	1041.7	Standard of care	0.0086213	0.421189	31791.3	0.455524	64.3047	0.0179018	0.035048	0.108376	0.856576	0.188695	0.0336505	0.777654	0.0114916	0.0403602	0.948148	0.00957574	0.0567608	0.933663	0.361925	0.645035	0.132625	0.495799	0.0124265	0.0124607	0.455592	0.421426	0.856676	0.0807822	0.0600346	0.830086	0.109879	0.316607	0.122051	0.504453	0.0568891	0.0516922	1.21862e-06	0.876962	0.0713447	0.144933	0.0649568	0.669014
722	30766.4	0	1.42106	1.4218	-28990.1	1777.25	Standard of care	0.0153748	0.420899	30766.4	0.427091	58.2415	0.0240858	0.12267	0.147073	0.730257	0.275174	0.0351163	0.68971	0.0217748	0.0395335	0.938692	0.0172552	0.049699	0.933046	0.39394	0.820328	0.129332	0.460868	0.0212166	0.0212388	0.427215	0.421514	0.850065	0.0865178	0.0865822	0.76074	0.152678	0.29409	0.161609	0.41682	0.127481	0.0530679	0.001941	0.903919	0.0410725	0.130452	0.0948205	0.604062
723	30842.7	0	1.249	1.25325	-29281.4	1566.56	Standard of care	0.0048124	0.447535	30842.7	0.539492	59.4125	0.015143	0.0673006	0.115493	0.817206	0.295098	0.0139672	0.690935	0.0142882	0.0247702	0.960942	0.0158472	0.0593402	0.924813	0.354766	0.686955	0.123687	0.515769	0.0187111	0.0187807	0.539506	0.447665	0.86118	0.051938	0.0548323	0.839113	0.106055	0.21482	0.156901	0.537426	0.0908527	0.0171432	0.00746553	0.888234	0.0871577	0.143329	0.0634793	0.72591
724	29102.7	0	2.51708	2.51512	-25956.4	3143.91	Standard of care	0.0168103	0.429562	29102.7	0.414514	60.6067	0.0406581	0.03031	0.161719	0.807971	0.262057	0.0144539	0.723489	0.0297098	0.0167709	0.953519	0.0344634	0.0520559	0.913481	0.314844	0.643847	0.123937	0.500079	0.0376542	0.0376379	0.414577	0.430241	0.816214	0.0950904	0.062587	0.789952	0.147461	0.254204	0.148239	0.475021	0.122536	0.0527241	0.00556851	0.898545	0.0431628	0.189208	0.0501983	0.641192
725	31559.9	0	1.54644	1.55125	-29626.8	1939.06	Standard of care	0.0100204	0.406694	31559.9	0.461469	58.5311	0.0565735	0.0542136	0.23637	0.709417	0.295338	0.0275765	0.677086	0.00544131	0.0160189	0.97854	0.0175132	0.115247	0.86724	0.365526	0.535014	0.129732	0.454326	0.0230726	0.0231627	0.461528	0.407362	0.775807	0.070411	0.103431	0.817099	0.0794701	0.280308	0.133272	0.478992	0.107429	0.08024	0.00109909	0.877814	0.0408472	0.197112	0.114416	0.624864
726	30305.5	0	3.14497	3.15574	-26374.3	3944.68	Standard of care	0.0116788	0.421609	30305.5	0.523644	53.6115	0.0358907	0.0606835	0.206909	0.732407	0.305946	0.0351903	0.658864	0.017562	0.0233213	0.959117	0.0410015	0.130207	0.828791	0.33879	0.742417	0.125594	0.471565	0.0470547	0.0472433	0.523725	0.422255	0.852027	0.0572341	0.104268	0.735994	0.159738	0.302579	0.14669	0.423229	0.127502	0.0346486	0.000655277	0.922377	0.0423189	0.141594	0.0783639	0.679083
727	30430.5	0	4.69132	4.70188	-24566.4	5877.35	Standard of care	0.0203845	0.421716	30430.5	0.504696	62.6185	0.0215308	0.0284348	0.138741	0.832825	0.231297	0.0546851	0.714018	0.0240133	0.129672	0.846314	0.0665849	0.085331	0.848084	0.365307	0.76349	0.129841	0.464126	0.0702042	0.0703964	0.504919	0.422479	0.811134	0.1055	0.069318	0.814263	0.116418	0.187713	0.16766	0.496726	0.147901	0.0393257	0.00561623	0.915417	0.039641	0.137665	0.0530901	0.724046
728	30944.5	0	2.11386	2.11479	-28302.2	2643.49	Standard of care	0.0095649	0.43775	30944.5	0.449854	63.3744	0.0309906	0.0431178	0.121397	0.835485	0.284639	0.0301645	0.685196	0.0365365	0.0177217	0.945742	0.0271159	0.0923578	0.880526	0.329476	0.280069	0.126539	0.489035	0.0316459	0.0316744	0.449922	0.438042	0.798686	0.131278	0.0654057	0.80323	0.131364	0.254753	0.195904	0.413511	0.135833	0.0163057	0.028199	0.908648	0.046847	0.129659	0.0761837	0.651916
729	29187.2	0	1.35059	1.35088	-27499	1688.6	Standard of care	0.00863353	0.441925	29187.2	0.446495	58.0358	0.038964	0.0352044	0.172026	0.79277	0.269409	0.0146961	0.715895	0.0243031	0.00806302	0.967634	0.0178048	0.0429057	0.939289	0.325818	0.57741	0.135326	0.454205	0.0201994	0.0202097	0.446523	0.442317	0.819255	0.0525988	0.0710963	0.752815	0.176089	0.242581	0.195556	0.44029	0.121574	0.0378541	0.0011945	0.951491	0.00946034	0.0980564	0.122339	0.712049
730	30465.9	0	0.440873	0.442511	-29914.8	553.139	Standard of care	0.0133938	0.407896	30465.9	0.434311	58.3208	0.022886	0.0456128	0.208817	0.74557	0.211281	0.0359793	0.75274	0.0500097	0.00995587	0.940034	0.00213709	0.0789315	0.918931	0.309583	0.830449	0.126338	0.427907	0.00648768	0.00652763	0.434413	0.408724	0.813571	0.130733	0.11604	0.776134	0.107825	0.28712	0.12655	0.510419	0.0759117	0.0562023	0.00224107	0.90781	0.0337467	0.10076	0.0900154	0.723642
731	28964	0	0.69743	0.697508	-28092.2	871.886	Standard of care	0.0153591	0.473355	28964	0.473964	59.0588	0.0433957	0.0586162	0.176192	0.765192	0.33247	0.0465157	0.621014	0.0538021	0.0257788	0.920419	0.00613821	0.0591722	0.93469	0.399333	0.492076	0.124156	0.449458	0.0103343	0.0103503	0.474112	0.474042	0.875737	0.084864	0.115695	0.745398	0.138907	0.240134	0.205845	0.457829	0.0961914	0.0344758	0.00301225	0.89104	0.0714716	0.156126	0.0887074	0.655733
732	29994.9	0	5.40486	5.40462	-23238.8	6755.77	Standard of care	0.00635825	0.453833	29994.9	0.445061	53.9737	0.019945	0.0532998	0.163088	0.783612	0.161669	0.0148513	0.82348	0.0204362	0.0278278	0.951736	0.0791145	0.047988	0.872897	0.377751	0.596512	0.131678	0.461449	0.0810478	0.081049	0.445082	0.454097	0.78069	0.14171	0.0758339	0.831836	0.0923304	0.305938	0.155924	0.436835	0.101303	0.0658208	0.00962909	0.893073	0.0314772	0.192217	0.0348311	0.65995
733	30517.2	0	1.09783	1.09734	-29144.9	1371.68	Standard of care	0.00588974	0.451673	30517.2	0.438589	60.7528	0.0377036	0.0629587	0.157072	0.779969	0.213577	0.0448042	0.741618	0.0363348	0.0124018	0.951263	0.00999816	0.143459	0.846542	0.409848	0.63361	0.135663	0.530291	0.0164026	0.0164087	0.438657	0.451878	0.846891	0.101139	0.143753	0.608105	0.248142	0.306277	0.0768239	0.466871	0.150028	0.0544634	4.67046e-05	0.935536	0.00995398	0.166843	0.118701	0.621582
734	31107.7	0	1.98217	1.98367	-28629.9	2479.59	Standard of care	0.0113707	0.435121	31107.7	0.457246	59.0749	0.0503541	0.0672075	0.169194	0.763599	0.217395	0.0419214	0.740683	0.037513	0.0288494	0.933638	0.0255858	0.0783013	0.896113	0.371958	0.721608	0.135384	0.49703	0.0296383	0.0296749	0.457357	0.435594	0.810511	0.110473	0.0557597	0.852244	0.0919966	0.315905	0.141858	0.421201	0.121036	0.0336355	0.00383888	0.943158	0.0193675	0.104718	0.0995529	0.691304
735	30959.3	0	1.83328	1.83084	-28667.7	2288.55	Standard of care	0.0111918	0.418265	30959.3	0.380992	57.2342	0.0120301	0.0556233	0.135922	0.808454	0.221172	0.0578059	0.721022	0.0398407	0.0160403	0.944119	0.0228804	0.0897114	0.887408	0.303545	0.951783	0.136125	0.479737	0.027427	0.0274046	0.381158	0.418662	0.843816	0.0908174	0.104591	0.827125	0.0682846	0.347733	0.12689	0.362021	0.163357	0.0420964	2.65365e-06	0.936939	0.0209621	0.183108	0.051442	0.687391
736	30580.2	0	3.2605	3.25968	-26504.6	4074.6	Standard of care	0.011479	0.428793	30580.2	0.419292	60.9274	0.0237832	0.0541662	0.170532	0.775302	0.250211	0.0827252	0.667064	0.0317205	0.00144512	0.966834	0.0457598	0.057866	0.896374	0.316568	0.764398	0.116461	0.509498	0.0488297	0.0488276	0.41954	0.429277	0.786215	0.149319	0.0690795	0.792643	0.138277	0.230403	0.15162	0.462396	0.155581	0.0603158	0.00172055	0.893471	0.0444928	0.174655	0.0490531	0.672072
737	28121.3	0	4.493	4.49645	-22505.1	5620.57	Standard of care	0.00887418	0.439768	28121.3	0.49326	62.6272	0.0152364	0.0292631	0.223635	0.747101	0.236517	0.0376756	0.725807	0.0184773	0.0117422	0.96978	0.0626972	0.109687	0.827616	0.304672	0.594875	0.129361	0.499851	0.0673208	0.0673892	0.493333	0.440252	0.786712	0.14071	0.119034	0.79511	0.0858563	0.259823	0.194099	0.461571	0.0845074	0.0468994	0.00262767	0.924745	0.0257277	0.186959	0.13887	0.624354
738	28819.7	0	3.87825	3.88419	-23971.9	4855.24	Standard of care	0.0112918	0.455121	28819.7	0.531711	58.5319	0.053638	0.0327814	0.152236	0.814983	0.280751	0.0489226	0.670326	0.0655168	0.0200005	0.914483	0.0524674	0.125231	0.822301	0.343956	0.657041	0.139551	0.477162	0.0580675	0.0581824	0.531817	0.455542	0.842688	0.0866653	0.0795169	0.818524	0.101959	0.296152	0.190627	0.397873	0.115349	0.0540283	1.24114e-05	0.89347	0.0524897	0.178597	0.109153	0.643432
739	30790.2	0	1.676	1.67311	-28695.2	2091.38	Standard of care	0.00736923	0.463512	30790.2	0.370272	58.0211	0.00967072	0.0395517	0.145778	0.81467	0.182241	0.0453466	0.772412	0.0480287	0.0145855	0.937386	0.022068	0.0630894	0.914843	0.39078	0.710619	0.130448	0.464821	0.0250962	0.0250596	0.370357	0.46378	0.837717	0.0890179	0.124555	0.784537	0.0909079	0.248972	0.148954	0.397452	0.204622	0.0474986	0.00539438	0.903608	0.0434991	0.119476	0.0698561	0.676698
740	28861.5	0	0.551769	0.559197	-28171.8	698.996	Standard of care	0.0123857	0.450168	28861.5	0.521387	57.7746	0.0449898	0.0312047	0.144573	0.824222	0.305119	0.0273106	0.66757	0.0345981	0.041723	0.923679	0.00362799	0.0841972	0.912175	0.347648	0.797448	0.129039	0.470223	0.00817416	0.00830538	0.521453	0.450623	0.842734	0.127022	0.0537226	0.859085	0.0871928	0.307037	0.0851556	0.470283	0.137524	0.03518	0.000543532	0.930418	0.0338585	0.148186	0.0336439	0.750157
741	29026.2	0	2.55741	2.55505	-25829.4	3193.82	Standard of care	0.015061	0.469052	29026.2	0.446043	58.2315	0.0466504	0.0622876	0.161108	0.776604	0.245909	0.0132389	0.740852	0.0259769	0.00965449	0.964369	0.0340311	0.0785211	0.887448	0.305857	0.785028	0.126054	0.465054	0.0382541	0.0382374	0.446088	0.469655	0.879353	0.0647671	0.0394995	0.827645	0.132855	0.268321	0.177429	0.45851	0.0957399	0.0286754	0.00834717	0.868963	0.0940141	0.231462	0.092654	0.63468
742	30431.7	0	2.37584	2.38005	-27461.9	2975.06	Standard of care	0.0186751	0.442696	30431.7	0.472212	55.1946	0.0444674	0.0306149	0.178171	0.791214	0.254649	0.0331824	0.712168	0.00974917	0.0432102	0.947041	0.0307171	0.0936458	0.875637	0.377097	0.485499	0.126942	0.471039	0.0354759	0.0355685	0.472346	0.443552	0.773685	0.145718	0.100625	0.751395	0.14798	0.219747	0.207	0.440737	0.132517	0.0227306	0.0315577	0.909443	0.0362688	0.135146	0.0854048	0.685723
743	28972.1	0	3.14719	3.14675	-25038.1	3933.43	Standard of care	0.00753472	0.413112	28972.1	0.406096	60.8916	0.0482198	0.0432802	0.15755	0.79917	0.297885	0.0284831	0.673632	0.026017	0.00920945	0.964774	0.0436345	0.0738607	0.882505	0.400745	0.52666	0.128017	0.46221	0.0471533	0.0471548	0.406148	0.413438	0.878999	0.0489893	0.103868	0.785619	0.110513	0.267626	0.207293	0.441394	0.0836864	0.0601301	0.000455896	0.894722	0.0446918	0.187858	0.0933023	0.686036
744	31944.2	0	1.58354	1.59088	-29964.8	1988.6	Standard of care	0.0144627	0.440739	31944.2	0.522249	58.4484	0.0546237	0.0479326	0.193532	0.758535	0.27983	0.014328	0.705842	0.0860192	0.0341573	0.879824	0.017397	0.119119	0.863484	0.344878	0.801858	0.121699	0.487083	0.0236052	0.0237461	0.522292	0.441445	0.861436	0.117107	0.0898746	0.749621	0.160504	0.221067	0.133599	0.479068	0.166265	0.115965	0.0139715	0.828016	0.0420471	0.139711	0.0491975	0.753228
745	30979.9	0	3.29984	3.2996	-26855.1	4124.5	Standard of care	0.00997841	0.439524	30979.9	0.436392	62.9187	0.0271316	0.0291363	0.121581	0.849283	0.253492	0.00975404	0.736754	0.0203082	0.0113527	0.968339	0.0444921	0.110223	0.845285	0.307408	0.694934	0.130389	0.491993	0.0494385	0.0494528	0.436415	0.439824	0.836181	0.104916	0.0512532	0.814801	0.133945	0.216504	0.122326	0.514193	0.146976	0.0561317	0.000101518	0.878339	0.0654274	0.169052	0.0671375	0.640992
746	30530.6	0	1.9512	1.94978	-28091.6	2437.22	Standard of care	0.0105667	0.448155	30530.6	0.423363	56.946	0.00746116	0.0147728	0.142641	0.842586	0.216012	0.0248129	0.759175	0.0452983	0.0134625	0.941239	0.0264129	0.0555958	0.917991	0.320598	0.549368	0.141843	0.476643	0.0292112	0.0291989	0.423425	0.448529	0.879999	0.0882271	0.127618	0.770672	0.101711	0.277191	0.11771	0.414249	0.19085	0.0338786	0.000673211	0.90121	0.0642385	0.21817	0.10172	0.587718
747	28978.7	0	1.44777	1.45165	-27169	1814.56	Standard of care	0.0143498	0.408652	28978.7	0.444093	60.6803	0.0278576	0.0343741	0.183257	0.782369	0.239959	0.0894083	0.670632	0.0259023	0.0156167	0.958481	0.0155892	0.119952	0.864458	0.322241	0.828112	0.128627	0.527108	0.0215794	0.0216639	0.444421	0.409293	0.828938	0.117552	0.0752429	0.83853	0.0862269	0.230351	0.177063	0.498789	0.0937969	0.010675	0.00223909	0.927934	0.0591523	0.137331	0.0550239	0.708205
748	28897.5	0	1.855	1.85309	-26578.7	2316.36	Standard of care	0.0124621	0.448366	28897.5	0.43269	63.512	0.0195473	0.0426231	0.129946	0.827431	0.371643	0.0355876	0.592769	0.0419111	0.0110323	0.947057	0.0239772	0.0615771	0.914446	0.312868	0.461754	0.139321	0.443182	0.0277509	0.0277344	0.432786	0.448794	0.879296	0.0577905	0.0896496	0.790186	0.120165	0.218767	0.152364	0.513351	0.115518	0.0227129	0.000553862	0.96645	0.0102829	0.17566	0.055107	0.708067
749	32237.2	0	2.68033	2.68242	-28886.8	3353.02	Standard of care	0.00941053	0.42408	32237.2	0.450528	59.0845	0.0381995	0.0738935	0.113583	0.812523	0.263539	0.0411899	0.695271	0.0051056	0.0174428	0.977452	0.0362983	0.0774379	0.886264	0.389038	0.825814	0.138444	0.486337	0.0401485	0.0401917	0.450617	0.424352	0.753208	0.14244	0.101437	0.831523	0.0670401	0.23333	0.173164	0.444169	0.149337	0.0478392	0.00012877	0.888191	0.063841	0.145343	0.0648861	0.656509
750	30890.4	0	1.21872	1.22008	-29367	1525.1	Standard of care	0.0126903	0.451997	30890.4	0.476515	62.9404	0.0404821	0.0485414	0.121617	0.829841	0.186984	0.010239	0.802777	0.0243505	0.00680696	0.968843	0.0161845	0.0319895	0.951826	0.331067	0.827033	0.123778	0.403838	0.0182144	0.0182419	0.476539	0.452439	0.836002	0.0958285	0.060489	0.757365	0.182146	0.236395	0.0992643	0.502891	0.16145	0.034193	0.00130237	0.945042	0.019463	0.0840765	0.105351	0.66066
751	31296.4	0	1.80606	1.80618	-29038.8	2257.72	Standard of care	0.0126247	0.463555	31296.4	0.464367	57.2942	0.0232666	0.059158	0.159223	0.781619	0.343386	0.0332891	0.623325	0.010656	0.0250588	0.964285	0.0228928	0.0684532	0.908654	0.40895	0.583942	0.127542	0.529675	0.0270084	0.0270247	0.464471	0.463998	0.849281	0.10133	0.0607652	0.808492	0.130742	0.220443	0.162505	0.494315	0.122737	0.0516622	0.00177481	0.923836	0.0227274	0.125085	0.107451	0.678071
752	28145.4	0	1.03974	1.0421	-26845.7	1302.62	Standard of care	0.0100354	0.411981	28145.4	0.443479	62.846	0.0408596	0.0526115	0.186009	0.761379	0.274876	0.0260556	0.699068	0.0244852	0.0267473	0.948768	0.0085395	0.147024	0.844436	0.409349	0.724368	0.13164	0.449098	0.0154814	0.0155394	0.443536	0.412506	0.815978	0.100033	0.0813847	0.788442	0.130174	0.248659	0.13181	0.489142	0.130389	0.0760055	0.0167223	0.876926	0.0303458	0.168152	0.0668394	0.682756
753	32206.5	0	1.67559	1.67822	-30112	2097.77	Standard of care	0.00856432	0.449496	32206.5	0.508839	61.0646	0.0112313	0.0293288	0.150383	0.820289	0.194333	0.046105	0.759562	0.0202095	0.0229835	0.956807	0.021766	0.0722519	0.905982	0.366369	0.654587	0.147658	0.444034	0.0250733	0.0251239	0.508913	0.449832	0.762343	0.105867	0.089756	0.768528	0.141716	0.26206	0.172192	0.429668	0.136081	0.0348844	0.0269213	0.897773	0.0404215	0.148641	0.0761064	0.710495
754	28742	0	1.84074	1.84734	-26441.1	2309.18	Standard of care	0.016655	0.456849	28742	0.500547	53.4193	0.0277563	0.0512582	0.224403	0.724339	0.283713	0.0745676	0.641719	0.0109098	0.0200216	0.969069	0.0247979	0.0352174	0.939985	0.382593	0.763282	0.143767	0.493673	0.0274686	0.0275768	0.50081	0.457729	0.82693	0.0906653	0.109828	0.753272	0.136901	0.214577	0.172794	0.504659	0.10797	0.0417507	0.0129225	0.924001	0.0213257	0.134431	0.0969877	0.703521
755	31495.2	0	3.99585	3.99892	-26500.4	4998.66	Standard of care	0.0110996	0.425241	31495.2	0.468804	58.6773	0.0245835	0.0835567	0.132989	0.783454	0.289896	0.052793	0.657311	0.111964	0.00557486	0.882461	0.0562941	0.0628164	0.88089	0.338682	0.841308	0.143884	0.529301	0.0598818	0.0599385	0.468945	0.425583	0.845526	0.0918479	0.0704626	0.798856	0.130681	0.289836	0.130534	0.480032	0.0995982	0.0575596	0.0205123	0.885998	0.0359299	0.126167	0.0713008	0.724997
756	30623.4	0	1.36172	1.35832	-28921.2	1697.91	Standard of care	0.0137794	0.463749	30623.4	0.431568	54.8762	0.0376686	0.0586412	0.13974	0.801619	0.236832	0.0780768	0.685091	0.00799915	0.0271816	0.964819	0.0139965	0.126321	0.859682	0.32097	0.695799	0.140997	0.498155	0.0203028	0.0202797	0.43183	0.464194	0.820116	0.113272	0.110212	0.750186	0.139602	0.286389	0.138572	0.458655	0.116383	0.0310873	0.00113705	0.939491	0.0282843	0.123956	0.0725127	0.74822
757	30007.8	0	3.04109	3.03913	-26206.4	3798.91	Standard of care	0.0151143	0.437036	30007.8	0.414297	57.6051	0.0168915	0.0307292	0.138431	0.830839	0.202671	0.019264	0.778065	0.0178957	0.0100974	0.972007	0.0421654	0.0704523	0.887382	0.316186	0.812746	0.130476	0.463731	0.0455332	0.04552	0.414365	0.437585	0.84094	0.0696056	0.0547543	0.805588	0.139657	0.280885	0.137452	0.470229	0.111434	0.053218	0.0109689	0.910639	0.0251739	0.149018	0.0925076	0.683214
758	30055.9	0	0.821839	0.81886	-29028.6	1023.57	Standard of care	0.00867732	0.450232	30055.9	0.373267	56.9015	0.0356956	0.0610177	0.258837	0.680146	0.164101	0.0894035	0.746496	0.0288431	0.0148756	0.956281	0.00923368	0.0569359	0.93383	0.407228	0.683187	0.116891	0.479799	0.012232	0.0121948	0.373473	0.4508	0.87366	0.0780058	0.0372455	0.875613	0.0871414	0.215157	0.183048	0.457804	0.143991	0.0352581	0.00110402	0.911591	0.0520464	0.10163	0.0541855	0.755069
759	29410.1	0	4.91737	4.91894	-23263.3	6148.68	Standard of care	0.0107105	0.409092	29410.1	0.429461	60.7398	0.0457221	0.0679947	0.147486	0.784519	0.23745	0.0444248	0.718125	0.0144881	0.0181164	0.967396	0.0714688	0.0462493	0.882282	0.301251	0.764343	0.126371	0.483277	0.0737028	0.0737339	0.429576	0.409513	0.850148	0.0935761	0.0472609	0.80438	0.148359	0.281446	0.147387	0.503181	0.067986	0.0665016	7.08497e-06	0.89582	0.0376712	0.217136	0.0433412	0.657247
760	31767.7	0	0.525187	0.527361	-31111.2	659.201	Standard of care	0.0147179	0.440135	31767.7	0.462944	59.1069	0.019837	0.0352832	0.26618	0.698537	0.242385	0.0422986	0.715317	0.0265568	0.0179672	0.955476	0.00376536	0.068132	0.928103	0.409837	0.725993	0.129675	0.448233	0.00771681	0.00776469	0.463075	0.441188	0.836541	0.0974985	0.064758	0.831194	0.104048	0.220342	0.130438	0.505414	0.143807	0.0429582	0.000453118	0.937956	0.0186324	0.235445	0.0910338	0.574621
761	29137.6	0	2.35632	2.35992	-26192.2	2949.9	Standard of care	0.00532222	0.437494	29137.6	0.488944	60.0871	0.0171187	0.0459862	0.14275	0.811264	0.399422	0.056288	0.54429	0.0163389	0.00890051	0.974761	0.0306413	0.101088	0.868271	0.340663	0.541158	0.129041	0.512658	0.0353089	0.0353721	0.489012	0.437676	0.796046	0.152499	0.0898805	0.786209	0.12391	0.315775	0.199046	0.382018	0.103162	0.0384458	0.000926151	0.915669	0.0449587	0.139543	0.0346641	0.756444
762	30584.5	0	2.08785	2.09083	-27974.7	2613.54	Standard of care	0.0123498	0.431425	30584.5	0.473847	57.9808	0.0494793	0.0541657	0.0969592	0.848875	0.231059	0.0442877	0.724653	0.0341041	0.0305267	0.935369	0.0277367	0.067071	0.905192	0.355889	0.880606	0.131644	0.432456	0.0312443	0.0313031	0.473955	0.431761	0.827758	0.112036	0.111288	0.757115	0.131597	0.272899	0.182025	0.414801	0.130274	0.0306535	0.00299301	0.943783	0.0225705	0.172046	0.0741382	0.691704
763	30816.3	0	3.94394	3.94352	-25886.4	4929.4	Standard of care	0.00427521	0.459789	30816.3	0.448015	63.7769	0.0172434	0.044573	0.129117	0.82631	0.29779	0.0179138	0.684296	0.0200546	0.0303539	0.949592	0.0567249	0.0542521	0.889023	0.413484	0.53849	0.135366	0.456091	0.0591448	0.0591422	0.448031	0.459929	0.850631	0.0834627	0.0880614	0.797047	0.114891	0.247131	0.150917	0.473004	0.128949	0.0691137	0.00556955	0.8951	0.0302172	0.0997998	0.0698077	0.755777
764	30907.5	0	2.25444	2.25605	-28089.4	2820.06	Standard of care	0.0130729	0.434028	30907.5	0.44907	56.3461	0.0107811	0.0343379	0.197974	0.767688	0.301295	0.0441016	0.654603	0.0416328	0.0380719	0.920295	0.0284482	0.104247	0.867305	0.385895	0.766742	0.133771	0.4724	0.0337029	0.033748	0.4492	0.434697	0.815956	0.104179	0.0844523	0.782574	0.132973	0.213114	0.157454	0.548091	0.0813402	0.0691039	0.00953617	0.871003	0.0503568	0.109794	0.138373	0.67376
765	30321.7	0	2.18679	2.18728	-27588.2	2734.1	Standard of care	0.013159	0.439413	30321.7	0.443946	60.151	0.0247214	0.111555	0.116363	0.772082	0.271266	0.0247745	0.703959	0.0323205	0.0189971	0.948682	0.0275246	0.0916017	0.880874	0.320042	0.740163	0.123541	0.519915	0.0327282	0.0327545	0.444029	0.439774	0.839765	0.0975372	0.114251	0.76779	0.117959	0.229202	0.127885	0.509413	0.133499	0.0699159	0.0168253	0.890468	0.0227904	0.123885	0.0923528	0.725372
766	32209.4	0	1.34432	1.34223	-30529	1677.78	Standard of care	0.00831545	0.439834	32209.4	0.410382	61.5574	0.0323664	0.0166971	0.112721	0.870582	0.315813	0.0556958	0.628491	0.0565556	0.0240999	0.919345	0.016548	0.0678535	0.915599	0.358736	0.662513	0.133616	0.493301	0.0201124	0.0200897	0.410499	0.440065	0.742987	0.169383	0.0977693	0.760217	0.142014	0.25716	0.132043	0.464959	0.145838	0.0625615	0.00318472	0.920462	0.0137916	0.163405	0.0759258	0.660799
767	28710.7	0	0.943864	0.948391	-27530.9	1185.49	Standard of care	0.0105788	0.424738	28710.7	0.471214	59.2354	0.0481848	0.0523223	0.181468	0.76621	0.310863	0.0294264	0.65971	0.0091879	0.0543814	0.936431	0.00872352	0.105258	0.886019	0.303288	0.603349	0.127208	0.462225	0.0140475	0.014134	0.471281	0.425256	0.76205	0.130979	0.0435847	0.820875	0.13554	0.301656	0.142111	0.460005	0.0962279	0.0396498	0.0055546	0.924797	0.0299985	0.174211	0.107327	0.646652
768	31049.7	0	3.57942	3.57908	-26575.4	4473.84	Standard of care	0.00905584	0.440512	31049.7	0.436136	60.7244	0.0267089	0.0316201	0.182272	0.786108	0.284091	0.0235048	0.692404	0.0133586	0.00844004	0.978201	0.0484631	0.115665	0.835872	0.327004	0.710998	0.123941	0.481995	0.0536192	0.0536305	0.436187	0.440932	0.814733	0.100375	0.0468117	0.854005	0.0991833	0.310813	0.155959	0.467089	0.0661389	0.0275058	0.000511839	0.897562	0.0744201	0.127868	0.0936064	0.725581
769	31790.7	0	2.36107	2.36288	-28839.3	2953.59	Standard of care	0.0104298	0.456831	31790.7	0.512605	56.7935	0.0393404	0.0228389	0.160892	0.816269	0.143892	0.0571254	0.798982	0.0443443	0.0251433	0.930512	0.0325296	0.0629811	0.904489	0.323574	0.53784	0.135115	0.459965	0.0353365	0.0353751	0.51272	0.457256	0.805452	0.0840722	0.0764944	0.804272	0.119234	0.267381	0.144572	0.461185	0.126862	0.0728018	0.00549819	0.861772	0.0599285	0.113346	0.0507971	0.735458
770	30285	0	1.94169	1.94004	-27857.9	2425.04	Standard of care	0.00870599	0.462621	30285	0.434998	62.2552	0.0401109	0.0627054	0.165287	0.772008	0.260251	0.08442	0.655329	0.0305808	0.0173004	0.952119	0.0246403	0.0904803	0.884879	0.340259	0.59824	0.129376	0.441967	0.0290433	0.0290309	0.435158	0.462997	0.759519	0.126985	0.14984	0.68994	0.16022	0.268002	0.131	0.521886	0.0791125	0.0308055	0.000348059	0.93169	0.0371566	0.157185	0.08592	0.668837
771	31175.5	0	3.73057	3.74111	-26512.3	4676.39	Standard of care	0.00796166	0.41346	31175.5	0.567679	58.3777	0.0184208	0.0625693	0.15345	0.783981	0.307742	0.0369051	0.655352	0.0434144	0.0473078	0.909278	0.0526035	0.0699219	0.877475	0.34509	0.817498	0.128287	0.489631	0.0559089	0.0560783	0.567733	0.413778	0.855675	0.102612	0.0845747	0.782735	0.132691	0.209857	0.177442	0.46548	0.147221	0.0384137	0.00160347	0.928597	0.0313861	0.156612	0.0682479	0.650608
772	29604.7	0	1.7769	1.7759	-27383.6	2219.87	Standard of care	0.0139895	0.447678	29604.7	0.437704	59.4764	0.0365316	0.0525165	0.0897788	0.857705	0.238353	0.0527249	0.708922	0.0241266	0.0172613	0.958612	0.0231622	0.0581281	0.91871	0.317628	0.64104	0.139455	0.497935	0.0265839	0.0265822	0.437882	0.447978	0.836072	0.113506	0.0837103	0.768688	0.147601	0.297478	0.252302	0.349845	0.100376	0.0402858	4.03231e-06	0.904736	0.0549741	0.107114	0.087242	0.704914
773	28641.9	0	2.22271	2.22517	-25863.5	2781.46	Standard of care	0.0145136	0.410832	28641.9	0.443184	60.876	0.0090844	0.0341711	0.141156	0.824673	0.202497	0.0673158	0.730187	0.0399116	0.0468141	0.913274	0.0299808	0.0620136	0.908006	0.381393	0.875962	0.130643	0.481354	0.0332437	0.0332946	0.443412	0.411376	0.813701	0.134958	0.109478	0.757568	0.132954	0.211264	0.190968	0.441052	0.156716	0.100962	0.000606554	0.878255	0.0201769	0.125254	0.093352	0.699459
774	31263.6	0	1.21341	1.21381	-29746.8	1517.26	Standard of care	0.0144819	0.425811	31263.6	0.429575	62.8288	0.029491	0.0604255	0.173326	0.766248	0.301508	0.0660394	0.632453	0.0862911	0.0211923	0.892517	0.0138856	0.0600845	0.92603	0.392967	0.848143	0.140064	0.500325	0.0180876	0.0181062	0.42981	0.42643	0.8597	0.105311	0.0644227	0.843397	0.0921807	0.271584	0.119918	0.522313	0.0861853	0.0287209	0.000419666	0.912265	0.0585949	0.109531	0.0783221	0.695377
775	30530.2	0	1.39366	1.39315	-28788.1	1741.44	Standard of care	0.0146336	0.458194	30530.2	0.451771	63.5695	0.00805221	0.0997777	0.146353	0.753869	0.182073	0.040496	0.777431	0.0230228	0.0132299	0.963747	0.0168339	0.0660184	0.917148	0.372786	0.84125	0.128198	0.508023	0.0208157	0.0208235	0.451915	0.458692	0.843373	0.089823	0.0471179	0.762517	0.190365	0.221919	0.136074	0.518924	0.123083	0.0448448	0.0238852	0.89789	0.0333801	0.236141	0.143758	0.569029
776	31120.2	0	2.29268	2.29615	-28254.3	2870.18	Standard of care	0.00705064	0.412885	31120.2	0.479419	57.6082	0.029876	0.0763479	0.155344	0.768309	0.227519	0.0166785	0.755802	0.00592645	0.0095117	0.984562	0.0303099	0.0868323	0.882858	0.359477	0.642971	0.129182	0.501785	0.0343416	0.0344042	0.479446	0.413164	0.837197	0.0970447	0.0699705	0.813348	0.116682	0.2448	0.240002	0.390835	0.124363	0.0360118	0.00348005	0.894707	0.065801	0.132419	0.0708872	0.717846
777	32097.2	0	2.90908	2.91065	-28460.8	3638.31	Standard of care	0.0227872	0.429056	32097.2	0.436731	63.0942	0.0568824	0.0267864	0.166322	0.806892	0.322862	0.0332741	0.643864	0.0292778	0.0175367	0.953185	0.0391922	0.0689748	0.891833	0.412344	0.846932	0.133287	0.457761	0.0434633	0.0435114	0.436901	0.430073	0.763346	0.161169	0.0451192	0.747941	0.20694	0.324092	0.125613	0.433934	0.116361	0.0312042	0.000612594	0.939511	0.0286726	0.162781	0.0896672	0.675125
778	31701	0	1.00253	1.00142	-30447.9	1251.78	Standard of care	0.00952872	0.43297	31701	0.401581	62.411	0.0303422	0.0500169	0.172365	0.777618	0.163352	0.0158943	0.820753	0.0497306	0.0175657	0.932704	0.01006	0.102872	0.887068	0.3177	0.757066	0.131162	0.490407	0.0149588	0.014956	0.40162	0.433382	0.786535	0.0832794	0.0832784	0.860131	0.0565909	0.295322	0.161157	0.46922	0.0743009	0.0527393	0.000239447	0.840068	0.106954	0.135404	0.100985	0.652997
779	30812.5	0	0.41888	0.41925	-30288.9	524.063	Standard of care	0.00914627	0.487261	30812.5	0.494267	57.841	0.0317233	0.0292423	0.194512	0.776246	0.21682	0.0365655	0.746614	0.033447	0.013538	0.953015	0.00303704	0.0614288	0.935534	0.342123	0.817652	0.133732	0.470061	0.00620369	0.00621899	0.494336	0.487679	0.746578	0.150772	0.0642529	0.827019	0.108728	0.280666	0.162897	0.459001	0.0974365	0.0832568	4.88544e-05	0.884335	0.032359	0.166152	0.0665022	0.677152
780	29682.4	0	1.09672	1.09579	-28311.5	1369.74	Standard of care	0.00520547	0.413287	29682.4	0.383159	56.4061	0.0434893	0.0575062	0.140287	0.802207	0.219231	0.0178114	0.762958	0.0194706	0.00992077	0.970609	0.0134394	0.0622061	0.924354	0.359999	0.55232	0.138867	0.445561	0.0164125	0.016403	0.383181	0.413492	0.80368	0.101563	0.0916549	0.782824	0.125521	0.259542	0.176359	0.452224	0.111875	0.0220757	1.21538e-05	0.959881	0.0180313	0.140446	0.102232	0.70697
781	31324	0	2.21193	2.21558	-28559.1	2769.48	Standard of care	0.0116658	0.438519	31324	0.47923	57.4528	0.0470041	0.0310864	0.191591	0.777323	0.248844	0.0574356	0.69372	0.0242532	0.0277811	0.947966	0.0274748	0.119812	0.852714	0.347663	0.559425	0.125851	0.512389	0.033059	0.0331372	0.479387	0.439054	0.843217	0.0742831	0.0997137	0.787716	0.11257	0.328646	0.127281	0.431699	0.112374	0.0509154	5.89005e-05	0.902588	0.0464375	0.135606	0.114278	0.640193
782	29234.4	0	3.17785	3.17656	-25262.1	3970.71	Standard of care	0.0111	0.466597	29234.4	0.440227	57.7663	0.0296073	0.0399303	0.0970454	0.863024	0.192264	0.0381955	0.769541	0.0537767	0.0539738	0.892249	0.0425277	0.113025	0.844447	0.384829	0.813342	0.142024	0.480564	0.0475971	0.0475975	0.440325	0.466853	0.869311	0.0768445	0.0914911	0.780215	0.128294	0.342827	0.208221	0.343536	0.105416	0.0194948	3.6712e-06	0.961136	0.0193652	0.155848	0.0526118	0.704198
783	30711.3	0	0.901038	0.898766	-29585	1123.46	Standard of care	0.018191	0.455418	30711.3	0.433513	54.8994	0.0337682	0.0271496	0.133004	0.839847	0.208623	0.0194576	0.771919	0.0208405	0.00879306	0.970366	0.00892466	0.081414	0.909661	0.405413	0.558271	0.132831	0.455518	0.0133983	0.013388	0.433592	0.456041	0.79819	0.120102	0.0574345	0.793548	0.149017	0.324059	0.211655	0.409903	0.054383	0.034577	0.00110201	0.923177	0.0411445	0.165689	0.0690528	0.628586
784	28305.8	0	3.16527	3.16356	-24349.3	3954.45	Standard of care	0.00780451	0.480715	28305.8	0.444396	56.748	0.039648	0.0643476	0.136877	0.798775	0.228158	0.10288	0.668962	0.0457596	0.0255481	0.928692	0.0438467	0.0758377	0.880316	0.322426	0.804017	0.135667	0.486396	0.0474204	0.0474046	0.444583	0.480962	0.83494	0.0827807	0.077845	0.761471	0.160684	0.330023	0.191256	0.355032	0.123689	0.0586066	0.00409913	0.898113	0.0391808	0.149919	0.0721196	0.678495
785	30564.5	0	1.56142	1.56406	-28612.8	1955.07	Standard of care	0.00756084	0.438577	30564.5	0.479133	59.1821	0.010103	0.0367437	0.142092	0.821164	0.283401	0.0347463	0.681852	0.0256438	0.053526	0.92083	0.0201004	0.0655447	0.914355	0.386244	0.540451	0.131491	0.503591	0.0233739	0.0234221	0.479192	0.438837	0.822014	0.107988	0.082814	0.754464	0.162722	0.186486	0.159455	0.530155	0.123904	0.0795549	3.64195e-05	0.888669	0.0317393	0.245141	0.0919015	0.594148
786	31595.9	0	4.36412	4.36515	-26140.7	5456.44	Standard of care	0.0155946	0.440267	31595.9	0.447603	58.1322	0.0333368	0.061914	0.170183	0.767903	0.289351	0.0180198	0.692629	0.0119723	0.0475827	0.940445	0.0614656	0.0758527	0.862682	0.410184	0.747684	0.123696	0.492192	0.0653545	0.0653885	0.447669	0.440928	0.815517	0.134019	0.0810389	0.767105	0.151856	0.180795	0.12891	0.498864	0.191431	0.063913	0.00765039	0.894206	0.0342305	0.11528	0.112354	0.72047
787	27682.1	0	1.25577	1.25407	-26112.4	1567.59	Standard of care	0.0160886	0.451011	27682.1	0.434767	57.9016	0.0501584	0.0543809	0.176521	0.769098	0.249626	0.0312281	0.719146	0.0379918	0.00627439	0.955734	0.0153821	0.0476657	0.936952	0.311918	0.591464	0.142961	0.458835	0.0187176	0.0187039	0.434879	0.451734	0.805382	0.111776	0.0628476	0.805833	0.13132	0.254216	0.142013	0.499123	0.104648	0.0415047	0.00151834	0.932308	0.0246688	0.152364	0.103819	0.671345
788	27916.2	0	1.61646	1.61808	-25895.6	2022.59	Standard of care	0.0084112	0.437342	27916.2	0.464386	57.1928	0.0462365	0.0927003	0.118614	0.788686	0.236482	0.0172814	0.746237	0.0246967	0.0265227	0.948781	0.0204256	0.0726373	0.906937	0.38644	0.725384	0.135552	0.505407	0.0241933	0.0242277	0.46442	0.437582	0.746219	0.134298	0.118669	0.796061	0.0852701	0.305692	0.190679	0.435931	0.0676977	0.0421095	0.00384784	0.866366	0.0876771	0.118671	0.142938	0.687201
789	29128.6	0	2.43536	2.44478	-26084.4	3055.98	Standard of care	0.0161934	0.399951	29128.6	0.520628	58.5225	0.0514987	0.0776924	0.13041	0.791898	0.163122	0.0263661	0.810512	0.0130841	0.0254282	0.961488	0.0336093	0.0504914	0.915899	0.330604	0.660278	0.120038	0.483234	0.0364363	0.0365929	0.520715	0.400528	0.850379	0.0781202	0.120954	0.776964	0.102082	0.177644	0.145309	0.590715	0.0863327	0.0422367	0.0025807	0.907072	0.0481108	0.103962	0.125295	0.696024
790	31478.9	0	2.72206	2.72472	-28076.3	3405.9	Standard of care	0.0080182	0.432312	31478.9	0.475788	59.983	0.0404212	0.0600289	0.142067	0.797904	0.241229	0.0180712	0.7407	0.0168786	0.0174654	0.965656	0.0378791	0.0592662	0.902855	0.336515	0.609188	0.136763	0.512574	0.0407845	0.0408327	0.475821	0.432584	0.830368	0.136688	0.0667442	0.823115	0.110141	0.232086	0.134115	0.53487	0.0989283	0.0559384	0.000143004	0.856435	0.0874839	0.162578	0.0574313	0.664024
791	28485.8	0	1.01902	1.01625	-27212	1270.32	Standard of care	0.0150649	0.469886	28485.8	0.442245	61.9504	0.0199452	0.097323	0.164314	0.738363	0.231502	0.0270463	0.741451	0.0169127	0.0310456	0.952042	0.010367	0.0790334	0.9106	0.347934	0.780167	0.122382	0.467329	0.0151728	0.0151493	0.442338	0.470499	0.743342	0.145284	0.0940775	0.7764	0.129523	0.24743	0.178751	0.476703	0.0971158	0.0640642	0.000487747	0.893977	0.0414707	0.184111	0.0550859	0.684129
792	29678.5	0	3.66535	3.67363	-25096.8	4592.04	Standard of care	0.0129898	0.407447	29678.5	0.486283	60.0183	0.0480833	0.106339	0.188666	0.704996	0.294107	0.0124038	0.69349	0.0379191	0.0637941	0.898287	0.047919	0.141731	0.81035	0.394463	0.686069	0.133747	0.482165	0.0548444	0.0549995	0.486318	0.408099	0.81634	0.126612	0.130029	0.750406	0.119565	0.312498	0.146466	0.410341	0.130695	0.0855107	0.00461732	0.850452	0.0594198	0.126005	0.0962798	0.721652
793	29647.6	0	2.4275	2.42616	-26613.2	3032.7	Standard of care	0.0114727	0.430924	29647.6	0.417959	56.9814	0.0272957	0.0549019	0.232254	0.712844	0.276944	0.0332559	0.6898	0.0144488	0.0241875	0.961364	0.032905	0.0611582	0.905937	0.38217	0.729145	0.128251	0.513288	0.036317	0.0363071	0.418059	0.431567	0.841563	0.0938204	0.0741598	0.843418	0.0824217	0.200164	0.15314	0.507539	0.139157	0.0389454	0.000184987	0.943323	0.0175466	0.194469	0.0266365	0.666389
794	30232.9	0	2.70435	2.71459	-26852.4	3393.24	Standard of care	0.0153632	0.429087	30232.9	0.537865	60.2941	0.0560375	0.0389414	0.183469	0.77759	0.212687	0.0831156	0.704197	0.0138402	0.0122683	0.973892	0.0374145	0.0619995	0.900586	0.391144	0.610037	0.136085	0.453355	0.0404299	0.0405985	0.538096	0.429847	0.838327	0.12184	0.0746385	0.800218	0.125143	0.230496	0.142643	0.4758	0.151061	0.0591706	0.0033052	0.92166	0.0158645	0.191346	0.0913061	0.652171
795	31894.8	0	1.39301	1.39916	-30153.6	1748.94	Standard of care	0.019732	0.409011	31894.8	0.475649	55.8968	0.0474818	0.108671	0.210215	0.681115	0.163441	0.0672805	0.769278	0.0100214	0.0352678	0.954711	0.0151402	0.0951796	0.88968	0.33223	0.604271	0.119871	0.453245	0.0206909	0.0208115	0.475927	0.41019	0.876196	0.076997	0.0678268	0.774911	0.157262	0.247413	0.223395	0.444742	0.0844499	0.0360142	0.000870615	0.917781	0.0453339	0.166088	0.151812	0.619863
796	29934.7	0	7.17353	7.17685	-20967.8	8971.07	Standard of care	0.012961	0.39646	29934.7	0.440747	55.4275	0.0357923	0.0939567	0.172254	0.73379	0.227183	0.0426515	0.730165	0.0274835	0.0071624	0.965354	0.105591	0.0449752	0.849434	0.400011	0.469097	0.130091	0.43076	0.10753	0.107588	0.440862	0.397127	0.766288	0.0850036	0.0777881	0.831888	0.0903237	0.268603	0.144559	0.417813	0.169025	0.0490556	0.00724079	0.915372	0.0283313	0.142094	0.136571	0.687217
797	30767.8	0	1.41103	1.42369	-29004	1779.61	Standard of care	0.0184423	0.43969	30767.8	0.540551	59.6511	0.00692379	0.0829895	0.0867546	0.830256	0.225616	0.0330553	0.741329	0.0186547	0.018353	0.962992	0.0157453	0.0937735	0.890481	0.356721	0.761003	0.141655	0.493128	0.0210706	0.0212941	0.54067	0.44008	0.820634	0.120069	0.114776	0.754204	0.13102	0.294436	0.185746	0.380042	0.139776	0.0645776	0.00374375	0.881105	0.0505733	0.146717	0.105232	0.657705
798	30388.6	0	1.95362	1.958	-27946.6	2447.5	Standard of care	0.00801955	0.425279	30388.6	0.474926	62.3685	0.0210043	0.0530872	0.156357	0.790556	0.388272	0.0659926	0.545736	0.0319348	0.0342901	0.933775	0.0256445	0.067666	0.90669	0.360482	0.566014	0.135213	0.461716	0.0292438	0.0293182	0.475037	0.425614	0.85933	0.0730239	0.0809564	0.771535	0.147508	0.278236	0.130636	0.513681	0.0774464	0.0273225	0.00550795	0.899299	0.0678706	0.151625	0.0512641	0.662802
799	30128.9	0	1.5882	1.58388	-28143.7	1979.85	Standard of care	0.0104137	0.472043	30128.9	0.418111	61.9759	0.016317	0.0689092	0.155512	0.775579	0.261307	0.0922715	0.646421	0.0279477	0.0251375	0.946915	0.0202817	0.0606321	0.919086	0.353708	0.597811	0.125384	0.486904	0.0237457	0.0236912	0.418349	0.472426	0.822015	0.128512	0.0727886	0.766791	0.16042	0.22367	0.132581	0.527163	0.116586	0.0325513	0.00154717	0.937723	0.0281782	0.0871539	0.0553553	0.782236
800	28856.3	0	0.543258	0.540713	-28177.2	675.891	Standard of care	0.00688691	0.446199	28856.3	0.402805	62.7504	0.032715	0.0849371	0.159626	0.755437	0.301446	0.024315	0.674239	0.0254189	0.0215702	0.953011	0.00479001	0.0591257	0.936084	0.361582	0.881606	0.129815	0.463744	0.0080965	0.00806403	0.402845	0.446483	0.78494	0.105316	0.0658331	0.838421	0.0957462	0.283586	0.183125	0.430396	0.102893	0.0442336	0.000351285	0.916978	0.0384366	0.11847	0.0592705	0.73631
801	29136.3	0	2.27352	2.27589	-26294.4	2844.87	Standard of care	0.0174889	0.461708	29136.3	0.485256	59.0185	0.0220415	0.0427096	0.20409	0.753201	0.209866	0.0547441	0.73539	0.0381659	0.00517086	0.956663	0.0298399	0.0777544	0.892406	0.322773	0.472761	0.127975	0.496652	0.0339575	0.0340157	0.48547	0.462551	0.872146	0.0914633	0.107586	0.778283	0.114131	0.318424	0.137546	0.434743	0.109286	0.062206	0.00616167	0.894623	0.0370098	0.107142	0.0919962	0.670474
802	30058.3	0	1.39656	1.40165	-28312.6	1752.06	Standard of care	0.0123627	0.448597	30058.3	0.495146	57.3076	0.0325835	0.0405815	0.189105	0.770314	0.300007	0.0606219	0.639371	0.0225014	0.0183391	0.959159	0.0169935	0.0696232	0.913383	0.307963	0.710046	0.13088	0.475321	0.0208419	0.0209326	0.495302	0.449184	0.806477	0.119609	0.127167	0.717419	0.155414	0.271774	0.224266	0.406522	0.0974379	0.0263776	0.00164335	0.911551	0.060428	0.146904	0.085049	0.710524
803	30708.9	0	4.32778	4.33143	-25299.2	5414.29	Standard of care	0.0152868	0.395809	30708.9	0.452455	55.9452	0.0485368	0.0521035	0.140122	0.807774	0.233358	0.0338159	0.732826	0.105522	0.00574936	0.888728	0.0607146	0.0813974	0.857888	0.379814	0.822382	0.12057	0.490748	0.0648228	0.0648965	0.452577	0.396389	0.812697	0.115817	0.0629848	0.834778	0.102237	0.307835	0.128906	0.452195	0.111064	0.054835	0.00163577	0.926995	0.0165339	0.13566	0.0714435	0.724419
804	30754.8	0	2.03742	2.03168	-28208	2539.6	Standard of care	0.0105321	0.477398	30754.8	0.427564	57.7857	0.0198426	0.0680168	0.0993643	0.832619	0.364863	0.0502266	0.58491	0.0282372	0.0143278	0.957435	0.0271089	0.0536978	0.919193	0.29176	0.907802	0.132037	0.484978	0.0305126	0.030436	0.427691	0.477642	0.830522	0.120653	0.0852189	0.796868	0.117913	0.26876	0.141778	0.477429	0.112033	0.0358057	0.000455611	0.897191	0.0665474	0.142964	0.111713	0.703802
805	29044.9	0	1.79774	1.79997	-26797.7	2249.97	Standard of care	0.0141156	0.434931	29044.9	0.461246	59.0437	0.0386916	0.0616301	0.230444	0.707926	0.194985	0.0402681	0.764747	0.016325	0.00833008	0.975345	0.0236531	0.0561668	0.92018	0.355947	0.796012	0.134181	0.500531	0.0268423	0.0268881	0.461379	0.435725	0.767192	0.113735	0.0481378	0.832986	0.118876	0.225771	0.156493	0.492284	0.125452	0.039209	8.85519e-07	0.934632	0.0261578	0.183721	0.0687053	0.650414
806	30602.4	0	2.09387	2.09673	-27985.1	2620.92	Standard of care	0.0188996	0.449121	30602.4	0.479296	58.4329	0.0405221	0.0357398	0.149674	0.814587	0.177428	0.0611744	0.761398	0.0181802	0.0158926	0.965927	0.0260813	0.108534	0.865384	0.409273	0.604589	0.12013	0.467767	0.0312512	0.0313292	0.479544	0.449851	0.85198	0.0728918	0.138067	0.751568	0.110365	0.248314	0.183612	0.405838	0.162236	0.0639229	0.000994337	0.864437	0.0706456	0.157195	0.102798	0.668651
807	29903.8	0	1.26725	1.26705	-28319.7	1583.81	Standard of care	0.00813643	0.480131	29903.8	0.476282	55.718	0.0418819	0.0720299	0.138847	0.789123	0.232288	0.0704013	0.697311	0.0400179	0.021096	0.938886	0.0151746	0.0742517	0.910574	0.408425	0.650955	0.126443	0.491107	0.0189448	0.018952	0.476411	0.480392	0.80422	0.117368	0.0561812	0.824071	0.119748	0.34588	0.115398	0.416266	0.122456	0.0444194	0.0271483	0.884657	0.0437754	0.179076	0.0713645	0.666931
808	28302.8	0	2.43031	2.42781	-25264.9	3034.76	Standard of care	0.0088205	0.456447	28302.8	0.422723	56.3872	0.0520353	0.0394995	0.211446	0.749054	0.27888	0.0505588	0.670561	0.0190123	0.0245441	0.956444	0.0316663	0.0996831	0.868651	0.371677	0.829833	0.135831	0.484499	0.036361	0.0363366	0.422831	0.456899	0.840569	0.105436	0.0993238	0.762606	0.13807	0.303476	0.116929	0.458897	0.120698	0.0417606	0.0144201	0.886187	0.0576319	0.135792	0.0988803	0.701777
809	31658	0	3.10937	3.10916	-27771.3	3886.45	Standard of care	0.00732009	0.405998	31658	0.399005	61.9389	0.0439995	0.0513847	0.139616	0.808999	0.171937	0.0356579	0.792406	0.042179	0.0459405	0.91188	0.0440425	0.0552516	0.900706	0.412206	0.738528	0.143269	0.4717	0.0465944	0.0465969	0.399069	0.406273	0.860162	0.0671068	0.11861	0.793474	0.0879156	0.294189	0.145477	0.455708	0.104626	0.0250348	0.00263123	0.860274	0.11206	0.176505	0.0922474	0.693013
810	30025.4	0	2.85435	2.85201	-26457.5	3565.01	Standard of care	0.0101283	0.466321	30025.4	0.43201	57.285	0.0145068	0.0376193	0.12948	0.8329	0.288204	0.0363518	0.675444	0.0707684	0.00289505	0.926337	0.0392845	0.0676879	0.893028	0.40322	0.543661	0.127803	0.461303	0.042763	0.0427389	0.432094	0.46665	0.849118	0.0836333	0.0616018	0.787249	0.151149	0.204156	0.177316	0.448246	0.170282	0.0344716	0.0021971	0.93736	0.0259712	0.151881	0.0936235	0.649033
811	28413.4	0	3.37674	3.37761	-24192.4	4222.01	Standard of care	0.0106003	0.403846	28413.4	0.42053	57.8529	0.0442289	0.0478772	0.19948	0.752643	0.181964	0.0356458	0.78239	0.018216	0.0143951	0.967389	0.0476433	0.063878	0.888479	0.380274	0.703512	0.134112	0.444525	0.0505639	0.0505866	0.420615	0.404452	0.795745	0.116389	0.057027	0.809742	0.133231	0.260419	0.19867	0.451718	0.0891936	0.0320383	0.00642217	0.909304	0.0522357	0.227776	0.0669189	0.630866
812	30768.2	0	1.48338	1.48444	-28914	1855.55	Standard of care	0.014809	0.442051	30768.2	0.451902	56.4611	0.0270635	0.0410761	0.145052	0.813871	0.224052	0.0343423	0.741606	0.0218404	0.0251638	0.952996	0.0175497	0.086476	0.895974	0.301725	0.665866	0.141048	0.538734	0.0221513	0.0221883	0.452031	0.442526	0.815456	0.140499	0.11483	0.792256	0.0929137	0.310527	0.117901	0.435083	0.136489	0.0682669	0.0019014	0.879557	0.0502747	0.0970502	0.0907987	0.757721
813	31545.7	0	3.02497	3.02888	-27764.5	3786.09	Standard of care	0.00934066	0.397369	31545.7	0.493346	60.2179	0.0382453	0.0389955	0.0815441	0.87946	0.184147	0.0389607	0.776893	0.0486824	0.00992839	0.941389	0.0388242	0.150201	0.810975	0.413289	0.839711	0.138625	0.479377	0.0453043	0.045388	0.493422	0.397575	0.853504	0.0890649	0.0751104	0.789649	0.135241	0.34695	0.206181	0.337876	0.108992	0.0360269	0.00421367	0.904643	0.0551167	0.170601	0.0662375	0.703382
814	28973.5	0	2.51218	2.51667	-25833.3	3145.83	Standard of care	0.0171803	0.440238	28973.5	0.481576	61.6676	0.034721	0.0299086	0.197044	0.773047	0.191822	0.0907783	0.7174	0.00520261	0.0103584	0.984439	0.0345012	0.0613048	0.904194	0.305594	0.693578	0.134936	0.495052	0.037534	0.0376178	0.481923	0.441066	0.817163	0.103323	0.0757648	0.798671	0.125564	0.342668	0.118151	0.449434	0.0897461	0.0381826	0.00908672	0.934835	0.0178961	0.178426	0.0936036	0.644782
815	30654.6	0	1.01342	1.01914	-29387.8	1273.93	Standard of care	0.01284	0.442963	30654.6	0.498802	59.2002	0.011764	0.055018	0.112141	0.832841	0.293489	0.0507591	0.655752	0.0338211	0.0324651	0.933714	0.0100902	0.0934746	0.896435	0.310043	0.858238	0.117728	0.460678	0.0151182	0.0152252	0.498935	0.443345	0.869845	0.0582484	0.0512774	0.784487	0.164236	0.319352	0.123178	0.459051	0.0984195	0.0594575	3.1019e-05	0.905583	0.0349283	0.125048	0.0483442	0.781464
816	32301.8	0	2.93669	2.93294	-28631	3666.17	Standard of care	0.0115941	0.444636	32301.8	0.397929	59.6402	0.0387484	0.0551221	0.194477	0.750401	0.234995	0.0679403	0.697065	0.0251915	0.0252493	0.949559	0.0381804	0.122772	0.839048	0.362625	0.861531	0.123321	0.492709	0.0439354	0.0438994	0.398134	0.445193	0.865591	0.0873688	0.127275	0.718875	0.15385	0.248175	0.190874	0.449494	0.111457	0.0531355	0.000342472	0.907208	0.039314	0.174006	0.0906429	0.641469
817	28632.6	0	0.959849	0.963708	-27432.8	1204.64	Standard of care	0.0102938	0.407535	28632.6	0.445	59.4965	0.00983908	0.0492469	0.147012	0.803742	0.304832	0.0434402	0.651728	0.0166377	0.0480841	0.935278	0.00905699	0.102086	0.888857	0.358487	0.536702	0.132914	0.523678	0.0143222	0.0143969	0.445113	0.407906	0.791602	0.0974438	0.0550366	0.790545	0.154418	0.244023	0.173323	0.470849	0.111805	0.0606391	0.000752181	0.909191	0.0294178	0.190184	0.044821	0.66077
818	30103.2	0	1.13412	1.13513	-28685.6	1418.92	Standard of care	0.013263	0.436077	30103.2	0.443659	59.9267	0.0449138	0.0691631	0.122251	0.808586	0.319117	0.0136971	0.667186	0.0100646	0.0425829	0.947352	0.00876373	0.161666	0.82957	0.349947	0.874965	0.132895	0.496989	0.0168905	0.0169401	0.443703	0.436475	0.836509	0.115611	0.0622658	0.857734	0.0800006	0.185793	0.233271	0.465094	0.115841	0.0420053	0.0221116	0.898851	0.037032	0.145317	0.0651753	0.693798
819	30884.3	0	5.66803	5.66824	-23799.3	7085.3	Standard of care	0.0117382	0.438122	30884.3	0.44027	58.1414	0.00869137	0.0504992	0.170203	0.779298	0.268559	0.0369975	0.694444	0.0299082	0.0251668	0.944925	0.0823061	0.0574258	0.860268	0.3841	0.764591	0.117599	0.515785	0.0849606	0.0849743	0.440381	0.438602	0.865485	0.0872525	0.10134	0.778347	0.120312	0.262307	0.153202	0.427308	0.157184	0.0125216	0.0198216	0.907451	0.0602061	0.270352	0.102584	0.578154
820	32253	0	2.85291	2.85355	-28686.9	3566.94	Standard of care	0.0109805	0.437241	32253	0.4447	56.3852	0.0158217	0.0392589	0.0714588	0.889282	0.259445	0.0401411	0.700414	0.0223903	0.00244209	0.975168	0.0407128	0.0354771	0.92381	0.385248	0.749478	0.125118	0.491331	0.0427643	0.0427805	0.444805	0.437437	0.83177	0.0948123	0.0482965	0.810869	0.140835	0.307298	0.119979	0.450148	0.122576	0.055991	0.00143804	0.887319	0.0552521	0.122745	0.116402	0.700249
821	29123.1	0	1.72025	1.72089	-26972.8	2151.12	Standard of care	0.00770931	0.416774	29123.1	0.435305	57.6046	0.0281674	0.0464323	0.152761	0.800807	0.196397	0.0321523	0.771451	0.0538053	0.00291016	0.943285	0.0220107	0.0790869	0.898902	0.4011	0.621483	0.115997	0.471152	0.0257502	0.0257692	0.435363	0.417096	0.801109	0.0799659	0.0592946	0.832167	0.108538	0.259159	0.230361	0.4372	0.0732803	0.0577079	4.07756e-09	0.904546	0.0377464	0.22275	0.0523683	0.614403
822	30510.8	0	5.14464	5.14717	-24080	6433.96	Standard of care	0.0115998	0.423171	30510.8	0.457214	58.5767	0.0272716	0.0862766	0.17329	0.740434	0.225249	0.037758	0.736993	0.0136937	0.0297684	0.956538	0.0737038	0.0739764	0.85232	0.330683	0.389873	0.12342	0.454573	0.0770908	0.0771422	0.457309	0.423726	0.818038	0.0852818	0.0776598	0.708661	0.21368	0.22617	0.166903	0.471144	0.135783	0.0678491	0.00593852	0.891002	0.0352104	0.0985831	0.0511437	0.805923
823	28451.9	0	1.69309	1.69605	-26335.6	2120.06	Standard of care	0.0130753	0.46886	28451.9	0.489972	58.0418	0.016001	0.0379954	0.15161	0.810395	0.351072	0.0265414	0.622386	0.0142746	0.0542898	0.931436	0.0204436	0.0905894	0.888967	0.388613	0.725802	0.143634	0.48273	0.0252986	0.0253639	0.490045	0.469327	0.856414	0.0567085	0.134376	0.716066	0.149558	0.254213	0.139207	0.448848	0.157732	0.0403133	0.0221332	0.866765	0.0707883	0.182878	0.0360688	0.704722
824	31555	0	2.42056	2.42091	-28529.3	3026.13	Standard of care	0.00892981	0.468124	31555	0.474634	58.0012	0.0404045	0.0625341	0.164538	0.772928	0.223299	0.0498917	0.726809	0.0514182	0.02088	0.927702	0.029625	0.145332	0.825043	0.356401	0.761299	0.135154	0.520392	0.0362181	0.0362448	0.474739	0.468448	0.820384	0.0928918	0.129531	0.691812	0.178657	0.221144	0.14776	0.488349	0.142747	0.0463591	0.00834008	0.905101	0.0402003	0.147055	0.0405396	0.754319
825	30974.7	0	1.5621	1.5634	-29022	1954.26	Standard of care	0.0165117	0.429108	30974.7	0.438009	59.5174	0.0492899	0.0598387	0.14035	0.799811	0.302131	0.0422923	0.655576	0.0175664	0.00197836	0.980455	0.0194716	0.0560422	0.924486	0.304383	0.561309	0.127014	0.465492	0.0233252	0.0233594	0.438168	0.429726	0.747952	0.137562	0.0761775	0.756714	0.167108	0.317444	0.151782	0.409647	0.121127	0.0438882	0.000220127	0.936153	0.0197385	0.0551281	0.0744158	0.825053
826	29125.6	0	2.21471	2.21734	-26357.2	2771.67	Standard of care	0.0103264	0.413768	29125.6	0.451421	63.5884	0.04814	0.024951	0.10656	0.868489	0.242276	0.016815	0.740909	0.0279717	0.0178686	0.95416	0.0278177	0.11674	0.855443	0.40428	0.594196	0.133473	0.476397	0.0331437	0.0332035	0.45146	0.414061	0.868576	0.057198	0.0695617	0.716998	0.213441	0.231914	0.138839	0.478945	0.150302	0.0654562	0.00273937	0.891534	0.0402706	0.141572	0.0429821	0.705902
827	28586	0	1.99852	2.00222	-26087.8	2502.77	Standard of care	0.0120959	0.462381	28586	0.512218	58.9024	0.0472764	0.0252672	0.168052	0.806681	0.24427	0.0189728	0.736757	0.0247418	0.0144071	0.960851	0.027286	0.0510737	0.92164	0.341581	0.783353	0.13753	0.419242	0.0298873	0.029954	0.512259	0.462929	0.877068	0.0605143	0.0705393	0.815122	0.114339	0.20643	0.137183	0.513005	0.143382	0.0589139	0.00011526	0.902978	0.037993	0.110478	0.0775354	0.734264
828	30103.1	0	1.92162	1.92394	-27701.1	2404.92	Standard of care	0.0115698	0.416205	30103.1	0.453265	58.1046	0.0196362	0.0625519	0.137468	0.79998	0.23603	0.067962	0.696008	0.0639662	0.00668537	0.929348	0.0233633	0.108121	0.868515	0.32632	0.637452	0.139865	0.463812	0.028738	0.0287921	0.453436	0.416634	0.757199	0.142428	0.0821679	0.801894	0.115938	0.239654	0.164851	0.4412	0.154294	0.0238204	0.0062167	0.933646	0.0363168	0.125841	0.0320144	0.758429
829	30567.1	0	2.03603	2.04133	-28022.1	2551.67	Standard of care	0.0108581	0.432862	30567.1	0.496939	59.253	0.0404885	0.0444937	0.165309	0.790198	0.287904	0.0396414	0.672454	0.052762	0.00598886	0.941249	0.0259695	0.0886802	0.88535	0.363759	0.651782	0.137896	0.483813	0.0304523	0.0305482	0.497029	0.433315	0.8409	0.106676	0.0713707	0.749434	0.179196	0.24405	0.110205	0.469944	0.175802	0.124495	0.000818398	0.833125	0.0415624	0.12511	0.0662758	0.729667
830	31968.8	0	3.50973	3.507	-27581.6	4383.75	Standard of care	0.0153535	0.43296	31968.8	0.411852	63.9729	0.040682	0.0333313	0.132467	0.834202	0.318339	0.0394022	0.642259	0.0550807	0.0368471	0.908072	0.0489508	0.0622035	0.888846	0.376256	0.548014	0.134655	0.481535	0.0525522	0.0525252	0.412	0.433477	0.833015	0.121467	0.102117	0.724302	0.173582	0.190633	0.183109	0.541056	0.0852021	0.100635	0.00055934	0.817674	0.0811312	0.131794	0.0843913	0.693572
831	29159.7	0	4.63485	4.63771	-23366.1	5797.13	Standard of care	0.00925493	0.448376	29159.7	0.493361	60.2876	0.0413189	0.0283304	0.183475	0.788195	0.222907	0.0155271	0.761566	0.0106951	0.0198104	0.969495	0.0646221	0.116409	0.818969	0.389091	0.700119	0.120949	0.488852	0.0694435	0.0695056	0.493392	0.448797	0.811706	0.124445	0.0642558	0.771324	0.164421	0.216731	0.190533	0.484476	0.10826	0.0435665	0.000265628	0.91528	0.0408874	0.130921	0.0468588	0.75286
832	31763.4	0	2.0585	2.06182	-29190.3	2577.27	Standard of care	0.00924335	0.45684	31763.4	0.504082	54.9579	0.0523001	0.0655012	0.0950141	0.839485	0.247122	0.0513769	0.701502	0.0185172	0.00791634	0.973566	0.0254135	0.115616	0.858971	0.412584	0.731678	0.134401	0.495875	0.0308047	0.0308739	0.504183	0.457049	0.829707	0.0729281	0.0540182	0.746883	0.199099	0.236324	0.12362	0.530015	0.110041	0.0361891	0.00017339	0.934102	0.0295356	0.204022	0.0692557	0.599462
833	29768	0	1.98402	1.98668	-27287.9	2483.36	Standard of care	0.0161861	0.426208	29768	0.446134	57.4241	0.049232	0.0399209	0.146408	0.813671	0.283352	0.0326542	0.683994	0.0173484	0.0141017	0.96855	0.0262513	0.0550982	0.91865	0.297887	0.693162	0.122262	0.464554	0.0296557	0.0297099	0.446253	0.426847	0.840239	0.105433	0.0994012	0.787342	0.113257	0.274967	0.147439	0.48787	0.0897242	0.0184459	0.00389281	0.939994	0.0376676	0.102473	0.0519401	0.757264
834	30567.3	0	0.914291	0.919211	-29424.5	1149.01	Standard of care	0.01423	0.434483	30567.3	0.465769	64.0877	0.0392086	0.0399701	0.230296	0.729733	0.341633	0.0134377	0.644929	0.0049994	0.0142627	0.980738	0.00763594	0.109319	0.883045	0.291202	0.796181	0.128074	0.494805	0.013567	0.0136662	0.465813	0.435299	0.860564	0.070867	0.045508	0.845399	0.109093	0.330105	0.0974805	0.489111	0.0833042	0.0564514	0.00109456	0.911435	0.0310189	0.141836	0.0936989	0.647529
835	29095.9	0	1.22207	1.2235	-27568.3	1529.38	Standard of care	0.00490575	0.422342	29095.9	0.461009	58.0364	0.0503241	0.0224243	0.152088	0.825488	0.253339	0.0473815	0.699279	0.0101428	0.0184936	0.971364	0.0146747	0.0806476	0.904678	0.375524	0.833694	0.143938	0.463011	0.0182825	0.0183104	0.461059	0.42254	0.810775	0.0979506	0.104425	0.795176	0.1004	0.275424	0.163027	0.447282	0.114267	0.0564138	3.84441e-05	0.905722	0.037826	0.174395	0.0851864	0.657928
836	29437.6	0	1.26571	1.275	-27855.5	1593.75	Standard of care	0.00859131	0.415307	29437.6	0.534551	55.7239	0.0454808	0.0546864	0.136178	0.809135	0.299615	0.0222053	0.678179	0.0538029	0.0196544	0.926543	0.0163295	0.0425646	0.941106	0.324839	0.591263	0.129494	0.554306	0.0189383	0.0190846	0.534594	0.415573	0.84961	0.0714304	0.0298783	0.837004	0.133118	0.268019	0.169183	0.452859	0.109939	0.0430363	0.0107251	0.915263	0.0309753	0.158847	0.0793132	0.625907
837	29539.3	0	4.62266	4.63001	-23761	5787.51	Standard of care	0.00830003	0.434487	29539.3	0.539069	58.5904	0.0251422	0.0652072	0.0889852	0.845808	0.284261	0.0206401	0.695098	0.0289121	0.00408694	0.967001	0.0652467	0.0912762	0.843477	0.39036	0.68112	0.13372	0.497208	0.0693069	0.0694319	0.539103	0.434669	0.840075	0.108603	0.0772185	0.859936	0.0628451	0.266826	0.174394	0.467269	0.09151	0.0528235	0.00644644	0.903186	0.0375445	0.145168	0.0743073	0.677977
838	31222.6	0	0.998288	0.999295	-29974.7	1249.12	Standard of care	0.0129161	0.43039	31222.6	0.443446	62.1616	0.0393356	0.0749966	0.162086	0.762918	0.211293	0.0636851	0.725022	0.0312668	0.029325	0.939408	0.0101484	0.0862639	0.903588	0.321719	0.551836	0.12792	0.493834	0.0148633	0.0148955	0.443644	0.430917	0.848502	0.0960458	0.106091	0.770493	0.123416	0.265541	0.248742	0.333717	0.152	0.0312905	0.00391596	0.93269	0.0321034	0.10843	0.09587	0.749329
839	31686	0	3.88458	3.88651	-26830.3	4858.14	Standard of care	0.00640401	0.433514	31686	0.4772	56.8915	0.0168083	0.0588448	0.233871	0.707284	0.260131	0.0454219	0.694447	0.0529635	0.0258586	0.921178	0.0544026	0.0845947	0.861003	0.38748	0.809178	0.121612	0.49964	0.0582174	0.0582549	0.477267	0.433887	0.794527	0.113346	0.0581313	0.81035	0.131519	0.30986	0.132653	0.401471	0.156016	0.0326007	0.00636086	0.922402	0.0386364	0.15775	0.0943493	0.704289
840	29819.8	0	2.09264	2.09013	-27204	2612.67	Standard of care	0.00997111	0.484295	29819.8	0.452394	56.3789	0.0168825	0.022776	0.117498	0.859726	0.263029	0.0233024	0.713669	0.02976	0.000844399	0.969396	0.0291863	0.037924	0.93289	0.362125	0.540555	0.120475	0.505221	0.0313503	0.0313193	0.45245	0.484558	0.808768	0.115268	0.0782718	0.742927	0.178801	0.183868	0.106678	0.617115	0.0923397	0.0301437	0.00348079	0.906622	0.0597539	0.233663	0.0891499	0.637984
841	30081.6	0	1.58879	1.5818	-28095.6	1977.25	Standard of care	0.0123156	0.452742	30081.6	0.388554	55.4286	0.00837834	0.0445727	0.142813	0.812614	0.310054	0.0207692	0.669177	0.0273214	0.0352258	0.937453	0.0190755	0.0848518	0.896073	0.352845	0.621732	0.135687	0.472219	0.0237561	0.0236655	0.388618	0.453181	0.837001	0.11807	0.105979	0.768793	0.125228	0.287428	0.164237	0.409975	0.13836	0.0221453	0.000629478	0.952378	0.0248473	0.11853	0.0450388	0.73612
842	30048.7	0	2.54582	2.54061	-26866.4	3175.76	Standard of care	0.00911715	0.485952	30048.7	0.40731	57.3848	0.0410821	0.0537437	0.121241	0.825015	0.274541	0.0201928	0.705266	0.0451936	0.0486983	0.906108	0.0352017	0.0540643	0.910734	0.307173	0.560255	0.132898	0.4798	0.0381374	0.0380659	0.407355	0.486209	0.807905	0.153129	0.0529361	0.833657	0.113407	0.311832	0.144843	0.46702	0.0763052	0.0290431	0.0111111	0.924191	0.0356551	0.176054	0.0714267	0.687193
843	31678.8	0	0.858237	0.858416	-30606	1073.02	Standard of care	0.0106801	0.442603	31678.8	0.445641	60.5353	0.0225976	0.0446139	0.102208	0.853178	0.210805	0.0459279	0.743267	0.0313951	0.0294376	0.939167	0.00978147	0.0547901	0.935428	0.413069	0.444042	0.138702	0.459892	0.0128146	0.0128268	0.445748	0.442886	0.841066	0.10835	0.0496316	0.844722	0.105646	0.247379	0.182844	0.472777	0.0970003	0.0456445	0.000564911	0.937962	0.0158286	0.110312	0.0931108	0.739518
844	30493.8	0	1.11278	1.11089	-29102.8	1388.61	Standard of care	0.0114211	0.472532	30493.8	0.447602	58.2801	0.0463046	0.0696437	0.207474	0.722882	0.276613	0.0429073	0.68048	0.0757522	0.0146354	0.909612	0.0116645	0.0880963	0.900239	0.348398	0.794839	0.123602	0.49487	0.0165819	0.0165688	0.44772	0.473085	0.83606	0.126088	0.112331	0.768219	0.11945	0.231589	0.168883	0.477182	0.122346	0.0561175	0.00109825	0.915068	0.0277163	0.122356	0.0821316	0.713378
845	29384	0	4.11123	4.11292	-24245	5141.15	Standard of care	0.00756738	0.423071	29384	0.461842	61.3716	0.0209717	0.101047	0.167882	0.731071	0.206444	0.0719837	0.721572	0.00505666	0.0130866	0.981857	0.0582889	0.0725105	0.869201	0.297677	0.636821	0.125669	0.423299	0.0616159	0.0616495	0.46195	0.423441	0.821925	0.132796	0.0612951	0.818978	0.119727	0.261438	0.122085	0.461186	0.15529	0.0278941	0.00236364	0.935384	0.0343584	0.137082	0.0952725	0.688298
846	29042.6	0	0.556727	0.573472	-28346.7	716.841	Standard of care	0.01537	0.426682	29042.6	0.54975	57.3916	0.0189791	0.0430312	0.145167	0.811801	0.301921	0.0258214	0.672258	0.0308772	0.00903583	0.960087	0.00571952	0.0281617	0.966119	0.360531	0.647115	0.119568	0.488724	0.00826744	0.0085264	0.549827	0.427258	0.846458	0.0751789	0.133653	0.743883	0.122465	0.354342	0.103419	0.393062	0.149177	0.0466886	0.000250982	0.883672	0.069388	0.150411	0.058318	0.721876
847	30350.4	0	2.32018	2.32205	-27450.2	2902.56	Standard of care	0.00862456	0.466786	30350.4	0.497657	57.1722	0.0310534	0.0431891	0.137005	0.819806	0.254542	0.0317351	0.713723	0.00875506	0.011388	0.979857	0.0322767	0.0502547	0.917469	0.411512	0.719917	0.129766	0.426321	0.0347518	0.0347875	0.497708	0.467101	0.796246	0.128437	0.0707937	0.81939	0.109816	0.207678	0.163901	0.528715	0.0997061	0.0586708	0.00010918	0.907608	0.0336116	0.210211	0.0668059	0.616645
848	29660.5	0	1.41737	1.41796	-27888.8	1772.45	Standard of care	0.00794737	0.457445	29660.5	0.473692	59.3592	0.0127965	0.0961049	0.122962	0.780933	0.181492	0.0254714	0.793037	0.0475535	0.0296398	0.922807	0.0180514	0.0601767	0.921772	0.307225	0.463309	0.13136	0.50754	0.0212192	0.0212358	0.473739	0.457672	0.759198	0.153742	0.0912798	0.771348	0.137373	0.234946	0.162071	0.473823	0.12916	0.0879863	0.000327757	0.877631	0.0340553	0.173106	0.0448231	0.719351
849	31637.5	0	1.61674	1.61042	-29616.6	2013.03	Standard of care	0.0124015	0.467046	31637.5	0.39865	55.8949	0.0464331	0.0335774	0.19647	0.769953	0.2752	0.026943	0.697857	0.0167037	0.0584689	0.924827	0.019502	0.0907383	0.88976	0.296709	0.750413	0.124041	0.436892	0.02413	0.02405	0.398727	0.467687	0.818666	0.103989	0.0813658	0.854325	0.0643092	0.249118	0.134285	0.518532	0.0980653	0.0269444	0.00526838	0.916352	0.0514353	0.124122	0.0890855	0.713244
850	31113.7	0	2.38809	2.38739	-28128.6	2984.23	Standard of care	0.0089919	0.467384	31113.7	0.453602	59.2391	0.052249	0.0180859	0.20456	0.777354	0.197213	0.0422362	0.760551	0.0119272	0.0288453	0.959227	0.0334213	0.050544	0.916035	0.295781	0.575472	0.125799	0.459015	0.0357432	0.03574	0.453685	0.467848	0.803408	0.0867735	0.0467187	0.85282	0.100461	0.152626	0.183416	0.424405	0.239553	0.0320454	0.00177593	0.935659	0.0305198	0.155808	0.0705739	0.692598
851	30325.9	0	3.08998	3.0952	-26463.5	3869	Standard of care	0.00801009	0.402739	30325.9	0.497709	61.7825	0.0378923	0.0719038	0.147938	0.780158	0.241976	0.0512827	0.706742	0.0389042	0.0229618	0.938134	0.0414295	0.106068	0.852503	0.396253	0.880721	0.139818	0.504963	0.0462838	0.0463764	0.497798	0.403041	0.796741	0.0911576	0.0852492	0.810823	0.103928	0.289988	0.0921378	0.500422	0.117453	0.0416447	0.00657666	0.925433	0.0263456	0.203344	0.0478433	0.660055
852	29756.4	0	3.60843	3.61565	-25245.9	4519.57	Standard of care	0.0128601	0.413037	29756.4	0.498162	57.7711	0.0291713	0.0169355	0.11944	0.863624	0.236262	0.0403999	0.723339	0.0398408	0.0332809	0.926878	0.0493537	0.105948	0.844699	0.370098	0.642634	0.133215	0.505308	0.0540419	0.054175	0.498276	0.413424	0.792172	0.115073	0.101331	0.802109	0.0965592	0.235888	0.122543	0.567681	0.073889	0.0202854	0.00412919	0.888356	0.0872293	0.178867	0.0849309	0.661842
853	33022.2	0	2.87312	2.87218	-29430.8	3590.23	Standard of care	0.0144884	0.481447	33022.2	0.475545	57.1055	0.0289514	0.0177988	0.202374	0.779827	0.370649	0.0799435	0.549408	0.0420647	0.0426589	0.915276	0.0393871	0.0607888	0.899824	0.405213	0.838132	0.127528	0.497924	0.0429715	0.0429721	0.475809	0.482113	0.839556	0.0770534	0.0668293	0.718579	0.214592	0.248094	0.157241	0.53265	0.0620146	0.0162617	0.000393714	0.953702	0.0296422	0.13453	0.0543268	0.712939
854	28201.3	0	2.28077	2.28486	-25350.4	2856.07	Standard of care	0.0122073	0.421791	28201.3	0.460843	60.6784	0.0570811	0.0497498	0.132436	0.817814	0.285124	0.0319139	0.682962	0.0239967	0.0191608	0.956842	0.0288991	0.104675	0.866426	0.319758	0.618969	0.140638	0.493859	0.0341133	0.0341959	0.460932	0.422198	0.776774	0.119527	0.0982822	0.78087	0.120847	0.21035	0.249069	0.44187	0.0987106	0.031739	0.00917168	0.918668	0.0404211	0.177641	0.0767074	0.650402
855	32505.9	0	4.06117	4.06068	-27429.5	5075.86	Standard of care	0.0180686	0.440707	32505.9	0.434639	59.0369	0.0250132	0.0410799	0.185015	0.773905	0.1555	0.0730231	0.771477	0.0169328	0.0112647	0.971802	0.0567206	0.0951953	0.848084	0.344416	0.73094	0.115799	0.465306	0.0607672	0.0607867	0.434946	0.441591	0.803909	0.127777	0.0588432	0.817296	0.123861	0.193207	0.168362	0.532728	0.105703	0.0316059	0.00704569	0.925237	0.0361112	0.103254	0.0790019	0.739901
856	31915.2	0	1.55143	1.55317	-29975.9	1941.46	Standard of care	0.0104939	0.447885	31915.2	0.484109	61.104	0.0279476	0.0252516	0.148771	0.825977	0.196919	0.0195306	0.783551	0.0440699	0.0108784	0.945052	0.0203057	0.0584211	0.921273	0.385933	0.868952	0.123912	0.449334	0.0232035	0.0232403	0.48415	0.4483	0.848093	0.106153	0.0723144	0.772433	0.155252	0.290483	0.103275	0.400415	0.205827	0.0406311	0.00498722	0.926739	0.0276428	0.150552	0.071102	0.687579
857	30876.2	0	6.40137	6.40213	-22874.5	8002.67	Standard of care	0.0135814	0.445237	30876.2	0.453853	59.8092	0.0197354	0.0180432	0.184951	0.797005	0.245841	0.0512261	0.702933	0.0547914	0.00247241	0.942736	0.0929541	0.0742125	0.832833	0.30757	0.782163	0.145511	0.506566	0.0959343	0.0959619	0.454017	0.445825	0.821377	0.10013	0.121992	0.76453	0.113479	0.234263	0.155896	0.505185	0.104655	0.0607631	0.00137952	0.910885	0.0269725	0.183018	0.100909	0.635393
858	31750.2	0	1.28063	1.27558	-30149.4	1594.47	Standard of care	0.0152947	0.466704	31750.2	0.414454	61.3477	0.0245638	0.0296102	0.11641	0.85398	0.223123	0.0226005	0.754277	0.0211556	0.0050957	0.973749	0.0157604	0.0581526	0.926087	0.413914	0.572824	0.140556	0.468339	0.0191299	0.0190682	0.414536	0.467138	0.779964	0.124249	0.0887199	0.818254	0.0930263	0.209042	0.216941	0.450034	0.123983	0.00965563	0.000199086	0.956025	0.0341198	0.124285	0.0755918	0.646996
859	29142.6	0	3.74116	3.74705	-24466.2	4683.82	Standard of care	0.0160231	0.477287	29142.6	0.5289	61.2213	0.0406225	0.0475599	0.190613	0.761827	0.24083	0.0362402	0.72293	0.0113498	0.0140648	0.974585	0.0527604	0.0682446	0.878995	0.309902	0.588433	0.122025	0.464398	0.05599	0.0560984	0.529011	0.478037	0.819362	0.0652783	0.062891	0.780613	0.156496	0.241307	0.191342	0.506819	0.0605314	0.0218104	2.54499e-05	0.937658	0.0405064	0.109127	0.039675	0.734001
860	30799.1	0	4.17481	4.17846	-25580.6	5223.08	Standard of care	0.0111588	0.409105	30799.1	0.448633	58.0359	0.0298214	0.0634051	0.207973	0.728622	0.298071	0.0328524	0.669077	0.0427117	0.0141106	0.943178	0.0600197	0.0449713	0.895009	0.39505	0.531054	0.127587	0.484803	0.0625454	0.0626076	0.448718	0.409721	0.838591	0.106668	0.0493501	0.829693	0.120957	0.256643	0.159781	0.439707	0.143869	0.0880171	0.00167629	0.894616	0.0156904	0.190249	0.0440238	0.71087
861	28850.8	0	1.82669	1.82826	-26567.4	2285.33	Standard of care	0.00901342	0.42553	28850.8	0.454697	55.4008	0.0247385	0.0793508	0.121076	0.799573	0.208375	0.0291489	0.762476	0.0249808	0.0210396	0.95398	0.0222568	0.106993	0.87075	0.296004	0.702323	0.132219	0.489511	0.0273404	0.0273796	0.454758	0.425807	0.874856	0.0671399	0.168656	0.696135	0.135209	0.195032	0.153551	0.517409	0.134008	0.0701536	0.00155007	0.899461	0.0288354	0.150773	0.0845158	0.669001
862	29884.9	0	3.33617	3.3513	-25714.7	4189.13	Standard of care	0.0148811	0.44837	29884.9	0.541956	62.3248	0.0139799	0.0113426	0.224874	0.763784	0.348235	0.0205623	0.631202	0.00920443	0.0145178	0.976278	0.0456813	0.0895153	0.864803	0.299425	0.715226	0.127253	0.482082	0.0499117	0.0501642	0.542014	0.449204	0.777899	0.135011	0.098754	0.805137	0.0961085	0.342568	0.123103	0.466235	0.068093	0.054213	0.00372724	0.875151	0.0669091	0.137522	0.159254	0.595468
863	30260.5	0	0.842243	0.845955	-29207.7	1057.44	Standard of care	0.0153607	0.459672	30260.5	0.48806	55.2562	0.0534865	0.0284686	0.140716	0.830815	0.278308	0.0128864	0.708805	0.0279042	0.0378587	0.934237	0.00810811	0.0760282	0.915864	0.37221	0.89979	0.131323	0.514739	0.0125248	0.0126015	0.488105	0.460165	0.851534	0.103576	0.0715602	0.815011	0.113428	0.211102	0.166802	0.510716	0.11138	0.0318118	0.0108787	0.901318	0.0559912	0.152365	0.085539	0.696006
864	30143.3	0	2.28441	2.28653	-27287.8	2858.16	Standard of care	0.0081629	0.444185	30143.3	0.491509	55.9637	0.0318861	0.0255709	0.131172	0.843257	0.180977	0.0247253	0.794297	0.0119668	0.0090125	0.979021	0.0328087	0.0291933	0.937998	0.325059	0.780335	0.128245	0.483799	0.0342297	0.0342657	0.491552	0.444452	0.784742	0.156893	0.0881876	0.809777	0.102036	0.318875	0.142793	0.459236	0.0790954	0.0378594	0.000670978	0.916694	0.0447752	0.109658	0.100226	0.667462
865	30772.5	0	1.83565	1.82869	-28477.9	2285.87	Standard of care	0.0126092	0.465027	30772.5	0.410277	59.5487	0.0374838	0.0497637	0.177103	0.773134	0.333067	0.017315	0.649618	0.0224667	0.0310844	0.946449	0.0236149	0.0621203	0.914265	0.392025	0.871764	0.13975	0.489716	0.0274428	0.0273493	0.410331	0.465552	0.822671	0.107005	0.0821876	0.829428	0.0883842	0.230611	0.127131	0.515334	0.126924	0.0332651	9.55085e-07	0.95599	0.0107436	0.128399	0.151091	0.643179
866	31786	0	1.63085	1.63629	-29747.4	2045.37	Standard of care	0.00724133	0.405677	31786	0.505321	56.7111	0.056668	0.0634531	0.177533	0.759014	0.280999	0.0307398	0.688261	0.0365442	0.0143116	0.949144	0.021685	0.0514213	0.926894	0.401351	0.791268	0.123304	0.462112	0.0244044	0.0244923	0.505366	0.406037	0.84053	0.0644848	0.0743149	0.788673	0.137012	0.253135	0.174934	0.447528	0.124403	0.0853769	0.0150351	0.880133	0.0194551	0.183346	0.0555915	0.704916
867	32142.9	0	0.970284	0.970749	-30930	1213.44	Standard of care	0.0139066	0.456352	32142.9	0.460033	58.0661	0.0367921	0.0603439	0.186584	0.753072	0.321272	0.0438445	0.634883	0.0473011	0.0123567	0.940342	0.00990313	0.0713591	0.918738	0.352322	0.753004	0.120589	0.495139	0.0144412	0.0144639	0.460176	0.456978	0.827043	0.122626	0.0930898	0.800191	0.106719	0.329853	0.127172	0.438086	0.104889	0.0382122	0.0216536	0.88844	0.0516941	0.171355	0.0565529	0.670357
868	29330.2	0	1.91632	1.92123	-26934.8	2401.54	Standard of care	0.0119889	0.438914	29330.2	0.492771	57.2085	0.0282701	0.0340887	0.244903	0.721008	0.258362	0.0433071	0.698331	0.0279539	0.0165643	0.955482	0.0255787	0.0563351	0.918086	0.316077	0.398473	0.123722	0.49252	0.0286351	0.0287196	0.492884	0.439647	0.79133	0.155482	0.0974989	0.832752	0.0697489	0.248425	0.183867	0.493346	0.0743623	0.0703188	0.0105972	0.891928	0.0271563	0.177852	0.0815899	0.670704
869	30854.7	0	1.50385	1.50955	-28974.9	1886.94	Standard of care	0.00803788	0.432844	30854.7	0.526767	59.2002	0.00785071	0.0437932	0.166343	0.789863	0.264136	0.0201926	0.715672	0.0375553	0.0228652	0.93958	0.0187033	0.0781754	0.903121	0.291536	0.53108	0.116184	0.501716	0.0225044	0.0226017	0.526801	0.433178	0.867277	0.062774	0.0969725	0.75415	0.148877	0.27246	0.183625	0.486131	0.0577847	0.0699894	0.00456404	0.910922	0.0145241	0.18112	0.0908238	0.635955
870	31981.1	0	3.16546	3.16723	-28024.2	3959.04	Standard of care	0.0055113	0.447009	31981.1	0.501487	57.717	0.0171694	0.0276342	0.0949082	0.877458	0.207458	0.0335954	0.758947	0.0221107	0.0167655	0.961124	0.0446011	0.0666751	0.888724	0.30372	0.888795	0.120794	0.475647	0.0474617	0.0474951	0.501526	0.447142	0.756323	0.176718	0.066637	0.803452	0.129911	0.238242	0.180095	0.45265	0.129013	0.0865228	0.00401291	0.851598	0.0578659	0.131367	0.0652563	0.727407
871	30160.9	0	1.18701	1.19005	-28677.2	1487.56	Standard of care	0.0093575	0.454098	30160.9	0.492438	61.8756	0.0363152	0.0609923	0.16918	0.769828	0.255549	0.055974	0.688477	0.00335746	0.0172775	0.979365	0.0145213	0.059918	0.925561	0.399864	0.848694	0.114074	0.501127	0.0177328	0.0177879	0.492556	0.45448	0.77533	0.163925	0.07661	0.820991	0.102399	0.248613	0.140713	0.443088	0.167587	0.0269096	0.00347923	0.935442	0.0341689	0.0904227	0.126108	0.660945
872	30033.7	0	2.49924	2.50339	-26909.6	3129.23	Standard of care	0.00954697	0.41685	30033.7	0.475822	53.9824	0.0248919	0.0423601	0.197501	0.760139	0.233501	0.0776323	0.688867	0.015016	0.00743429	0.97755	0.0319893	0.11994	0.848071	0.306739	0.709218	0.122956	0.499252	0.0373981	0.0374786	0.475992	0.417333	0.79832	0.168307	0.063654	0.870795	0.065551	0.275967	0.136441	0.445653	0.141938	0.063709	6.65276e-05	0.910563	0.0256615	0.0962509	0.0278451	0.772198
873	29533.3	0	4.15085	4.15736	-24344.8	5196.7	Standard of care	0.00850528	0.40829	29533.3	0.479554	59.9987	0.0149036	0.05639	0.139297	0.804313	0.385619	0.0336535	0.580728	0.0272398	0.03342	0.93934	0.0575215	0.100306	0.842172	0.299474	0.418244	0.132684	0.451214	0.0622104	0.0623225	0.479613	0.408624	0.824416	0.102091	0.093045	0.723584	0.183371	0.290895	0.166036	0.445581	0.0974885	0.0649733	0.00829708	0.85242	0.0743099	0.161008	0.0533218	0.70999
[truncated: 127 more rows]
[truncated: 10 more columns]

## Sheet: Anemia_PSA_outputs
Iteration	Cost\n(QI for CH)	Cost\n(Standard of care)	DALY\n(QI for CH)	DALY\n(Standard of care)	dist_p_ane	dist_p_early	dist_c_QI	dist_p_early_int	dist_p_ane_test	dist_LE_sick_LBW	dist_eff_LBW_length	Dist_healthy (1)	Dist_healthy (2)	Dist_healthy (3)	Dist_ane_un (1)	Dist_ane_un (2)	Dist_ane_un (3)	Dist_ane_early (1)	Dist_ane_early (2)	Dist_ane_early (3)	Dist_ane_late (1)	Dist_ane_late (2)	Dist_ane_late (3)	dist_p_ane_treat	Infant death\n(QI for CH)	Infant death\n(Standard of care)	Maternal death\n(QI for CH)	Maternal death\n(Standard of care)	Early ANC initiation\n(QI for CH)	Early ANC initiation\n(Standard of care)	Dist_ane_un (1)	Dist_ane_un (2)	Dist_ane_un (3)	Dist_ane_early (1)	Dist_ane_early (2)	Dist_ane_early (3)	Dist_ane_late (1)	Dist_ane_late (2)	Dist_ane_late (3)	Dist_syph_un (1)	Dist_syph_un (2)	Dist_syph_un (3)	Dist_syph_un (4)	Dist_syph_early (1)	Dist_syph_early (2)	Dist_syph_early (3)	Dist_syph_early (4)	Dist_syph_late (1)	Dist_syph_late (2)
[truncated: 1,000 more rows]
[truncated: 9 more columns]

[truncated: 2 more sheets: Syphilis_PSA_outputs, SBA_PSA_outputs]
